# Supplementary material for: Small RNA sequencing unveils predominant expression patterns and miRNA-target modules active during seed development in sorghum
Source: Research Square preprint supplement (doi:10.21203/rs.3.rs-7092705/v1), 2025-07-21
Supplement: Supplementary file 2 [file f0ef32f9c243bab1a9d0d718.xlsx]

## Sheet: Table 1
Supplementary Table 1. Statistics of small RNA sequencing data from developing pistil and seeds of Sorghum bicolor M35-1.
STAGES	1-2 DBP_1	1-2 DBP_2	0-1 DAP_1	0-1 DAP_2	10 DAP_1	10 DAP_2	10 DAP_3	20 DAP_1	20 DAP_2	20 DAP_3	30 DAP_1	30 DAP_2
Raw reads	13842686	17756131	17238535	22209196	14745737	10387581	11782790	13140667	12502406	14151844	13820859	14042772
Adaptor trimmed & length filtered (20-24 nt) reads	11302824	14985650	12474423	16610055	6441136	3962291	5997871	3565463	3348097	3293793	3117868	2961007
High-quality reads (Q>30)	11139352	14765937	12290193	16367267	6355367	3905968	5914527	3511649	3301544	3243775	3068932	2917192
Unique reads	2293760	2682960	2380890	3106626	1533642	948193	1348441	1167992	1121222	1125163	947752	932331
Aligned to miRBase (22.1)	49	54	54	51	39	40	43	44	37	41	38	41
Novel miRNAs	36	33	31	33	98	64	102	87	67	76	85	81

## Sheet: Table 2
Supplementary Table 2. List of miRNAs and their respective characteristics and expression values.
miRNA family	miRNA ID	Precursor ID	Known sorghum miRNAs	Length of miRNAs	Chromosome	Strand	Location of mature miRNA	Mature miRNA sequence	Mature miRNA star sequence	Genomic location	Secondary structure	Groups	Reads per million (RPM) values
													1-2 DBP	0-1 DAP	10 DAP	20 DAP	30 DAP
miR156	sbi-miR156.1	sbi-MIR156.1	-	21	Chr10	+	56903359..56903379	UUGACAGAAGAGAGCGAGCAC	GCUCGCUUCUCUUUCUGUCAGCC	5' UTR	(((((((((((((((((((((.(((((.((.(((.((((((.....)))))))))))))))).)))))))).)))).)))))))))..	Group V	0	0	24.4339	157.796	2859.72
	sbi-miR156.2	sbi-MIR156.2	-	22	Chr10	+	56903424..56903445	GCUCGCUUCUCUUUCUGUCAGC	GCUCGCUUCUCUUUCUGUCAGC	5' UTR	((((((((((((((((((((.(((((.((.(((.((((((.....)))))))))))))))).)))))))).)))).))))))))).	Group I	63.0764	0	0	0	0
	sbi-miR156.3	sbi-MIR156.3	-	20	Chr02	-	64100795..64100814	UGACAGAAGAGAGAGAGCAC	GCUCUCUGCUCUCACUGUCAUC	CDS	((((((.((((((((((((((.(((.(((..(((((((.....)))))))..)))..)))...)))))))))).))))..))))))))	Group I	3074.14	2281.37	574.885	606.516	34.6366
	sbi-miR156.4	sbi-MIR156.4	sbi-miR156e	20	Chr10	+	56903360..56903379	UGACAGAAGAGAGCGAGCAC	GCUCGCUUCUCUUUCUGUCAGC	5' UTR	((((((((((((((((((((.(((((.((.(((.((((((.....)))))))))))))))).)))))))).)))).))))))))).	Group IV	0	66.671	19.2857	258.454	0
	sbi-miR156.5	sbi-MIR156.5-1	sbi-miR156a	20	Chr02	+	60648911..60648930	UGACAGAAGAGAGUGAGCAC	GCUCACUUCUCUUUCUGUCAGC	CDS;Intergenic	(((((((((((((((((((((((.((((.((.((((((((((((...(((......)))...))))))))((((....))))....)))))))))).))))))))))).)))).))))))))))	Group V	797.647	720.685	10944.7	26216.5	38786.9
		sbi-MIR156.5-2	sbi-miR156a		Chr03	-	3457703..3457722	UGACAGAAGAGAGUGAGCAC	GCUCACUUCUCUCUCUGUCAGC	Intergenic	((((((((((((((((((((.((((((....(((..((((((.............))))))..))))))))).)))))))).))))).)))))))))
		sbi-MIR156.5-3	sbi-miR156a		Chr03	-	3457371..3457390	UGACAGAAGAGAGUGAGCAC	GCUCACUCUCUAUCUGUCAGC	Intergenic	.(((((((((((((((((((.((((((....((((((((((.....)))))))))))))))).))))))))))))).)))))))))
		sbi-MIR156.5-4	sbi-miR156a		Chr04	-	58762530..58762549	UGACAGAAGAGAGUGAGCAC	GCUCACUGCUCUAUCUGUCAUC	CDS;5' UTR	((((((((((((((((((((.((((((.((..(((((((........))))))))))))))).))))))))).)))).)))))))..
		sbi-MIR156.5-5	sbi-miR156a		Chr04	-	5400800..5400819	UGACAGAAGAGAGUGAGCAC	GCUCACUUCUCUUUCUGUCAGC	CDS; Intronic	((((((((((((((((((((.(((((.(((((...((((...))))...)))))..))))).)))))))).)))).))))))))).
		sbi-MIR156.5-6	sbi-miR156a		Chr06	-	51368300..51368319	UGACAGAAGAGAGUGAGCAC	GCUCACUGCUCUUUCUGUCAUC	Intronic	((((((((((((((((((((.(((((....((((((((((..(((...)))))))))))))))))).))))))))).))).)))))))).)
		sbi-MIR156.5-7	sbi-miR156a		Chr07	+	60362485..60362504	UGACAGAAGAGAGUGAGCAC	GCUCACUUCUCUCUCUGUCAGA	Intergenic	((((((((((((((((((((.((((((.(((.(((((((.(((............((....))............))))))))))))))))))).)))))))).))))).)))))))).
miR159	sbi-miR159.1	sbi-MIR159.1	-	20	Chr03	-	1249005..1249024	CUUGGAUUGAAGGGAGCUCC	AGCUCCCUUCGAUCCAAUCC	CDS	(((((((((((((((((..((.(((((((((((((.((((.((.((.((((.(((((.((((((....(((((((...((((....).))).))))))).....)))))).))))).)))).)).)))))).))))....))))))))).)).)))))))))))))))))).	Group II	16.027	30.6326	0	0	0
	sbi-miR159.2	sbi-MIR159.2	sbi-miR159a	21	Chr03	-	8165596..8165616	UUUGGAUUGAAGGGAGCUCUG	GAGCUCCUAUCAUUCCAAUGA	5' UTR	((((((((.(((.(((((.((..((((.....((.(((((((.(.(((.((((.(((((....((((...(((((((((....((((((....))))))....((.((((((.(((....))).)).)))).))......)))))))))...))))....))))).)))).))).).)))).)))..))..))))..)).))))).))).))))))))))	Group III	0	0	12778.8	10049.8	5726.22
miR160	sbi-miR160.1	sbi-MIR160.1	-	21	Chr10	+	58684856..58684876	GCGUGCAAGGAGCCAAGCAUG	GCGUGCAAGGAGCCAAGCAUG	5' UTR	(((.(((((((.((((((((((.((((((..((((.(((...)).).)))).))).))).)))))))))).))))))).)))))	Group IV	0	0	1262.25	240.188	0
	sbi-miR160.2	sbi-MIR160.2-1	sbi-miR160d	21	Chr01	-	5264272..5264292	UGCCUGGCUCCCUGUAUGCCA	GCGUGCGAGGAGCCAAGCAUG	Intergenic	(((.(((((((.(((((((((.((((.(((..((((((..(....((......))....)..)))))).)))..)))).))))))))).))))))).)))))	Group I	3425.32	1744.58	172.457	209.72	2134.45
		sbi-MIR160.2-2	sbi-miR160d		Chr02	-	2890571..2890591	UGCCUGGCUCCCUGUAUGCCA	GCGUGCGAGGUGCCAAGCAUG	Intergenic	(((.((((.((.(((((((((.(((((((((((((.......((((...))))......)))))))).))))).))))))))).)).)))).)))))
		sbi-MIR160.2-3	sbi-miR160d		Chr04	-	4287077..4287097	UGCCUGGCUCCCUGUAUGCCA	GCGUGCAAGGGGCCAAGCAUG	Intergenic	(((.(((((((.((((((((((.(((((((..(((((..........))))).)))).))).)))))))))).))))))).)))))
		sbi-MIR160.2-4	sbi-miR160d		Chr07	+	2623449..2623469	UGCCUGGCUCCCUGUAUGCCA	GCGUGCACGGUGCCAAGCAUA	Intronic	(((.((((.((.(((((((((.((((((((.....((((((....)))))).))).))))).))))))))).)).)))).)))))
		sbi-MIR160.2-5	sbi-miR160d		Chr10	+	58684793..58684813	UGCCUGGCUCCCUGUAUGCCA	GCGUGCAAGGAGCCAAGCAUG	5' UTR	(((.(((((((.((((((((((.((((((..((((.(((...)).).)))).))).))).)))))))))).))))))).)))))
miR164	sbi-miR164.1	sbi-MIR164.1	sbi-miR164c	21	Chr01	-	72855979..72855999	UGGAGAAGCAGGACACGUGAG	CAUGUGUCCGUCCUCUCCACC	Intergenic	((((((.(..((((((((((((((((((((((..((((.(((((((....((((...))))..)))).))).))))......))))))))))))))))))))))..).))))))))	Group IV	0	9.11195	0	84.3122	62.9984
	sbi-miR164.2	sbi-MIR164.2	-	20	Chr04	-	68052765..68052784	UGGAGAAGCAGGGCACGUGC	ACGUGCGCUCCUUCUCCAAC	CDS	((((((((.((.(((((((((((.((.((((((....)))).)).)).)).))))))))).)).)))))))).)	Group I	333.969	102.054	181.992	49.1174	26.4368
	sbi-miR164.3	sbi-MIR164.3-1	sbi-miR164a	21	Chr02	-	77559242..77559262	UGGAGAAGCAGGGCACGUGCA	CACGUGUUCUCCUUCUCCAUC	CDS	((((((((.(((((((((((.(((.........((.((..(((.((((((((...((((((..((((((.((((.((((((....)))))).)))).))))))))))))))))))))..)))..)).))......))).))))))))))).))))))))..	Group I	22732.2	8645.32	6723.3	2080.25	2249.89
		sbi-MIR164.3-2	sbi-miR164a		Chr09	-	42435483..42435503	UGGAGAAGCAGGGCACGUGCA	CAUGUGCCCAUCUUCUCCACC	Intergenic	((((((((..(((((((((....((((((((.....((.((((((((......)).)))))))).((((.....))))..(((((....))))).))))))))....)))))))))..))))))))))
		sbi-MIR164.3-3	sbi-miR164a		Chr09	+	48683151..48683171	UGGAGAAGCAGGGCACGUGCA	CACGUGCUCCCCUUCUCCACC	Intergenic	((((((((..((((((((((((.....((.((((((.....)))))).)).((((...((((((((((((.((((..(((((....).))))..)))).)))..))))))))).))))..((.(((.(((((.((((((.((....)).)))))))))))))).))..((....)).))))))))))))..)))))))).)
	sbi-miR164.4	sbi-MIR164.4	sbi-miR164b	21	Chr04	-	68052764..68052784	UGGAGAAGCAGGGCACGUGCU	ACGUGCGCUCCUUCUCCAAC	CDS	((((((((.((.(((((((((((.((.((((((....)))).)).)).)).))))))))).)).)))))))).)	Group V	0	0	0	61.9823	22.4119
miR166	sbi-miR166.1	sbi-MIR166.1-1	sbi-miR166e	21	Chr02	+	62695686..62695706	UCGGACCAGGCUUCAAUCCCU	GGGUUGUUGUCUGGUUCAAGG	Intergenic	((((((..(((((((((.((((((.(((((.(((..((((((((.((((.......)))).))))))))...))).))).))..)))))).)))))))))..))))))).	Group I	36672.5	28290.8	945.483	598.577	714.107
		sbi-MIR166.1-2	sbi-miR166e		Chr04	-	67396184..67396204	UCGGACCAGGCUUCAAUCCCU	GGAUUGUUGUCUGGCUCGGGG	CDS	((((((..((((((.(((((((((((((((((((...((((((...))).)))...)).))))))))))))))))).))))))..))))))))
	sbi-miR166.2	sbi-MIR166.2-1	-	21	Chr04	-	66451376..66451396	UCGGACCAGGCUUCAUUCCCC	GGAAUGUUGUCUGGCUCGAGG	Intergenic	((((((..((((((.(((((((.(((.((((..((((((.....))))).)..)))).)))))))))).))))))..))))))))	Group II	292773	360798	55749.1	76984.2	94014.5
		sbi-MIR166.2-2	-		Chr01	-	83911751..83911771	UCGGACCAGGCUUCAUUCCCC	GGAAUGUUGUCUGGUUCUAGG	Intergenic	((((((..(((((((((.((((((..........(((((((....((((((((....))))))))..))))))).))).))).)))))))))..)))))).)
		sbi-MIR166.2-3	-		Chr01	-	80505231..80505251	UCGGACCAGGCUUCAUUCCCC	GGAAUGUUGUCUGGUCGGAGA	Intergenic	((((((..((((((((.((((((...((((((....(((.((((......)))).)))))))))...)))))).))))))))..))))))))
		sbi-MIR166.2-4	-		Chr01	+	7449956..7449976	UCGGACCAGGCUUCAUUCCCC	GGAAUGAUGUCCGGUCCGAAG	CDS	(((((((.(((.(((((((((.((((..((.((....)).)))))).))))))))).))).)))))))))
		sbi-MIR166.2-5	-		Chr10	-	61687914..61687934	UCGGACCAGGCUUCAUUCCCC	GGAAUGUUGUCUGGCUCGGGG	CDS;5' UTR	((((((..((((((.((((((....((((((.((((....((((.((((((((((((((((...........................................................))))))))).))))))).))))))))))))))....)))))).))))))..))))))))
		sbi-MIR166.2-6	-		Chr01	+	27087010..27087030	UCGGACCAGGCUUCAUUCCCC	GGAAUGUCGUCUGGCGCGAGA	CDS	((((((..((((((..((((((((.((((.(((..((((....).)))..)))..)))).))))))))..))))))..))))))))
		sbi-MIR166.2-7	-		Chr01	-	17404395..17404415	UCGGACCAGGCUUCAUUCCCC	GGAAUGUUGUCUGGUUCAAGG	5' UTR	((((((..(((((((((.((((((((.....(((((((((((((....(((....)))....))).))))))))))..)))))))).)))))))))..)))))).)
	sbi-miR166.3	sbi-MIR166.3-1	sbi-miR166f	21	Chr04	-	67396453..67396473	UCGGACCAGGCUUCAUUCCUC	GGAAUGUUGGCUGGCUCGAGG	CDS;5' UTR	((((((..(.((((.((((.((.((((..(((((((..(((((....)))))..))))..))).....)).)).)).)))).)))).)..))))))))	Group I	51167.4	42402.4	1781.99	1204.19	1297.69
		sbi-MIR166.3-2	sbi-miR166f		Chr08	+	49837460..49837480	UCGGACCAGGCUUCAUUCCUC	GGAAUGGAGGCUGAUCCAAGA	Intergenic	(((((((((.(((.(((.(((((((((..(((.((((((((((.((((......))))))))).))))).)))..))))))))).))).))).)))))))))..
		sbi-MIR166.3-3	sbi-miR166f		Chr04	-	67396453..67396473	UCGGACCAGGCUUCAUUCCUC	GGAUUGUUGUCUGGCUCGGGG	CDS;Intronic	((((.((((((..((.(((((.(.((((.....((((..(((((.(..((.((.(((((...((((.((..((((((((.((.((((.......)))).....(..(((.(((((((......))))))))))..)..))))))))))....))..))))..))))).)).))..).))))).))))..)))).)))))).))..)))))).)))).)
	sbi-miR166.4	sbi-MIR166.4	-	21	Chr08	+	49837458..49837478	UCUCGGACCAGGCUUCAUUCC	UCUCGGACCAGGCUUCAUUCC	Intergenic	(((((((.(((.(((.(((((((((..(((.((((((((((.((((......))))))))).))))).)))..))))))))).))).))).)))))))))	Group V	0	0	0	5422.68	7555.96
miR167	sbi-miR167.1	sbi-MIR167.1	-	22	Chr10	+	58020179..58020200	UGAAGCUGCCAGCAUGAUCUGG	GAUCAUGUUGCAGCUUCACU	Intergenic	(((((((((.((((((((((((((((((.(((((((((((((....)).)))).))).))))...)).))))))))))))))))))))))))).)	Group V	0	0	0	0	4283.32
	sbi-miR167.2	sbi-MIR167.2-1	sbi-miR167a	21	Chr01	+	4399608..4399628	UGAAGCUGCCAGCAUGAUCUA	GGUCAUGCUGCGGCAGCCUCACU	Intergenic	(((.(((((((((((((((((((.....(.(((((((((((...........)))).))))))).).....)))))))))))))..)))))).)))))	Group I	48154.2	45671.2	976.646	313.144	542.386
		sbi-MIR167.2-2	sbi-miR167a		Chr04	+	69403764..69403784	UGAAGCUGCCAGCAUGAUCUA	GGUCAUGCUGCGGCAGCCUGACU	Intergenic	(.(.((((((((((((((((((......(.(((((((((((...........)))).))))))).)......))))))))))))..)))))).).)))
		sbi-MIR167.2-3	sbi-miR167a		Chr08	+	62317245..62317265	UGAAGCUGCCAGCAUGAUCUA	GAUCAUGCAUGACAGCCUCAUU	Intergenic	(((.((((.((((((((((((((..(((((.(((.....(((.(((((.((((((.(((......)))))))))..)))))))).......))).)))))..)))))))))))).)).)))).)))))
		sbi-MIR167.2-4	sbi-miR167a		Chr01	+	7295675..7295695	UGAAGCUGCCAGCAUGAUCUA	GAUCAUGCUGUGACAGUUUCACU	Intergenic	(((((((((((((((((((((((....((.((((..((.(((((((((.((((((((.((............(((((((((((.(((((((.((((..(((...)))..)))).)).))))).)))))).))))))).))).))))).))))))))).))...))))))....)))))))))))))).).))))))))))
	sbi-miR167.3	sbi-MIR167.3	sbi-miR167d	21	Chr10	+	58020179..58020199	UGAAGCUGCCAGCAUGAUCUG	GAUCAUGUUGCAGCUUCACU	Intergenic	(((((((((.((((((((((((((((((.(((((((((((((....)).)))).))).))))...)).))))))))))))))))))))))))).)	Group II	2702.83	12023	9510.57	10108.9	0
	sbi-miR167.4	sbi-MIR167.4-1	-	22	Chr02	-	5008949..5008970	UGAAGCUGCCAGCAUGAUCUGA	AGAUCAUGCUGUGCAGUUUCAUC	Intergenic	(((((((((((((((((((((((((..((.((((....((((.(((((((...)))))))))))....))))...))..)))....))))))))))))).))))))))).)	Group IV	11341.5	35957.7	50199.4	82753.4	14362.2
		sbi-MIR167.4-2	-		Chr03	-	70418055..70418076	UGAAGCUGCCAGCAUGAUCUGA	AGAUCGUGCUGCGCAGUUUCACC	Intergenic	(((((((((((((((((((((((((((............((((..(...)..)))))))))))))))))))))).))))))))).)
		sbi-MIR167.4-3	-		Chr01	+	26297410..26297431	UGAAGCUGCCAGCAUGAUCUGA	AGAUCGUCUGGCAGUUUCAUC	Intergenic	((((((((((((.(((((((((........((((((((...............((((..(((((((((..............))))))........)))..))))...))))))))...)))))))))))))))))))))))
		sbi-MIR167.4-4	-		Chr08	+	62319551..62319572	UGAAGCUGCCAGCAUGAUCUGA	AGGUCAUGCUGUAGUUUCAUC	5' UTR	(((((((((.((((((((((((((.(((.......((((.((.(((((..(((((((((...((((.(((((......)))))))))...)))).)))))...)))))))))))))))))))))))))))))))))))))))
		sbi-MIR167.4-5	-		Chr01	-	80744027..80744048	UGAAGCUGCCAGCAUGAUCUGA	AGAUCAUCUGGCAGUUUCAUU	Intergenic	((((((((((((.(((((((((...(((.....((.(((((((.....))))))).)).....))).)))))))))))))))))))))))
miR168	sbi-miR168.1	sbi-MIR168.1	sbi-miR168	21	Chr04	-	2297927..2297947	UCGCUUGGUGCAGAUCGGGAC	CCCGCCUUGCACCAAGUGAAU	CDS	(((((((((((((..(((((.(((((((((....))).)))..))).)))))..))))))))))))).)	Group IV	11359.3	14319.5	220686	268879	130765
miR169	sbi-miR169.1	sbi-MIR169.1	-	20	Chr01	-	1049656..1049675	UAGCCAGGGAUGAUUUGCCC	GCAAAUCAUUCCUGGCUAAUC	Intergenic	((((((((((((((((((((((.(((..((((((.(((((((.........((((((....))))))))))))))).))))....))).)).))))))))))))))))))).)))	Group III	0	0	41.4722	0	0
	sbi-miR169.2	sbi-MIR169.2	sbi-miR169a	21	Chr03	+	10805377..10805397	CAGCCAAGGAUGACUUGCCGA	GGCAAGUUGUUCUUGGCUACA	Intergenic	.((((((((((((((((((((.(((.(((((........(((((((........))))))).)))))))))))))))))))))))))))).))	Group I	558.384	207.752	0	0	150.184
	sbi-miR169.3	sbi-MIR169.3-1	sbi-miR169b	21	Chr06	-	57167741..57167761	CAGCCAAGGAUGACUUGCCGG	GGCAAGUCUGUCCUUGGCUACA	Intronic;3' UTR	.((((((((((((((((((((((...........((((.(((.(......).))).))))...........)))))))))))).)))))))))).))	Group V	77.3717	161.108	72.5956	111.265	747.831
		sbi-MIR169.3-2	sbi-miR169b		Chr10	-	57710898..57710918	CAGCCAAGGAUGACUUGCCGG	GGCAAGUUGUCCUUGGCUACGCC	Intergenic	((((((((((((((((((((((.(((.(((.((...(((.(((.((..((....))..))))).))).)).))).)))..)))))))))))))))))))))..)).
	sbi-miR169.4	sbi-MIR169.4-1	sbi-miR169e	21	Chr02	-	60169267..60169287	UAGCCAAGGAUGACUUGCCGG	GGCAAGUCAUCUGUGGCUACG	Intergenic	((((((.(((((((((((((((......(.((((....)))).)((((((((..(((((..........))))).))))))))..))))))))))))))).))))))))	Group I	16223.9	12134	1074.79	110.351	0
		sbi-MIR169.4-2	sbi-miR169e		Chr04	+	61201621..61201641	UAGCCAAGGAUGACUUGCCGG	GGCAGGUUCUUCUCUUUGGCUACA	5' UTR;CDS	((((((((((.((((((((((.((((((((((((((((((.....)))..((((((....))))))......)))))))......)))))))).))))))))))....))))))))))))
	sbi-miR169.5	sbi-MIR169.5-1	sbi-miR169f	21	Chr02	+	65839601..65839621	UAGCCAAGGAUGACUUGCCUG	GGCAGUCUCCUUGGCUAGCC	Intergenic	((((((((((.((((.(((((((((..((((.((((((((((((((((......))))))).)))).).))).).))))..)))....))))))))))))))))))).)))	Group I	20.8351	61.4085	0	0	14.0996
		sbi-MIR169.5-2	sbi-miR169f		Chr02	+	65842434..65842454	UAGCCAAGGAUGACUUGCCUG	GGCAGUCUCCUUGGCUAGUC	Intergenic	((((((((((.((((.((((((((..((..((((..((..((((((..(((((............)))))..)))).))..))))))..))))))))))))))))))))))).)))
		sbi-MIR169.5-3	sbi-miR169f		Chr07	-	65640513..65640533	UAGCCAAGGAUGACUUGCCUG	GGCAGUCUCCUUGGCUAGCC	Intergenic	((((((((((.((((.(((((((....((((.((((((..(.((((((...(((((((.........((((((.((..(((((((((((((((((.((((..((.((...))..))..)))))))))))))))))))))..)))))))))))))))..)))))))..)))))).)))).)))))))))))))))))))).)))
		sbi-MIR169.5-4	sbi-miR169f		Chr07	-	65627968..65627988	UAGCCAAGGAUGACUUGCCUG	GGCAGUCUCCUUGGCUAGC	Intergenic	((((((((((.((((.(((((((.(((((((..((((((.(((......))).))))))..))))).))..)))))))))))))))))))))..
miR171	sbi-miR171.1	sbi-MIR171.1-1	-	21	Chr04	-	65278393..65278413	UGAGCCGAACCAAUAUCACUC	GUGAUGUUGUUUCGGCUCAUG	Intergenic	(((((((((.((((((((((((...((.(((((((........))))))).)).)).)))))))))).)))))))))))	Group V	56.7945	81.5162	54.6651	23.4533	168.471
		sbi-MIR171.1-2	-		Chr06	+	55053895..55053915	UGAGCCGAACCAAUAUCACUC	GUGGUAUUGUUUCGGCUCAUG	Intergenic	(((((((((.((((((((((((((.(((...(((((........)))))....))).).))))))))))))).)))))))))))
	sbi-miR171.2	sbi-MIR171.2-1	-	21	Chr06	-	58168521..58168541	UUGAGCCGUGCCAAUAUCACG	GGAUAUUGGCGCGGUUCAAUC	Intergenic	.(((((((((((((((((((((((.((...(.(((((........))))).)..)).))))))))))))))))))))))).))	Group II	0	4914.4	0	0	0
		sbi-MIR171.2-2	-		Chr07	+	7681732..7681752	UUGAGCCGUGCCAAUAUCACG	GGGUAUUGGCGCGGUUCAAUU	Intergenic	.((((((((((((((((((((.((((((..(((((((...((...(.....)...))..))))))).)))))).)))))))))))))))))))).))
	sbi-miR171.3	sbi-MIR171.3-1	sbi-miR171b	21	Chr01	-	82288116..82288136	UGAUUGAGCCGUGCCAAUAUC	UGUUGGCUCGGCUCACUCAGA	Intergenic	(((((((.(((((((.(((((((((.....(((........))).(.(((..(((((((..((.....))..)))))))))).)))))..))))).))))))).)))))))))	Group III	2310.43	1015.97	44630.6	32459.5	40557.7
		sbi-MIR171.3-2	sbi-miR171b		Chr01	-	63788875..63788895	UGAUUGAGCCGUGCCAAUAUC	UGUUGGCUCGGCUCACUCAGA	Intergenic	(((((((.(((((((.((((((((.(..(((((..(.((........)).)..)))))..))))))))).))))))).)))))))))
		sbi-MIR171.3-3	sbi-miR171b		Chr01	-	7868808..7868828	UGAUUGAGCCGUGCCAAUAUC	UGUUGGCAUGGUUCAAUCAAA	Intergenic	((((((((((((((((((((((..(((((......))))).......(((((((((.(((....))))))))))))..((((((....))))))..))))))))))))))))))))))))
		sbi-MIR171.3-4	sbi-miR171b		Chr06	-	58168524..58168544	UGAUUGAGCCGUGCCAAUAUC	UAUUGGCGCGGUUCAAUCAGA	Intergenic	(((((((((((((((((((((.((...(.(((((........))))).)..)).)))))))))))))))))))))))
		sbi-MIR171.3-5	sbi-miR171b		Chr07	+	7681729..7681749	UGAUUGAGCCGUGCCAAUAUC	UAUUGGCGCGGUUCAAUUCGA	Intergenic	((((((((((((((((((.((((((..(((((((...((...(.....)...))..))))))).)))))).))))))))))))))))))))
	sbi-miR171.4	sbi-MIR171.4	-	21	Chr01	-	15739313..15739333	UUGAGCCGCGUCAAUAUCUCC	AGGUAUUGGCGCGCCUCAAUC	Intergenic	(((((((((((((.((((((((((.((((((((((...........)))))))))).)))))))))).)))))))))))))))	Group I	117104	83506.1	24844.7	13437.5	6607.36
	sbi-miR171.5	sbi-MIR171.5	-	21	Chr10	+	55981771..55981791	UUGAGCCGCGCCAAUAUCUCU	CGAUAUUGGUGAGGUUCAAUC	Intergenic	.((((((((((.(((((((((.((((...(((((((((......)))))))))..)))).))))))))).)))))))))).))	Group I	385.108	63.3742	0	159.039	163.946
miR172	sbi-miR172.1	sbi-MIR172.1-1	-	21	Chr04	-	70187524..70187544	AGAAUCUUGAUGAUGCUGCAU	GCAGCACCAUCAAGAUUCACA	Intergenic	((((((.(((((((((((.(((.(.(((.(.((((((((......)))))..))).).))))(((((..(((.......)))..)))))....))).))))))))))).))))))))	Group II	4.80809	34.4207	0	0	0
		sbi-MIR172.1-2	-		Chr02	+	22398105..22398125	AGAAUCUUGAUGAUGCUGCAU	AGAAUCUUGAUGAUGCUGCAU	Intergenic	((((((((((((((((((.((.(((.(.(((((((((.........))))))))).))).).)).....)))))))))))))))))).)
	sbi-miR172.2	sbi-MIR172.2-1	-	21	Chr02	+	14179987..14180007	GCAGCAUCAUCAAGAUUCACA	CGAACCUUGAUGCUGCUGCAC	Intergenic	((((((.(((((((.(((.(.((((((.((.((....))..)).)).)).))).))).))))))).))))))))	Group II	44.8388	356.8	0	0	0
		sbi-MIR172.2-2	-		Chr09	-	62579325..62579345	GCAGCAUCAUCAAGAUUCACA	AGAAUCUUGAUGAUGCUGCAU	Intergenic	((((((((((((((((((.((((....(((((.......(((((((((((......))))).))))))..))))))))).))))))))))))))))))))
	sbi-miR172.3	sbi-MIR172.3	-	20	Chr05	-	19525533..19525552	GCGGCAUCAUCAGGAUUCAC	GAAUCCUGAUGAUGCUGCAC	Intergenic	((((((((((((((((((.(((((((((..((((....)))).(((((........)))))......((((((........)))))))))))).))).))))))))))))))))))))	Group II	0	14.4563	0	0	0
	sbi-miR172.4	sbi-MIR172.4	-	21	Chr02	+	22398037..22398057	GUGGCAUCAUCAAGAUUCACA	AGAAUCUUGAUGAUGCUGCAU	Intergenic	((((((((((((((((((.((.(((.(.(((((((((.........))))))))).))).).)).....)))))))))))))))))).)	Group II	42.0202	30.6326	0	0	0
	sbi-miR172.5	sbi-MIR172.5-1	-	21	Chr03	-	80581872..80581892	GGAAUCUUGAUGAUGCUGCAU	GUGGCAUCAUCAAGAUUCACA	CDS;5' UTR; Intronic	((((((((((((((((((.(((((.((..(((((((((....)))))..............))))..))......((((((((..((.....))...)))))))).((((.((((((((..........)))))))))))).))))).)))))))))))))))))).)	Group II	83.6536	141.328	44.3411	0	0
		sbi-MIR172.5-2	-		Chr03	-	80581872..80581892	GGAAUCUUGAUGAUGCUGCAU	GCAUGCAUUGUUCAGCUUAGCA	Intronic;CDS	..((.((.(((((((((((.((((((((((((((((..........((((((..(((((((...)))............)))).))))))..........))))))).))))...)))))((......))..))).)))))))).)).))..))
miR319	sbi-miR319.1	sbi-MIR319.1-1	-	21	Chr03	-	64671669..64671689	UUGGACUGAAGGGUGCUCCCU	AGAGCUCUCUUCAGUCCACUC	Intergenic	.((((.((((((((((((..((((((((((.(((((((((..((((((.(((..((((((((((..(((((((((.(((..(((.........)))))))))))))))..))))))))))..))).))))))....)))))))))))))))).))).)))))))))))).)))).))	Group I	51440.5	41251.9	4607.47	8988.23	18537.7
		sbi-MIR319.1-2	-		Chr03	+	1264259..1264279	UUGGACUGAAGGGUGCUCCCU	GAGAGCGUCCUUCAGUCCACUC	Intergenic	(.(((((((((((((((((..((((((.(((((..(((((((((((.((.(((..((((((((.((..(((.((((....((((........).))).)))).)))..)).))))))))..))).)).)))....)))))))).))))).))))))..)))))))))))))))))).)
miR384	sbi-miR384.1	sbi-MIR384.1-1	-	20	Chr02	+	68139428..68139447	UUGGCAUUCUGUCCACCUCC	AGGUGGACAUACUGCCAAUG	Intergenic	((((((...(((((((((((.....((.((.((......)))).)).....)))))))))))...)))))).)	Group I	13934	7289.24	29.8051	23.5359	275.906
		sbi-MIR384.1-2	-		Chr04	-	65456191..65456210	UUGGCAUUCUGUCCACCUCC	AGGUGGGCAUACUGCCAAUG	Intergenic	((((((...(((((((((((........(..(((...)))..).........)))))))))))...)))))).)
miR390	sbi-miR390.1	sbi-MIR390.1	sbi-miR390	21	Chr01	+	2901594..2901614	AAGCUCAGGAGGGAUAGCGCC	CGCUAUCUAUCCUGAGCUCCA	Intronic	.(((((((((.(((((((((...(((......((((((.((((((((((.....((((((((((((((((.(.((((((..(((((........)))))....))))))).))))))))))))))))..))))))))))))))))...)))...))))))))).))))))))).))	Group V	683.303	491.473	478.142	835.933	1194.58
miR393	sbi-miR393.1	sbi-MIR393.1	-	21	Chr06	-	61881131..61881151	CUCCAAAGGGAUCGCAUUGAU	CAGUGCAAUCCCUUUGGAAUU	CDS	.(((((((((((.((((((((((....((((.((((((((.......))).))).)))).)))))))))))).))))))))))).))	Group II	3203.3	8020.7	5172.54	5200.29	2284.71
	sbi-miR393.2	sbi-MIR393.2	sbi-miR393a	21	Chr03	+	6489711..6489731	UCCAAAGGGAUCGCAUUGAUC	UCCAAAGGGAUCGCAUUGAUCC	Intergenic	((((((((((((((((.((((((((.......((((((......)))))).((..((((....))))..)).....)))))))))))))))))))))))).)	Group V	158.465	0	165.448	100.282	205.145
miR394	sbi-miR394.1	sbi-MIR394.1-1	sbi-miR394a	20	Chr02	+	68139428..68139447	UUGGCAUUCUGUCCACCUCC	AGGUGGACAUACUGCCAAUG	Intergenic	((((((...(((((((((((.....((.((.((......)))).)).....)))))))))))...)))))).)	Group I	13934	7289.24	29.8051	23.5359	275.906
		sbi-MIR394.1-2	sbi-miR394a		Chr04	-	65456191..65456210	UUGGCAUUCUGUCCACCUCC	AGGUGGGCAUACUGCCAAUG	Intergenic	((((((...(((((((((((........(..(((...)))..).........)))))))))))...)))))).)
miR395	sbi-miR395.1	sbi-MIR395.1-1	-	21	Chr07	+	4598780..4598800	GUUCCCUUCAAGCACUUCACA	UGAAGUGCUUGGGGGAACUC	Intergenic	(((((((.(((((((((((((....((((((.(((.(((.....)))..)))..))))))..))))))))))))))))))))))	Group II	0	3.60384	0	1.68113	0
		sbi-MIR395.1-2	-		Chr07	+	4598474..4598494	GUUCCCUUCAAGCACUUCACA	UGAAGUGUUUGGAGGAACUC	Intergenic	(((((.((((((((((((((((....(((((((((....))))).)....)))....)))))))))))))))))))))))
	sbi-miR395.2	sbi-MIR395.2-1	-	20	Chr06	+	59202906..59202925	UGAAGUGUUUGGGGGAACUC	GUUCUCUACAAGCACUUCACG	Intergenic	(((((((((((((((((((((.((.((((.((((((.....)))).(((((...((((((((((((((((.(((((.((........))))))))).))))).)))))))))...)))))((..(((.(.(((........)))))))..)).(((......))).)))))).)).)))))))))).)))))))))))).	Group II	278.907	427.832	122.571	229.162	0
		sbi-MIR395.2-2	-		Chr06	+	59203455..59203474	UGAAGUGUUUGGGGGAACUC	GUUCUCUGCAAGCACUUCACG	Intergenic	(((((((.(((((((((((((((((.((.......)))).))))))))))))))))))))))))
		sbi-MIR395.2-3	-		Chr06	+	59203790..59203809	UGAAGUGUUUGGGGGAACUC	GUUCCCUUCAAGCACUUCACA	Intergenic	(((((((.((((((((((((((...((((((.((((((...))))..)).).))))).)))))))))))))))))))))))
		sbi-MIR395.2-4	-		Chr06	+	59203616..59203635	UGAAGUGUUUGGGGGAACUC	GUUCCCUAAAAGCACUUCACG	Intergenic	(((((((..((((((((((((((.....(((((......))))))))))))))))))).)))))))))
		sbi-MIR395.2-5	-		Chr06	-	58638538..58638557	UGAAGUGUUUGGGGGAACUC	GUUCUCUGCAAGCACUUCACG	Intergenic	(((((((.(((((((((((((((((.((......)).)).))))))))))))))))))))))))
		sbi-MIR395.2-6	-		Chr06	-	58638012..58638031	UGAAGUGUUUGGGGGAACUC	GUUCCCUACAAGCACUUCACG	Intergenic	(((((((.((((((((((((((((((((..........))))))..)))))))))))))))))))))))
		sbi-MIR395.2-7	-		Chr07	+	4598198..4598217	UGAAGUGUUUGGGGGAACUC	GUUCCCUGCAAACACUUCACA	Intergenic	(((((((.((((((((((((.(((((((((((((...(((......)))...)))))))..........)))))).)))))))))))))))))))))
		sbi-MIR395.2-8	-		Chr07	+	4598371..4598390	UGAAGUGUUUGGGGGAACUC	GUUCCCUUCAAGCACUUCACA	Intergenic	(((((((.((((((((((((((....(((..(((..((((((....)))))))))..)))....)))))))))))))))))))))))
		sbi-MIR395.2-9	-		Chr07	+	4598371..4598390	UGAAGUGUUUGGGGGAACUC	GUUCCCUUCAAGCACUUCACA	Intergenic	(((((((((((((((((((((.((((.((((.((((.......((((((......))))))....((((((.......)))))).)))).)))).)))).))))))))).))))))))))))))
miR396	sbi-miR396.1	sbi-MIR396.1-1	-	21	Chr06	+	61301619..61301639	GUUCAAGAAAGCCCAUGGAAA	GUUCAAGAAAGCCCAUGGAAA	Intergenic	((((..((((((((((((((((.(((..(((((((...((((((....))))))....))).....(((.((((((((.((......))))).))))))))((((((..(((((((.......(((((....))))))))))))))))))..))))..))).))))))))))))))))..))))))	Group IV	0	0	183.369	21.8727	0
	sbi-miR396.2	sbi-MIR396.2-1	-	21	Chr04	-	70822795..70822815	UCCACAGGCUUUCUUGAACUG	GUUCAAGAAAGUCCUUGGAAA	Intergenic	((((..((((((((((((((((.(((.(((..(((.((....(((......)))...)).))).))).))).))))))))))))))))..)))).)	Group I	28016.8	13116.6	10.6056	14.061	487.613
		sbi-MIR396.2-2	-		Chr06	+	61301454..61301474	UCCACAGGCUUUCUUGAACUG	GUUCAAGAAAGCCCAUGGAAA	Intergenic	((((..((((((((((((((((.(((..(((((((...((((((....))))))....))).....(((.((((((((.((......))))).))))))))((((((..(((((((.......(((((....))))))))))))))))))..))))..))).))))))))))))))))..))))))
	sbi-miR396.3	sbi-MIR396.3	sbi-miR396c	21	Chr04	+	69267133..69267153	UUCCACAGCUUUCUUGAACUU	GGUCAAGAAAGCUGUGGGAAG	Intergenic	(((((((((((((((((.(((((.......(((((.(((...))).))).))....((.....))...................................))))).)))))))))))))))))))	Group II	12560.4	6662.34	0	0	0
	sbi-miR396.4	sbi-MIR396.4-1	sbi-miR396b	21	Chr04	-	69274421..69274441	UUCCACAGCUUUCUUGAACUG	GUUCAAUAAAGCUGUGGGAAA	Intergenic	((((((((((((.(((((((((....(((.((((.((.(.((....)).))).)))))))....))))))))).)))))))))))).)	Group I	10954.9	7903.27	24.9995	6.72453	69.6108
		sbi-MIR396.4-2	sbi-miR396b		Chr10	+	4494542..4494562	UUCCACAGCUUUCUUGAACUG	GUUCAAUAAAGCUGUGGGAAA	Intergenic	((((((((((((.(((((((((..........((((.((......))))))((((((....))))))))))))))).))))))))))))..
miR397	sbi-miR397.1	sbi-MIR397.1	sbi-miR397-3p	21	Chr04	-	4075373..4075393	UCACCGGCGCUGCACUCAAUU	UUGAGUGCAGCGUUGAUGAGC	3' UTR	(((((((((((((((.((((((.(.((((((((..((((.(((.....)))))))))))))))))))))).)))))))))))))))).	Group II	88.1484	111.166	0	0	0
miR398	sbi-miR398.1	sbi-MIR398.1-1	-	21	Chr02	-	15210110..15210130	GGGGCGGACUGGGAACACAUG	GGGGCGGACUGGGAACACAUG	Intergenic	((((((..(((((((((((((.(.(((((((((.((...((((((((.....))))..))))......)).)))).))))).).)))))))))))))..))))))))	Group IV	3.2054	0	11.6352	135.95	0
		sbi-MIR398.1-2	-		Chr02	-	15210110..15210130	GGGGCGGACUGGGAACACAUG	UCUUCCUCGCCUGCUCCUA	Intergenic	(.(((((.(.((((((((..(((.((.....(((.....((((......)))).....)))))))))))))))).).)))))...)))
	sbi-miR398.2	sbi-MIR398.2	sbi-miR398	21	Chr02	-	15210024..15210044	UGUGUUCUCAGGUCGCCCCCG	GGGGCGGACUGGGAACACAUG	Intergenic	((((((..(((((((((((((.(.(((((((((.((...((((((((.....))))..))))......)).)))).))))).).)))))))))))))..))))))))	Group IV	14.0375	38.0655	111.337	376.45	218.645
miR399	sbi-miR399.1	sbi-MIR399.1-1	sbi-miR399a	21	Chr03	+	68197675..68197695	UGCCAAAGGAGAAUUGCCCUG	GGGCAGUUCGUCUUUGGCACA	Intergenic	(((((((((.((((((((((....(((.((.(((..(..((((((((...))).)))))..)..))).)).))))))))))))).)))))))))))	Group II	203.211	703.239	84.3148	4.687	0
		sbi-MIR399.1-2	sbi-miR399a		Chr09	-	59309197..59309217	UGCCAAAGGAGAAUUGCCCUG	GGGUACAUCUCCUUUGGCACA	Intergenic	(((((..(((((((((((((....((.((..((((..(((((((....)))))))...)))))).)))))))))))))))..)))))))
		sbi-MIR399.1-3	sbi-miR399a		Chr10	+	49778807..49778827	UGCCAAAGGAGAAUUGCCCUG	GUGCGGUUCUCCUCUGGCAUG	Intergenic	(.(((((((((((.(((((.((((((....(((((.((((((....))))).)...))))).))).))).))))).))))))))))).)))
		sbi-MIR399.1-4	sbi-miR399a		Chr04	-	9930450..9930470	UGCCAAAGGAGAAUUGCCCUG	GUGCGGUUCUCCUCUGGCAUG	Intergenic	(.(((((((((((.(((((....(((.(((((..((.....(((....)))...))..))))).)))..))))).))))))))))).)))
	sbi-miR399.2	sbi-MIR399.2	sbi-miR399b	21	Chr04	-	9909891..9909911	UGCCAAAGGAGAGCUGCCCUG	GUGCAGCUCUCCUCUGGCAUG	Intergenic	(.(((((((((((.(((((.(((((((.((((((.(.......))))))))))))))...))))).))))))))))).)))	Group II	139.435	651.332	171.811	0	0
	sbi-miR399.3	sbi-MIR399.3-1	sbi-miR399d	21	Chr06	+	55478034..55478054	UGCCAAAGGAGAGUUGCCCUG	GGGCUUCUCUUUCUUGGCAGG	Intergenic	((((..((((((.(((((((((.(((.(((.((....(((...))))).)))))).))))))))).))))))..))))))	Group II	637.745	2623.47	1576.53	667.081	26.3243
		sbi-MIR399.3-2	sbi-miR399d		Chr10	+	1601630..1601650	UGCCAAAGGAGAGUUGCCCUG	GGCAGCUCUCCUCUGGCAGG	5' UTR;CDS	((((((((((((.((((((((((.(...(((((((....)))))))(((.((((........)))).))).(((((...(((((((((((((((((((.....))))).))))))))...))))))...)))))..)))).))))))).)))))))))).))))
miR408	sbi-miR408.1	sbi-MIR408.1	-	21	Chr03	+	15968064..15968084	ACAGGGACGAGGCAGAGCAUG	ACAGGGACGAGGCAGAGCAUG	Intergenic	.((((((.(((((((.(((.(((...(((((((((.((((((...((((....(((((((...........))))))))))).))))((((.((((((((............))))))))))))......)).)))))))))(((.((((.((((............))))..)))).))))))))).))))))).)))))).))	Group IV	2.33958	0	74.4488	227.599	0
	sbi-miR408.2	sbi-MIR408.2	sbi-miR408	21	Chr03	+	15968247..15968267	CUGCACUGCCUCUUCCCUGGC	CAGGGACGAGGCAGAGCAUGGG	Intergenic	((((((.(((((((.(((.(((...(((((((((.((((((...((((....(((((((...........))))))))))).))))((((.((((((((............))))))))))))......)).)))))))))(((.((((.((((............))))..)))).))))))))).))))))).)))))).)	Group V	0	0	0	0	698.307
	sbi-miR408.3	sbi-MIR408.3	-	21	Chr03	+	15968248..15968268	UGCACUGCCUCUUCCCUGGCU	ACAGGGACGAGGCAGAGCAUG	Intergenic	.((((((.(((((((.(((.(((...(((((((((.((((((...((((....(((((((...........))))))))))).))))((((.((((((((............))))))))))))......)).)))))))))(((.((((.((((............))))..)))).))))))))).))))))).)))))).))	Group II	6.41079	5.46717	0	0	0
miR479	sbi-miR479.1	sbi-MIR479.1-1	-	21	Chr06	+	55053895..55053915	UGAGCCGAACCAAUAUCACUC	GUGGUAUUGUUUCGGCUCAUG	Intergenic	(((((((((.((((((((((((((.(((...(((((........)))))....))).).))))))))))))).)))))))))))	Group V	56.7945	81.5162	54.6651	23.4533	168.471
		sbi-MIR479.1-2	-		Chr04	-	65278393..65278413	UGAGCCGAACCAAUAUCACUC	GUGAUGUUGUUUCGGCUCAUG	Intergenic	(((((((((.((((((((((((...((.(((((((........))))))).)).)).)))))))))).)))))))))))
miR528	sbi-miR528.1	sbi-MIR528.1	sbi-miR528	21	Chr01	-	82725848..82725868	UGGAAGGGGCAUGCAGAGGAG	CCUGUGCCUGCCUCUUCCAUU	3' UTR	(((((((((((.(((.(((((((((((((((((((...)))))).....)))))).))...))))).))).)))))))))))))	Group IV	77.8507	142.822	2573.22	7864.81	6638.73
miR529	sbi-miR529.1	sbi-MIR529.1	-	21	Chr04	+	47112618..47112638	AGAAGAGAGAGAGUACAGCCU	GCUGUACCCUCUCUCUUCUUC	Intergenic	(((((((((((.((((((((((..(((.....(((((((((.....((((((..(........)..))))))...)).)))))))))))))))))))).)))))))))))))	Group II	1120.56	1150.5	519.848	170.89	32.5992
miR530	sbi-miR530.1	sbi-MIR530.1	-	21	Chr06	-	6386026..6386046	UGCAUUUGCACCUGCACCUCC	UGCAUUUGCACCUGCACCUCC	Intergenic	(((((((((.(((((((((..((((((.((....(((..(((((.((((.(((((((((...)))))))....)).)))).)))))))).)).))))))..))))))))).)))))))))))	Group IV	37.949	10.9343	16.969	68.9264	7.04982
miR827	sbi-miR827.1	sbi-MIR827.1	-	21	Chr04	-	53415368..53415388	UUAGAUGACCAUCAGCAAACA	UUUUGUUGGUGGUCAUUUAACC	Intergenic	(((.((((((((((((((((((((((.((((((...))))))((((((((......))).))))).(((((((((((((((.....)))))).))).))))))....)))))))))))))))))))))))))))	Group V	2247.59	1370.48	374.578	379.184	3550.87
miR1432	sbi-miR1432.1	sbi-MIR1432.1	-	20	Chr02	-	72952109..72952128	CUCAGGAGAGAUGACACCGA	GGUGUCAUCUCGCCUGAAGCA	Intergenic	((((((.(((((((((((.((.(((((((((((((.((.....))))).....)))))))))).)).))))))))))).)))).))))	Group II	0	290.129	70.5442	178.472	112.947
miR2118	sbi-miR2118.1	sbi-MIR2118.1-1	-	22	Chr06	-	46846422..46846443	UUCCCAAUGCCUCCCAUUCCUA	GGAAUGGGAACAUGGAGGAAA	Intergenic	(((((((((.(((((.((((.(((...((.....((((((.((((........)))).))))))..))...))).)))))).)))..)))))))))))	Group II	442.622	349.715	0	0	0
		sbi-MIR2118.1-2	-		Chr06	-	46733689..46733710	UUCCCAAUGCCUCCCAUUCCUA	GGCAUGGGAACAUGGAGGAAAG	Intergenic	(((((.(((..((((((.((((.(((((((((((.(((((((.((((((...(((((((((((((((((((((..............))))))(.(((((.......))))).)..)))))...)))))))))))))))).)))).....))).))))))))))).)))).)))))).))).).))))))
	sbi-miR2118.2	sbi-MIR2118.2	sbi-miR2118-3p	22	Chr06	-	46846209..46846230	UUCCUGAUGCCUCCCAUGCCUA	GGCAUGGGAACAUGUAGGAAGG	Intergenic	(((((((((.(((.(((((((((((..(((((((.....)))))))))))))))))))))..)))))))))))	Group II	719.41	723.572	0	0	0
miR5169	sbi-miR5169.1	sbi-MIR5169.1-1	-	21	Chr02	-	68471877..68471897	UUUUCUACAAACUUGGUCAAA	UGACCAAGUUUACGGAAAAAU	Intronic	(((((((((((..((((((((..........................((((((((((((....(((((((..........)))))))...))))))))))))..((....))))))))))..)))))))))))))	Group II	97.9489	30.7759	0	0	0
		sbi-MIR5169.1-2	-		Chr02	+	65596025..65596045	UUUUCUACAAACUUGGUCAAA	UGACCAGGUUUAUAGCAAAAUG	Intronic	(((((((((((.(((.((((......(((((((.((.((((.((((((((.(((((..((((.(((...)))..))))))))).....)))))))).)))))).)))))))))))))).)))))))))))..
		sbi-MIR5169.1-3	-		Chr03	+	70859113..70859133	UUUUCUACAAACUUGGUCAAA	UGAUCAAGUUUUUAGAAAAAU	Intronic	(((((((((((.((((((((..((((((.(((((((((((((...((((....((.(((.((......)).)))))....))))...))))).........)))))))).))))))..)))))))).)))))))))))))
		sbi-MIR5169.1-4	-		Chr09	-	58671200..58671220	UUUUCUACAAACUUGGUCAAA	UGGCCAAGUCUGUAGAAAAAU	Intronic	(((((((((.(((((((((((((((((((((.((((.........(((..(((((..(..((........))..)..)))))..))).......)))).))))))))))))))))))))).)))))))))))
		sbi-MIR5169.1-5	-		Chr05	+	1929188..1929208	UUUUCUACAAACUUGGUCAAA	UAACCAAGUUUAUAGAAAAAA	Intronic	(.(((((((((.(((((((..(((....((((.((((((.((((((..(((..((((((...........................))))))..)))....)))))).)))))).))))..))).))))))).))))))))).)))
		sbi-MIR5169.1-6	-		Chr06	+	11663717..11663737	UUUUCUACAAACUUGGUCAAA	UUGAUCAAGUUUCUAGAAAAAAUA	Intronic	(.((((((((((.((((((..(((((..(((((((((((..((((((...((.....(((((((((((...))))))..))))).....)).))))))..)))))))))))..))))))))))).)))))))))))))
miR5385	sbi-miR5385.1	sbi-MIR5385.1	-	21	Chr06	-	56757044..56757064	CCACCAACACCACCGCUUCUC	GAAGCGGUGGGGUUGGUGGUG	CDS	((((((((.((((((((((((((((...)).)).)))))))))))).))))))))))	Group II	0	21.7459	0	0	0
miR5564	sbi-miR5564.1	sbi-MIR5564.1	-	21	Chr05	+	74824184..74824204	UGGGAAGCAAUUCGUCGAACA	UUUGGCGAAUUGCUUUACCCAUG	CDS	((((((((((((((((((((((((((.(((((....(((.(.((((.....))))).))).)))))..)).))))))))))))))))))))..)))).)	Group V	154342	183788	124535	75369.1	220535
	sbi-miR5564.2	sbi-MIR5564.2-1	-	21	Chr05	+	74827504..74827524	UGGGGAAGCAAUUCGUCGAAC	UGGGGAAGCAAUUCGUCGAAC	Intergenic	(((((((((((.((((((((((((((((((((.....((.(((((((.....)))).))).))))))).)).))))))))))))).))))))).))))))	Group V	41014.7	20350.6	160295	138241	349992
		sbi-MIR5564.2-2	-		Chr07	-	66707575..66707595	UGGGGAAGCAAUUCGUCGAAC	UCGGCGAAUUGCUCCACGCAUG	Intergenic	((((((.(((((((((((((((((((.(((.((.(.((.(..((((((..((((......))))))))))..)))))))))...)))))))))))))))))))))).).))))
miR6223	sbi-miR6223.1	sbi-MIR6223.1	sbi-miR6223-3p	21	Chr07	+	8166135..8166155	CUAGCAUGUUCCUCCUAAGAG	CUUGGGAGGAGCAUGCUAGAA	Intergenic	(((((((((((((((((((.((((((((.(((((((.....))))))).)))))))).)))))))))))))))))))))	Group I	155.867	92.4301	72.2255	39.0584	89.4353
miR6234	sbi-miR6234.1	sbi-MIR6234.1-1	sbi-miR6234a-3p	24	Chr09	-	51019897..51019920	UUAGCGUCAAGAGACGAACACACU	UGUGUUCCUCUAUUUGAUGCUAAAG	Intronic	(((((((.(((.((((((((((((((((((((((...((((.(((((..((....))..).)))).))))....)))))))..)))))))))))))))))).)))))))))	Group IV	0	0	776.686	519.973	0
		sbi-MIR6234.1-2	sbi-miR6234a-3p		Chr09	-	51015370..51015393	UUAGCGUCAAGAGACGAACACACU	UGUGUUCCUCUAUUUGAUGCUAAAG	Intronic	(((((((.(((.(((((((((((((((((((.(((..((((.(((((..((....))..).)))).))))..).)).))))..)))))))))))))))))).)))))))))
		sbi-MIR6234.1-3	sbi-miR6234a-3p		Chr09	-	51013096..51013119	UUAGCGUCAAGAGACGAACACACU	UGUGUUCCUCUAUUUGAUGCUAAAG	Intronic	(((((((.(((.(((((((((((((((((((((((..((((.(((((..((....))..).)))).))))..).)))))))..)))))))))))))))))).)))))))))
		sbi-MIR6234.1-4	sbi-miR6234a-3p		Chr09	-	51023666..51023689	UUAGCGUCAAGAGACGAACACACU	UGUGUUCCUCUAUUUGACGCUAAAG	Intronic	(((((((.(((.(((((((((((((((((((((..(((.((.(((((..((....))..).)))).))..)))..))))))..)))))))))))))))))).)))))))))
		sbi-MIR6234.1-5	sbi-miR6234a-3p		Chr09	-	51021394..51021417	UUAGCGUCAAGAGACGAACACACU	UGUGUUCCUCUAUUUGACGCUAAAG	Intronic	(((((((.(((.((((((((((((((((((....)))...(((....)))(((((((((((((.......))))))))))))))))))))))))))))))).)))))))))
		sbi-MIR6234.1-6	sbi-miR6234a-3p		Chr09	-	51020624..51020647	UUAGCGUCAAGAGACGAACACACU	UGUGUUCCUCUAUUAGACGCUAAAG	Intronic	(((((((.(((....((((((((((((.((((((((...((.((((..((....))...)))).))...)).))))))...))))))))))))...))).)))))))))
		sbi-MIR6234.1-7	sbi-miR6234a-3p		Chr09	-	51012323..51012346	UUAGCGUCAAGAGACGAACACACU	UGUGUUCCUCUAUUUGACGCCAAAG	Intronic	(((((((.(((.((((((((.((((((((((((..(((.((.(((((..((....))..).)))).))..)))..))))))..)))))).))))))))))).)))))))))
-	sbi-novel-miR1	sbi-novel-MIR1-1	-	21	Chr04	-	50494252..50494272	AAAGCGGCUUAUAAUUUGGAA	CCAAAUUAUAAGUCGCUUUGA	Intronic	(((((((((((((((((((((((((((((((.((((.....((((.(((((((((............)))))).))).)))))))).)))))))))))))))))))))))))))))))))	Group I	28.0749	0	15.7792	0	0
-		sbi-novel-MIR1-2	-		Chr01	+	73239337..73239357	AAAGCGGCUUAUAAUUUGGAA	CUAAAUUAUAAAUUGUUUUGA	Intergenic	(((((((((((.((((((((((((..((((((((......((((((((((((.((((((((...)))))))).))))))))))))......)))))))))))))))))))).)))))))))))).
-	sbi-novel-miR2	sbi-novel-MIR2-1	-	21	Chr01	+	1326961..1326981	AAGAAGAAGCAAUUGAAAGUA	AAGAAGAAGCAAUUGAAAGUA	Intronic	(((((((((((((((((((((((((((((((((((((((((...((....))..))))))..))).))))............))))))))))))))))))))))))))))))	Group IV	0	0	0	43.636	0
-		sbi-novel-MIR2-2	-		Chr01	-	1327047..1327067	AAGAAGAAGCAAUUGAAAGUA	AAGAAGAAGCAAUUGAAAGUA	Intronic	((((((((((((((((((((((((((((............((((((...((((((((.((....))..))))))))))))))))))))))))))))))))))))))))))))
-	sbi-novel-miR3	sbi-novel-MIR3	-	21	Chr01	+	71955686..71955706	AAGGGAGGCUACGAAUAGACC	UCUAUUCACAGCCUCUCUUCC	Intronic	((((((((((..(((((((((((((((((((((((.................)))....(((.........))).....(((......))).......(((((((((....(((....(((.(......).)))....)))..)))))))))(((.......)))))))))))))))))))))))..))))))))))))	Group III	0	0	20.4173	0	0
-	sbi-novel-miR4	sbi-novel-MIR4-1	-	22	Chr02	-	30719759..30719780	AAGUUUGGGGCGAGGUGUGGUU	CUGCAGCUCCCCGAAGCUGCU	Intergenic	(((((.((((((.(((((...((((.(((.((((((..((((((..(((........))))))...(((..(((.(((((.......))))))))))).......((((.((((....)))))))).)))..))((((((...(.(((((((.........)))))))...)...)))))).))))..)))))))...))))).))).))).))))).)	Group V	0	0	0	0	80.2355
-		sbi-novel-MIR4-2	-		Chr09	-	44168850..44168871	AAGUUUGGGGCGAGGUGUGGUU	CUGCAGCUCCCCGAAGCUGCU	Intergenic	(((((.((((((.(((((...(((((((..((.((((((..(((((((..((((..(((......(((((((.(((...))))))))))......)))...).)))...)))))))..)))))).))...((.(((((((..((.(((((((.........))))))).))....))))))).)).)))..))))...))))).))).))).))))).)
-	sbi-novel-miR5	sbi-novel-MIR5	-	21	Chr02	+	65406473..65406493	ACAUUAGGGAAGAACCGCGGU	CGCGGUUCUUCUCUAGUGUAA	Intergenic	(((((((((((((((((((((.(.((((((((((((.((.((..............)).)))))))))))))).).)))))))))))))))))))))).	Group III	0	0	27.9722	0	0
-	sbi-novel-miR6	sbi-novel-MIR6	-	20	Chr04	-	9600988..9601007	AGAGUUGGAAGGAGGGUGUA	CGCCCCAUUCCGAAUCUAU	Intergenic	(((.((((((.(.(((((....(((....)))(((((.(((((((((.(((.(((......))).)))..)))))))))))))))))))).)))))).)))))	Group IV	0	0	19.2857	32.7449	0
-	sbi-novel-miR7	sbi-novel-MIR7	-	21	Chr09	-	58245045..58245065	AGCAAUGCGUCUAGAAAAGCC	CUUUUCUAGAUACAUAGCUUG	Intronic	(((((((((((.(((.((((.(((((((...((((((((.....))))))))...))))))).)))).))).)))))))))))).	Group IV	0	0	17.4528	20.4656	0
-	sbi-novel-miR8	sbi-novel-MIR8-1	-	21	Chr02	+	3116472..3116492	AACAAUGUAUCUAGAAAAGCC	CUUUUCUAGAUAUGUUGUUUU	Intronic	((((((((((((((((((((((((((((...(((((((((...))))))))).))))))))))))))))))))))))))))))	Group IV	0	0	54.8128	64.7505	0
-		sbi-novel-MIR8-2	-		Chr01	+	72018927..72018947	AACAAUGUAUCUAGAAAAGCC	CCUUUUUAGAUAUAUAGCUUU	Intronic	(.(((((((((((((.(.((((.(((((.(((((((((((...))))))))))).))))).)))).).))))))))))))).)..
-		sbi-novel-MIR8-3	-		Chr02	+	23932165..23932185	AACAAUGUAUCUAGAAAAGCC	CUUUUUUAGAUUCAUAGUUUU	Intronic	(((((((((((.(((.((((((((((((((((.(.(((((...)))))).)).)))))))))))))).))).)))))))))))))
-		sbi-novel-MIR8-4	-		Chr04	-	10351932..10351952	AACAAUGUAUCUAGAAAAGCC	CUUUUUUAGAUACAUAGUUUU	Intronic	(((((((((((((((.((((((((((((....((((((((...))))))))...)))))))))))).)))))))))))))))))
-		sbi-novel-MIR8-5	-		Chr01	-	81451584..81451604	AACAAUGUAUCUAGAAAAGCC	CUUUUCUGGAUACAUAAAACU	Intronic	(((((((((((((((.....(((((((((.....(((((((...))))))).....)))))))))....)))))))))))))))))
-		sbi-novel-MIR8-6	-		Chr06	+	41791417..41791437	AACAAUGUAUCUAGAAAAGCC	CUUUUUUAGGUUCAUAACUUU	Intronic	(((((((((((.(((...((((((((((((.(((((((((...))))))))).))))))))))))...))).))))))))))).)
-		sbi-novel-MIR8-7	-		Chr06	+	54049075..54049095	AACAAUGUAUCUAGAAAAGCC	CUUUUCUAGAUACACAUAGUUUU	Intronic	((((((((((((((....((((((((((((...(((((((((...)))))))))...))))))))))))..))))))))))))))))
-		sbi-novel-MIR8-8	-		Chr09	+	52825971..52825991	AACAAUGUAUCUAGAAAAGCC	CUUUUCUAGAUACAUAGCUUA	Intronic	(((((((((((((((.(.((..((((((............))))))..)).).)))))))))))))))))
-		sbi-novel-MIR8-9	-		Chr01	+	11060103..11060123	AACAAUGUAUCUAGAAAAGCC	CUUUUCAAGAUACAUAGUUUU	Intronic	((((((.((((((((.((((((((((((.((............)).)))))))))))).)))))))).))))))))
-		sbi-novel-MIR8-10	-		Chr10	+	7308325..7308345	AACAAUGUAUCUAGAAAAGCC	CUUUUCUAGAUACGUGCAUAG	Intronic	(((((((((((((((..............)))))))))))))))))
-		sbi-novel-MIR8-11	-		Chr02	+	77165396..77165416	AACAAUGUAUCUAGAAAAGCC	CUUUUUUAGAUGCAUAACCUUU	Intronic	(((((((((((((((....((((((((((((.(((((((((...))))))))).))))))))))))...)))))))))))))))))
-	sbi-novel-miR9	sbi-novel-MIR9	-	21	Chr06	-	56757007..56757027	AAGCGGUGGGGUUGGUGGUGA	ACCACCAACACCACCGCUUCU	CDS	(((((((((.((((((((((((((((...)).)).)))))))))))).)))))))))))	Group III	0	0	155.215	0	76.9856
-	sbi-novel-miR10	sbi-novel-MIR10-1	-	21	Chr03	+	10923794..10923814	AAGUCGAGUUUGGACAAGAUA	UCUUGUACAAACUCGAAUUCA	Intergenic	((((((.(((((((((.(((.((((((((((((((((((((.(((((((.......(((...))).((((....)))).))))))).)))))))))))))))))))).))).))))))))).))))))))	Group IV	0	0	59.4828	30.187	0
-		sbi-novel-MIR10-2	-		Chr04	-	52988243..52988263	AAGUCGAGUUUGGACAAGAUA	UCUUGUGCAAAAUCGAAUUUA	Intergenic	((((((.((((.((((.((((((((((((((((((((((((((((((((...((((...((....))...))).)....)))))))))))))))))))))))))))))))).)))).)))).))))))))
-	sbi-novel-miR11	sbi-novel-MIR11	-	21	Chr01	+	58838926..58838946	AAUCCAGAUGUGUUGGGGUGG	ACCCCAACACAUGUGGAUUGA	Intronic	((((((.(((((((((((((((((((.((((((.((......)))))))).))))))))))))))))))).))))))))	Group V	0	0	33.7421	26.5597	42.7864
-	sbi-novel-miR12	sbi-novel-MIR12	-	21	Chr10	-	153636..153656	AGAGUUGUCUUGAGUCAAACU	UUUGACAGACAUAGAUUCUUAG	3' UTR;Intergenic	((((((((((...(((((((((((((((.(((((.(((((((.(((........))))))))))..))))).....(((....))).....(((((.(((((....)))))..)))))..(((((..((((((((......))))))))))))))))).))))))))))))))))...)))).)))	Group IV	0	0	88.8294	9.374	0
-	sbi-novel-miR13	sbi-novel-MIR13-1	-	21	Chr03	+	15675463..15675483	ACACUAGAGAAGAACUGCGGG	UGUGGUUCUUUCUAGUGUAA	Intergenic	(((((((((((((((((((((..(((.((((((((.((.((..(........)..)).)))))))))).))).)))))))))))).)))))))))))	Group IV	0	0	51.0164	125.618	0
-		sbi-novel-MIR13-2	-		Chr01	+	74972344..74972364	ACACUAGAGAAGAACUGCGGG	CGUGGUUCUUCUCUAGUGUAA	Intronic	(((((((((((((((((((((((.((.(((((((((.((.((...............)).))))))))))).)).)))))))))))))))))))))))))
-		sbi-novel-MIR13-3	-		Chr04	+	16677850..16677870	ACACUAGAGAAGAACUGCGGG	CAUGGUUUUUCUCUAGUGUAA	Intergenic	(.(((((((((((((((((((...(((((((((((((((...................)))))))))))))))...))))))))))))))))))).)))
-		sbi-novel-MIR13-4	-		Chr07	+	57180696..57180716	ACACUAGAGAAGAACUGCGGG	CGCGGUUCUUCUUUAGUGUAA	Intronic	(((((((((((((((((((((...(((((((((((((((...(((..........))).)))))))))))))))...)))))))))))))))))))))))
-		sbi-novel-MIR13-5	-		Chr09	-	51226678..51226698	ACACUAGAGAAGAACUGCGGG	UGUGGUUUUUUUCUAGUGUAA	Intronic	((((((((((((((((((((((((((((((((((((((((.....))))))))))))))))))))))))))))))))))))))))))
-		sbi-novel-MIR13-6	-		Chr10	+	46252818..46252838	ACACUAGAGAAGAACUGCGGG	UGCGGUUCUUCUCUAGUGUAA	Intergenic	(((((((((((((((((((((((.((((((..(((.(((............))).))).)))))).)))))))))))))))))))))))))
-	sbi-novel-miR14	sbi-novel-MIR14	-	24	Chr10	+	58472848..58472871	ACAUAUGACUUGGAGAUAUUAGUG	UGAAUGCUCCAUUAGUUGUAAGUCU	Intronic	((.((((((((((((.((((..(((((..(((.....))).)))))............)))))))))..))))))).))..	Group IV	0	0	2262.95	854.225	0
-	sbi-novel-miR15	sbi-novel-MIR15	-	21	Chr04	-	49534212..49534232	ACAUGCUGAUUUGUCUUUUGU	AAAAGACAAAUCAGCAUGUCA	Intronic	(((((((((((((((((((((((((((((((((((((.(((.......))).)))))).))))).......)))))))))))))))))))))))))).)	Group III	104.231	139.464	567.351	164.53	40.0365
-	sbi-novel-miR16	sbi-novel-MIR16-1	-	21	Chr04	-	47842727..47842747	AGCAAUGUGUCUAGAAAAGCC	CUUUUCUAGAUACAUAGCUUG	Intronic	(((((((((((((((.((((.(((((((...(((((((((...)))))))))...))))))).)))).)))))))))))))))))	Group IV	0	0	30.9209	59.7436	20.3745
-		sbi-novel-MIR16-2	-		Chr01	-	27592000..27592020	AGCAAUGUGUCUAGAAAAGCC	CUUUUCUAGAUAUGUAACUUU	Intronic	(((((((((((((((..(((((((((((...(((((((((...)))))))))...)))))))))))..)))))))))))))))))
-	sbi-novel-miR17	sbi-novel-MIR17-1	-	21	Chr09	+	62524202..62524222	AGCAAUUCGUCGAACAGCUUG	AGCUGUUCGACGAAUGCCUCC	3' UTR	((..(((((((((((((((.((((((.((((.(((((...))))).))...))..))).))).)))))))))))))))..))))	Group II	28549.6	31880.3	14777.1	12321.1	12992.7
-		sbi-novel-MIR17-2	-		Chr10	-	12130930..12130950	AGCAAUUCGUCGAACAGCUUG	GGCUGGCGAUGACGCGCUCC	CDS	(((...((((((..(((((...((((((..(((((((....)))))..))..))))))))))).))))))...)))))
-	sbi-novel-miR18	sbi-novel-MIR18	-	21	Chr01	-	81433330..81433350	AGCAGUCAUAGAGAUAGAGAU	CUCUUAUCUGUAUCAUUGCUGA	Intronic	.(((((.(((.((((((((((((.........((((((.............)))))).....((((...((((..(((....(((.(((((((((........)))..........))).))))))...)))..))))....))))(((((.((((......)))).)))))......))))))).))))).))).))))))))	Group V	0	0	0	130.031	57.0486
-	sbi-novel-miR19	sbi-novel-MIR19	-	21	Chr01	+	7646061..7646081	AGCCAUGUAUCUAGAAAAGCC	CUUUACUAGAUACAUAGCUUU	Intronic	((((.((((((((((.(((((.((((.(...((((((....))))))...).)))).))))).)))))))))).))))))	Group III	0	0	23.9238	0	0
-	sbi-novel-miR20	sbi-novel-MIR20-1	-	21	Chr01	-	12927350..12927370	AGCGCGCCGCCGUCGAGCGUU	CGCUCGCCGGUGCACGCGCUCG	Intergenic	((((((.(((((..(((((((((.....)).))))))).))))).)))))).)	Group IV	0	0	23.2704	110.223	0
-		sbi-novel-MIR20-2	-		Chr03	+	66577421..66577441	AGCGCGCCGCCGUCGAGCGUU	CGCUCGCCGGUGCGCGCGCUCG	Intergenic	((((((.(((((.((((((((((.....)).))))))))))))).)))))).)
-	sbi-novel-miR21	sbi-novel-MIR21-1	-	21	Chr01	+	15029839..15029859	AGGAUGGAGUGUCUCAUGGCC	AGGAUGGAGUGUCUCAUGGCC	Intergenic	.((((((((((.(((((((.((...((.(((((..((.....))))))).))..)).))))))))))))))))).))	Group IV	0	0	0	58.2265	0
-		sbi-novel-MIR21-2	-		Chr02	+	46865900..46865920	AGGAUGGAGUGUCUCAUGGCC	AGGAUGGAGUGUCUCAUGGCC	Intergenic	.((((((((((.(((((((.((.(.((.(((((..((.....))))))).)).))).))))))))))))))))).))
-		sbi-novel-MIR21-3	-		Chr01	+	64095595..64095615	AGGAUGGAGUGUCUCAUGGCC	AGGAUGGAGUGUCUCAUGGCC	Intergenic	(((((((((((.(((((((.((...((.((((.((.......))..)))).))..)).))))))))))))))))))))
-		sbi-novel-MIR21-4	-		Chr04	-	44901056..44901076	AGGAUGGAGUGUCUCAUGGCC	AGGAUGGAGUGUCUCAUGGCC	Intergenic	(((((((((((.(((((((.((...((.(((((...((.....))))))).))..)).))))))))))))))))))))
-		sbi-novel-MIR21-5	-		Chr08	-	19169034..19169054	AGGAUGGAGUGUCUCAUGGCC	AGGAUGGAGUGUCUCAUGGCC	Intergenic	.((((((((((.((.((((.((...((.(((((...(((...)))))))).))..)).)))).)))))))))))).))
-		sbi-novel-MIR21-6	-		Chr09	+	45877015..45877035	AGGAUGGAGUGUCUCAUGGCC	AGGAUGGAGUGUCUCAUGGCC	Intergenic	(((((((((((.(((((((.((..((....((.((..........))))....)))).))))))))))))))))))))
-	sbi-novel-miR22	sbi-novel-MIR22-1	-	22	Chr02	-	77457022..77457043	AGGAUGGAUGUAUCUCAUGGCC	ACAUGGGAUACAUCCAUCCCCA	Intergenic	.((((((((((((((((((.((...((.(((((...(((...)))))))).))..)).)))))))))))))))))).))	Group I	39.7728	0	0	7.81167	0
-		sbi-novel-MIR22-2	-		Chr03	-	58403123..58403144	AGGAUGGAUGUAUCUCAUGGCC	ACAUGAGAUACAUCCAUCCCCA	Intergenic	.((((((((((((((((((.((...((.((((((((.....))).))))).))..)).))))))))))))))))))...
-		sbi-novel-MIR22-3	-		Chr03	+	57818842..57818863	AGGAUGGAUGUAUCUCAUGGCC	ACAUGAGAUACAUCCAUCCCCA	Intergenic	.((((((((((((((((((.((...((.(((....((((...)))).))).))..)).)))))))))))))))))).))
-		sbi-novel-MIR22-4	-		Chr04	+	3283534..3283555	AGGAUGGAUGUAUCUCAUGGCC	ACAUGAGAUACAUCCAUCCACA	Intergenic	.((((((((((((((((((......((.(((((...(((...)))))))).)).....)))))))))))))))))).))
-		sbi-novel-MIR22-5	-		Chr07	+	57246727..57246748	AGGAUGGAUGUAUCUCAUGGCC	ACAUGAGAUACAUCCAUCCCCA	Intergenic	.((((((((((((((((((.((..((....((((.......))))........)))).)))))))))))))))))).))
-		sbi-novel-MIR22-6	-		Chr10	+	13847372..13847393	AGGAUGGAUGUAUCUCAUGGCC	ACAUGAGAUACAUUCAUCCCCA	Intergenic	.((((((((((((((((((.((...((.(((((...(((...)))))))).))..)).)))))))))))))))))).))
-	sbi-novel-miR23	sbi-novel-MIR23	-	21	Chr04	+	65952266..65952286	AGGAUGGCGUAUCCCAUGGCC	ACAUGGGAUACGUCCAUCCCCA	Intergenic	.(((((((((((.((((((.((...((.(((((((........))))))).))..)).))))))))))))))))).))	Group IV	0	0	126.134	284.255	0
-	sbi-novel-miR24	sbi-novel-MIR24-1	-	21	Chr02	+	74870224..74870244	AGGAUGGCGUGUCUCAUGGCC	ACAUGAGAUACGUCCAUCCCCA	Intergenic	.(((((((((((.((((((.((...((.(((((((........))))))).))..)).))))))))))))))))).))	Group IV	0	0	66.3761	70.7708	0
-		sbi-novel-MIR24-2	-		Chr10	+	42748471..42748491	AGGAUGGCGUGUCUCAUGGCC	ACAUGAGAUACGUCCAUCCCCA	Intergenic	.(((((((((((.((((((.((...((.(((((.((((((....))))))..))))).))..)).))))))))))))))))).))
-	sbi-novel-miR25	sbi-novel-MIR25	-	21	Chr06	-	6385925..6385945	AGGUGCAGGGGCAGAUGCAGU	UGCAUUUGCACCUGCACCUCC	Intergenic	(((((((((.(((((((((..((((((.((....(((..(((((.((((.(((((((((...)))))))....)).)))).)))))))).)).))))))..))))))))).)))))))))))	Group IV	0	9.00959	26.761	120.062	0
-	sbi-novel-miR26	sbi-novel-MIR26-1	-	21	Chr01	-	17633852..17633872	AUAAGACGAGUGGUCAAACCU	GUUUGAUCACUCGUCUUAUUC	Intergenic	(((((((((((((((((((((((((.......((((((((.......(((..(((((...((((...(((......)))...))))..)))))..))).......))))))))........))))))))))))))))))))))))).)	Group IV	0	0	31.5584	48.652	0
-		sbi-novel-MIR26-2	-		Chr01	+	61295101..61295121	AUAAGACGAGUGGUCAAACCU	GUUUGACCACUUGUCUUAUUC	Intronic	((((((((((((((((((((((((((((((((((((((((((....((..(((((..(((((..................))))).)))))..))...))).))).))))))).))))))))))))))))))))))))))))).)
-	sbi-novel-miR27	sbi-novel-MIR27	-	21	Chr01	+	7908756..7908776	AUAAGUCGAGUGGUCAAACUU	GUUUGACCACUCGUCUUAUUC	Intergenic	(((((((((((((.(((((((((((......((((((..........))))))((((((.((((.....(((..(((((.((....)).)))))..))).....)))).))))))....))))))))))).)))))))))))))))	Group V	0	0	24.5454	14.3259	32.5992
-	sbi-novel-miR28	sbi-novel-MIR28	-	21	Chr03	+	6489792..6489812	AUCAUGCGAUCCUUUUGGAGG	UCCAAAGGGAUCGCAUUGAUCC	Intergenic	((((((((((((((((.((((((((.......((((((......)))))).((..((((....))))..)).....)))))))))))))))))))))))).)	Group III	0	1157.85	303.502	0	0
-	sbi-novel-miR29	sbi-novel-MIR29-1	-	21	Chr09	+	60928554..60928574	AUCCAAGUGGAAUGGAGGGGA	CCCUCCAUUCCACUUGGAUUG	Intronic	(((((((((((((((((((((((((((((((((((...)))))))))))))))))))))))))))))))))))))	Group V	0	0	0	50.9271	57.936
-		sbi-novel-MIR29-2	-		Chr09	-	60928603..60928623	AUCCAAGUGGAAUGGAGGGGA	CCCUCCAUUCCACUUGGAUUG	Intronic	((((((((((((((((((((((((((((((((((.....))))))))))))))))))))))))))))))))))).
-	sbi-novel-miR30	sbi-novel-MIR30	-	22	Chr01	+	2732218..2732239	AUCCGUUGUAGUCUAGCUGGUU	UUUUAGCCUGAUGACAAUUGACAA	Intergenic	.((.(((((.(((..(((((..((((.(((((((((((....)))))..))))))..(((..(((....)))...)))....................)))).....)))))..))).))))).))...	Group IV	0	0	33.9381	26.8981	0
-	sbi-novel-miR31	sbi-novel-MIR31	-	24	Chr09	-	52167459..52167482	AUCGUGCUGAUAACGUGUUGUGAU	UGCAACACGUUACAACAUGAUAA	Intronic	((((((((((((((.((((((((((((((((((.(.(((....))).).))................(((((((((.....)))))))))..)))))))))))))))).)).))))))))))))))	Group III	0	0	449.679	0	278.443
-	sbi-novel-miR32	sbi-novel-MIR32-1	-	21	Chr02	-	71880027..71880047	AUCUAUGUAUCUAGAAAAGUC	CCUUUGUAGAUAUAUUGAUUU	3' UTR	(.(((.(((((((((.(((((..((((.......))))..))))).))))))))).))).)).	Group IV	96.2172	132.175	160.29	190.597	81.5604
-		sbi-novel-MIR32-2	-		Chr04	+	49121008..49121028	AUCUAUGUAUCUAGAAAAGUC	CUUUUCUAGAUACAUUGCAUU	Intronic	(((((((((((((((.(..((((((((((((.((...(((.....))).)).))))))))))))..).)))))))))))))))))
-		sbi-novel-MIR32-3	-		Chr01	-	74687720..74687740	AUCUAUGUAUCUAGAAAAGUC	CUUUUCUAGAUACAUAGCUUU	Intronic	(((((((((((((((((.((((((((((((((((((.......)))))))))))))))))).)))))))))))))))))))
-	sbi-novel-miR33	sbi-novel-MIR33-1	-	22	Chr01	-	10337280..10337301	AUUUCAAAUUAUAAGUCGUUUU	AAUAAUUUAUAAUUUGGAACAA	Intergenic	.(((((((((((((((.(((((((((((((((.(((((((((((.......))))))))))).))))))))))))))).)))))))))))))))..)	Group III	0	0	43.7673	0	0
-		sbi-novel-MIR33-2	-		Chr10	-	61581457..61581478	AUUUCAAAUUAUAAGUCGUUUU	AGCAGCUUAUAUCAGAAAUCA	Intergenic	(((((....(((((((.((((((.((((............(((((.(((((((((.....))))))))).))))).........((((((.(((...(((((....)))))))).))))))......)))).)))))).)))))))...)))))))
-	sbi-novel-miR34	sbi-novel-MIR34	-	21	Chr06	+	43958767..43958787	AUUUCAGAUUUCUCGUCACAU	GUGACGGAGAAUCUGAAAAAU	Intergenic	(((((((.((((((((((.((((((((((((((((.((((....))))..)))))))))))))))).)))))))))).)))))))))	Group III	0	0	130.742	0	0
-	sbi-novel-miR35	sbi-novel-MIR35-1	-	21	Chr03	-	74225607..74225627	AUUUGAAGAGAUUUGAGUUCA	AACUCAAAUCUCUUCAAAUUC	Intergenic	(((((((((((((((((((((((((((((((((((((((((((........((((.((....)).))))((((((..(((((...))))).))).)))(((.((((.(((..((.((.........)).)).))))))).)))))))))))))))))))))))))))))))))))))))))))))).)	Group III	0	0	121.146	0	0
-		sbi-novel-MIR35-2	-		Chr03	-	66752810..66752830	AUUUGAAGAGAUUUGAGUUCA	AACUCAAAUCUCUUCAAAUUC	Intronic	((((((((((((((((((((((((((((((((((((.((((......(((....((((.((.((.(((((.((....)).))..))).)).)).)))))))((((((((........))))))))(((((((....)))))))........)))).)))))))))))))))))))))))))))))))))))).)
-		sbi-novel-MIR35-3	-		Chr03	-	13844213..13844233	AUUUGAAGAGAUUUGAGUUCA	AACUCAAAUAUCUUCAAAUUC	Intergenic	(((((((((.((((((((((.(((((....)))))............((((...))))(((((((((((((((..((((((.((((((.(((.((....))))).))))))))))))..))...))).)))))))))).((((((..((.....))...))))))((((((((....)))))))).........)))))))))).)))))))))))
-		sbi-novel-MIR35-4	-		Chr09	-	58150771..58150791	AUUUGAAGAGAUUUGAGUUCA	AACUCAAAUCUUUUCAAAUCA	Intergenic	(((((((((((((((((((((((((((.....((((.((....)).))))((((((...((((.(((....)))....))))...))))))...)))))))).....((((.(((.((((...)))).)))))))..(((((((....))))))))))))))))))))))))))))
-	sbi-novel-miR36	sbi-novel-MIR36-1	-	21	Chr02	+	72247878..72247898	CAAAAAUCAUGUAUGUAGUAC	AUUGCAUACAUGUCUUUGUG	Intronic	((((...((((((((((((((((....((((((((..(((.((((((((((.(((((((.((((........((((((((((((((..........(((.(((((....(((.((.....))))).))))).)))..))))))))).)))))...........))))))))))).)))))))))).)))..))))))))....))))))))))))))))..))))))	Group II	0	34.6254	17.4528	0	17.6246
-		sbi-novel-MIR36-2	-		Chr02	+	52077514..52077534	CAAAAAUCAUGUAUGUAGUAC	ACUACAUACAUGGUUUUGUG	Intronic	(((((.(((((((((((((((((.(((((((.(.(((((((((((((((((((((..(((((((((((..(((((((((..((((((((((..((.((((((((........)).)))))).))..))(((.....))))))))))).)))))))))..))))))))))).))))))))))))))))))))).).))))))).))))))))))))))))))))))))
-		sbi-novel-MIR36-3	-		Chr01	-	8826850..8826870	CAAAAAUCAUGUAUGUAGUAC	ACUAGAUACAUGAUUUCGUGAU	Intronic	((.(((((((((((.((((((((..((((((((((.(((..(((........(((((((((.((((((..(.(((((((..........(((((((..(.(((..(((((.(.((((.......))))))))))..)..)).)..)))))))))))))).)..)))))).))))))))))))..))).)))))))))))))))))).)))))))))))..))).
-		sbi-novel-MIR36-4	-		Chr01	-	8780561..8780581	CAAAAAUCAUGUAUGUAGUAC	ACUAGAUACAUGAUUUCGUGAU	Intronic	((.(((((((((((.((((((((..((((((((((.(((..(((........(((((((((.((((((..(.(((((((...........(((((((..(.(((..(((((.(.((((.......))))))))))..)..)).)..)))))))))))))).)..)))))).))))))))))))..))).)))))))))))))))))).)))))))))))..))).
-	sbi-novel-miR37	sbi-novel-MIR37	-	21	Chr02	+	62335860..62335880	CAAACUUAGUCUGGAUACUAC	AGUGUUCAGAUUGAGUUUAGA	Intronic	.(((((((((((((((((((((((..(((((..(((((((....)))))))..)))))...))))))))))))))))))))))).))	Group II	49.6836	57.6614	0	0	0
-	sbi-novel-miR38	sbi-novel-MIR38	-	21	Chr08	-	64377729..64377749	CAAGACGACUUAUAAUUUGGG	CAAAUUAUAGGCCGUUUUGCC	Intronic	(((((((((((.(((((((.((.(((.((((((.(((...))).)))))).))).)).))))))).)))))))))).))	Group III	0	0	79.7843	25.7101	8.14979
-	sbi-novel-miR39	sbi-novel-MIR39	-	20	Chr04	+	5247265..5247284	CACGCGGCUCCGUCGAGCGG	CCUCGCCGGGGCACGCGUGCG	5' UTR	.((((.((((((.(((((((((((.......)).))))))))))))))).)))).))	Group III	35.0936	0	254.273	30.6984	0
-	sbi-novel-miR40	sbi-novel-MIR40	-	21	Chr05	-	59939611..59939631	CAGGCGGUCGACUUAAGCCAA	GGCUUAAGUCCACCGCCUGUG	Intergenic	((((((((.(((((((((((((((((((((((((((...))))))))))))))))))))))))))).))))))))))	Group III	0	0	21.0773	0	0
-	sbi-novel-miR41	sbi-novel-MIR41	-	20	Chr09	-	59271617..59271636	CCACCCAUAUUCCGAGUCCG	GACUGGGGAUUUGAGAGCAU	Intergenic	((((.(((((.((.(.(.(((((((((((((..(((((...(((((.......)))))...)))))((((..((((......))))))))))))))....)))))))...).).)).))))).))))))	Group I	91.188	79.8167	40.3015	14.061	0
-	sbi-novel-miR42	sbi-novel-MIR42	-	21	Chr05	-	38847408..38847428	CCCCACGUCGCAUGGAUUCGU	CAGUUCGGCAAGGCGUGAGUGCC	Intergenic	((.((((((((.((((((.((.................((((((((.....))))).)))(((((((............(((.....)))...(((....)))((((((((..(((......)))...........(((((..((....)).)))))(((((.....)))))))))))))..))))))).......))))))))))..)))))).).)).	Group IV	0	0	12.7268	28.5793	0
-	sbi-novel-miR43	sbi-novel-MIR43	-	21	Chr05	+	10641985..10642005	CCGUCCCCCAUUGUGUGUCGU	GACGGACAUUGGGGGACAGAG	Intronic	(.((((((((.(((.(((((((.((((...(((((((.(((...((((((.................(((((((...............)))))))))))))..))).))..........)))))...).))).))))))).))).)))))))).)))	Group III	30.4145	32.803	35.8868	0	0
-	sbi-novel-miR44	sbi-novel-MIR44	-	22	Chr02	+	18993205..18993226	CCGUGAGACACGUCCAUUCCCA	GGAUGGACGUGUCUCACGCUU	Intergenic	.((((((((((((((((.((((.(((.((((((((....).))))))).))).)))))))))))))))))))).))	Group IV	0	0	1252.93	2119.38	37.0116
-	sbi-novel-miR45	sbi-novel-MIR45	-	21	Chr06	+	31213497..31213517	CGACCCCUACCUGGCGCGCCA	AGGCGUCAGAAUAGGAGUCGAU	Intergenic	((((.((((.(((((((....(((((..(((....)))))).))....)))))))..)))).))))).	Group V	0	0	0	0	38.274
-	sbi-novel-miR46	sbi-novel-MIR46-1	-	21	Chr01	+	11137385..11137405	CGCGCGGCACCGUCGAGUGGC	CGCGCGGCACCGUCGAGUGGC	Intergenic	(.((((.(((.((.((((((((((....)))))))))))).))).)))).)))	Group IV	0	0	0	32.5989	0
-		sbi-novel-MIR46-2	-		Chr05	+	56187676..56187696	CGCGCGGCACCGUCGAGUGGC	CGCGCGGCACCGUCGAGUGGC	Intergenic	(.((((.(((.((.(((((((((((.(.((((....))))).).)))))))))))).))).)))).)))
-	sbi-novel-miR47	sbi-novel-MIR47	-	21	Chr10	-	2910353..2910373	CGCGGCUCCGUCGAGGGGAUC	UCCUCUCGCCGAAGCACGCGCG	5' UTR	((((((((.((.(((.((((.(((((....))))).))))))).)).)))))))).)	Group IV	0	0	163.541	162.693	0
-	sbi-novel-miR48	sbi-novel-MIR48	-	21	Chr08	-	6127647..6127667	CGGUUUUGAAAGUUCAGGGAG	CCUUGAUCCUUCAUAACAAGGU	Intergenic	(.(((.((((.(.((((((.....(((((((........(((((((((((.(((((.((((((((((((...)))))))....)))))))))).))))......((((.(((.....))).))))..((((......))))......)))))))........)))))))....)))))).).)))).)))..)))	Group V	0	0	17.5324	42.183	312.092
-	sbi-novel-miR49	sbi-novel-MIR49-1	-	24	Chr09	+	63003212..63003235	CGGUUUUUUUGCCCUUAAGGGCAU	GCCCUCAAGGGCAAAGAAAACUUUA	Intronic;3' UTR	.(((((((((((((((.(((((((.((((((((((((((.((((((((((((((.(((((((((((((((((((((((.((((....)))).)))))))))))))))))))))))..)))))))))))))).)))))))))))))).))))))).)))))).)))))))))...	Group I	2210.07	0	0	0	0
-		sbi-novel-MIR49-2	-		Chr03	-	75073288..75073311	CGGUUUUUUUGCCCUUAAGGGCAU	GCCCUCAAGGGCAAAAUAAACUUUG	Intergenic	.(((((((((((((((.(((((((.(((((((((((((((((((((((((((((((((((((((((((((((((((((((((((.((......)).))))))))))))))))))))))))))))))))))))))))))))))))))))))))))).))))))).)))))))))).))))).))
-	sbi-novel-miR50	sbi-novel-MIR50	-	21	Chr05	+	10641986..10642006	CGUCCCCCAUUGUGUGUCGUU	CGACGGACAUUGGGGGACAGA	Intronic	.((((((((.(((.(((((((.((((...(((((((.(((...((((((.................(((((((...............)))))))))))))..))).))..........)))))...).))).))))))).))).)))))))).))	Group IV	0	0	30.2515	120.711	0
-	sbi-novel-miR51	sbi-novel-MIR51	-	22	Chr09	-	5103452..5103473	CGUCGGCGUGCGCGUUCGCUUG	GGUGAACGCGCCACCGUCGAG	Intergenic	((.(((.(.(((((((((((....)))))))))))).))).))))	Group IV	0	0	10.6056	6.24934	0
-	sbi-novel-miR52	sbi-novel-MIR52-1	-	21	Chr03	-	1240223..1240243	CUAAAAGGCUUGUGAAAGGAG	CCUUUCACAAGCCUUUUAGUG	Intronic	((((((((((((((((((((((((((((...(((........)))....))))))))))))))))))))))))))))))	Group IV	0	0	27.6466	31.9958	16.2996
-		sbi-novel-MIR52-2	-		Chr03	+	1240170..1240190	CUAAAAGGCUUGUGAAAGGAG	CCUUUCACAAGCCUUUUAGUG	Intronic	((((((((((((((((((((((((((((.((.((((......)))).))))))))))))))))))))))))))))))))
-	sbi-novel-miR53	sbi-novel-MIR53	-	22	Chr02	+	45748526..45748547	CUAUAACGACGUCGCCCGCAAC	CCCGGGUCGUCGUCGUUAUCGCC	Intergenic	..(((((((((.((((((..(((.((((((.....)))))).))).((........)))))).)).))))))))).)))	Group IV	0	0	0	27.6289	0
-	sbi-novel-miR54	sbi-novel-MIR54	-	20	Chr01	-	34121704..34121723	CUCACGUCGCACGGAUUCGU	AAGUUCGGCAUGGCGAGAG	Intergenic	(((.(((.((.((((((..((.....(((((.....(((((((((.....))))).))))...(((........)))..(((((........))))).((.(((((((((..(((......)))...........(((((...((....)))))))(((((.....)))))))))))))))))))))......))..)))))))))))..))).)	Group IV	0	0	38.5713	105.791	0
-	sbi-novel-miR55	sbi-novel-MIR55	-	21	Chr06	-	55394891..55394911	CUCUGUCCCAAAAUGAGUGUC	CACUCUUUUUGGGAUGGAGGG	Intronic	(((((((((((((.(((((((.((((((((.................)))))))).))))))).)))))))))))))))	Group IV	0	0	28.5779	6.24934	0
-	sbi-novel-miR56	sbi-novel-MIR56	-	21	Chr04	-	44900847..44900867	CUGAAGCUCUUCAAUGUCGCA	CGGCAUGGAAGACCUUCCAUC	Intergenic	((((((.(((((.((((....((((....))))....)))).))))).))))))))	Group I	998.758	817.415	803.369	616.2	271.168
-	sbi-novel-miR57	sbi-novel-MIR57-1	-	21	Chr02	-	77456799..77456819	CUGAAGUUCUUCAAUGCCGCA	CGGCAUGGAAGAACUUCCAUU	Intergenic	((((((.((((((((((..((((((....))))))..)))))))))).))))))))	Group III	0	0	148.23	145.59	68.6733
-		sbi-novel-MIR57-2	-		Chr03	-	58402902..58402922	CUGAAGUUCUUCAAUGCCGCA	CGGCAUGGAAGAACUUCCAUU	Intergenic	((((((.((((((((((..((((.......))))...)))))))))).))))))))
-		sbi-novel-MIR57-3	-		Chr06	-	3665279..3665299	CUGAAGUUCUUCAAUGCCGCA	CUGCAUGGAAGAACUUCCAUU	Intergenic	(.((((.((((((((((..((((((....))))))..)))))))))).)))).)))
-		sbi-novel-MIR57-4	-		Chr07	-	12819992..12820012	CUGAAGUUCUUCAAUGCCGCA	CGGCAUGGAAGAACUUCCAUU	Intergenic	((((((.((((((((((..(((((......)))))..)))))))))).))))))))
-	sbi-novel-miR58	sbi-novel-MIR58	-	21	Chr06	-	56757008..56757028	GAAGCGGUGGGGUUGGUGGUG	GAAGCGGUGGGGUUGGUGGUG	CDS	((((((((.((((((((((((((((...)).)).)))))))))))).))))))))))	Group I	217.82	0	0	122.575	0
-	sbi-novel-miR59	sbi-novel-MIR59-1	-	22	Chr01	-	9533308..9533329	GAAUGUGAUAGUGAGUUGGCCU	GCCAGCUCACUACACAUUCUU	Intergenic	(((((((.((((((((((((((((((((((((......))))))).)))).))))))))))))))))))))))	Group IV	0	0	65.9379	56.5825	0
-		sbi-novel-MIR59-2	-		Chr01	+	64082572..64082593	GAAUGUGAUAGUGAGUUGGCCU	GUCAGCUCACUACACAUUCUU	Intergenic	(((((((.(((((((((((((.((((((((((......))))))).)).).))))))))))))))))))))))
-		sbi-novel-MIR59-3	-		Chr01	+	5662867..5662888	GAAUGUGAUAGUGAGUUGGCCU	GCCAGCUCACUUCACAUACUU	Intergenic	(.((((((.(((((((((((((((((((((((......))))))).)))).)))))))))))))))))).)))
-		sbi-novel-MIR59-4	-		Chr01	+	76131612..76131633	GAAUGUGAUAGUGAGUUGGCCU	GCCAGCUCACUACAUAUUCUU	3' UTR	(((((((.((((((((((((((((((((((((......))))))).)))).))))))))))))))))))))))
-		sbi-novel-MIR59-5	-		Chr02	+	55703958..55703979	GAAUGUGAUAGUGAGUUGGCCU	GCUAGCUCACUACACAUUCUU	Intergenic	(((((((.(((((((((((((.((((((((((......))))))).)).).))))))))))))))))))))))
-		sbi-novel-MIR59-6	-		Chr03	-	58403601..58403622	GAAUGUGAUAGUGAGUUGGCCU	GCCAGCUCACUACACAUUCUU	Intergenic	(((((((.((((((((((((((((((((((((......))))))).)))).))))))))))))))))))))))
-		sbi-novel-MIR59-7	-		Chr05	+	56471173..56471194	GAAUGUGAUAGUGAGUUGGCCU	GCCAGCUCACUUCACAUUCUU	Intergenic	((((((((.(((((((((((((((((((((((......))))))).)))).))))))))))))))))))))))
-		sbi-novel-MIR59-8	-		Chr06	-	3665991..3666012	GAAUGUGAUAGUGAGUUGGCCU	GCCAACUCACUACACAUUCUU	Intergenic	(((((((.((((((((((((((((((((((((......))))))).)))).))))))))))))))))))))))
-		sbi-novel-MIR59-9	-		Chr07	-	12820616..12820637	GAAUGUGAUAGUGAGUUGGCCU	GCCAGCUCACUACACAUUCUU	Intergenic	(((((((.((((((((((((((((((((((((......))))))).)))).))))))))))))))))))))))
-		sbi-novel-MIR59-10	-		Chr09	-	51316019..51316040	GAAUGUGAUAGUGAGUUGGCCU	GCCAGCUCACUACACAUUCUU	Intergenic	(((((((.((((((((((((((((((((((((......))))))).)))).))))))))))))))))))))))
-		sbi-novel-MIR59-11	-		Chr10	+	13846880..13846901	GAAUGUGAUAGUGAGUUGGCCU	GCCAGCUCACUACACAUUAUU	Intergenic	.((((((.(((((((((((((..(((((((((......)))))))))....)))))))))))))))))))...
-	sbi-novel-miR60	sbi-novel-MIR60-1	-	21	Chr01	+	81260077..81260097	GACCAGAUCGUAUGCCGUGGG	UGCAGCAUACGACCUAGUCAU	Intronic	(((.((((((((.((.(((((.(((((.(((((((((((.((((((((....(((((((((((.((((((..(((..........))).))))))..)))))).......)))))....)))))))).))))))))))).))))).))))).)).)))))))).)))))	Group I	106.183	104.511	73.8947	9.374	0
-		sbi-novel-MIR60-2	-		Chr02	-	7462944..7462964	GACCAGAUCGUAUGCCGUGGG	CGCAGCAUACGACCUGGUCAU	Intergenic	(((.((((((((.((((((((.(((((.(((((((.(((.((((((((....(((((((((((.((((((..(((..........))).))))))..)))))).......)))))....)))))))).))).))))))).))))).)))))))).)))))))).)))))
-		sbi-novel-MIR60-3	-		Chr02	+	51358142..51358162	GACCAGAUCGUAUGCCGUGGG	CGCAGCAUACGACCUGGUCAU	Intergenic	(((.((((((((.((((((((.((((..(((((((((((.((((((((....(((..((((...((.(((((.(((........((.......)).....))).))))))))))).))))))))))).)))))))))))..)))).)))))))).)))))))).)))))
-		sbi-novel-MIR60-4	-		Chr02	+	71958306..71958326	GACCAGAUCGUAUGCCGUGGG	CGCAGCAUACGACCUUGUCAU	Intergenic	(((.((((((((.((.(((((((((((.(((((((((((.((((((((....(((((((((((.((((((..(((..........))).))))))..)))))).......)))))....)))))))).))))))))))).))))))))))).)).)))))))).)))))
-		sbi-novel-MIR60-5	-		Chr03	+	53065941..53065961	GACCAGAUCGUAUGCCGUGGG	CGCAGCAUACGACCUGGUCAU	Intergenic	(((.((((((((.((((((((.(((((.(((((((.(((.((((((((((((......)))).................(((((((.(((....(((....)))...))).)))).))))))))))).))).))))))).))))).)))))))).)))))))).)))))
-		sbi-novel-MIR60-6	-		Chr05	-	59514064..59514084	GACCAGAUCGUAUGCCGUGGG	CGUAGCAUACGACCUGGUCAU	Intronic;CDS;Intergenic	((..((((((((.((((((((.(((((.(((((((((((.((((((((....(((((......(.(((((((.(.(((.(((...)))..))).).).)))))).)....)))))....)))))))).))))))))))).))))).)))))))).))))))))..))))
-		sbi-novel-MIR60-7	-		Chr07	-	12569260..12569280	GACCAGAUCGUAUGCCGUGGG	CGCAGCAUACAACCUGGUCAU	Intergenic	(((.((((((...((((((((.(((((.(((((((.(((.((((((((....(((((((((((.((((((..(((..........))).))))))..)))))).......)))))....)))))))).))).))))))).))))).))))))))...)))))).)))))
-		sbi-novel-MIR60-8	-		Chr02	-	78667219..78667239	GACCAGAUCGUAUGCCGUGGG	CGCAGCAUACGACCUGGUCAU	Intergenic	(((.((((((((.((((((((((((((.((((((((((..((((((((....(((((((((((.((((((..(((..........))).))))))..)))))).......)))))....))))))))..)))))))))).)))))))))))))).)))))))).)))))
-		sbi-novel-MIR60-9	-		Chr01	-	17964463..17964483	GACCAGAUCGUAUGCCGUGGG	CGCAGCAUACGACCUGGUCAU	Intronic	(((.((((((((.((((((((.(((((.(((((((((((.((((((((....(((((((((((.((((((..(((..........))).))))))..)))))).......)))))....)))))))).))))))))))).))))).)))))))).)))))))).)))))
-	sbi-novel-miR61	sbi-novel-MIR61-1	-	21	Chr02	-	59076995..59077015	GCGGAGCAUGGAAGCUAACCU	GUUAGCUUCCAUGUUCUGCUC	Intergenic	((((((((((((((((((((((((((((((.((((((((.(((.((((((((((((((((((((.(((((((....((((....)))).))))))).)))))))))))))))))))).))).)))))))).))))))))))))))))))))))))))))))).	Group I	39.7728	0	17.4528	0	0
-		sbi-novel-MIR61-2	-		Chr03	-	77145970..77145990	GCGGAGCAUGGAAGCUAACCU	GUUAGCUUCCAUGUUCCGCCC	Intergenic	(((((((((((((((((((.((((((((((.((((((((((.((((.(((((((((((((((((.(((((((....((((....)))).))))))).))))))))))))))))).)))).)))))))))).)))))))))).)))))))))))))))))))).
-		sbi-novel-MIR61-3	-		Chr03	+	11973203..11973223	GCGGAGCAUGGAAGCUAACCU	GUUAGCUUCCAUGUUCCGCCC	Intergenic	(((((((((((((((((((.((((((((((.((((((((((..(((.(((((((((((((((((.(((((((....((((....)))).))))))).))))))))))))))))).)))..)))))))))).)))))))))).)))))))))))))))))).))
-		sbi-novel-MIR61-4	-		Chr05	-	10241729..10241749	GCGGAGCAUGGAAGCUAACCU	GUUAGCUUCCAUGUUCUGCUC	Intergenic	(((((((((((((((((((((((((((.((.((((((((((((.((((((((((((((((((((.(((((((....((((....)))).))))))).)))))))))))))))))))).)))))))))))).)).)))))))))))))))))))))))))))).
-		sbi-novel-MIR61-5	-		Chr07	+	5865399..5865419	GCGGAGCAUGGAAGCUAACCU	GUUAGCUUCCAUGUUAUGCCC	Intergenic	(((((((((((((((.(((.((((((((((.((((((((((.((((.((((((.((((((((((.(((((((....((((....)))).))))))).)))))))))).)))))).)))).)))))))))).)))))))))).))).)))))))))))))))).
-		sbi-novel-MIR61-6	-		Chr08	+	63503441..63503461	GCGGAGCAUGGAAGCUAACCU	GUUAGCUUCCAUGUUCUGCUC	Intergenic	((((((((((((((((((((((((((((((.(.((((((((((.((((((((((((((((((((.(((((((....((((....)))).))))))).)))))))))))))))))))).)))))))))).).))))))))))))))))))))))))))))))).
-		sbi-novel-MIR61-7	-		Chr01	-	24177775..24177795	GCGGAGCAUGGAAGCUAACCU	GUUAGCUUCCAUGUUUCGCCC	Intergenic	(((((((((((((((((((.((((((((((.(((((((((((((((.(((((((((((((((((.(((((((....((((....)))).))))))).))))))))))))))))).))))))))))))))).)))))))))).)))))))))))))))))))).
-	sbi-novel-miR62	sbi-novel-MIR62	-	20	Chr07	+	65158246..65158265	GCUAUGAGAUCCGAGGGACU	UCCCAUUGAAGAUUAUAAUAU	Intronic	..(((((..(.((((((((....((((.........))))((((((((((...((((((((..((......)).))))))))))).............))))))).))))).))).)..))))).)))	Group I	65.7106	0	0	65.4899	0
-	sbi-novel-miR63	sbi-novel-MIR63	-	21	Chr03	-	68189784..68189804	GCUGCACGCGUCACCGUCGAG	CGCCGGCGCGCGCGCGCAGCCG	Intergenic	((.(((.(.(((((.(((((....))))).)))))).))).))))	Group IV	0	0	8.48452	80.958	0
-	sbi-novel-miR64	sbi-novel-MIR64	-	22	Chr03	-	68189783..68189804	GCUGCACGCGUCACCGUCGAGU	UCGCCGGCGCGCGCGCGCAGCCG	Intergenic	(((.(((.(.(((((.(((((....))))).)))))).))).)))).	Group IV	0	0	71.1658	35.3038	0
-	sbi-novel-miR65	sbi-novel-MIR65-1	-	21	Chr01	-	1042607..1042627	GGGCAAAUCAUCUGGGCUAGC	UAGCCAAGGAUGAUUUGCCUGU	3' UTR	(((((..((((((((((((((.((..((((.((.(((.((((((((((((((((...))))))).))))))))).))).)).)))).)).)))))))))))))).)))))))	Group III	0	25.2269	4.24226	0	0
-		sbi-novel-MIR65-2	-		Chr01	-	1042266..1042286	GGGCAAAUCAUCUGGGCUAGC	UAGCCAAGGAUGAUUUGCCUGU	Intronic	(((((..((((((((((((((.((((.((.((..(((((((((((((....)))).)))))))))..)).)).))))....)))))))))))))).)))))..
-	sbi-novel-miR66	sbi-novel-MIR66-1	-	21	Chr09	+	357031..357051	GGUGUAGAAUAGCGUUGUCGU	UACAAGUGCUAUUCUACACCCU	Intergenic	((((((((((((((((((.......)))).))))))))))))))))	Group IV	0	0	8.14464	28.122	0
-		sbi-novel-MIR66-2	-		Chr02	+	6790687..6790707	GGUGUAGAAUAGCGUUGUCGU	GCGCGCUAUUCUACGCUCU	Intergenic	(((((((((((((((((.(((((((((((((.((((........(((((((((((((.....))))(((((.((((((((((.((((((.((((......)))).)))))).))))))))))))))))))))))))................(((((......)))))...)))).)))))........)))))))).)))))))))))))).)).)))
-	sbi-novel-miR67	sbi-novel-MIR67-1	-	22	Chr01	+	15029374..15029395	GUAUGUGAUAGUGAGUUGGCCU	GCCAGCUCACUUCACAUACUU	Intergenic	((((((((.((((((((((((.((((((((..(((...)))..))))))))))))))))))))))))))))))	Group IV	0	0	486.235	426.435	0
-		sbi-novel-MIR67-2	-		Chr02	+	17701153..17701174	GUAUGUGAUAGUGAGUUGGCCU	GCCAGCUCACUUCACAUACUU	Intergenic	((((((((.(((((((((((((((((((((((......))))))).)))).))))))))))))))))))))))
-		sbi-novel-MIR67-3	-		Chr03	+	57818351..57818372	GUAUGUGAUAGUGAGUUGGCCU	GCCAGCUCACUACACAUUCUU	Intergenic	(.(((((.(((((((((((((.((((((((.(((...)))..)))))))))))))))))))))))))).)))
-		sbi-novel-MIR67-4	-		Chr04	+	3283042..3283063	GUAUGUGAUAGUGAGUUGGCCU	GCCAGCUCACUACACAUUCUU	Intergenic	(.(((((.((((((((((((((((((((((((......))))))).)))).)))))))))))))))))).)))
-		sbi-novel-MIR67-5	-		Chr01	-	8517990..8518011	GUAUGUGAUAGUGAGUUGGCCU	GCCAGCUCACUACACAUACUU	Intergenic	(((((((.((((((((((((((((((((((((......))))))).)))).))))))))))))))))))))))
-	sbi-novel-miR68	sbi-novel-MIR68	-	22	Chr02	+	68104992..68105013	GUGGAGUGGUAGAGGAGGGUAU	AUCUUUUUUUUCUAUUUUUAAA	Intergenic	..(((((((.((((((((((((.(....).)).)))))))))).)))))))....	Group III	0	0	151.315	0	12.3372
-	sbi-novel-miR69	sbi-novel-MIR69	-	21	Chr03	-	56685574..56685594	UAAAAAGACUGUUGUUUUAGC	UAGAACAGCGGUCUUUUUGGG	Intronic	((((((((((((((((((((((((((((((.(((((....))))).))))))))))))))))))))))))))))))))	Group III	85.8642	0	114.391	0	59.9735
-	sbi-novel-miR70	sbi-novel-MIR70	-	22	Chr07	-	15138071..15138092	UAAAUGUGUCGUAGCCAUGAUA	UCAUAUAGCAUAUACAUUACAU	Intergenic	((((...(((((((((((........(((..............)))........))))))).)).)).))))).	Group V	0	0	0	0	40.3115
-	sbi-novel-miR71	sbi-novel-MIR71	-	21	Chr09	+	53096814..53096834	UAACAAAGUUGUAGUUUCAUG	UGAAACUACAACUUUGUAACU	Intronic	(((((((((((((((((...((((((.((.(((...((((..(((..(((.((((((((((....((.(((.(((...(((......)))..))).))).)).....)))))))))).)))...)))..).)))))).)).))))))...)))))))))))))))))))	Group V	0	0	0	49.1174	93.7851
-	sbi-novel-miR72	sbi-novel-MIR72-1	-	21	Chr01	+	30996107..30996127	UAAGCACCGGGACUAAAGGUC	CCUUUAGUCCCAGUGCUUAGC	Intergenic	(((((((((((.((((((((((.(((((((((....))))))))).)))))))))).)))))))))))))	Group III	0	0	57.7438	27.3088	10.1872
-		sbi-novel-MIR72-2	-		Chr04	-	45193274..45193294	UAAGCACCGGGACUAAAGGUC	CCUUUAGUCCUGGUGCUCAGC	Intergenic	(((((((((((((((((.((((((((((((((((((((...)))))))))))))))))))).)))))))))))))))))))
-		sbi-novel-MIR72-3	-		Chr06	-	46130156..46130176	UAAGCACCGGGACUAAAGGUC	CCUUUAGUCCCAGUGCGUAUC	Intergenic	(((((((((((.((((.((((((.((((((((((...)))))))))).)))))).)))).)))))))))))))
-		sbi-novel-MIR72-4	-		Chr10	-	49511758..49511778	UAAGCACCGGGACUAAAGGUC	CCUUUAGUCCCGGUGCGUAGC	Intergenic	((((((((((((((((.((((((((((((((((((((.....)))))))))))))))))))).))))))))))))))))))
-		sbi-novel-MIR72-5	-		Chr10	-	42971527..42971547	UAAGCACCGGGACUAAAGGUC	CCUUUAGUCCCGGUGCGUAUC	Intergenic	((((((((((((((((.(((((((((((((((((....))))).......)))))))))))).))))))))))))))))))
-		sbi-novel-MIR72-6	-		Chr06	+	36220215..36220235	UAAGCACCGGGACUAAAGGUC	CCUUUAGUCCCGGUGCUUAGC	Intergenic	(((((((((((((((((((((((.(((.(((((((((.....))))))))).))).)))))))))))))))))))))))))
-		sbi-novel-MIR72-7	-		Chr06	+	7478467..7478487	UAAGCACCGGGACUAAAGGUC	CCUUUAGUCCCGGUGCUUAGC	Intergenic	(((((((((((((((((((((((((((((((((((((.....)))))))))))))))))))))))))))))))))))))))
-		sbi-novel-MIR72-8	-		Chr06	-	7478402..7478422	UAAGCACCGGGACUAAAGGUC	CCUUUAGUCCCGGUGCUUAGC	Intergenic	(((((((((((((((((((((((((((((((((((((.....)))))))))))))))))))))))))))))))))))))))
-	sbi-novel-miR73	sbi-novel-MIR73-1	-	21	Chr04	+	58723966..58723986	UAAGUCGAGUGGUCAAACUUG	AGUUUGAUCACUCGUCUUAUU	Intergenic	((((((((((((((.(((((((((((.(((((.((((((((((..((((.........((((...(((......)))...)))).........))))..))).))).)))).)))))..))))))))))).))))))))))))))))	Group V	165.575	164.609	454.484	495.975	1148.35
-		sbi-novel-MIR73-2	-		Chr06	-	54550513..54550533	UAAGUCGAGUGGUCAAACUUG	AGUUUGACCACUCGUCUUAUU	Intergenic	((((((((((((((.(((((((((((.(((((.((((((((((...(((..(((((...((((...(((......)))...))))..)))))..)))..))).))).)))).)))))..))))))))))).))))))))))))))))
-		sbi-novel-MIR73-3	-		Chr10	-	57860128..57860148	UAAGUCGAGUGGUCAAACUUG	AGUUUGACCACUCGUCUUAUU	Intronic	((((((((((((((.((((((((((...((((((((((....(((...((((((.....))))))..((((((.........................)))))))))..))))))))))..)))))))))).))))))))))))))))
-	sbi-novel-miR74	sbi-novel-MIR74-1	-	22	Chr04	+	71041968..71041989	UAAUUAUAGAUUAACUAGACUU	GCCUAGUUAGUCCAUGAUUGGA	Intergenic	(.((((((((((.(((((((((....(((((((((((((((((((((((((.((((.((.((((((.((((((((((.......(((((......))))))))))))))).)))))).)).)))).)).)))))))))))))))))))))))...))))))))).)))))))))).)))	Group V	0	0	0	8.40566	34.6366
-		sbi-novel-MIR74-2	-		Chr03	+	68635347..68635368	UAAUUAUAGAUUAACUAGACUU	GUCUAUGUUGGUUCAGUUAAA	Intergenic	(((((.(((((((.(((((((.(((...(.((((.((..(((((.(.....).)))))..)).)))).)((((((.((((((((..(.((((((((...))))))))))))).)))).))))))...............))))))))))...))))))))))))).
-	sbi-novel-miR75	sbi-novel-MIR75-1	-	21	Chr03	+	15675462..15675482	UACACUAGAGAAGAACUGCGG	GUGGUUCUUUCUAGUGUAAU	Intergenic	((((((((((((((((((((..(((.((((((((.((.((..(........)..)).)))))))))).))).)))))))))))).))))))))))	Group III	0	0	12.7987	0	10.5747
-		sbi-novel-MIR75-2	-		Chr04	+	16677849..16677869	UACACUAGAGAAGAACUGCGG	AUGGUUUUUCUCUAGUGUAAU	Intergenic	.(((((((((((((((((((...(((((((((((((((...................)))))))))))))))...))))))))))))))))))).))
-	sbi-novel-miR76	sbi-novel-MIR76	-	21	Chr04	-	8613370..8613390	UAGAGAAGUUUGACUUAGGCC	CCUAUGUCAAACUUCUCUAAC	Intronic	((((.((((((((((((((((..(((((((((((((.(((.((((....((((((((.(((((...(((((((((.((((((...((((........)))).)))))).))))..........)))))...))))).))))))))..)))).))).)))))))))))))..)))))))))))))))).)))).)	Group V	35.0936	0	50.1587	101.945	111.135
-	sbi-novel-miR77	sbi-novel-MIR77	-	20	Chr04	-	44899984..44900003	UAGCCUGUGAUGUUUGAAGU	UUUAAAGGAACAUUAAGUUGAU	Intergenic	(((....((((((((.((((......))))...)))))))))))).	Group I	142.309	0	0	0	0
-	sbi-novel-miR78	sbi-novel-MIR78-1	-	21	Chr06	-	43898604..43898624	UAGCUAAAUUUUAGCAAGGGG	CUGCUAAUUUUUAGCUAGC	Intergenic	(((((((..((((((((((((((.((((((.(((((.((.(((.........)))))..(((((((..(((((((((....))))))))).)))))))....))))).)))))).....))))))))))))))..)))))..))))	Group I	68.8792	0	0	0	0
-		sbi-novel-MIR78-2	-		Chr08	-	11763962..11763982	UAGCUAAAUUUUAGCAAGGGG	CUUUGCUAAAGUUUAGCCAAC	Intergenic	(((((((((((((((((.(((((...((((.((((.((((....)))).)))).))))((((((...((((.(........).))))...))))))(((((((((.........).))))))))))))).)))))))))))))))))))
-		sbi-novel-MIR78-3	-		Chr01	-	9747140..9747160	UAGCUAAAUUUUAGCAAGGGG	CCUUGCUAAAUUUUAGCUAGC	Intronic	((((((((((.(((((((((((((((((((((.(((((((...)))))))...........(((((((..(((((((((....))))))))).)))))))..........))))))))....))))))))))))).))))))))))))
-	sbi-novel-miR79	sbi-novel-MIR79	-	21	Chr09	+	62518771..62518791	UAGGAGGCCAAACAAUGCGCU	CGUAUUGUUUGGGCUCCUAAA	Intergenic	((((((.(((((((((((((((((((((((((.((....(((((((((((((...(((((((....................................................))))))).(((((((.........)))))))..)))))))))))))...)).))))))))))))))))))))))))).))))))))	Group IV	0	0	171.811	795.083	0
-	sbi-novel-miR80	sbi-novel-MIR80	-	22	Chr01	+	75103605..75103626	UAGUAGUUUCGUUUUUAUUUGA	ACAUACAAAUGAAAGUACUAGC	Intergenic	(.(((.((((((((.(((((.(..((((.((.((((((....)))))).))((((((((..(((..(((((...)))..))..)))......))))))))(((((((.....((..((((.((...(.(((......))))..)).))))..))...))))))).......))))..)))))).)))))))).))).)))	Group V	0	0	0	0	28.3618
-	sbi-novel-miR81	sbi-novel-MIR81-1	-	21	Chr02	+	62717805..62717825	UAUAUGUGUUGGAGUGGAUUG	AUCCACCCCAACACAUAUGGA	Intergenic	((((((((((((.((((((((((((..((((((...))))))..)))))))))))).))))))))))))))	Group IV	0	0	9.30816	16.3725	0
-		sbi-novel-MIR81-2	-		Chr07	+	2484636..2484656	UAUAUGUGUUGGAGUGGAUUG	AUCCACUCCAACGGCAUAGGAU	Intergenic	..((((((((((((((((((((.((((((((((...)))))))))).))))))))))))))).))))).)))
-	sbi-novel-miR82	sbi-novel-MIR82	-	21	Chr02	+	1628519..1628539	UAUCAGAUGGAAUUUAUCGUG	UGGUAAAAAGACAUUUUAGU	Intergenic	((..(((((...((((((((.(((....................((((..((((.....))))...))))((((((.(((.....((......))...)))..)))))).(((..(((((........))))).)))........((((.....)))).))).))))))))....)))))))))	Group III	0	0	579.22	417.793	24.4494
-	sbi-novel-miR83	sbi-novel-MIR83	-	21	Chr03	-	62385788..62385808	UAUGAUUUGAAAUGGAGGGAG	CCCUCUAUCCCAAAUUAUAGG	Intronic	((((((((..((((((((((((((((((((((((......(((((((.((((((....)))))).))))))).....(((((((......)))))))))))))))))))))))))))))))..))))))))))	Group II	0	87.0039	40.7852	17.1857	0
-	sbi-novel-miR84	sbi-novel-MIR84-1	-	21	Chr03	-	58091037..58091057	UAUGUAUCUAGAAAAGCCAAG	CUGCUUUUCUAGAUCCAUAGC	Intronic	..((((((((((((.((((((.(((.((((...(((((((.......)))))))...)))).)))..)))))).))))))))))))...)	Group III	52.1154	0	122.779	92.4429	62.2859
-		sbi-novel-MIR84-2	-		Chr07	-	54006721..54006741	UAUGUAUCUAGAAAAGCCAAG	UGGCUUUUCUAGAUAAAUAAA	Intergenic	(((((((((((((((.(((..((((((((((...(((((.(((...))).)))))...))))))))))..))).)))))))))))))))))
-		sbi-novel-MIR84-3	-		Chr09	-	8659581..8659601	UAUGUAUCUAGAAAAGCCAAG	UGGAUUCUCUAGAUACAUGAC	Intronic	(((.((.((((((((((((.(....((.(((.(((((((((((...))))))))))).))).)).......).)))))))))))).)).)))))
-		sbi-novel-MIR84-4	-		Chr01	+	40039864..40039884	UAUGUAUCUAGAAAAGCCAAG	UGGCUUUUUUAGAUACAUUGU	Intronic	((((((((((((((((((.((.(((((.((((((.((....)).)))))).))))).)).))))))))))))))))))))
-		sbi-novel-MIR84-5	-		Chr06	-	61639673..61639693	UAUGUAUCUAGAAAAGCCAAG	UGGAAUUGCUCUAAGUGCAUAGC	Intronic	(((..((..((((.((((((((......)))))))).)))).)).)))))
-	sbi-novel-miR85	sbi-novel-MIR85	-	21	Chr03	-	57722249..57722269	UAUUUGAACUAAAGAGGUUUU	AACCUCUUUAGUUCAAAUAUU	Intronic	((((((((((((((((((((((.((((((((((............)))))))))).))))))))))))))))))))))).	Group V	0	0	0	13.4491	15.8621
-	sbi-novel-miR86	sbi-novel-MIR86-1	-	21	Chr01	-	76728226..76728246	UCAAGAAUACAAUAAUGAGCC	CUCAUUAUUGUAUGCUUGAAC	Intergenic	(((((((((((((.((((((((((((((((((((((((((.(.((((((((.(((.((((((.((((((((.....(((.((((.......)))).)))......)))))))).)))))).))).)))))))).).)))))))))))))))))))))))))).))))))))))))).)	Group V	0	0	91.5815	89.9396	115.872
-		sbi-novel-MIR86-2	-		Chr07	-	61058705..61058725	UCAAGAAUACAAUAAUGAGCC	CUUAUUAUUGUAUGAUUGCAC	Intergenic	(((((((((((((..(((.((((((((((((.((((.((((.((((.((((((((((((((((((((((((......(((.((((.......)))).))).....)))))))))))))))))))))))).)))).)))).)))).)))))))))))).)))..)))))))))))))))
-		sbi-novel-MIR86-3	-		Chr09	+	10111195..10111215	UCAAGAAUACAAUAAUGAGCC	CUCAUUAUUGUAUGCUUGAAC	Intergenic	(((((((((((((.(((((.(((((((.(((.(((..((((((((((((((((.((.((((((((((((((.....((((.((((.......)))).))))..)))))))))))))).)).))))))))))))))))..))).))).))))))).))))).))))))))))))).)
-	sbi-novel-miR87	sbi-novel-MIR87	-	21	Chr01	+	71984189..71984209	UCAAUCCAUGUAGGUUGGAGU	UCCUACACACGUGGAUUGAGU	Intronic	(((((((((((..((.((((((((...((((.(((.(((...))).))).))))...)))))))).))..)))))))))))).	Group III	0	0	40.2768	0	0
-	sbi-novel-miR88	sbi-novel-MIR88	-	21	Chr01	-	11855439..11855459	UCACUUUUGUUUGUUUGUAGC	CACAAACAAACGAAAGUGCUA	Intergenic	.(((((((((((((((((.(((((((..((((((((((((..(((.....(((((((((((.(((((.(....)))))).))))))))))).....)))..))))))).))))).))))))).))))))))))))))))).))	Group V	53.8102	0	0	0	532.987
-	sbi-novel-miR89	sbi-novel-MIR89	-	21	Chr09	+	2696153..2696173	UCAGGGUGCUACUAUCGUCUG	GACGGUAGCAACACCUUGACC	Intergenic	((((((((...((((((((((((((.......)))...(((((.....)))))...)))))))))))...))))))))))	Group II	0	154.023	0	0	0
-	sbi-novel-miR90	sbi-novel-MIR90	-	21	Chr04	+	9504254..9504274	UCAUAUUAGUUGUCACUCUUG	AAAUGGCAACUAAUUUGAAA	Intronic	(((.(((((((((((...(((..((((((.((.((.(((.(((.((((((((.(((((((.(((((((((((((((..(((((.((((((......))))))...)))))................(((....))))))).))))))))).....))...))))))).)))))))).))).))).)).)).))))))..)))..))))))))))).)))))	Group IV	0	0	59.5147	79.4055	0
-	sbi-novel-miR91	sbi-novel-MIR91	-	21	Chr09	-	5390730..5390750	UCAUCGUAUGUAGAGGCUAUG	UAGCCUCUACAUGCGAUAAAA	Intergenic	..((((((((((((((((((((((((((.((((((((..((.((((((((((((((((...((((((((((((...(.(((((........((((....))))......))))).))).)))).))))))...)))))))))))))))).))..)))))))).))))))))))))))))))))))))))...)	Group V	0	0	0	0	114.66
-	sbi-novel-miR92	sbi-novel-MIR92-1	-	21	Chr02	+	13310478..13310498	UCAUUAAGUUAGACUAGAGAA	CUCUAGUCUAAUUUAAUGAAC	Intergenic	(((((((((((((((((((((((((((((((((.........)))))))))))))))))))))))))))))))))))	Group IV	0	0	10.4717	7.81167	0
-		sbi-novel-MIR92-2	-		Chr06	+	39262801..39262821	UCAUUAAGUUAGACUAGAGAA	CUCUAGUCCAACUUAAUGAAC	Intronic	((((((((.(((((((((((((((.((.....)).))))))))))))))).))))))))))
-		sbi-novel-MIR92-3	-		Chr10	+	54494025..54494045	UCAUUAAGUUAGACUAGAGAA	CUCUAGUCUAAUUUAAUGAAC	Intronic	((((((((((((((((((((((((((.....))))))))))))))))))))))))))))
-	sbi-novel-miR93	sbi-novel-MIR93-1	-	21	Chr01	+	17475059..17475079	UCAUUGAUUUAUUGUGAGAGA	UAUUACGGUAGAUUGGAU	Intergenic	(((...(((((((((((.........(((((((...(((((.....((((..(((.....)))..)))).....)))))...)))))))((((..(...((.....))..)..))))..........))))))))))))))))	Group IV	0	0	25.4536	38.7294	0
-		sbi-novel-MIR93-2	-		Chr01	+	77576138..77576158	UCAUUGAUUUAUUGUGAGAGA	UCUCAUAAUAAAUCAGCGAAC	3' UTR;Intergenic	((((((((((((((((.(((((.(((((((((.(.((..(((((..(((.(((((((........))))...((((((((((((....((........))...)))))))))))).......)))))).))))).)))))))))))).))))).))))))))))))))))))
-	sbi-novel-miR94	sbi-novel-MIR94	-	21	Chr03	-	845031..845051	UCCGUACAAGAGGUGGUCGUU	CGGCCACCUCUUGUACGGAGG	Intergenic	(((((((((((((((((((((((((((((((.(((.((.(((.(((....))).))).)).))).)))))))))))))))))))))))))))))))))	Group I	7040.6	2296.21	1582.33	2491.73	2017.6
-	sbi-novel-miR95	sbi-novel-MIR95	-	21	Chr04	+	6237525..6237545	UCGAGAAGGAGUGAAAUUGUU	CAAUUUUUCCUGUCUCCGUCU	CDS; Intronic	.(((((((((..(((((((..(((.((((.((((......(((((.((((.....))).).))))).....)))).)))))))(((((..((((..(((((((.....((.....))...))))))))))))))))(((((((........)))))))...))))))))))).))).)).))	Group V	0	0	0	0	127.709
-	sbi-novel-miR96	sbi-novel-MIR96	-	21	Chr05	+	48721129..48721149	UCGGAGGGUGAAGUAGUCCAC	AGUUAUUUGACCAGUUUUGAAU	Intergenic	.(((((((.(((..((((((((.......(((((...))))).........))))))))))).)))))).)..)	Group V	0	0	0	0	366.391
-	sbi-novel-miR97	sbi-novel-MIR97	-	20	Chr06	+	56473545..56473564	UCGUAUCGUAUCGUACCGUA	CGUAUAGUACCAGAUACCAAC	Intergenic	..(((((((((.((((.((...(((..((((((...(((.(.(((((.......))))).).))).)))))).)))..)))))).))))..)))))....	Group IV	0	0	20.9434	71.4199	30.5617
-	sbi-novel-miR98	sbi-novel-MIR98	-	21	Chr10	+	1717746..1717766	UCGUGUUGAAGCUCUACAGCC	UCGUGUUGAAGCUCUACAGCC	Intergenic	((.(((((.((((((((((((((.(((((.......)))))........)))))))))))))).))))).))))	Group III	0	0	164473	86228.9	8770.13
-	sbi-novel-miR99	sbi-novel-MIR99-1	-	21	Chr04	+	61151061..61151081	UCUAAAGUUUAGGGGAGAGGA	CCUCCUCUAAAUUUUAGAGC	Intronic	((((((((((((((((((((((((((.....((((....)))).....((((((.(.((((((.......)))))).).))))))......(((((.(((((.(........).))))).)))))........))))))))))))))))))))))))).)))	Group IV	0	0	36.1647	17.1857	0
-		sbi-novel-MIR99-2	-		Chr07	-	58894035..58894055	UCUAAAGUUUAGGGGAGAGGA	UUCUUCUCUAAACUUUAGAGU	Intergenic	((((((((((((((((((((((..............(((..(((((.............)))))..)))........((((((((((((..(...((....))...)..))))))))))))...))))))))))))))))))))))))
-	sbi-novel-miR100	sbi-novel-MIR100	-	21	Chr02	-	580548..580568	UCUAGAAAAUCCAAAACGUCU	AUGCUUUGGCUUUUCUAGAUA	Intergenic;3' UTR	(((.(((((.((((((((((((((.(.((((((((((.((((.((((((...((((((.((((.((......)).))))))))))...)))))).)))).)))))))))).).)))))))))))))).))))).)))))	Group IV	0	0	26.2986	24.9973	0
-	sbi-novel-miR101	sbi-novel-MIR101	-	20	Chr06	-	90100..90119	UCUAUGUAUCUAGAAAAGUC	UCUCAAGAUACAUAGUAA	Intergenic	(.((.((((((((((.......(((((((.((....)).)))))))................)))))))))).))...)))	Group IV	0	0	21.0389	15.1302	0
-	sbi-novel-miR102	sbi-novel-MIR102	-	21	Chr01	+	71955864..71955884	UCUAUUCACAGCCUCUCUUCC	UCUAUUCACAGCCUCUCUUCC	Intronic	((((((((((..(((((((((((((((((((((((.................)))....(((.........))).....(((......))).......(((((((((....(((....(((.(......).)))....)))..)))))))))(((.......)))))))))))))))))))))))..))))))))))))	Group V	0	0	0	18.419	5.28737
-	sbi-novel-miR103	sbi-novel-MIR103-1	-	21	Chr02	+	7248297..7248317	UCUCUAGAUUCAUAGCUUUUG	AAAGCAAUGUAUCUAGAAAAA	Intronic	..(((((((.(((.((((((((((((...(((((........)))))...)))))))))))).))).)))))))....	Group II	161.799	197.433	161.398	193.74	86.5728
-		sbi-novel-MIR103-2	-		Chr02	+	67361757..67361777	UCUCUAGAUUCAUAGCUUUUG	AAAGCUAUGAAUCUAGAAAUG	Intronic	..((((((((((((((((((((((((...(((((((((...)))))))))...))))))))))))))))))))))))...)
-	sbi-novel-miR104	sbi-novel-MIR104-1	-	21	Chr06	-	55580260..55580280	UCUUACAAUUUGGAAUGGAGA	UCUGGUUCUGAAUGCCAGAAC	3' UTR	((..(((((((((...(((...)))....))))))))).))))	Group III	104.231	46.8499	163.976	94.0055	94.5601
-		sbi-novel-MIR104-2	-		Chr04	-	1119665..1119685	UCUUACAAUUUGGAAUGGAGA	UCCAUUCCAAAUUAUAAGAUG	Intronic	(((((((((((((.((((((((((((((((((............(((((.((((((((.((((....)))).)))))))).)))))............)))))))))))))))))).)))))))))))))).
-	sbi-novel-miR105	sbi-novel-MIR105-1	-	21	Chr01	+	27345003..27345023	UCUUAUAUUUUGGAAUGGAGG	UCCAUUCCAAAUUAUAAGACA	Intronic	(((((((((((.((((((((((((((.((((((((((((....(......)....)))))))))))).)))))))))))))).)))))))))))))	Group IV	0	0	15.7792	10.9363	0
-		sbi-novel-MIR105-2	-		Chr02	+	70086395..70086415	UCUUAUAUUUUGGAAUGGAGG	UCCAUUCCAAAUUAUAAGAUG	Intronic	(((((((((((.(((((((((.(((.(((((((((((((((.(((..((((((((.....(((((((((...))))))))).....)))))))).)))))))))))))))))).))).))))))))).)))))))))))))
-		sbi-novel-MIR105-3	-		Chr03	-	69150948..69150968	UCUUAUAUUUUGGAAUGGAGG	UCUCCAAAUUAAAAGACA	3' UTR	((((((((.((.((((...(((((.....))))).....((((((.(((...((((((...((((((((((....))))))))))....))))))...))).)))))))))).)).))))))...))))
-		sbi-novel-MIR105-4	-		Chr04	-	58058842..58058862	UCUUAUAUUUUGGAAUGGAGG	UCAGUUCCAAAUUAUAAGAAG	Intronic	((.((((((((.(((((((.((((((.(((((.((.(((((((.(((((((((((((((..................))))))))))))))).))))))).))))))).)))))).))))))).)))))))).))))
-		sbi-novel-MIR105-5	-		Chr05	+	71458492..71458512	UCUUAUAUUUUGGAAUGGAGG	UCUAUUCCAAAUUAUAAGACG	Intronic	(((((((((((.(((((((.((((((.(((((.(((((((.(((((((((...)))))))))...))))..)))))))).)))))).))))))).)))))))))))))
-		sbi-novel-MIR105-6	-		Chr09	+	46709644..46709664	UCUUAUAUUUUGGAAUGGAGG	UCCAUAGCAAAUUAUAAGACA	Intronic	(((((..((((.(((((((((((((((((((((.((((.(((.((((((..((((((((((((.(((...))).))))))))))))..)))))).))).)))).))))))))))))))))))))).))))..)))))))
-	sbi-novel-miR106	sbi-novel-MIR106-1	-	21	Chr02	+	71958305..71958325	UGACCAGAUCGUAUGCCGUGG	GCAGCAUACGACCUUGUCAUG	Intergenic	((.((((((((.((.(((((((((((.(((((((((((.((((((((....(((((((((((.((((((..(((..........))).))))))..)))))).......)))))....)))))))).))))))))))).))))))))))).)).)))))))).))))	Group V	0	198.64	159.402	0	353.879
-		sbi-novel-MIR106-2	-		Chr02	-	78667220..78667240	UGACCAGAUCGUAUGCCGUGG	GCAGCAUACGACCUGGUCAUG	Intergenic	((.((((((((.((((((((((((((.((((((((((..((((((((....(((((((((((.((((((..(((..........))).))))))..)))))).......)))))....))))))))..)))))))))).)))))))))))))).)))))))).))))
-		sbi-novel-MIR106-3	-		Chr02	-	7462945..7462965	UGACCAGAUCGUAUGCCGUGG	GCAGCAUACGACCUGGUCAUA	Intergenic	((.((((((((.((((((((.(((((.(((((((.(((.((((((((....(((((((((((.((((((..(((..........))).))))))..)))))).......)))))....)))))))).))).))))))).))))).)))))))).)))))))).))))
-		sbi-novel-MIR106-4	-		Chr02	+	51358141..51358161	UGACCAGAUCGUAUGCCGUGG	GCAGCAUACGACCUGGUCAUA	Intergenic	((.((((((((.((((((((.((((..(((((((((((.((((((((....(((..((((...((.(((((.(((........((.......)).....))).))))))))))).))))))))))).)))))))))))..)))).)))))))).)))))))).))))
-		sbi-novel-MIR106-5	-		Chr03	+	53065940..53065960	UGACCAGAUCGUAUGCCGUGG	GCAGCAUACGACCUGGUCAUA	Intergenic	((.((((((((.((((((((.(((((.(((((((.(((.((((((((((((......)))).................(((((((.(((....(((....)))...))).)))).))))))))))).))).))))))).))))).)))))))).)))))))).))))
-		sbi-novel-MIR106-6	-		Chr05	-	59514065..59514085	UGACCAGAUCGUAUGCCGUGG	GUAGCAUACGACCUGGUCAUA	Intronic;CDS;Intergenic	(..((((((((.((((((((.(((((.(((((((((((.((((((((....(((((......(.(((((((.(.(((.(((...)))..))).).).)))))).)....)))))....)))))))).))))))))))).))))).)))))))).))))))))..)))
-		sbi-novel-MIR106-7	-		Chr07	-	12569261..12569281	UGACCAGAUCGUAUGCCGUGG	GCAGCAUACAACCUGGUCAUA	Intergenic	((.((((((...((((((((.(((((.(((((((.(((.((((((((....(((((((((((.((((((..(((..........))).))))))..)))))).......)))))....)))))))).))).))))))).))))).))))))))...)))))).))))
-		sbi-novel-MIR106-8	-		Chr01	-	17990707..17990727	UGACCAGAUCGUAUGCCGUGG	GCAGCAUACGACCUGGUCAUA	Intronic	((.((((((((.((((((((.(((((.(((((((((((.((((((((....(((((((((((.((((((..(((..........))).))))))..)))))).......)))))....)))))))).))))))))))).))))).)))))))).)))))))).))))
-		sbi-novel-MIR106-9	-		Chr01	+	81260076..81260096	UGACCAGAUCGUAUGCCGUGG	GCAGCAUACGACCUAGUCAUA	Intronic	((.((((((((.((.(((((.(((((.(((((((((((.((((((((....(((((((((((.((((((..(((..........))).))))))..)))))).......)))))....)))))))).))))))))))).))))).))))).)).)))))))).))))
-	sbi-novel-miR107	sbi-novel-MIR107-1	-	21	Chr05	+	69140008..69140028	UGAGUGGUCAAACUUGGGGUA	UAUCAAGUUUGACCACUGGUC	Intergenic	..(((((((((((((((.(((((((((((((.(((((((((((((...........))))))))..(((((...........(((((...)))))...........))))).......)))))..))))))))))))).)))))))))))))))..))	Group IV	0	0	189.49	250.175	0
-		sbi-novel-MIR107-2	-		Chr10	-	9425303..9425323	UGAGUGGUCAAACUUGGGGUA	UAUCAAGUUUGACCACUCGUC	Intergenic	(.(((((((((((((((((((((((((((....((((.((((((((((..(((....(((((...((((...(((......)))...))))..)))))...)))..))).))).)))).)))).....))))))))))))))))))))))))))).)).
-		sbi-novel-MIR107-3	-		Chr02	-	71036601..71036621	UGAGUGGUCAAACUUGGGGUA	UGAGUGGUCAAACUUGGGGUA	Intergenic	(.((((((((.((((((((((((((((((((.(((((.((((.(((.......(((..(((((...((((...(((......)))...))))..)))))..))).......))))))).)))))..)))))))))))))))))))).)))))))).)).
-		sbi-novel-MIR107-4	-		Chr04	-	53762323..53762343	UGAGUGGUCAAACUUGGGGUA	UGAGUGGUCAAACUUGGGGUA	Intronic	(.((((((((((((((((((((((((((((((((((((((((((((((..(.((..((....((((((...(((......)))...))))))...))..)))..))).))).))))))))))).))))))))))))))))))))))))))))).)).
-		sbi-novel-MIR107-5	-		Chr04	-	51895361..51895381	UGAGUGGUCAAACUUGGGGUA	UGAGUGGUCAAACUUGGGGUA	Intronic	(.(((((((((((((((((((((((((((((((((((((((.....(((..(....)..)))((.(((((...........(((((...)))))...........))))).))))))))))).)))))))))))))))))))))))))))))).)).
-		sbi-novel-MIR107-6	-		Chr04	-	51596763..51596783	UGAGUGGUCAAACUUGGGGUA	UGAGUGGUCAAACUUGGGGUA	Intergenic	(.((((((((((((((((((((((((.((((.(((((.((((((((((..(((....(((((...((((...(((......)))...))))..)))))..)))..))).))).)))).)))))..)))).)))))))))))))))))))))))).)).
-	sbi-novel-miR108	sbi-novel-MIR108	-	21	Chr07	-	66389400..66389420	UGCCUGUGAUGAAUCUAUGCA	CAUUCCUUAUCAUGUGGUUGU	Intergenic	.(((((((((((....((((...(((((.......))))).......(((..((((((.((((((((((...)))))))..))).)))))).))).(((((((............))))))).....((((((...((((((....))))))...............(((((.((...)))))))))))))))))...)))))))).)))...	Group I	111.728	0	0	0	0
-	sbi-novel-miR109	sbi-novel-MIR109	-	22	Chr03	+	18753671..18753692	UGGAAAAGUGUUGGUGAGUGGA	CCUUGCUUAAUUCUUACGCA	Intergenic	(((((((.(((.(((.(((....((((..((((....)))).))))....)))...))).))))))))).)))	Group V	0	0	0	14.655	100.947
-	sbi-novel-miR110	sbi-novel-MIR110	-	21	Chr10	-	44466281..44466301	UGGACAUGUGAGAGAUGGGGA	CUCAUCUCUCAUCUGUUCAUG	Intronic	((((((((((((.((((((((.(((((((.(.(((((.....((((.(..((.((.((((((..((((.((..((..((.(((...)))))..)).)).)))).)))))).)).))..).))))...((((((..........)))))).((((......)))).............))))).).))))))).)))))))).))))))))))))).	Group I	58.4894	45.5597	39.6217	7.81167	0
-	sbi-novel-miR111	sbi-novel-MIR111-1	-	21	Chr08	-	12586021..12586041	UGGCAUCCAUUCUUGGCUAAG	UUGCUCUGAGUGGGUGCUAAG	Intergenic	((((((((((((..(((...(((((.......))))).(((..((((((.((((......(((....((.(((((...((((....))))...)))))))...)))....))))...))....))))..)))......)))..))))))))))))..	Group II	43.2728	137.232	0	12.4987	0
-		sbi-novel-MIR111-2	-		Chr08	-	12586021..12586041	UGGCAUCCAUUCUUGGCUAAG	UAGCCAAGAAUGGCUUGCCUAUC	Intergenic	(((((((((((((..((((.((((((((.(((((((((((((((.(........).))))..)))))))))))))))).))))))).)))))))))))))))
-	sbi-novel-miR112	sbi-novel-MIR112	-	20	Chr01	-	75238268..75238287	UGGGCCUGUAGCUCAGAGGA	CUUUGGAGCUGCAAGUCUAUC	Intronic	(((((.(((((((.(((((((((.............(((((.(((.....))).)))))...))))))))).))))))))))))).	Group II	0	139.546	0	0	0
-	sbi-novel-miR113	sbi-novel-MIR113-1	-	21	Chr08	+	5038642..5038662	UGGUCACUAGUAAGGGCGGCU	CCGUCCUUACAGUAGACCACU	Intergenic	((((((((.((((((((((((((.....))))))))))))))))).)))))))	Group III	42.1124	0	134.953	58.7388	0
-		sbi-novel-MIR113-2	-		Chr01	+	54190507..54190527	UGGUCACUAGUAAGGGCGGCU	CCGCCCUUACUAGUGACCACU	Intergenic	((((((((((((((((((((((((((.((((((((.....)))))))).)))))))))))))))))))))))))).)
-		sbi-novel-MIR113-3	-		Chr02	+	18440528..18440548	UGGUCACUAGUAAGGGCGGCU	CCGCCCUUACGGUGGACCACU	Intergenic	((((((((.((((((((((((((.....))))))))))))))))).)))))))
-		sbi-novel-MIR113-4	-		Chr04	+	50153987..50154007	UGGUCACUAGUAAGGGCGGCU	CCGCCCUUAUAGUGGACCACU	Intergenic	(((((((((.((((((((((((((...)))))))))))))))))).)))))))
-		sbi-novel-MIR113-5	-		Chr05	+	45378291..45378311	UGGUCACUAGUAAGGGCGGCU	CCGCCCUUACAGUGAAUUCCACU	Intergenic	((((((((.((((((((((...(((...((((((((((((((((((...))))))))))))))))))...))).)))))))))))))))...)))))
-		sbi-novel-MIR113-6	-		Chr05	-	9934593..9934613	UGGUCACUAGUAAGGGCGGCU	CCGCCCUUAUAGUAGAAACCACU	Intergenic	((((..(((((((((((((((.......))))))))))))..)))..))))))
-		sbi-novel-MIR113-7	-		Chr06	-	30712618..30712638	UGGUCACUAGUAAGGGCGGCU	CCGCCCUUACAGUGGACCACU	Intergenic	((((((((.(((((((((((((((...)))))))))))))))))).)))))))
-		sbi-novel-MIR113-8	-		Chr10	+	53546534..53546554	UGGUCACUAGUAAGGGCGGCU	CCGCCCUUACUAAUGCUCACU	Intergenic	((((((((((((.((.(((((.((((((((((((.......)))))))))))).))))).)).))))))))))))))
-		sbi-novel-MIR113-9	-		Chr06	-	3520316..3520336	UGGUCACUAGUAAGGGCGGCU	CCGCCCUUACUAAUGCUCACU	Intergenic	((((((((((((.((.((((((.((((((((((((.....)))))))))))).)))))).)).))))))))))))))
-		sbi-novel-MIR113-10	-		Chr07	-	49692375..49692395	UGGUCACUAGUAAGGGCGGCU	CCGCUCUUACAGUGGACCACU	Intergenic	((((((((.((((((((((((((.....))))))))))))))))).)))))))
-	sbi-novel-miR114	sbi-novel-MIR114-1	-	21	Chr02	+	67450827..67450847	UGGUGAAAUUUUUAUGAUGGA	CGCACUAAAAACUUCACCACA	Intergenic	(((((((.((((((((.(((((....((((((((..(((.(((((..(((((((((....)))))))))))))).)))....)))).......)))).....))))))).)))))).))))))).)	Group V	0	0	0	0	90.6477
-		sbi-novel-MIR114-2	-		Chr01	-	72527381..72527401	UGGUGAAAUUUUUAUGAUGGA	CACCAUAAAAAUUUCACUAUA	Intergenic	((((((((((((((((.((((((((((((((((((((((((((((((((((((((((((((((((((((((((((((((((.((((.....((((((((((((((....))))).........)))))))))..)))).)))))))))))))))))))))))))))))))))))))))))))))))))))))))))))))))).))))))))))))))))))
-	sbi-novel-miR115	sbi-novel-MIR115	-	21	Chr02	+	13604670..13604690	UGUCAUAGAAAACAAGAAGUC	CUUCUUGUUUUCCAUGACAUU	Intronic	((((((((((((.((((((((.(((((.(((.((((.(((((.....((((((....))))))(((((...))))).......)))))...)))).))).))))).)))))))).)))))))))))).)	Group III	32.7541	30.9806	44.3252	0	0
-	sbi-novel-miR116	sbi-novel-MIR116	-	21	Chr03	+	3125444..3125464	UGUCUUAUAGUUUGGAACGGA	CAUUCUAAAUUAUAAAUCGCU	Intergenic	(.(((((((((((((..((.(((((.((((((((.((((((((((((((..((.(((.(((......))).))).))..)))))))))))))).))))))..)).))))).))..))))))))))))).)))	Group IV	0	0	0	32.4347	0
-	sbi-novel-miR117	sbi-novel-MIR117-1	-	22	Chr02	+	23537506..23537527	UUAAAGAUUCGUCUCGUGAUUU	GUGACGGGGAAUCUUGUAAAG	Intergenic	((((((((((..(((((......((((((...(((((((..((.....))..)))))))))))))((((.....))))(((((.........))))).)))))))))))).)))))	Group II	314.295	360.199	33.7421	6.24934	0
-		sbi-novel-MIR117-2	-		Chr08	-	7245792..7245813	UUAAAGAUUCGUCUCGUGAUUU	ACUGCAAGACAAAUCUAUUAAGU	Intergenic	(.(((.((((.(((((.((((((.((.(((.(((((.((((((....(((...........))).....)))))).))))).))).)).))))))))))).)))).))).)))
-	sbi-novel-miR118	sbi-novel-MIR118	-	22	Chr05	+	13213265..13213286	UUAAAUGUGCAUGUGUGGUGGA	UAUAGCUAAUGGAAUAUUUAAGU	Intergenic	(((.((..(((..(((((((((((((((((((....))))......)))).)))(((((((((((....((........))....)))...))))))))..)))))))).)))..)).)))).	Group V	0	0	0	0	28.9118
-	sbi-novel-miR119	sbi-novel-MIR119	-	21	Chr01	-	70335797..70335817	UUACAUGAGCAUGACAGUGUU	CACUGUCAUGCUCAUGUAAUG	Intronic	(((((((((((((((((((((((((((.(((((((((......((((...)))).............))))))))).)))))))))))))))))))))))))))))	Group III	0	0	217.27	216.691	210.595
-	sbi-novel-miR120	sbi-novel-MIR120	-	21	Chr09	-	52002592..52002612	UUAGAGCAUCUCCAACAGAUU	UCUGUUGAGCAUGCCUUACA	Intronic	(((((((((.((((((...............)).)))))).)))))))..	Group III	0	0	46.6682	0	0
-	sbi-novel-miR121	sbi-novel-MIR121	-	21	Chr01	+	7855181..7855201	UUAGGGACUUGGAAAUGCAUU	UGCAUUUCUAGGCCCCUAAAC	5' UTR	((((((((((((.((((((((((.((.(.(((((((((((((((.....((((((((....)))))))))))))).(((((((((............)))).)))))))))))))).).)).)))))))))).))))))))))))))	Group I	246.926	152.323	141.806	119.871	46.4238
-	sbi-novel-miR122	sbi-novel-MIR122	-	21	Chr04	+	2799840..2799860	UUAGUAGAUUCGUUUCACAAA	UGUGAGAUGAAUCUAUUAAGC	Intronic	((((((((((((((((((((((((.(((.(((((.(((.((..(((......)))))))).))))).))).)))))))))))))))))))))))).)	Group II	0	30.9806	8.48452	0	24.2869
-	sbi-novel-miR123	sbi-novel-MIR123-1	-	21	Chr10	-	62400186..62400206	UUAUAAGACGUUUUGGCAUUU	AAUCCAAAUUGUCUUAUAAUU	Intronic	((((((((((.(((((..((((((((.((((..(((((((((((...(((((((((...)))))))))...)))))))))))..)))).))))))))..))))).))))))))))))	Group IV	0	0	32.1003	32.5535	28.5243
-		sbi-novel-MIR123-2	-		Chr01	+	64191257..64191277	UUAUAAGACGUUUUGGCAUUU	AAGCCAAAACAUCUUAUAAUU	Intronic	((((((((.((((((((...((((((.(((((.((((((((((((.(((((((((((((((((((((.......(((((..(((.....((....(((((........)).)))...))....)))))))).))))))))))))))))))))).)))))))))))).))))).))))))...)))))))).))))))))))
-		sbi-novel-MIR123-3	-		Chr10	+	8944817..8944837	UUAUAAGACGUUUUGGCAUUU	AAGCCAAAACAUCUUAUAAUU	Intronic	((((((((.((((((((.((((((.(((((((((.(((.(((((((((((((.(((...))).))))))))))))).))).))))))))).)))))).)))))))).))))))))))
-		sbi-novel-MIR123-4	-		Chr01	-	61326722..61326742	UUAUAAGACGUUUUGGCAUUU	AAGAUAAAAUGUCUUAUAAUU	Intronic	(((((((((((((((...((((((((((..((((....))))))))))))))...)))))))))))))))))
-		sbi-novel-MIR123-5	-		Chr03	-	73200443..73200463	UUAUAAGACGUUUUGGCAUUU	AAGUCAAAACGUCUUAUAAUU	Intronic	(((((((((((((((((.(((((((((.(((((..(((.((((.((((((((.(((...))).)))))))).)))).)))..))))).))))))))).)))))))))))))))))))
-		sbi-novel-MIR123-6	-		Chr03	-	6205411..6205431	UUAUAAGACGUUUUGGCAUUU	AAGCUAAAACGGUUUGUAAUU	Intronic	((((((..(((((((((.(((.(((((((((((.((((..((((((((.((.....................)).))))))))..)))).)))))))))))...))).)))))))))..))))))))
-		sbi-novel-MIR123-7	-		Chr10	-	5589133..5589153	UUAUAAGACGUUUUGGCAUUU	AAGCCAAAACGUCUUAUAAUU	Intronic	(((((((((((((((((.((((((((((.(((((((...(((......)))...)))))))..........(((((....))))).)))))))))).)))))))))))))))))))
-	sbi-novel-miR124	sbi-novel-MIR124	-	21	Chr03	-	61998194..61998214	UUAUAGGAUGUUUUGGUAUUU	AAGCCAACACAUCUUAUAAUU	Intronic	(((((((((((.(((((.(((.((((((((((((((..(((((((...(((((((((...)))))))))...))))))))))))))))))))).))).))))).)))))))))))))	Group IV	0	0	10.5195	18.4925	0
-	sbi-novel-miR125	sbi-novel-MIR125	-	21	Chr10	-	18552144..18552164	UUAUCUCUGUUAUGUUUCUUC	AGAAACAGAACAGAGAUAAAA	5' UTR	(((((((((((.((((((((((((((.((...........(((((...((......(((((.(((((...(..((.(....)))..))))))...)))))..((((((((....))))))))..))...)))))........)).)))))))))))))).)))))))))))))	Group V	24.0405	0	0	0	24.6744
-	sbi-novel-miR126	sbi-novel-MIR126	-	21	Chr08	+	59727319..59727339	UUAUGGAAAGUGGAGCCAGCC	CUGGCUCCACUUGCCAUAACA	Intronic	((((((.(((((((((((((((((((((((((...((...))....))))))))))))))))))))))))).))))))))	Group I	159.073	130.393	43.6355	31.1099	12.2247
-	sbi-novel-miR127	sbi-novel-MIR127	-	21	Chr09	-	4107647..4107667	UUAUGGUUUGUUAGUGUAUUU	CUAGACGACACCAUAGAA	Intronic	.((.(((((((((((((.....))))))))..))).)).))..)	Group V	0	0	0	43.7274	220.669
-	sbi-novel-miR128	sbi-novel-MIR128-1	-	21	Chr09	+	54172549..54172569	UUCGUCUCGCAAAUUAGUCUC	GACUAUUUUGCGAGACGAAUC	Intronic	(((((.((((((((((((((((((((((((((((((...........(((((.......))).))........(((.......))))))))))))))))))))))))))))))))).)))))))	Group II	40.0674	37.8403	0	0	0
-		sbi-novel-MIR128-2	-		Chr09	+	3019432..3019452	UUCGUCUCGCAAAUUAGUCUC	GACUAAUUCGCAAGAUAAAUC	Intronic	((((((((.((.((((.((((((((....(((((((.....))))))).......(((.((((....)))).)))....(((.(......).)))...)))))))).)))).)).))))))))))
-	sbi-novel-miR129	sbi-novel-MIR129	-	21	Chr07	+	51692362..51692382	UUCUGGAUCCCUAAACUUGUU	CAAGUUUAGGAACCCAAAAAU	Intronic	((.(((...(((((((((((((.(((((..((((((...(((....(((.((.(((((((...(((...))))))))))...)).)))..))).))))))..))))).)))))))))))))...))).))))	Group III	0	0	30.2993	0	0
-	sbi-novel-miR130	sbi-novel-MIR130-1	-	21	Chr06	-	50809456..50809476	UUGAAGAGUCAAAGCAUUUCA	AGAUGAUUUGACUCUCCAAGA	Intergenic	(((.(((((((((.(((((.(((((((((((((..((((..((....(((.((.((((((((..((((((((((((((((((....)))))).................))))))))))))..)))))))).)).))))).))))..))))))))))))).))))).))))))))).)))))	Group IV	0	0	62.6198	12.4987	0
-		sbi-novel-MIR130-2	-		Chr06	-	59346461..59346481	UUGAAGAGUCAAAGCAUUUCA	AAAUUCUUUGACUCUUCAAAA	Intergenic	((((((((((((((.((((((((((((((((((.((((((((((....)))))..((((............))))..............(((((((.(......))))))))...................))))).)))))))))))))))))).)))))))))))))).)
-	sbi-novel-miR131	sbi-novel-MIR131	-	21	Chr05	-	1708982..1709002	UUGACUGAACAUAUUUUGCAG	GCUAAAUAAUUUCUGCAAUG	Intronic;CDS	(((.(.(((..(((((.((((((....(((((((.((((.....)))).((((....((((((.((..(((((..((((....)))).))))).))..)))))).((((....)))).)))).......((((((.(((.(((..(((...))).))).)))...)))))).)))))))))))....)).)))))..))).))))).	Group II	0	65.1557	0	0	0
-	sbi-novel-miR132	sbi-novel-MIR132	-	21	Chr04	-	4075440..4075460	UUGAGUGCAGCGUUGAUGAGC	UUGAGUGCAGCGUUGAUGAGC	3' UTR	(((((((((((((((.((((((.(.((((((((..((((.(((.....)))))))))))))))))))))).)))))))))))))))).	Group III	0	0	1278.05	1272.68	264.868
-	sbi-novel-miR133	sbi-novel-MIR133-1	-	21	Chr02	+	67686926..67686946	UUGGAUGUAGUCGUAUUCACG	UGAAUACGACAACAUCCAAAC	Intergenic	((((((((.(((((((((((.((((((((..(((((((..(((((((((.((((((.((......)))))))).)))))))))..)))))))..)))))))).))))))))))).))))))))))	Group V	0	0	0	56.8657	40.749
-		sbi-novel-MIR133-2	-		Chr06	+	58686111..58686131	UUGGAUGUAGUCGUAUUCACG	UGAAUACGACAACAUCCAAAC	Intergenic	((((((((.(((((((((((.(((((.((..(((((((..(((((((((.((((((.((......)))))))).)))))))))..)))))))..)).))))).))))))))))).))))))))))
-	sbi-novel-miR134	sbi-novel-MIR134-1	-	21	Chr02	+	46909831..46909851	UUGGCCAAAGUUAGAGAAGUU	CUUUGUUAACAUUGACCAAAU	Intronic	((((.(((((.(((.((((.(((.((((((((((....((((.......(((((...((((.(((((((((..........))).)))))).)))).....)))).).......))))....)))))))))).))).)))).))).))))).))))))	Group V	0	23.6911	94.076	87.8477	143.134
-		sbi-novel-MIR134-2	-		Chr04	+	60237156..60237176	UUGGCCAAAGUUAGAGAAGUU	CUUCUCUAAUUUUGACCAAGU	Intronic	((((((((((((((.(((((((.(((((...(((((....((((((..(((...((((((.(..................).))))))..)))((((((((.......)))))))).))))))....))))).))))).))))))).))))))))))))))))
-		sbi-novel-MIR134-3	-		Chr06	+	34412816..34412836	UUGGCCAAAGUUAGAGAAGUU	CUUCUCUUAUUUUGACCAAGU	Intronic	(((((((.((((((.((((((.((((((((.(((((((.(((((......(((((((.(((((..((((((.((........)).))))))....))))).))))))).....))))).)))))......)).)))))))).)))))).)))))).)))))))))
-	sbi-novel-miR135	sbi-novel-MIR135-1	-	21	Chr04	+	54426302..54426322	UUGUAAGUCGUUCUAGCUUUU	UUGUAAGUCGUUCUAGCUUUU	Intronic	((((((((((((...((((((.((((((((((.(((((......((((((((...........))))))))......))))).)))))))))).))))))...))))))))))))))	Group IV	0	0	0	52.5348	0
-		sbi-novel-MIR135-2	-		Chr06	+	53258729..53258749	UUGUAAGUCGUUCUAGCUUUU	UUGUAAGUCGUUCUAGCUUUU	Intronic	(((((((.((((...(((((...(((((((((.....)))))))))...(((...)))...(((((((.................))))))))))))...)))).)))))))))
-		sbi-novel-MIR135-3	-		Chr09	-	25089229..25089249	UUGUAAGUCGUUCUAGCUUUU	AAGCCUGAACGACUUACAAUU	Intronic	(((((((((((((..(((((((((((((((((.(((...))).)))))))(((((((....)))))))..))))))))))..)))))))))))))))
-		sbi-novel-MIR135-4	-		Chr04	+	70685996..70686016	UUGUAAGUCGUUCUAGCUUUU	UUGUAAGUCGUUCUAGCUUUU	Intronic	((((((((.(((((.(((((((((((((((((((((.........((((((.......))))))((((........))))...))))))))))))))))))))).))))).))))))))))
-	sbi-novel-miR136	sbi-novel-MIR136	-	21	Chr02	-	63916298..63916318	UUGUUGUACCUUUAAAUCUAU	AUGUUUGAACUAUGAUAAAA	Intergenic	((((((((..(((((((.((((..................((((.((........)).))))..((((((((.((((((........))))))))))).)))...)))).))))))).))))))))))	Group V	0	0	0	0	53.1987
-	sbi-novel-miR137	sbi-novel-MIR137	-	21	Chr06	+	47301600..47301620	UUGUUGUAGUCAUUCGCCUUG	AGGUGACCGACUACAACAAUG	Intronic	(((((((((((..(((((((.(((((.((((.((((...(((..(((((...((..((((((.(((((...............))))).))))))))....)))))..)))..(((............))).......((((..(((.((((........)))).)))...))))......)))).)))).))))).)))))))..)))))))))))))	Group IV	0	0	0	43.2522	0
-	sbi-novel-miR138	sbi-novel-MIR138-1	-	22	Chr01	+	56299240..56299261	UUUACUACAAGAGCUCCUUCUC	UCUGGAGUGCUUGUGUGGAGA	Intergenic	(((((.(((((.(((((......(((((((...((....))))))))).))))).))))))))))).	Group V	0	0	0	0	32.9867
-		sbi-novel-MIR138-2	-		Chr07	-	6757693..6757714	UUUACUACAAGAGCUCCUUCUC	UUUGGAGUGUUUGUGUGAAGA	Intergenic	(((((.(((((.(((((...((((....))))((((.....))))....))))).))))))))))))
-	sbi-novel-miR139	sbi-novel-MIR139-1	-	21	Chr02	-	75407685..75407705	UUUAGAUGCGAAAAGAUUUUU	AAAUUUUUUGGUUUUUGGGUG	Intergenic	((((((.((.(((((((((((...(((((((((...))))......(((((((...)))))))...(((((....)))))......(((((....)))))(((....)))..(((((((((((((......))))........)))))))))....((((.....))))((((((((...)))))))).....)))))...))))))))))).)).))))))))	Group V	0	0	0	0	56.7236
-		sbi-novel-MIR139-2	-		Chr03	+	9773340..9773360	UUUAGAUGCGAAAAGAUUUUU	AAAGUUUUUGGAUCUAAACA	Intergenic	(((.((((((.(((((((((((((((((((((..........))))))))......)).))))))))))).))))))..)))))
-	sbi-novel-miR140	sbi-novel-MIR140	-	21	Chr07	-	23409523..23409543	UUUAGCACCGGUUCGUGUUUU	AACACGAACCGGUGCUAAAGG	Intergenic	(((((((((((((((((((((((((.(((((.(((.((((......)).)).)))))))))))))))))))))))))))))))))))	Group V	0	0	0	0	34.4741
-	sbi-novel-miR141	sbi-novel-MIR141-1	-	21	Chr02	+	77915333..77915353	UUUAUGAGAUAUAAAAAUAAC	UAUUUUUAUAUCUCACAAACG	Intergenic	(((.((((((((((((((((((((((((...((((..............))))....)))))))))))))))))))))))).)))))	Group IV	0	0	166.271	137.487	0
-		sbi-novel-MIR141-2	-		Chr07	-	58527707..58527727	UUUAUGAGAUAUAAAAAUAAC	UAUUUUUAUAUCUCAAAUG	3' UTR	((..((((((((((((((((.(((((((.(((..(((..(((....)))..)))))).))))))).))))))))))))))))))))
-		sbi-novel-MIR141-3	-		Chr09	+	3072119..3072139	UUUAUGAGAUAUAAAAAUAAC	UAUUUUUAUAUCUCACAAAAG	Intergenic	(((.((((((((((((((((.(((((((.(((....(((((((....)))))))))).))))))).)))))))))))))))).))).)
-		sbi-novel-MIR141-4	-		Chr09	-	53359916..53359936	UUUAUGAGAUAUAAAAAUAAC	UAAUUUUAUAUCUCACAAACA	Intergenic	(((.((((((((((((.(((((((((((.(((((.......((((...))))))))).))))))))))).)))))))))))).)))..
-		sbi-novel-MIR141-5	-		Chr10	+	62046703..62046723	UUUAUGAGAUAUAAAAAUAAC	UAUUUUUAUAUCUCACAAACG	Intergenic	(((.((((((((((((((((.((((((.(((......)))(((.....)))......))))))..)))))))))))))))).)))))
-	sbi-novel-miR142	sbi-novel-MIR142	-	21	Chr06	-	14828293..14828313	UUUCAAGAUUCAUAGCAUUUG	AAAGCUAUGAAUCUAGAAAAG	Intronic	((((.(((((((((((.((((((((((.((((((((((...)))))))))).)))))))))).))))))))))).)))).)	Group IV	0	0	31.5106	41.7172	24.6744
-	sbi-novel-miR143	sbi-novel-MIR143	-	22	Chr03	+	8683902..8683923	UUUCCUAUUCCAUCCAGUUCGA	GGACUGGACGAACUGGAAACU	Intergenic	((((((((.(((..(((((.(((((.(((......))).)))).).)))))..)))..))))))))))	Group V	0	0	0	0	157.446
-	sbi-novel-miR144	sbi-novel-MIR144-1	-	22	Chr01	-	71783522..71783543	UUUCGUAAGGGGAGUCAGGUUC	ACCUGAUUCAACUUAUGAAUGG	Intergenic	(((((((((..((((((((.((((((((((((((((........((.(((.(...((.(((((((....)))))))))...(((...((((...((......))...))))...)))).))).)).)))))))))......))))))).))))))))..)))))))))))	Group IV	0	131.929	59049.3	113899	9555.72
-		sbi-novel-MIR144-2	-		Chr06	+	53015159..53015180	UUUCGUAAGGGGAGUCAGGUUC	ACCUGACUCAACUUAUGAAUGG	Intergenic	(((((((((..((((((((.((((((((((((((((((.....((((..(.(((.(.(((...(((((((.....(((.......)))...)))))))))).).))).).)))))))))))))))......))))))).))))))))..)))))))))))
-	sbi-novel-miR145	sbi-novel-MIR145-1	-	21	Chr08	-	4567931..4567951	UUUCUAGAUUCAUUACUUUUG	AAAGCAAUGUAUCUAGAAAAG	Intronic	(((((((((.((((.(((((((((((((.(((((((((...))))))))).))))))))))))).)))).)))))))))))	Group II	127.405	103.262	0	0	0
-		sbi-novel-MIR145-2	-		Chr02	+	78907271..78907291	UUUCUAGAUUCAUUACUUUUG	AAAGCAAUGUAUCUAGAAAAG	Intronic	(((((((((.((((.((((((((...(((((((((.........)))))))))...)))))))).)))).)))))))))))
-	sbi-novel-miR146	sbi-novel-MIR146	-	21	Chr08	+	4490133..4490153	UUUCUAGGUACAUUGCUUUUA	AGAGCUAUGUAUCUAGAAAAG	Intronic	(((((((((((((.((((((..(((((((.(((((((.....))))))).)))))))..)))))).)))))))))))))))	Group I	87.7248	29.1582	9.30816	0	0
-	sbi-novel-miR147	sbi-novel-MIR147	-	21	Chr03	-	74225606..74225626	UUUGAAGAGAUUUGAGUUCAA	AAACUCAAAUCUCUUCAAAUU	Intergenic	.(((((((((((((((((((((((((((((((((((((((((((........((((.((....)).))))((((((..(((((...))))).))).)))(((.((((.(((..((.((.........)).)).))))))).)))))))))))))))))))))))))))))))))))))))))))))).))	Group V	0	0	0	0	98.2475
-	sbi-novel-miR148	sbi-novel-MIR148	-	21	Chr03	-	6118008..6118028	UUUGGACGGUGGUUUUGUCUU	GUCUACAUAACCCCCCAAACU	Intergenic	(...(((.(((((((((((((((((((((.((.....((((.....)))).......(((((..........................))))).......)))))).)))))).)))))..)).)))).))))))	Group V	0	0	83.6784	112.854	287.58
-	sbi-novel-miR149	sbi-novel-MIR149	-	21	Chr02	+	52484243..52484263	UUUGGAGGGUGAUUUUGUCUU	GUCUAUUUCACCCUCCGAACU	Intergenic	(.(.(..((((((((((((((.(((.......((((.((((...................)))).))))......)))))....))))))))))))..).).)).	Group V	0	0	0	0	276.018
-	sbi-novel-miR150	sbi-novel-MIR150-1	-	22	Chr01	-	3348254..3348275	UUUGGAUGUUGUCGGAUUUACC	CGAAUCCGACUACAUCCAAACA	Intergenic	(((((((((.(((((((((.(.((((((((((((((((((.((.((((.(((((((((((.....))))))))))).)))).)).)))))))))))))))))).).))))))))).)))))))))))	Group III	0	0	10.4717	0	5.28737
-		sbi-novel-MIR150-2	-		Chr02	-	67374749..67374770	UUUGGAUGUUGUCGGAUUUACC	CGAAUCCGACUACAUCCAAACA	Intergenic	(((((((((.(((((((((...((((((((((((((((((.(((((((.(((((((((((.....))))))))))).))))))).))))))))))))))))))...))))))))).)))))))))))
-		sbi-novel-MIR150-3	-		Chr03	+	10760951..10760972	UUUGGAUGUUGUCGGAUUUACC	UGAAUCCGACUACAUCCAAACA	Intergenic	(((((((((.(((((((((((.(((((((((((((.((((((((((((((.....))))))))))))))...........))))))))))))).))))))))))).)))))))))))
-	sbi-novel-miR151	sbi-novel-MIR151	-	21	Chr03	+	5181524..5181544	UUUGGUUUAGGACAACUCUAA	AGAGUCGACUUGAGUCAAACU	3' UTR	(((((.(.(((((((((((((((((.((((((((((((.(((((((.((((((.(((((...))))).)))))).(((((.((((((......)))))).)))))...............((((.......))))...))))))).)))))))))))).))))))))))))))))).).)))))))	Group II	41.6701	188.096	0	0	0
-	sbi-novel-miR152	sbi-novel-MIR152	-	22	Chr01	-	72087597..72087618	UUUUAAUGGGCAUGGUGUCUUC	AGUGCCAGCCAAUUAACUGA	Intronic	..(((((.(((.(((((.(((...((((.........)))).))))))))))).)))))....	Group IV	0	0	434.345	437.611	133.047
-	sbi-novel-miR153	sbi-novel-MIR153-1	-	22	Chr02	+	5404940..5404961	UUUUCUAGAUACAUUGUGUUUG	AAAGCUAUGCAUCUAGAAAAGC	Intronic	((((((((((.(((.((.((((.((((((.(((.(((((...))))).))).)))))).)))).)).))).))))))))))))	Group III	0	0	26.8406	0	0
-		sbi-novel-MIR153-2	-		Chr01	-	76848824..76848845	UUUUCUAGAUACAUUGUGUUUG	AAAAGUAUGUAUCUAGAAAAGC	Intronic	((((((((((((((....((((...(((((((....))))))).))))....))))))))))))))))
-	sbi-novel-miR154	sbi-novel-MIR154-1	-	21	Chr03	+	60397258..60397278	UUUUUUGGAUGUCAUAUCGGA	CGUAAGGAUGUCGGGAGGGGG	Intergenic	((((((.((((((....(((.....)))....)))))).))))))..	Group IV	0	0	223.939	84.9696	0
-		sbi-novel-MIR154-2	-		Chr01	+	79820946..79820966	UUUUUUGGAUGUCAUAUCGGA	GGAGAGAUGUCGGAAGAGGUU	Intergenic	((((((.((((((...((.((....)).))..)))))).))))).)))
-		sbi-novel-MIR154-3	-		Chr06	-	49938440..49938460	UUUUUUGGAUGUCAUAUCGGA	CGGAAGGAUGUCGGGAGGAGUU	Intergenic	((((((.((((((...((((.....))))...))))))..))))))))
-		sbi-novel-MIR154-4	-		Chr09	-	51476584..51476604	UUUUUUGGAUGUCAUAUCGGA	CGGAAGGAUGUCGGGAGGGGUU	Intergenic	((((((.((((((...((((.....))))...))))))..))))))))
-		sbi-novel-MIR154-5	-		Chr10	+	7615131..7615151	UUUUUUGGAUGUCAUAUCGGA	CGUAAUGAUGUCGGGAAGGGUU	Intergenic	((((((.((((((((..(((.....)))..))))))))..))))))))
-		sbi-novel-MIR154-6	-		Chr01	-	78341223..78341243	UUUUUUGGAUGUCAUAUCGGA	CGGAAGAAUGUCGAGAGAGAUU	Intergenic	((((((.(((((..(.((((.....)))).)..)))))..))))))))

## Sheet: Table 3
Supplementary Table 3. Predicted putative targets of miRNAs. Target orthologs, expression values, pathways, transcription factor (TF) families, and Pearson correlation coefficient of miRNAs and corresponding targets are also shown.
miRNA ID	Target Gene	Expectation	UPE$	Target_start	Target_end	miRNA_aligned_fragment	alignment	Target_aligned_fragment	Inhibition	Target orthologs and their functions									Expression values (TPM)					Pathways	TFs	Correlation
										Rice			Arabidopsis			Maize
										Rice ID	Gene name	Function	AT ID	Gene name	Function	Maize ID	Gene name	Function	1-2 DBP	0-1 DAP	10 DAP	20 DAP	30 DAP
sbi-miR156.1	Sobic.004G058900	1.5	-1	966	986	UUGACAGAAGAGAGCGAGCAC	:::::: :::::::::::::.	GUGCUCUCUCUCUUCUGUCAG	Cleavage	LOC_Os06g45310	-	-	-	-	-	Zm00001eb233320	-	Squamosa promoter-binding-like protein 12	22.5702	17.7974	19.8398	12.0484	3.10543	RNA biosynthesis	SBP	-0.888024
sbi-miR156.1	Sobic.009G059600	3	-1	176	196	UUGACAGAAGAGAGCGAGCAC	: ::::: ::::::::::.:	CUCCUCGCCCUCUUCUGUCGA	Cleavage	LOC_Os05g07680	-	-	AT5G58320;AT2G30500	NETWORKED 4A (NET4A)#(AT5G58320);NETWORKED 4B (NET4B)#(AT2G30500)	Encodes a member of the NET superfamily of proteins that potentially couples different membranes to the actin cytoskeleton in plant cells. It colocalizes with filamentous actin and is localized to the tonoplast membrane. It is expressed in the epidermis of the root meristem and the early expansion zone.#(AT5G58320);Kinase interacting (KIP1-like) family protein.#(AT2G30500)	Zm00001eb345890	-	NAB domain-containing protein	25.7917	25.3545	32.3647	12.3977	5.11247	Cytoskeleton organisation	-	-0.786826
sbi-miR156.1	Sobic.002G257900	2	-1	1122	1142	UUGACAGAAGAGAGCGAGCAC	:::::: :::::::::::::	GUGCUCUCUCUCUUCUGUCAU	Cleavage	LOC_Os09g32944;LOC_Os09g32944;LOC_Os09g32944;LOC_Os09g32944;LOC_Os09g32944;LOC_Os09g32944;LOC_Os09g32944;LOC_Os09g32944;LOC_Os09g32944;LOC_Os09g32944;LOC_Os09g32944;LOC_Os09g32944;LOC_Os09g32944;LOC_Os09g32944;LOC_Os09g32944;LOC_Os09g32944;LOC_Os09g32944;LOC_Os09g32944;LOC_Os09g32944;LOC_Os09g32944;LOC_Os09g32944;LOC_Os09g32944;LOC_Os09g32944;LOC_Os09g32944	OsSPL18#(LOC_Os09g32944);OsSPL18#(LOC_Os09g32944);OsSPL18#(LOC_Os09g32944);OsSPL18#(LOC_Os09g32944);OsSPL18#(LOC_Os09g32944);OsSPL18#(LOC_Os09g32944);OsSPL18#(LOC_Os09g32944);OsSPL18#(LOC_Os09g32944);OsSPL18#(LOC_Os09g32944);OsSPL18#(LOC_Os09g32944);OsSPL18#(LOC_Os09g32944);OsSPL18#(LOC_Os09g32944);OsSPL18#(LOC_Os09g32944);OsSPL18#(LOC_Os09g32944);OsSPL18#(LOC_Os09g32944);OsSPL18#(LOC_Os09g32944)…	Transcriptional activation experiments indicated that OsSPL18 is a functional transcription factor with activation domains in both the N-terminus and C-terminus, and both activation domains are indispensable for its biological functions.#(transcription factor#(OsSPL18#(LOC_Os09g32944)));In this study, we studied the biological function of OsSPL18 during grain and panicle development in rice.#(pan…	AT5G50570;AT5G50670	SQUAMOSA PROMOTER-BINDING PROTEIN LIKE 13A (SPL13A)#(AT5G50570);SQUAMOSA PROMOTER-BINDING PROTEIN LIKE 13B (SPL13B)#(AT5G50670)	Together with SPL13B involved in floral transition. Expression reduced by Verticillium dahliae SRNAs which affects the plant's miR157d which targets SPL13A and B.#(AT5G50570);Together with SPL13B involved in floral transition. Expression reduced by Verticillium dahliae SRNAs which affects the plant's miR157d which targets SPL13A and B.#(AT5G50670)	Zm00001eb102440	TGA1	Teosinte glume architecture 1	2.81358	2.5418	1.25839	1.22839	0.231261	RNA biosynthesis	SBP	-0.754055
sbi-miR156.1	Sobic.004G036900	1	-1	1506	1526	UUGACAGAAGAGAGCGAGCAC	:::::: ::::::::::::::	GUGCUCUCUCUCUUCUGUCAA	Cleavage	LOC_Os02g04680;LOC_Os02g04680;LOC_Os02g04680	OsSPL3#(LOC_Os02g04680);OsSPL3#(LOC_Os02g04680);OsSPL3#(LOC_Os02g04680)	Map-based cloning revealed that lcrn1 is caused by a mutation of a putative transcription factor coding gene OsSPL3 (SQUAMOSA PROMOTER-BINDING PROTEIN-LIKE3).#(transcription factor#(OsSPL3#(LOC_Os02g04680)));Chromatin immunoprecipitation sequencing assays of OsSPL3-binding sites and RNA-sequencing of differentially expressed transcripts in lcrn1 further identified potential direct targets of OsSP…	AT1G27370;AT5G43270	SQUAMOSA PROMOTER BINDING PROTEIN-LIKE 10 (SPL10)#(AT1G27370);SQUAMOSA PROMOTER BINDING PROTEIN-LIKE 2 (SPL2)#(AT5G43270)	In conjunction with SPL11 and SPL2, SPL10 redundantly controls proper development of lateral organs in association with shoot maturation in the reproductive phase. SPL2, SPL10, and SPL11, suppress root regeneration with age by inhibiting wound-induced auxin biosynthesis. SPL10 also controls lamina shape during vegetative development.#(AT1G27370);Member of the SPL (squamosa-promoter binding protei…	Zm00001eb232050	SPL3	Squamosa promoter-binding-like protein 2	16.4841	18.6018	8.78953	3.73966	1.18234	RNA biosynthesis	SBP	-0.661209
sbi-miR156.1	Sobic.003G298900	3	-1	982	1002	UUGACAGAAGAGAGCGAGCAC	::::: .:::::::: ::::	AUGCUCAUUCUCUUCUUUCAA	Cleavage	LOC_Os01g55040	-	-	-	-	-	Zm00001eb152900	-	-	96.7887	115.764	32.3288	17.8677	4.46837	Cell wall organisation;Enzyme classification	-	-0.583716
sbi-miR156.1	Sobic.004G342300	5	-1	2006	2026	UUGACAGAAGAGAGCGAGCAC	:: ::.:::::.::.::::	GUUCUUGCUCUUUUUUGUCUU	Cleavage	LOC_Os02g56950	-	-	AT5G44010	-	fanconi anemia group F protein (FANCF).	Zm00001eb191560	-	-	14.5866	17.0429	5.94765	2.40839	1.24121	-	-	-0.580675
sbi-miR156.1	Sobic.010G032900	3	-1	2188	2208	UUGACAGAAGAGAGCGAGCAC	:::::: ::::::.:::: :	UUGCUCGAUCUCUUUUGUCUA	Cleavage	LOC_Os06g05100	-	-	AT5G11380	1-DEOXY-D-XYLULOSE 5-PHOSPHATE SYNTHASE 3 (DXPS3)	Encodes a protein postulated to have 1-deoxy-D-xylulose 5-phosphate synthase activity.	Zm00001eb377300	-	1-deoxy-D-xylulose-5-phosphate synthase	50.5344	52.0655	13.3465	9.70464	2.66995	Enzyme classification;Secondary metabolism	-	-0.573497
sbi-miR156.1	Sobic.009G013900	3	-1	112	132	UUGACAGAAGAGAGCGAGCAC	:::::::::: :::::.:	CCGCUCGCUCUCCUCUGUUAC	Cleavage	LOC_Os05g02130;LOC_Os05g02130;LOC_Os05g02130	Xb3#(LOC_Os05g02130);Xb3#(LOC_Os05g02130);Xb3#(LOC_Os05g02130)	Rice XA21 binding protein 3 is a ubiquitin ligase required for full Xa21-mediated disease resistance.#(disease resistance#(Xb3#(LOC_Os05g02130)));Rice XA21 binding protein 3 is a ubiquitin ligase required for full Xa21-mediated disease resistance.#(resistance#(Xb3#(LOC_Os05g02130)));These results indicate that Xb3 is necessary for full accumulation of the XA21 protein and for Xa21-mediated resist…	AT2G28840	XB3 ORTHOLOG 1 IN ARABIDOPSIS THALIANA (XBAT31)	Putative E3 Ub protein ligase; regulates thermoresponsive hypocotyl growth through mediating degradation of the thermosensor ELF3.	Zm00001eb355740	-	E3 ubiquitin-protein ligase XB3	70.6675	54.5439	91.4784	41.5466	37.849	Protein homeostasis	-	-0.565171
sbi-miR156.1	Sobic.002G247800	1	-1	1325	1345	UUGACAGAAGAGAGCGAGCAC	:::::: ::::::::::::::	GUGCUCUCUCUCUUCUGUCAA	Cleavage	LOC_Os09g31438;LOC_Os09g31438	OsSPL17#(LOC_Os09g31438);OsSPL17#(LOC_Os09g31438)	The uncovered miR156/529-OsSPL7/14/17-OsAOS2/OsNPR1 regulatory network provides a potential strategy to genetically improve rice disease resistance.#(disease#(OsSPL17#(LOC_Os09g31438)));The uncovered miR156/529-OsSPL7/14/17-OsAOS2/OsNPR1 regulatory network provides a potential strategy to genetically improve rice disease resistance.#(disease resistance#(OsSPL17#(LOC_Os09g31438)))	AT3G57920;AT2G42200	SQUAMOSA PROMOTER BINDING PROTEIN-LIKE 15 (SPL15)#(AT3G57920);SQUAMOSA PROMOTER BINDING PROTEIN-LIKE 9 (SPL9)#(AT2G42200)	Encodes a putative transcriptional regulator that is involved in the vegetative to reproductive phase transition. Expression is regulated by MIR156b.#(AT3G57920);Encodes a putative transcriptional regulator that is involved in the vegetative to reproductive phase transition. Expression is regulated by MIR156b. SPL activity nonautonomously inhibits initiation of new leaves at the shoot apical meri…	Zm00001eb316740	-	Squamosa promoter-binding-like protein 17	8.46788	7.22986	2.52576	0.505369	0.141671	RNA biosynthesis	SBP	-0.562813
sbi-miR156.1	Sobic.010G254200	1.5	-1	1513	1533	UUGACAGAAGAGAGCGAGCAC	:::::: :::::::::::::.	GUGCUCUCUCUCUUCUGUCAG	Cleavage	LOC_Os06g49010	-	-	AT1G27370;AT5G43270	SQUAMOSA PROMOTER BINDING PROTEIN-LIKE 10 (SPL10)#(AT1G27370);SQUAMOSA PROMOTER BINDING PROTEIN-LIKE 2 (SPL2)#(AT5G43270)	In conjunction with SPL11 and SPL2, SPL10 redundantly controls proper development of lateral organs in association with shoot maturation in the reproductive phase. SPL2, SPL10, and SPL11, suppress root regeneration with age by inhibiting wound-induced auxin biosynthesis. SPL10 also controls lamina shape during vegetative development.#(AT1G27370);Member of the SPL (squamosa-promoter binding protei…	Zm00001eb227180	LOC100283160	Squamosa-promoter binding protein-like protein	15.9628	14.1628	2.75045	1.01561	0.076433	RNA biosynthesis	SBP	-0.525291
sbi-miR156.1	Sobic.002G303300	3.5	-1	2883	2903	UUGACAGAAGAGAGCGAGCAC	::::::::::: ::::: .:	AUGCUCGCUCUCAUCUGUGGA	Cleavage	LOC_Os07g30020	-	-	-	-	-	Zm00001eb105000	-	FT-interacting protein 1	49.671	97.9356	20.9164	13.355	3.25057	-	-	-0.523316
sbi-miR156.1	Sobic.001G233700	3.5	-1	501	521	UUGACAGAAGAGAGCGAGCAC	:::.::::::::::::	GCCGUCGUUCUCUUCUGUCAC	Cleavage	LOC_Os10g30910	-	-	AT2G46060	-	transmembrane protein-like protein.	Zm00001eb222430	-	Transmembrane protein-related	10.0862	15.6407	3.11982	1.70689	0.754842	-	-	-0.513262
sbi-miR156.1	Sobic.010G140600	3.5	-1	153	173	UUGACAGAAGAGAGCGAGCAC	::::::. :::::::::: :	CUGCUCGUCCUCUUCUGUCUA	Cleavage	LOC_Os06g28970	-	-	AT5G17560	HOMOLOG OF E.COLI BOLA 4 (BOLA4)	BolA-like family protein.	Zm00001eb278180	-	protein BOLA4	31.8419	24.8398	12.5207	6.92386	7.10659	Coenzyme metabolism	-	-0.512771
sbi-miR156.1	Sobic.003G294300	4	-1	1330	1350	UUGACAGAAGAGAGCGAGCAC	:::.::: ::.::.::::::	GUGUUCGGACUUUUUUGUCAA	Cleavage	LOC_Os01g54390	-	-	AT1G53120	-	RNA binding protein located in the chloroplast.	Zm00001eb153060	-	Putative RNA-binding protein YlmH	13.2784	18.7806	5.79254	4.58937	3.63373	-	-	-0.50705
sbi-miR156.1	Sobic.007G193500	1.5	-1	1812	1832	UUGACAGAAGAGAGCGAGCAC	:::::: :::::::::::::.	GUGCUCUCUCUCUUCUGUCAG	Cleavage	LOC_Os08g41940;LOC_Os08g41940;LOC_Os08g41940;LOC_Os08g41940;LOC_Os08g41940;LOC_Os08g41940;LOC_Os08g41940;LOC_Os08g41940;LOC_Os08g41940;LOC_Os08g41940;LOC_Os08g41940;LOC_Os08g41940;LOC_Os08g41940;LOC_Os08g41940;LOC_Os08g41940	qGW8|OsSPL16|GW8#(LOC_Os08g41940);qGW8|OsSPL16|GW8#(LOC_Os08g41940);qGW8|OsSPL16|GW8#(LOC_Os08g41940);qGW8|OsSPL16|GW8#(LOC_Os08g41940);qGW8|OsSPL16|GW8#(LOC_Os08g41940);qGW8|OsSPL16|GW8#(LOC_Os08g41940);qGW8|OsSPL16|GW8#(LOC_Os08g41940);qGW8|OsSPL16|GW8#(LOC_Os08g41940);qGW8|OsSPL16|GW8#(LOC_Os08g41940);qGW8|OsSPL16|GW8#(LOC_Os08g41940);qGW8|OsSPL16|GW8#(LOC_Os08g41940);qGW8|OsSPL16|GW8#(LOC_Os0…	We also show that a marker-assisted strategy targeted at elite alleles of GS3 and OsSPL16 underlying grain size and shape can be effectively used to simultaneously improve grain quality and yield.#(grain quality#(qGW8|OsSPL16|GW8#(LOC_Os08g41940)));We also show that a marker-assisted strategy targeted at elite alleles of GS3 and OsSPL16 underlying grain size and shape can be effectively used to s…	-	-	-	Zm00001eb175190;Zm00001eb175150	-;TGA1#(Zm00001eb175150)	Teosinte glume architecture 1.#(Zm00001eb175190);Teosinte glume architecture 1 (Fragment).#(Zm00001eb175150)	4.30678	6.89377	1.10258	0.23699	0	RNA biosynthesis	SBP	-0.500975
sbi-miR156.1	Sobic.003G043800	4	-1	1520	1541	UUGACA-GAAGAGAGCGAGCAC	::.:.::::::::: ::::::	CUGUUUGCUCUCUUCAUGUCAA	Cleavage	LOC_Os01g14100	-	-	AT5G54860	-	Major facilitator superfamily protein.	Zm00001eb122330	-	Major facilitator superfamily protein (Fragment)	18.921	18.962	6.13418	5.05371	4.56185	Solute transport	-	-0.491581
sbi-miR156.1	Sobic.003G406600	1.5	-1	2174	2194	UUGACAGAAGAGAGCGAGCAC	:::::: :::::::::::::.	GUGCUCUCUCUCUUCUGUCAG	Cleavage	LOC_Os01g69830;LOC_Os01g69830	OsSPL2#(LOC_Os01g69830);OsSPL2#(LOC_Os01g69830)	The results suggested that H(2) O(2) accumulation in rice suppresses the expression of miR156, and induces the expression of its target genes, OsSPL2 and OsTIFY11b, whose proteins interact in the nucleus to regulate the expression of OsRBBI3-3, which is involved in plant defense.#(defense#(OsSPL2#(LOC_Os01g69830))); The results suggested that H(2) O(2) accumulation in rice suppresses the expressi…	-	-	-	Zm00001eb143110	-	SBP-type domain-containing protein	25.3103	32.1427	3.19254	1.01094	0.210485	RNA biosynthesis	SBP	-0.481484
sbi-miR156.1	Sobic.002G312300	2	-1	1009	1029	UUGACAGAAGAGAGCGAGCAC	::::: :::::::::::::	AUGCUCUCUCUCUUCUGUCAU	Cleavage	-	-	-	-	-	-	Zm00001eb322280	-	SBP-box transcription factor	53.916	48.6579	4.84009	0.42303	0	RNA biosynthesis	SBP	-0.476091
sbi-miR156.1	Sobic.004G032100	3	-1	818	838	UUGACAGAAGAGAGCGAGCAC	::: .:::.:::::::::::	GUGAAUGCUUUCUUCUGUCAA	Cleavage	LOC_Os02g04110	-	-	-	-	-	Zm00001eb231500	-	Transmembrane protein 53	12.9948	15.1814	4.04566	1.06321	2.14202	-	-	-0.460794
sbi-miR156.1	Sobic.006G171000	2	-1	1018	1038	UUGACAGAAGAGAGCGAGCAC	:::::: :::::::::::::	GUGCUCUCUCUCUUCUGUCAU	Cleavage	LOC_Os04g46580;LOC_Os04g46580;LOC_Os04g46580;LOC_Os04g46580;LOC_Os04g46580;LOC_Os04g46580;LOC_Os04g46580;LOC_Os04g46580;LOC_Os04g46580;LOC_Os04g46580;LOC_Os04g46580;LOC_Os04g46580;LOC_Os04g46580;LOC_Os04g46580;LOC_Os04g46580;LOC_Os04g46580;LOC_Os04g46580;LOC_Os04g46580;LOC_Os04g46580;LOC_Os04g46580;LOC_Os04g46580	OsSPL7#(LOC_Os04g46580);OsSPL7#(LOC_Os04g46580);OsSPL7#(LOC_Os04g46580);OsSPL7#(LOC_Os04g46580);OsSPL7#(LOC_Os04g46580);OsSPL7#(LOC_Os04g46580);OsSPL7#(LOC_Os04g46580);OsSPL7#(LOC_Os04g46580);OsSPL7#(LOC_Os04g46580);OsSPL7#(LOC_Os04g46580);OsSPL7#(LOC_Os04g46580);OsSPL7#(LOC_Os04g46580);OsSPL7#(LOC_Os04g46580);OsSPL7#(LOC_Os04g46580);OsSPL7#(LOC_Os04g46580);OsSPL7#(LOC_Os04g46580);OsSPL7#(LOC_Os0…	Plants over-expressing OsSPL7 had a reduced tiller number, while OsSPL7 RNAi plants had an increased tiller number and a reduced height.#(tiller#(OsSPL7#(LOC_Os04g46580)));Genetic analysis showed that OsSPL7 is a target of miR156f that regulates plant architecture.#(architecture#(OsSPL7#(LOC_Os04g46580)));Plants over-expressing OsSPL7 had a reduced tiller number, while OsSPL7 RNAi plants had an i…	-	-	-	Zm00001eb429720	-	SBP transcription factor (Fragment)	0.0935035	0.139901	0.00801894	0	0	RNA biosynthesis	SBP	-0.450038
sbi-miR156.1	Sobic.002G312200	2	-1	665	685	UUGACAGAAGAGAGCGAGCAC	::::: :::::::::::::	AUGCUCUCUCUCUUCUGUCAU	Cleavage	-	-	-	-	-	-	Zm00001eb105640	-	Squamosa promoter-binding-like protein 13	21.5876	34.9386	1.73293	0.381016	0	RNA biosynthesis	SBP	-0.445841
sbi-miR156.1	Sobic.004G050600	2	-1	143	163	UUGACAGAAGAGAGCGAGCAC	: :::: .::::::.::::::	GAGCUCUUUCUCUUUUGUCAA	Cleavage	LOC_Os02g06660	-	-	AT4G04900;AT4G21745	ROP-INTERACTIVE CRIB MOTIF-CONTAINING PROTEIN 10 (RIC10)#(AT4G04900);-	encodes a member of a novel protein family that contains contain a CRIB (for Cdc42/Rac-interactive binding) motif required for their specific interaction with GTP-bound Rop1 (plant-specific Rho GTPase). Most similar to RIC9 and RIC11 (subfamily group I). Gene is expressed predominantly in roots, leaves, and seedlings.#(AT4G04900);PAK-box/P21-Rho-binding family protein.#(AT4G21745)	Zm00001eb232750	-	CRIB domain-containing protein	0.0864617	0.0560184	0	0	0	-	-	-0.424829
sbi-miR156.1	Sobic.005G072900	3	-1	57	77	UUGACAGAAGAGAGCGAGCAC	::::.:::.: ::::::::.	CUGCUUGCUUUGUUCUGUCAG	Translation	-	-	-	-	-	-	-	-	-	0.0697231	0.112471	0	0	0	-	-	-0.421771
sbi-miR156.1	Sobic.007G139000	3.5	-1	1416	1436	UUGACAGAAGAGAGCGAGCAC	:::: :.:::.::.:::::	CUGCUGGUUCUUUUUUGUCAC	Cleavage	-	-	-	-	-	-	Zm00001eb041310;Zm00001eb180020	-;-	Mini zinc finger protein 2.#(Zm00001eb041310);Mini zinc finger protein 2.#(Zm00001eb180020)	4.01862	7.99626	0.0339696	0.0338005	0	RNA biosynthesis	ZF-HD	-0.408475
sbi-miR156.1	Sobic.007G210200	1	-1	1245	1265	UUGACAGAAGAGAGCGAGCAC	:::::: ::::::::::::::	GUGCUCUCUCUCUUCUGUCAA	Cleavage	LOC_Os08g39890;LOC_Os08g39890;LOC_Os08g39890;LOC_Os08g39890;LOC_Os08g39890;LOC_Os08g39890;LOC_Os08g39890;LOC_Os08g39890;LOC_Os08g39890;LOC_Os08g39890;LOC_Os08g39890;LOC_Os08g39890;LOC_Os08g39890;LOC_Os08g39890;LOC_Os08g39890;LOC_Os08g39890;LOC_Os08g39890;LOC_Os08g39890;LOC_Os08g39890;LOC_Os08g39890;LOC_Os08g39890;LOC_Os08g39890;LOC_Os08g39890;LOC_Os08g39890;LOC_Os08g39890;LOC_Os08g39890;LOC_Os08g…	OsSPL14|IPA1|WFP#(LOC_Os08g39890);OsSPL14|IPA1|WFP#(LOC_Os08g39890);OsSPL14|IPA1|WFP#(LOC_Os08g39890);OsSPL14|IPA1|WFP#(LOC_Os08g39890);OsSPL14|IPA1|WFP#(LOC_Os08g39890);OsSPL14|IPA1|WFP#(LOC_Os08g39890);OsSPL14|IPA1|WFP#(LOC_Os08g39890);OsSPL14|IPA1|WFP#(LOC_Os08g39890);OsSPL14|IPA1|WFP#(LOC_Os08g39890);OsSPL14|IPA1|WFP#(LOC_Os08g39890);OsSPL14|IPA1|WFP#(LOC_Os08g39890);OsSPL14|IPA1|WFP#(LOC_Os0…	Two studies describe how regulatory variation at the rice gene OsSPL14 can lead to altered plant morphology and improve grain yield.#(yield#(OsSPL14|IPA1|WFP#(LOC_Os08g39890)));We demonstrate that a point mutation in OsSPL14 perturbs OsmiR156-directed regulation of OsSPL14, generating an 'ideal' rice plant with a reduced tiller number, increased lodging resistance and enhanced grain yield.#(lodgi…	AT3G57920;AT2G42200	SQUAMOSA PROMOTER BINDING PROTEIN-LIKE 15 (SPL15)#(AT3G57920);SQUAMOSA PROMOTER BINDING PROTEIN-LIKE 9 (SPL9)#(AT2G42200)	Encodes a putative transcriptional regulator that is involved in the vegetative to reproductive phase transition. Expression is regulated by MIR156b.#(AT3G57920);Encodes a putative transcriptional regulator that is involved in the vegetative to reproductive phase transition. Expression is regulated by MIR156b. SPL activity nonautonomously inhibits initiation of new leaves at the shoot apical meri…	Zm00001eb035030	-	Squamosa promoter-binding-like protein 17	15.3145	38.4526	1.59527	1.0895	0.702934	RNA biosynthesis	SBP	-0.395921
sbi-miR156.1	Sobic.006G110600	4.5	-1	1273	1294	UUGACA-GAAGAGAGCGAGCAC	::.:.:::::.::: ::::::	AUGUUUGCUCUUUUCAUGUCAA	Cleavage	-	-	-	-	-	-	-	-	-	2.24937	1.89533	1.064	1.01256	1.17842	-	-	-0.336173
sbi-miR156.1	Sobic.010G030800	4.5	-1	4342	4362	UUGACAGAAGAGAGCGAGCAC	:::.:.:::::.::.: :..:	GUGUUUGCUCUUUUUUUUUGA	Cleavage	LOC_Os06g04920;LOC_Os06g04920;LOC_Os06g04920	OsZFP1|SRZ3#(LOC_Os06g04920);OsZFP1|SRZ3#(LOC_Os06g04920);OsZFP1|SRZ3#(LOC_Os06g04920)	The transgenic Arabidopsis plants also bolted later than wild type plants upon ABA treatment, suggesting that the function of the OsZFP1 gene may be regulated by ABA.#(ABA#(OsZFP1|SRZ3#(LOC_Os06g04920)));This result implies that OsZFP1 gene may function as a repressor, which probably inhibits the expression of some salt-inducible genes.#(salt#(OsZFP1|SRZ3#(LOC_Os06g04920)));Transgenic analysis of…	-	-	-	Zm00001eb377420	-	TATA-binding protein-associated factor 2N-like isoform X1	24.689	10.6793	2.44132	3.02162	5.51018	-	-	-0.256216
sbi-miR156.1	Sobic.005G120600	2	-1	950	970	UUGACAGAAGAGAGCGAGCAC	:::::: :::::::::::::	GUGCUCUCUCUCUUCUGUCAU	Cleavage	LOC_Os11g30370	-	-	AT5G50570;AT5G50670	SQUAMOSA PROMOTER-BINDING PROTEIN LIKE 13A (SPL13A)#(AT5G50570);SQUAMOSA PROMOTER-BINDING PROTEIN LIKE 13B (SPL13B)#(AT5G50670)	Together with SPL13B involved in floral transition. Expression reduced by Verticillium dahliae SRNAs which affects the plant's miR157d which targets SPL13A and B.#(AT5G50570);Together with SPL13B involved in floral transition. Expression reduced by Verticillium dahliae SRNAs which affects the plant's miR157d which targets SPL13A and B.#(AT5G50670)	Zm00001eb169410	-	squamosa promoter-binding-like protein 16	5.35797	6.40009	2.40113	3.53539	5.90448	RNA biosynthesis	SBP	0.369262
sbi-miR156.1	Sobic.010G231900	4	-1	1184	1204	UUGACAGAAGAGAGCGAGCAC	:::.:::.:.::::.:: ::.	GUGUUCGUUUUCUUUUGCCAG	Cleavage	-	-	-	-	-	-	-	-	-	3.26625	3.33622	15.4235	16.859	108.221	-	-	0.993781
sbi-miR156.2	Sobic.006G099300	2.5	-1	1187	1208	GCUCGCUUCUCUUUCUGUCAGC	:::::::::.:::: :::::.	UCUGACAGAAGGAGAUGCGAGU	Cleavage	-	-	-	-	-	-	-	-	-	0.074365	0.107685	0.25824	0.173307	0.471313	-	-	-0.502773
sbi-miR156.2	Sobic.006G177800	3	-1	2231	2252	GCUCGCUUCUCUUUCUGUCAGC	::. ::::.::::::.:.::	CGUGGGAGAAGGAGAAGUGGGC	Cleavage	LOC_Os04g47360	-	-	-	-	-	Zm00001eb074080	-	Prolyl endopeptidase	0.127903	0.257204	0.556744	2.51313	0.392085	Enzyme classification	-	-0.363089
sbi-miR156.2	Sobic.003G117100	4.5	-1	1656	1677	GCUCGCUUCUCUUUCUGUCAGC	::::::. .:::.:.::.:::	GCUGACGAGAAGGGGAGUGAGA	Cleavage	LOC_Os07g44190	-	-	AT3G57150	HOMOLOGUE OF NAP57 (NAP57)	Encodes a putative pseudouridine synthase (NAP57).	Zm00001eb333520	-	PUA domain-containing protein	39.5428	31.9323	124.588	48.842	57.093	RNA processing	-	-0.314142
sbi-miR156.2	Sobic.002G390100	5	-1	571	592	GCUCGCUUCUCUUUCUGUCAGC	:::::::::.: .::::: ::	GCUGACAGAGAAGGAAGCCAGA	Translation	LOC_Os07g44290	-	-	AT1G48260;AT3G17510	CBL-INTERACTING PROTEIN KINASE 17 (CIPK17)#(AT1G48260);CBL-INTERACTING PROTEIN KINASE 1 (CIPK1)#(AT3G17510)	Encodes a member of the SNF1-related kinase (SnRK) gene family (SnRK3.21), which has also been reported as a member of the CBL-interacting protein kinases (CIPK17).#(AT1G48260);Encodes a CBL-interacting protein kinase. Specifically interacts with ECT1 and ECT2.#(AT3G17510)	Zm00001eb110020	-	Non-specific serine/threonine protein kinase	8.19983	24.4188	2.81397	4.37831	3.59951	Enzyme classification;Multi-process regulation;Protein modification	-	-0.0298315
sbi-miR156.2	Sobic.001G215600	5	-1	2645	2666	GCUCGCUUCUCUUUCUGUCAGC	:.:::.::..::::.::.::	GUUGAUAGGGAGAGGAGUGAAA	Cleavage	LOC_Os10g34230;LOC_Os10g34230;LOC_Os10g34230;LOC_Os10g34230;LOC_Os10g34230;LOC_Os10g34230;LOC_Os10g34230;LOC_Os10g34230;LOC_Os10g34230;LOC_Os10g34230;LOC_Os10g34230;LOC_Os10g34230;LOC_Os10g34230;LOC_Os10g34230;LOC_Os10g34230;LOC_Os10g34230;LOC_Os10g34230;LOC_Os10g34230	OsCKX3#(LOC_Os10g34230);OsCKX3#(LOC_Os10g34230);OsCKX3#(LOC_Os10g34230);OsCKX3#(LOC_Os10g34230);OsCKX3#(LOC_Os10g34230);OsCKX3#(LOC_Os10g34230);OsCKX3#(LOC_Os10g34230);OsCKX3#(LOC_Os10g34230);OsCKX3#(LOC_Os10g34230);OsCKX3#(LOC_Os10g34230);OsCKX3#(LOC_Os10g34230);OsCKX3#(LOC_Os10g34230);OsCKX3#(LOC_Os10g34230);OsCKX3#(LOC_Os10g34230);OsCKX3#(LOC_Os10g34230);OsCKX3#(LOC_Os10g34230);OsCKX3#(LOC_Os1…	Phenotypic analysis showed that rice osckx3 mutants had smaller leaf angles, while the overexpression lines (OsCKX3-OE) had larger leaf angles.#(leaf#(OsCKX3#(LOC_Os10g34230))); Histological sections indicated that the leaf inclination changes in the osckx3 and OsCKX3-OE lines resulted from asymmetric proliferation of the cells and vascular bundles in the lamina joint.#(leaf#(OsCKX3#(LOC_Os10g342…	-	-	-	Zm00001eb045490	-	Cytokinin dehydrogenase	0.550819	2.15267	0.129521	0.0553935	0.0279707	Enzyme classification;Phytohormone action.cytokinin	-	-0.0201065
sbi-miR156.2	Sobic.004G270900	3.5	-1	860	881	GCUCGCUUCUCUUUCUGUCAGC	:::: :::.::::.:: ::::	ACUGAAAGAGAGAGGAGGGAGC	Cleavage	LOC_Os04g51070;LOC_Os04g51070;LOC_Os04g51070;LOC_Os04g51070;LOC_Os04g51070;LOC_Os04g51070;LOC_Os04g51070;LOC_Os04g51070;LOC_Os04g51070;LOC_Os04g51070;LOC_Os04g51070;LOC_Os04g51070;LOC_Os04g51070;LOC_Os04g51070;LOC_Os04g51070;LOC_Os04g51070;LOC_Os04g51070;LOC_Os04g51070;LOC_Os04g51070;LOC_Os04g51070;LOC_Os04g51070;LOC_Os04g51070;LOC_Os04g51070;LOC_Os04g51070	DTD|EAT1#(LOC_Os04g51070);DTD|EAT1#(LOC_Os04g51070);DTD|EAT1#(LOC_Os04g51070);DTD|EAT1#(LOC_Os04g51070);DTD|EAT1#(LOC_Os04g51070);DTD|EAT1#(LOC_Os04g51070);DTD|EAT1#(LOC_Os04g51070);DTD|EAT1#(LOC_Os04g51070);DTD|EAT1#(LOC_Os04g51070);DTD|EAT1#(LOC_Os04g51070);DTD|EAT1#(LOC_Os04g51070);DTD|EAT1#(LOC_Os04g51070);DTD|EAT1#(LOC_Os04g51070);DTD|EAT1#(LOC_Os04g51070);DTD|EAT1#(LOC_Os04g51070);DTD|EAT1#…	eat1 exhibits delayed tapetal cell death and aborted pollen formation.#(tapetal#(DTD|EAT1#(LOC_Os04g51070)));EAT1 promotes tapetal cell death by regulating aspartic proteases during male reproductive development in rice.#(tapetal#(DTD|EAT1#(LOC_Os04g51070)));eat1 exhibits delayed tapetal cell death and aborted pollen formation.#(cell death#(DTD|EAT1#(LOC_Os04g51070)));EAT1 promotes tapetal cell d…	AT2G31210;AT1G06170;AT2G31220	BASIC HELIX LOOP HELIX PROTEIN 91 (BHLH091)#(AT2G31210);BASIC HELIX LOOP HELIX PROTEIN 89 (BHLH089)#(AT1G06170);-	Encodes a bHLH transcription factor that together with bHLH089 and bHLH010 is important for the normal transcriptome of the developing Arabidopsis anther, possibly by forming a feed-forward loop with DYT1.#(AT2G31210);Encodes a bHLH transcription factor that together with bHLH010 and bHLH091 is important for the normal transcriptome of the developing Arabidopsis anther, possibly by forming a feed…	Zm00001eb251650	-	transcription factor bHLH91-like	3.48436	12.6154	1.13005	0.722535	0.0408907	RNA biosynthesis	bHLH	-0.0122757
sbi-miR156.2	Sobic.003G296300	4.5	-1	243	264	GCUCGCUUCUCUUUCUGUCAGC	:: :::::::::.: :.:	AGAGAGAGAAAGAGAGGAGGGA	Cleavage	LOC_Os01g54600;LOC_Os01g54600;LOC_Os01g54600;LOC_Os01g54600;LOC_Os01g54600;LOC_Os01g54600;LOC_Os01g54600;LOC_Os01g54600;LOC_Os01g54600;LOC_Os01g54600;LOC_Os01g54600;LOC_Os01g54600;LOC_Os01g54600;LOC_Os01g54600;LOC_Os01g54600;LOC_Os01g54600;LOC_Os01g54600;LOC_Os01g54600;LOC_Os01g54600;LOC_Os01g54600;LOC_Os01g54600;LOC_Os01g54600;LOC_Os01g54600;LOC_Os01g54600;LOC_Os01g54600;LOC_Os01g54600;LOC_Os01g…	OsWRKY13|WRKY13#(LOC_Os01g54600);OsWRKY13|WRKY13#(LOC_Os01g54600);OsWRKY13|WRKY13#(LOC_Os01g54600);OsWRKY13|WRKY13#(LOC_Os01g54600);OsWRKY13|WRKY13#(LOC_Os01g54600);OsWRKY13|WRKY13#(LOC_Os01g54600);OsWRKY13|WRKY13#(LOC_Os01g54600);OsWRKY13|WRKY13#(LOC_Os01g54600);OsWRKY13|WRKY13#(LOC_Os01g54600);OsWRKY13|WRKY13#(LOC_Os01g54600);OsWRKY13|WRKY13#(LOC_Os01g54600);OsWRKY13|WRKY13#(LOC_Os01g54600);OsW…	Furthermore, OsWRKY13 will provide a transgenic tool for engineering wider-spectrum and whole-growth-stage resistance rice in breeding programs.#(growth#(OsWRKY13|WRKY13#(LOC_Os01g54600)));At least 39 transcription factor genes were influenced by OsWRKY13, and 30 of them were downregulated.#(transcription factor#(OsWRKY13|WRKY13#(LOC_Os01g54600)));The promoters of OsWRKY13-upregulated genes were …	AT3G58710	WRKY DNA-BINDING PROTEIN 69 (WRKY69)	member of WRKY Transcription Factor; Group II-e. Involved in thermomorphogenesis.	Zm00001eb370960	-	WRKY domain-containing protein	24.6533	10.6052	25.5106	10.5074	46.3815	RNA biosynthesis	WRKY	0.042665
sbi-miR156.2	Sobic.002G262100	2.5	-1	1875	1896	GCUCGCUUCUCUUUCUGUCAGC	:...::::::::::::::	AAGGGUGGAAAGAGAAGCGAGA	Cleavage	LOC_Os12g29660	-	-	AT4G16630	-	DEA(D/H)-box RNA helicase family protein.	Zm00001eb318210	-	ATP-dependent RNA helicase DRS1	10.5664	14.461	11.3162	6.14111	6.69423	-	-	0.118344
sbi-miR156.2	Sobic.002G042500	4	-1	426	447	GCUCGCUUCUCUUUCUGUCAGC	:::: ::.:::::.::.:::.	GCUGUGAGGAAGAGGAGUGAGU	Cleavage	-	-	-	AT5G16715	EMBRYO DEFECTIVE 2247 (EMB2247)	protein EMBRYO DEFECTIVE 2247.	Zm00001eb117220	-	Valyl-tRNA synthetase	6.6332	11.4215	5.4133	2.07373	0.320919	Enzyme classification;Protein biosynthesis	-	0.189354
sbi-miR156.2	Sobic.005G032000	5	-1	19	40	GCUCGCUUCUCUUUCUGUCAGC	:::::..:.:::::: : :::.	GCUGAUGGGAAGAGAUGGGAGU	Cleavage	LOC_Os11g04860	-	-	-	-	-	Zm00001eb196550	-	Glycosyltransferase	0.0178911	0.0364587	0	0	0	-	-	0.241272
sbi-miR156.2	Sobic.006G199200	2.5	-1	859	880	GCUCGCUUCUCUUUCUGUCAGC	:::::::::.::.:: :::	UUGGACAGAAAGGGAGGCCAGC	Cleavage	LOC_Os04g50720	-	-	AT1G32340	NDR1/HIN1-LIKE 8 (NHL8)	Encodes a protein whose sequence is similar to tobacco hairpin-induced gene (HIN1) and Arabidopsis non-race specific disease resistance gene (NDR1). Expression is not detected under normal conditions and in response to cucumber mosaic virus or spermine.	Zm00001eb072220	-	RBR-type E3 ubiquitin transferase	17.6107	22.1304	16.1674	11.0806	7.35572	Protein homeostasis	-	0.266069
sbi-miR156.2	Sobic.004G204900	3	-1	102	123	GCUCGCUUCUCUUUCUGUCAGC	:: :::.:::::.::::: ::.	GCGGACGGAAAGGGAAGCCAGU	Cleavage	LOC_Os02g38840	-	-	AT3G27300;AT5G40760	GLUCOSE-6-PHOSPHATE DEHYDROGENASE 5 (G6PD5)#(AT3G27300);GLUCOSE-6-PHOSPHATE DEHYDROGENASE 6 (G6PD6)#(AT5G40760)	Glucose-6-phosphate dehydrogenase. 5Alternative splice forms At3g27300.4 and At3g27300.5 encode N-terminally extended proteoforms which localise at the cytosolic face of the endoplasmic reticulum (PMID:36119606).#(AT3G27300);Encodes a cytosolic glucose-6-phosphate dehydrogenase that is insensitive to reduction by DTT and whose mRNA is expressed ubiquitously. The mRNA is cell-to-cell mobile.#(AT5G…	Zm00001eb246350	-	Glucose-6-phosphate 1-dehydrogenase	43.4917	55.9036	32.2205	30.2596	26.9323	Carbohydrate metabolism;Enzyme classification	-	0.269235
sbi-miR156.2	Sobic.010G004100	2.5	-1	1010	1031	GCUCGCUUCUCUUUCUGUCAGC	::::::::::.::::.:.	CCCCACAGAAAGAGGAGCGGGU	Cleavage	-	-	-	AT5G47480;AT5G47490	MAIGO 5 (MAG5)#(AT5G47480);-	RGPR-related protein; SEC16A homolog. Part of endomembrane trafficking system.#(AT5G47480);RGPR-like protein.#(AT5G47490)	Zm00001eb268610	LOC100383190	Protein transport protein sec16	53.1585	81.4827	21.5583	14.3509	3.07907	Vesicle trafficking	-	0.321221
sbi-miR156.2	Sobic.002G275700	4	-1	322	343	GCUCGCUUCUCUUUCUGUCAGC	::::. .:::.:::..:::.::	GCUGGGGGAAGGAGGGGCGGGC	Cleavage	LOC_Os09g36270	-	-	AT4G32180	PANTOTHENATE KINASE 2 (PANK2)	Encodes a protein with pantothenate kinase activity.	Zm00001eb319630	-	Pantothenate kinase 2	41.6414	63.9929	15.2896	11.5778	4.06939	Coenzyme metabolism;Enzyme classification	-	0.321451
sbi-miR156.2	Sobic.005G035100	3.5	-1	1020	1041	GCUCGCUUCUCUUUCUGUCAGC	: :::.::: .:.::::.::::	GGUGAUAGAUGGGGAAGUGAGC	Cleavage	-	-	-	-	-	-	-	-	-	0.0814127	0.124608	0	0	0	-	-	0.384548
sbi-miR156.2	Sobic.001G455000	3	-1	2022	2043	GCUCGCUUCUCUUUCUGUCAGC	::::: ::::::: :.::::	CAUGACACAAAGAGACGUGAGC	Cleavage	LOC_Os03g11720	-	-	AT5G63840	GLUCOSIDASE 2 ALPHA (GSCIIALPHA)	Encodes the alpha-subunit of a glucosidase II enzyme. A mutant has been shown to be specifically impaired in cellulose production.	Zm00001eb008780	-	probable glucan 1	74.0664	81.4557	65.4346	27.8126	15.0966	Enzyme classification;Protein modification	-	0.403619
sbi-miR156.2	Sobic.001G373000	3	-1	565	586	GCUCGCUUCUCUUUCUGUCAGC	:::.:::::::::::: :::	ACUGGCAGAAAGAGAAGAGAGA	Cleavage	LOC_Os03g22690	-	-	AT2G41620;AT3G57350	-;-	Nucleoporin interacting component (Nup93/Nic96-like) family protein.#(AT2G41620);Nucleoporin interacting component (Nup93/Nic96-like) family protein.#(AT3G57350)	Zm00001eb016760	-	Nuclear pore protein	29.3831	35.5382	19.6679	10.4583	4.81047	Protein translocation	-	0.412294
sbi-miR156.2	Sobic.002G048200	3.5	-1	1238	1259	GCUCGCUUCUCUUUCUGUCAGC	:: ::.::.:::. .:::::::	GCGGAUAGGAAGGCGAGCGAGC	Cleavage	LOC_Os07g07620	-	-	AT5G03800	EMBRYO DEFECTIVE 175 (EMB175)	Encodes a protein with a large central domain of 14 internal pentatricopeptide motifs (some degenerate) arranged in tandem. Mutations in this locus result in embryo lethality.	Zm00001eb117060	-	Pentatricopeptide repeat-containing protein	10.6115	13.1633	6.44578	1.81213	2.78692	-	-	0.416235
sbi-miR156.2	Sobic.009G008200	2	-1	301	322	GCUCGCUUCUCUUUCUGUCAGC	: :.:.:::::.::.::::::	CCGGGCGGAAAGGGAGGCGAGC	Cleavage	LOC_Os05g01780	-	-	AT3G48260	WITH NO LYSINE (K) KINASE 3 (WNK3)	Encodes a member of the WNK family (9 members in all) of protein kinases, the structural design of which is clearly distinct from those of other known protein kinases, such as receptor-like kinases and mitogen-activated protein kinases.	Zm00001eb267090	LOC103629262	Non-specific serine/threonine protein kinase	23.0732	30.2651	8.14629	6.32005	2.13997	Enzyme classification;Multi-process regulation	-	0.42144
sbi-miR156.2	Sobic.001G335300	5	-1	1982	2002	GCUCGCUUCUCUUUCUGUCAGC	::::::::::: ::.::: :::	GCUGACAGAAA-AGGAGCUAGC	Translation	LOC_Os06g30320	-	-	AT1G79150	NUCLEOLAR COMPLEX ASSOCIATED 3 (NOC3)	binding protein.	Zm00001eb020130	-	nucleolar complex protein 3 homolog	37.6387	46.2436	16.6445	8.50348	4.54622	Protein biosynthesis	-	0.454908
sbi-miR156.2	Sobic.006G021200	5	-1	49	70	GCUCGCUUCUCUUUCUGUCAGC	:::::..::.::.::.::: :	GCUGAUGGAGAGGGAGGCGCGG	Cleavage	-	-	-	-	-	-	-	-	-	22.8162	28.5949	3.74526	2.88306	1.54434	-	-	0.4769
sbi-miR156.2	Sobic.003G216166	4.5	-1	136	157	GCUCGCUUCUCUUUCUGUCAGC	::::. ::::::: :.:::.:.	GCUGGGAGAAAGACAGGCGGGU	Cleavage	-	-	-	-	-	-	-	-	-	1.05983	1.22826	0.0402078	0.359695	0.248491	Solute transport	-	0.503715
sbi-miR156.2	Sobic.003G216232	4.5	-1	2734	2755	GCUCGCUUCUCUUUCUGUCAGC	::::. ::::::: :.:::.:.	GCUGGGAGAAAGACAGGCGGGU	Cleavage	LOC_Os01g42380;LOC_Os01g42380;LOC_Os01g42380;LOC_Os01g42380;LOC_Os01g42380;LOC_Os01g42380;LOC_Os01g42380;LOC_Os01g42380;LOC_Os01g42380;LOC_Os01g42380;LOC_Os01g42380;LOC_Os01g42380;LOC_Os01g42380;LOC_Os01g42380;LOC_Os01g42380;LOC_Os01g42380;LOC_Os01g42380;LOC_Os01g42380;LOC_Os01g42380;LOC_Os01g42380;LOC_Os01g42380;LOC_Os01g42380;LOC_Os01g42380;LOC_Os01g42380;LOC_Os01g42380	Ospdr9|OsABCG36#(LOC_Os01g42380);Ospdr9|OsABCG36#(LOC_Os01g42380);Ospdr9|OsABCG36#(LOC_Os01g42380);Ospdr9|OsABCG36#(LOC_Os01g42380);Ospdr9|OsABCG36#(LOC_Os01g42380);Ospdr9|OsABCG36#(LOC_Os01g42380);Ospdr9|OsABCG36#(LOC_Os01g42380);Ospdr9|OsABCG36#(LOC_Os01g42380);Ospdr9|OsABCG36#(LOC_Os01g42380);Ospdr9|OsABCG36#(LOC_Os01g42380);Ospdr9|OsABCG36#(LOC_Os01g42380);Ospdr9|OsABCG36#(LOC_Os01g42380);Osp…	Hypoxic stress also induced ospdr9 in rice roots, salt stress induced ospdr9 at low levels but cold and heat shock had no effect.#(salt#(Ospdr9|OsABCG36#(LOC_Os01g42380)));Polyethylene glycol and the heavy metals Cd (20 microM) and Zn (30 microM) rapidly and markedly induced ospdr9 in roots of rice seedlings.#(seedling#(Ospdr9|OsABCG36#(LOC_Os01g42380)));The plant growth regulator jasmonic acid, …	-	-	-	-	-	-	3.50491	3.85229	0.678742	1.97863	0.886006	Solute transport	-	0.507418
sbi-miR156.2	Sobic.001G331900	3	-1	886	907	GCUCGCUUCUCUUUCUGUCAGC	::::::::::::::::	AGCGUAAGAAAGAGAAGCGAGC	Cleavage	LOC_Os09g01690	-	-	AT2G15270	-	PRKR-interacting protein.	Zm00001eb393310	-	PRKR-interacting protein 1-like	10.8624	11.5335	6.8027	4.71917	7.1494	-	-	0.512671
sbi-miR156.2	Sobic.003G152400	4	-1	4512	4533	GCUCGCUUCUCUUUCUGUCAGC	::::..:::: : ::::::::	UCUGAUGGAAACAAAAGCGAGC	Translation	LOC_Os01g22390	-	-	AT5G18525	GREEN FLUORESCENT SEED 12 (GFS12)	Encodes a BEACH domain containing protein that is involved in targeting storage proteins to the protein storage vacuoles and effector triggered immunity to Psuedomonas syringae.	Zm00001eb131030	-	Inactive serine/threonine-protein kinase lvsG	27.3485	31.1358	7.40656	5.52583	1.36835	Enzyme classification;Protein homeostasis	-	0.523922
sbi-miR156.2	Sobic.009G135600	2.5	-1	670	691	GCUCGCUUCUCUUUCUGUCAGC	:::::::.::::.::: ::	AAAGACAGAAGGAGAGGCGUGC	Cleavage	LOC_Os05g33850	-	-	AT2G26920;AT5G12120	-;-	Ubiquitin-associated/translation elongation factor EF1B protein.#(AT2G26920);Ubiquitin-associated/translation elongation factor EF1B protein.#(AT5G12120)	Zm00001eb287870	-	UBA domain-containing protein	53.387	54.3123	33.3438	24.5992	17.1945	-	-	0.560227
sbi-miR156.2	Sobic.003G216000	4.5	-1	2749	2770	GCUCGCUUCUCUUUCUGUCAGC	::::. ::::::: :.:::.:.	GCUGGGAGAAAGACAGGCGGGU	Cleavage	LOC_Os01g42380;LOC_Os01g42380;LOC_Os01g42380;LOC_Os01g42380;LOC_Os01g42380;LOC_Os01g42380;LOC_Os01g42380;LOC_Os01g42380;LOC_Os01g42380;LOC_Os01g42380;LOC_Os01g42380;LOC_Os01g42380;LOC_Os01g42380;LOC_Os01g42380;LOC_Os01g42380;LOC_Os01g42380;LOC_Os01g42380;LOC_Os01g42380;LOC_Os01g42380;LOC_Os01g42380;LOC_Os01g42380;LOC_Os01g42380;LOC_Os01g42380;LOC_Os01g42380;LOC_Os01g42380	Ospdr9|OsABCG36#(LOC_Os01g42380);Ospdr9|OsABCG36#(LOC_Os01g42380);Ospdr9|OsABCG36#(LOC_Os01g42380);Ospdr9|OsABCG36#(LOC_Os01g42380);Ospdr9|OsABCG36#(LOC_Os01g42380);Ospdr9|OsABCG36#(LOC_Os01g42380);Ospdr9|OsABCG36#(LOC_Os01g42380);Ospdr9|OsABCG36#(LOC_Os01g42380);Ospdr9|OsABCG36#(LOC_Os01g42380);Ospdr9|OsABCG36#(LOC_Os01g42380);Ospdr9|OsABCG36#(LOC_Os01g42380);Ospdr9|OsABCG36#(LOC_Os01g42380);Osp…	Hypoxic stress also induced ospdr9 in rice roots, salt stress induced ospdr9 at low levels but cold and heat shock had no effect.#(salt#(Ospdr9|OsABCG36#(LOC_Os01g42380)));Polyethylene glycol and the heavy metals Cd (20 microM) and Zn (30 microM) rapidly and markedly induced ospdr9 in roots of rice seedlings.#(seedling#(Ospdr9|OsABCG36#(LOC_Os01g42380)));The plant growth regulator jasmonic acid, …	-	-	-	-	-	-	3.22347	2.81201	1.00577	1.02584	0.867515	Solute transport	-	0.70779
sbi-miR156.2	Sobic.010G189100	4.5	-1	1527	1548	GCUCGCUUCUCUUUCUGUCAGC	.:::..::.:::::::.::	UUUGAUGGAGAGAGAAGUGACU	Cleavage	LOC_Os06g40740	-	-	AT5G50350	-	hypothetical protein.	Zm00001eb388520	-	zinc finger C3H1 domain-containing protein-like	42.9923	30.1549	21.3255	19.88	7.80494	-	-	0.793418
sbi-miR156.2	Sobic.006G219500	3.5	-1	2398	2419	GCUCGCUUCUCUUUCUGUCAGC	::::: :::: ::::::::::	GCUGAGAGAAUGAGAAGCGAGG	Cleavage	LOC_Os04g52920;LOC_Os04g52920;LOC_Os04g52920;LOC_Os04g52920	GSD1#(LOC_Os04g52920);GSD1#(LOC_Os04g52920);GSD1#(LOC_Os04g52920);GSD1#(LOC_Os04g52920)	Grain setting defect 1, encoding a remorin protein, affects the grain setting in rice through regulating plasmodesmatal conductance.#(grain setting#(GSD1#(LOC_Os04g52920)));Together, our results suggest that GSD1 may play a role in regulating photoassimilate translocation through the symplastic pathway to impact grain setting in rice.#(photoassimilate translocation#(GSD1#(LOC_Os04g52920)));GSD1 w…	AT1G30320	-	Remorin family protein.	Zm00001eb070390	-	MAP7 domain-containing protein 1	58.9742	38.8667	3.30749	2.0914	0.0234264	-	-	0.799584
sbi-miR156.2	Sobic.001G388200	4.5	-1	412	433	GCUCGCUUCUCUUUCUGUCAGC	:.:::..:::.:: :: :::::	GUUGAUGGAAGGAAAAACGAGC	Cleavage	LOC_Os03g20670	-	-	AT3G03610	ENGULFMENT AND CELL MOTILITY (ELMO) DOMAIN F (ELMOD_F)	Member of the ELMOD family.	Zm00001eb015380	-	ELMO domain-containing protein	65.0981	34.5446	18.0299	16.9895	7.04866	-	-	0.901465
sbi-miR156.2	Sobic.003G305000	2	-1	106	127	GCUCGCUUCUCUUUCUGUCAGC	::::::.:: :::::::::	GGCGACAGAGAGUGAAGCGAGC	Translation	LOC_Os01g55750	-	-	-	-	-	Zm00001eb152350	-	TCP domain-containing protein	5.06183	0.225904	0.0387056	0.0783627	0.0710677	RNA biosynthesis	TCP	0.99947
sbi-miR156.3	Sobic.004G348800	2.5	-1	1099	1118	UGACAGAAGAGAGAGAGCAC	: .::::::::::.:::.:	UUUUUCUCUCUCUUUUGUUA	Cleavage	LOC_Os02g57490;LOC_Os02g57490;LOC_Os02g57490;LOC_Os02g57490;LOC_Os02g57490;LOC_Os02g57490;LOC_Os02g57490;LOC_Os02g57490;LOC_Os02g57490	DH1#(LOC_Os02g57490);DH1#(LOC_Os02g57490);DH1#(LOC_Os02g57490);DH1#(LOC_Os02g57490);DH1#(LOC_Os02g57490);DH1#(LOC_Os02g57490);DH1#(LOC_Os02g57490);DH1#(LOC_Os02g57490);DH1#(LOC_Os02g57490)	In this study, we screened 4416 lab-created T(1) rice T-DNA tagged lines and identified a mutant, designated dh1 (degenerated hull1), with phenotype of degenerated hull and naked pistils and stamens.#(stamen#(DH1#(LOC_Os02g57490)));The result of transformation by a fused expression vector, pDH1::GFP, revealed that DH1 had the keen spatial and temporal characteristics of expressing at axillary bud…	-	-	-	Zm00001eb191170	-	LOB domain-containing protein	0.230968	0.194965	1.92097	6.26765	2.0181	RNA biosynthesis	LBD	-0.611108
sbi-miR156.3	Sobic.008G064500	4	-1	1319	1338	UGACAGAAGAGAGAGAGCAC	:::.:.:::: .:::::::	GUGUUUUCUCAUUUCUGUCC	Translation	LOC_Os12g08790	-	-	-	-	-	-	-	-	0.0595422	0.219731	0.443124	0.137936	0.0859207	-	-	-0.272106
sbi-miR156.3	Sobic.005G072600	3.5	-1	358	377	UGACAGAAGAGAGAGAGCAC	:::: ::.:.:.::.:::.:	GUGCACUUUUUUUUUUGUUA	Cleavage	LOC_Os11g09030	-	-	-	-	-	Zm00001eb202060	-	-	0.551715	0.211797	0.331722	2.08753	0.20961	-	-	-0.196632
sbi-miR156.3	Sobic.009G183500	3.5	-1	387	405	UGACAGAAGAGAGAGAGCAC	:::::.::: ::::::::::	GUGCUUUCU-UCUUCUGUCA	Translation	LOC_Os05g41620	-	-	AT5G04000	-	hypothetical protein.	Zm00001eb291660	-	Mediator of RNA polymerase II transcription subunit 23	121.038	39.6852	35.8429	41.9529	161.871	-	-	-0.0398328
sbi-miR156.3	Sobic.005G120600	0	-1	950	969	UGACAGAAGAGAGAGAGCAC	::::::::::::::::::::	GUGCUCUCUCUCUUCUGUCA	Cleavage	LOC_Os11g30370	-	-	AT5G50570;AT5G50670	SQUAMOSA PROMOTER-BINDING PROTEIN LIKE 13A (SPL13A)#(AT5G50570);SQUAMOSA PROMOTER-BINDING PROTEIN LIKE 13B (SPL13B)#(AT5G50670)	Together with SPL13B involved in floral transition. Expression reduced by Verticillium dahliae SRNAs which affects the plant's miR157d which targets SPL13A and B.#(AT5G50570);Together with SPL13B involved in floral transition. Expression reduced by Verticillium dahliae SRNAs which affects the plant's miR157d which targets SPL13A and B.#(AT5G50670)	Zm00001eb169410	-	squamosa promoter-binding-like protein 16	5.35797	6.40009	2.40113	3.53539	5.90448	RNA biosynthesis	SBP	0.432251
sbi-miR156.3	Sobic.002G062500	3.5	-1	1995	2016	UGACAGAAGAGAGA--GAGCAC	:::::: ::::::::.::::.	GUGCUCGCUCUCUCUUUUGUCG	Cleavage	LOC_Os07g09060;LOC_Os07g09060;LOC_Os07g09060;LOC_Os07g09060;LOC_Os07g09060;LOC_Os07g09060;LOC_Os07g09060;LOC_Os07g09060;LOC_Os07g09060;LOC_Os07g09060;LOC_Os07g09060;LOC_Os07g09060;LOC_Os07g09060;LOC_Os07g09060	MMSDH#(LOC_Os07g09060);MMSDH#(LOC_Os07g09060);MMSDH#(LOC_Os07g09060);MMSDH#(LOC_Os07g09060);MMSDH#(LOC_Os07g09060);MMSDH#(LOC_Os07g09060);MMSDH#(LOC_Os07g09060);MMSDH#(LOC_Os07g09060);MMSDH#(LOC_Os07g09060);MMSDH#(LOC_Os07g09060);MMSDH#(LOC_Os07g09060);MMSDH#(LOC_Os07g09060);MMSDH#(LOC_Os07g09060);MMSDH#(LOC_Os07g09060)	MMSDH responded to auxin and gibberellin, but did not respond to brassinolide and cytokinin.#(GA#(MMSDH#(LOC_Os07g09060)));Furthermore, the amount of MMSDH in slr1, a constitutive gibberellin response mutant, was 2-fold that of wild type.#(GA#(MMSDH#(LOC_Os07g09060)));MMSDH was detected in cultured suspension cells, root and leaf sheath, but not in leaf blades.#(leaf#(MMSDH#(LOC_Os07g09060)));MMS…	AT2G14170	ALDEHYDE DEHYDROGENASE 6B2 (ALDH6B2)	Arabidopsis thaliana methylmalonate-semialdehyde dehydrogenase.	Zm00001eb302330	-	Methylmalonate-semialdehyde dehydrogenase (CoA acylating)	59.1924	61.2569	41.9369	68.7518	38.842	Amino acid metabolism;Enzyme classification	-	0.506318
sbi-miR156.3	Sobic.004G080350	2.5	-1	1820	1839	UGACAGAAGAGAGAGAGCAC	::::::::::::::: ::	UUGCUCUCUCUCUUCUCUCU	Cleavage	-	-	-	-	-	-	-	-	-	0.215214	0.227218	0.272569	0.0887515	0.0207688	-	-	0.561979
sbi-miR156.3	Sobic.009G242700	2.5	-1	669	688	UGACAGAAGAGAGAGAGCAC	:: ::::::::.::.:::.:	GUUCUCUCUCUUUUUUGUUA	Cleavage	LOC_Os05g50180	-	-	AT1G18530;AT3G25600	CALMODULIN LIKE 15 (CML15)#(AT1G18530);CALMODULIN LIKE 16 (CML16)#(AT3G25600)	Calmodulin like protein. Paralog of CML16. Expression in flowers is restricted to anthers and mature pollen.#(AT1G18530);Calmodulin like protein. Paralog of CML15.#(AT3G25600)	Zm00001eb296740	-	Putative calcium-binding protein CML14	165.354	103.002	156.382	27.422	3.83254	Multi-process regulation	-	0.658227
sbi-miR156.3	Sobic.010G277200	3.5	-1	2552	2571	UGACAGAAGAGAGAGAGCAC	:::::::::::::::.	UCUCUCUCUCUCUUCUGUUU	Cleavage	LOC_Os02g52460	-	-	AT3G02820	-	zinc knuckle (CCHC-type) family protein.	-	-	-	20.1991	10.4689	16.3214	7.21707	4.70157	-	-	0.676913
sbi-miR156.3	Sobic.003G421201	3	-1	523	542	UGACAGAAGAGAGAGAGCAC	::.:::.:. :::::::::	UUGUUCUUUUGCUUCUGUCA	Translation	LOC_Os01g71320;LOC_Os01g71320	SNG1|OsHXK3#(LOC_Os01g71320);SNG1|OsHXK3#(LOC_Os01g71320)	OsHXK3 encodes a hexokinase-like protein that positively regulates grain size in rice.#(grain size#(SNG1|OsHXK3#(LOC_Os01g71320)));Scanning electron microscopy analysis revealed that OsHXK3 affects grain size by promoting spikelet husk cell expansion.#(grain size#(SNG1|OsHXK3#(LOC_Os01g71320)))	AT1G50460;AT3G20040	HEXOKINASE-LIKE 1 (HKL1)#(AT1G50460); (ATHXK4)#(AT3G20040)	Involved in glucose-ethylene crosstalk.#(AT1G50460);Hexokinase.#(AT3G20040)	Zm00001eb141560;Zm00001eb363200	-;-	Phosphotransferase.#(Zm00001eb141560);Phosphotransferase.#(Zm00001eb363200)	27.083	64.1115	12.9048	10.5823	3.05839	Carbohydrate metabolism	-	0.704727
sbi-miR156.3	Sobic.002G428800	3	-1	3320	3339	UGACAGAAGAGAGAGAGCAC	::.:.:::.::::.::::	UUGUUUUCUUUCUUUUGUCU	Cleavage	LOC_Os07g49230	-	-	AT2G30110;AT5G06460	UBIQUITIN-ACTIVATING ENZYME 1 (UBA1)#(AT2G30110);UBIQUITIN ACTIVATING ENZYME 2 (UBA 2)#(AT5G06460)	Encodes a ubiquitin-activating enzyme (E1), involved in the first step in conjugating multiple ubiquitins to proteins targeted for degradation. Gene is expressed in most tissues examined. Mutant is able to revert the constitutive defense responses phenotype of snc1, which indicates the gene is involved in defense response. It also indicates that ubiquitination plays a role in plant defense signal…	Zm00001eb331520	-	E1 ubiquitin-activating enzyme	35.6188	44.9822	36.3357	12.9635	3.75903	Protein homeostasis	-	0.721183
sbi-miR156.3	Sobic.007G210200	0	-1	1245	1264	UGACAGAAGAGAGAGAGCAC	::::::::::::::::::::	GUGCUCUCUCUCUUCUGUCA	Cleavage	LOC_Os08g39890;LOC_Os08g39890;LOC_Os08g39890;LOC_Os08g39890;LOC_Os08g39890;LOC_Os08g39890;LOC_Os08g39890;LOC_Os08g39890;LOC_Os08g39890;LOC_Os08g39890;LOC_Os08g39890;LOC_Os08g39890;LOC_Os08g39890;LOC_Os08g39890;LOC_Os08g39890;LOC_Os08g39890;LOC_Os08g39890;LOC_Os08g39890;LOC_Os08g39890;LOC_Os08g39890;LOC_Os08g39890;LOC_Os08g39890;LOC_Os08g39890;LOC_Os08g39890;LOC_Os08g39890;LOC_Os08g39890;LOC_Os08g…	OsSPL14|IPA1|WFP#(LOC_Os08g39890);OsSPL14|IPA1|WFP#(LOC_Os08g39890);OsSPL14|IPA1|WFP#(LOC_Os08g39890);OsSPL14|IPA1|WFP#(LOC_Os08g39890);OsSPL14|IPA1|WFP#(LOC_Os08g39890);OsSPL14|IPA1|WFP#(LOC_Os08g39890);OsSPL14|IPA1|WFP#(LOC_Os08g39890);OsSPL14|IPA1|WFP#(LOC_Os08g39890);OsSPL14|IPA1|WFP#(LOC_Os08g39890);OsSPL14|IPA1|WFP#(LOC_Os08g39890);OsSPL14|IPA1|WFP#(LOC_Os08g39890);OsSPL14|IPA1|WFP#(LOC_Os0…	Two studies describe how regulatory variation at the rice gene OsSPL14 can lead to altered plant morphology and improve grain yield.#(yield#(OsSPL14|IPA1|WFP#(LOC_Os08g39890)));We demonstrate that a point mutation in OsSPL14 perturbs OsmiR156-directed regulation of OsSPL14, generating an 'ideal' rice plant with a reduced tiller number, increased lodging resistance and enhanced grain yield.#(lodgi…	AT3G57920;AT2G42200	SQUAMOSA PROMOTER BINDING PROTEIN-LIKE 15 (SPL15)#(AT3G57920);SQUAMOSA PROMOTER BINDING PROTEIN-LIKE 9 (SPL9)#(AT2G42200)	Encodes a putative transcriptional regulator that is involved in the vegetative to reproductive phase transition. Expression is regulated by MIR156b.#(AT3G57920);Encodes a putative transcriptional regulator that is involved in the vegetative to reproductive phase transition. Expression is regulated by MIR156b. SPL activity nonautonomously inhibits initiation of new leaves at the shoot apical meri…	Zm00001eb035030	-	Squamosa promoter-binding-like protein 17	15.3145	38.4526	1.59527	1.0895	0.702934	RNA biosynthesis	SBP	0.724912
sbi-miR156.3	Sobic.004G058900	0	-1	966	985	UGACAGAAGAGAGAGAGCAC	::::::::::::::::::::	GUGCUCUCUCUCUUCUGUCA	Cleavage	LOC_Os06g45310	-	-	-	-	-	Zm00001eb233320	-	Squamosa promoter-binding-like protein 12	22.5702	17.7974	19.8398	12.0484	3.10543	RNA biosynthesis	SBP	0.743136
sbi-miR156.3	Sobic.004G086000	2.5	-1	527	546	UGACAGAAGAGAGAGAGCAC	: .:::.:::::::::::.	CUUUUCUUUCUCUUCUGUCG	Cleavage	LOC_Os02g10920;LOC_Os02g10920;LOC_Os02g10920;LOC_Os02g10920;LOC_Os02g10920;LOC_Os02g10920;LOC_Os02g10920;LOC_Os02g10920;LOC_Os02g10920	SRZ1#(LOC_Os02g10920);SRZ1#(LOC_Os02g10920);SRZ1#(LOC_Os02g10920);SRZ1#(LOC_Os02g10920);SRZ1#(LOC_Os02g10920);SRZ1#(LOC_Os02g10920);SRZ1#(LOC_Os02g10920);SRZ1#(LOC_Os02g10920);SRZ1#(LOC_Os02g10920)	SRZ1 was expressed with high level in leaves and markedly repressed by salt, cold, drought and abcisic acid stresses but not by salicylic acid and blast inoculation in rice seedlings.#(drought#(SRZ1#(LOC_Os02g10920)));SRZ1 was expressed with high level in leaves and markedly repressed by salt, cold, drought and abcisic acid stresses but not by salicylic acid and blast inoculation in rice seedling…	AT5G25490;AT3G15680	JULGI2 (JUL2)#(AT5G25490);JULGI1 (JUL1)#(AT3G15680)	Encodes an RNA-binding protein having three Ranbp2-type zinc fingers, involved in negative regulation of phloem development via translational suppression of SMXL4/5.#(AT5G25490);Encodes an RNA-binding protein having three Ranbp2-type zinc fingers involved in negative regulation of phloem development via translational suppression of SMXL4/5.#(AT3G15680)	Zm00001eb205550	-	transcription initiation factor TFIID subunit 15-like	520.927	57.5415	29.7783	47.3926	24.6809	-	-	0.792277
sbi-miR156.3	Sobic.007G193500	0	-1	1812	1831	UGACAGAAGAGAGAGAGCAC	::::::::::::::::::::	GUGCUCUCUCUCUUCUGUCA	Cleavage	LOC_Os08g41940;LOC_Os08g41940;LOC_Os08g41940;LOC_Os08g41940;LOC_Os08g41940;LOC_Os08g41940;LOC_Os08g41940;LOC_Os08g41940;LOC_Os08g41940;LOC_Os08g41940;LOC_Os08g41940;LOC_Os08g41940;LOC_Os08g41940;LOC_Os08g41940;LOC_Os08g41940	qGW8|OsSPL16|GW8#(LOC_Os08g41940);qGW8|OsSPL16|GW8#(LOC_Os08g41940);qGW8|OsSPL16|GW8#(LOC_Os08g41940);qGW8|OsSPL16|GW8#(LOC_Os08g41940);qGW8|OsSPL16|GW8#(LOC_Os08g41940);qGW8|OsSPL16|GW8#(LOC_Os08g41940);qGW8|OsSPL16|GW8#(LOC_Os08g41940);qGW8|OsSPL16|GW8#(LOC_Os08g41940);qGW8|OsSPL16|GW8#(LOC_Os08g41940);qGW8|OsSPL16|GW8#(LOC_Os08g41940);qGW8|OsSPL16|GW8#(LOC_Os08g41940);qGW8|OsSPL16|GW8#(LOC_Os0…	We also show that a marker-assisted strategy targeted at elite alleles of GS3 and OsSPL16 underlying grain size and shape can be effectively used to simultaneously improve grain quality and yield.#(grain quality#(qGW8|OsSPL16|GW8#(LOC_Os08g41940)));We also show that a marker-assisted strategy targeted at elite alleles of GS3 and OsSPL16 underlying grain size and shape can be effectively used to s…	-	-	-	Zm00001eb175190;Zm00001eb175150	-;TGA1#(Zm00001eb175150)	Teosinte glume architecture 1.#(Zm00001eb175190);Teosinte glume architecture 1 (Fragment).#(Zm00001eb175150)	4.30678	6.89377	1.10258	0.23699	0	RNA biosynthesis	SBP	0.854136
sbi-miR156.3	Sobic.002G312200	0	-1	665	684	UGACAGAAGAGAGAGAGCAC	:::::::::::::::::::	AUGCUCUCUCUCUUCUGUCA	Cleavage	-	-	-	-	-	-	Zm00001eb105640	-	Squamosa promoter-binding-like protein 13	21.5876	34.9386	1.73293	0.381016	0	RNA biosynthesis	SBP	0.855926
sbi-miR156.3	Sobic.006G171000	0	-1	1018	1037	UGACAGAAGAGAGAGAGCAC	::::::::::::::::::::	GUGCUCUCUCUCUUCUGUCA	Cleavage	LOC_Os04g46580;LOC_Os04g46580;LOC_Os04g46580;LOC_Os04g46580;LOC_Os04g46580;LOC_Os04g46580;LOC_Os04g46580;LOC_Os04g46580;LOC_Os04g46580;LOC_Os04g46580;LOC_Os04g46580;LOC_Os04g46580;LOC_Os04g46580;LOC_Os04g46580;LOC_Os04g46580;LOC_Os04g46580;LOC_Os04g46580;LOC_Os04g46580;LOC_Os04g46580;LOC_Os04g46580;LOC_Os04g46580	OsSPL7#(LOC_Os04g46580);OsSPL7#(LOC_Os04g46580);OsSPL7#(LOC_Os04g46580);OsSPL7#(LOC_Os04g46580);OsSPL7#(LOC_Os04g46580);OsSPL7#(LOC_Os04g46580);OsSPL7#(LOC_Os04g46580);OsSPL7#(LOC_Os04g46580);OsSPL7#(LOC_Os04g46580);OsSPL7#(LOC_Os04g46580);OsSPL7#(LOC_Os04g46580);OsSPL7#(LOC_Os04g46580);OsSPL7#(LOC_Os04g46580);OsSPL7#(LOC_Os04g46580);OsSPL7#(LOC_Os04g46580);OsSPL7#(LOC_Os04g46580);OsSPL7#(LOC_Os0…	Plants over-expressing OsSPL7 had a reduced tiller number, while OsSPL7 RNAi plants had an increased tiller number and a reduced height.#(tiller#(OsSPL7#(LOC_Os04g46580)));Genetic analysis showed that OsSPL7 is a target of miR156f that regulates plant architecture.#(architecture#(OsSPL7#(LOC_Os04g46580)));Plants over-expressing OsSPL7 had a reduced tiller number, while OsSPL7 RNAi plants had an i…	-	-	-	Zm00001eb429720	-	SBP transcription factor (Fragment)	0.0935035	0.139901	0.00801894	0	0	RNA biosynthesis	SBP	0.876932
sbi-miR156.3	Sobic.003G099232	4	-1	899	919	UGACAGA-AGAGAGAGAGCAC	: ::::::::::: :::::::	GCGCUCUCUCUCUCUCUGUCA	Cleavage	-	-	-	-	-	-	-	-	-	2.18207	2.84936	0	0.0175527	0.300011	-	-	0.888418
sbi-miR156.3	Sobic.010G169900	3	-1	689	708	UGACAGAAGAGAGAGAGCAC	:::::::::: :::.::::	GUGCUCUCUCCCUUUUGUCU	Translation	LOC_Os06g36770	-	-	AT1G51690;AT1G17720	-; (ATB BETA)#(AT1G17720)	55 kDa B regulatory subunit of phosphatase 2A mRNA,.#(AT1G51690);type 2A protein serine/threonine phosphatase 55 kDa B.#(AT1G17720)	Zm00001eb384150	-	Serine/threonine-protein phosphatase 2A 55 kDa regulatory subunit B	25.8705	29.8033	15.6114	10.621	5.78448	Protein modification	-	0.912939
sbi-miR156.3	Sobic.004G036900	0	-1	1506	1525	UGACAGAAGAGAGAGAGCAC	::::::::::::::::::::	GUGCUCUCUCUCUUCUGUCA	Cleavage	LOC_Os02g04680;LOC_Os02g04680;LOC_Os02g04680	OsSPL3#(LOC_Os02g04680);OsSPL3#(LOC_Os02g04680);OsSPL3#(LOC_Os02g04680)	Map-based cloning revealed that lcrn1 is caused by a mutation of a putative transcription factor coding gene OsSPL3 (SQUAMOSA PROMOTER-BINDING PROTEIN-LIKE3).#(transcription factor#(OsSPL3#(LOC_Os02g04680)));Chromatin immunoprecipitation sequencing assays of OsSPL3-binding sites and RNA-sequencing of differentially expressed transcripts in lcrn1 further identified potential direct targets of OsSP…	AT1G27370;AT5G43270	SQUAMOSA PROMOTER BINDING PROTEIN-LIKE 10 (SPL10)#(AT1G27370);SQUAMOSA PROMOTER BINDING PROTEIN-LIKE 2 (SPL2)#(AT5G43270)	In conjunction with SPL11 and SPL2, SPL10 redundantly controls proper development of lateral organs in association with shoot maturation in the reproductive phase. SPL2, SPL10, and SPL11, suppress root regeneration with age by inhibiting wound-induced auxin biosynthesis. SPL10 also controls lamina shape during vegetative development.#(AT1G27370);Member of the SPL (squamosa-promoter binding protei…	Zm00001eb232050	SPL3	Squamosa promoter-binding-like protein 2	16.4841	18.6018	8.78953	3.73966	1.18234	RNA biosynthesis	SBP	0.916265
sbi-miR156.3	Sobic.003G406600	0	-1	2174	2193	UGACAGAAGAGAGAGAGCAC	::::::::::::::::::::	GUGCUCUCUCUCUUCUGUCA	Cleavage	LOC_Os01g69830;LOC_Os01g69830	OsSPL2#(LOC_Os01g69830);OsSPL2#(LOC_Os01g69830)	The results suggested that H(2) O(2) accumulation in rice suppresses the expression of miR156, and induces the expression of its target genes, OsSPL2 and OsTIFY11b, whose proteins interact in the nucleus to regulate the expression of OsRBBI3-3, which is involved in plant defense.#(defense#(OsSPL2#(LOC_Os01g69830))); The results suggested that H(2) O(2) accumulation in rice suppresses the expressi…	-	-	-	Zm00001eb143110	-	SBP-type domain-containing protein	25.3103	32.1427	3.19254	1.01094	0.210485	RNA biosynthesis	SBP	0.919677
sbi-miR156.3	Sobic.004G038800	3.5	-1	2156	2174	UGACAGAAGAGAGAGAGCAC	:::.:::::::::: :::::	GUGUUCUCUCUCUU-UGUCA	Cleavage	LOC_Os06g07450;LOC_Os06g07460;LOC_Os06g07380;LOC_Os06g07390	-;-;-;-	-;-;-;-	AT1G30925;AT2G02660;AT2G23160;AT2G16220;AT2G16450;AT5G52620;AT1G46912;AT1G47340;AT2G15640;AT2G02890;AT1G47350;AT3G04660	-;-;-;ARSENIC STRESS-RELATED F-BOX (ASRF)#(AT2G16220);-;-;-;-;-;-;-;-	F-box/associated interaction domain protein.#(AT1G30925);F-box associated ubiquitination effector family protein.#(AT2G02660);F-box family protein.#(AT2G23160);Stress induced gene. Mutants show increased sensitivity to arsenate.#(AT2G16220);F-box and associated interaction domains-containing protein.#(AT2G16450);F-box associated ubiquitination effector family protein.#(AT5G52620);F-box associated…	-	-	-	28.0634	16.2414	12.6143	10.9922	5.00615	-	-	0.937289
sbi-miR156.3	Sobic.001G502000	3	-1	1764	1783	UGACAGAAGAGAGAGAGCAC	::::.:.:. :::::::::	AUGCUUUUUUGCUUCUGUCA	Translation	-	-	-	-	-	-	Zm00001eb004100	-	H( )/Pi cotransporter	0.145989	0.157785	0	0.0124252	0	Nutrient uptake;Solute transport	-	0.952129
sbi-miR156.3	Sobic.003G096600	2.5	-1	1682	1701	UGACAGAAGAGAGAGAGCAC	::::::.:.:.:::::::	CUGCUCUUUUUUUUCUGUCU	Cleavage	-	-	-	-	-	-	-	-	-	1.55179	0.874827	0.409976	0	0	-	-	0.959716
sbi-miR156.3	Sobic.002G257900	0	-1	1122	1141	UGACAGAAGAGAGAGAGCAC	::::::::::::::::::::	GUGCUCUCUCUCUUCUGUCA	Cleavage	LOC_Os09g32944;LOC_Os09g32944;LOC_Os09g32944;LOC_Os09g32944;LOC_Os09g32944;LOC_Os09g32944;LOC_Os09g32944;LOC_Os09g32944;LOC_Os09g32944;LOC_Os09g32944;LOC_Os09g32944;LOC_Os09g32944;LOC_Os09g32944;LOC_Os09g32944;LOC_Os09g32944;LOC_Os09g32944;LOC_Os09g32944;LOC_Os09g32944;LOC_Os09g32944;LOC_Os09g32944;LOC_Os09g32944;LOC_Os09g32944;LOC_Os09g32944;LOC_Os09g32944	OsSPL18#(LOC_Os09g32944);OsSPL18#(LOC_Os09g32944);OsSPL18#(LOC_Os09g32944);OsSPL18#(LOC_Os09g32944);OsSPL18#(LOC_Os09g32944);OsSPL18#(LOC_Os09g32944);OsSPL18#(LOC_Os09g32944);OsSPL18#(LOC_Os09g32944);OsSPL18#(LOC_Os09g32944);OsSPL18#(LOC_Os09g32944);OsSPL18#(LOC_Os09g32944);OsSPL18#(LOC_Os09g32944);OsSPL18#(LOC_Os09g32944);OsSPL18#(LOC_Os09g32944);OsSPL18#(LOC_Os09g32944);OsSPL18#(LOC_Os09g32944)…	Transcriptional activation experiments indicated that OsSPL18 is a functional transcription factor with activation domains in both the N-terminus and C-terminus, and both activation domains are indispensable for its biological functions.#(transcription factor#(OsSPL18#(LOC_Os09g32944)));In this study, we studied the biological function of OsSPL18 during grain and panicle development in rice.#(pan…	AT5G50570;AT5G50670	SQUAMOSA PROMOTER-BINDING PROTEIN LIKE 13A (SPL13A)#(AT5G50570);SQUAMOSA PROMOTER-BINDING PROTEIN LIKE 13B (SPL13B)#(AT5G50670)	Together with SPL13B involved in floral transition. Expression reduced by Verticillium dahliae SRNAs which affects the plant's miR157d which targets SPL13A and B.#(AT5G50570);Together with SPL13B involved in floral transition. Expression reduced by Verticillium dahliae SRNAs which affects the plant's miR157d which targets SPL13A and B.#(AT5G50670)	Zm00001eb102440	TGA1	Teosinte glume architecture 1	2.81358	2.5418	1.25839	1.22839	0.231261	RNA biosynthesis	SBP	0.967861
sbi-miR156.3	Sobic.006G049900	3.5	-1	651	670	UGACAGAAGAGAGAGAGCAC	:::::.:.:.::::::: .:	GUGCUUUUUUUCUUCUGAUA	Cleavage	-	-	-	AT3G11450;AT5G06110	GONIDIALESS A/ZUOTIN RELATED FACTOR A1 (ATGLSA1)#(AT3G11450);GONIDIALESS A/ZUOTIN RELATED FACTOR A2 (ATGLSA2)#(AT5G06110)	Encodes a ZRF1 chromatin regulator. Functions in regulating plant growth and development.#(AT3G11450);Encodes a ZRF1 chromatin regulator. Functions in regulating plant growth and development.#(AT5G06110)	Zm00001eb085940;Zm00001eb085870	-;-	dnaJ homolog subfamily C member 2-like.#(Zm00001eb085940);dnaJ homolog subfamily C member 2-like.#(Zm00001eb085870)	11.9891	11.897	6.18632	5.49136	2.95917	Protein homeostasis	MYB_related	0.96929
sbi-miR156.3	Sobic.003G093900	3	-1	74	93	UGACAGAAGAGAGAGAGCAC	:: . ::.::::::::::::	GUUUACUUUCUCUUCUGUCA	Cleavage	-	-	-	-	-	-	Zm00001eb334820	-	sarcoplasmic reticulum histidine-rich calcium-binding protein	96.3726	89.3887	47.0203	31.5087	29.9821	-	-	0.972349
sbi-miR156.3	Sobic.002G247800	0	-1	1325	1344	UGACAGAAGAGAGAGAGCAC	::::::::::::::::::::	GUGCUCUCUCUCUUCUGUCA	Cleavage	LOC_Os09g31438;LOC_Os09g31438	OsSPL17#(LOC_Os09g31438);OsSPL17#(LOC_Os09g31438)	The uncovered miR156/529-OsSPL7/14/17-OsAOS2/OsNPR1 regulatory network provides a potential strategy to genetically improve rice disease resistance.#(disease#(OsSPL17#(LOC_Os09g31438)));The uncovered miR156/529-OsSPL7/14/17-OsAOS2/OsNPR1 regulatory network provides a potential strategy to genetically improve rice disease resistance.#(disease resistance#(OsSPL17#(LOC_Os09g31438)))	AT3G57920;AT2G42200	SQUAMOSA PROMOTER BINDING PROTEIN-LIKE 15 (SPL15)#(AT3G57920);SQUAMOSA PROMOTER BINDING PROTEIN-LIKE 9 (SPL9)#(AT2G42200)	Encodes a putative transcriptional regulator that is involved in the vegetative to reproductive phase transition. Expression is regulated by MIR156b.#(AT3G57920);Encodes a putative transcriptional regulator that is involved in the vegetative to reproductive phase transition. Expression is regulated by MIR156b. SPL activity nonautonomously inhibits initiation of new leaves at the shoot apical meri…	Zm00001eb316740	-	Squamosa promoter-binding-like protein 17	8.46788	7.22986	2.52576	0.505369	0.141671	RNA biosynthesis	SBP	0.975461
sbi-miR156.3	Sobic.002G312300	0	-1	1009	1028	UGACAGAAGAGAGAGAGCAC	:::::::::::::::::::	AUGCUCUCUCUCUUCUGUCA	Cleavage	-	-	-	-	-	-	Zm00001eb322280	-	SBP-box transcription factor	53.916	48.6579	4.84009	0.42303	0	RNA biosynthesis	SBP	0.97704
sbi-miR156.3	Sobic.003G432800	3.5	-1	1830	1849	UGACAGAAGAGAGAGAGCAC	:::::::::: .: ::::::	GUGCUCUCUCCUUGCUGUCA	Translation	LOC_Os01g72820	-	-	AT2G28480	-	RNA-binding CRS1 / YhbY (CRM) domain protein.	Zm00001eb140480	-	CRM domain-containing protein	27.4733	22.9945	12.9038	10.0859	4.28603	RNA processing	-	0.982832
sbi-miR156.3	Sobic.004G050600	2	-1	143	162	UGACAGAAGAGAGAGAGCAC	: :::::.::::::.:::::	GAGCUCUUUCUCUUUUGUCA	Cleavage	LOC_Os02g06660	-	-	AT4G04900;AT4G21745	ROP-INTERACTIVE CRIB MOTIF-CONTAINING PROTEIN 10 (RIC10)#(AT4G04900);-	encodes a member of a novel protein family that contains contain a CRIB (for Cdc42/Rac-interactive binding) motif required for their specific interaction with GTP-bound Rop1 (plant-specific Rho GTPase). Most similar to RIC9 and RIC11 (subfamily group I). Gene is expressed predominantly in roots, leaves, and seedlings.#(AT4G04900);PAK-box/P21-Rho-binding family protein.#(AT4G21745)	Zm00001eb232750	-	CRIB domain-containing protein	0.0864617	0.0560184	0	0	0	-	-	0.983382
sbi-miR156.3	Sobic.010G254200	0	-1	1513	1532	UGACAGAAGAGAGAGAGCAC	::::::::::::::::::::	GUGCUCUCUCUCUUCUGUCA	Cleavage	LOC_Os06g49010	-	-	AT1G27370;AT5G43270	SQUAMOSA PROMOTER BINDING PROTEIN-LIKE 10 (SPL10)#(AT1G27370);SQUAMOSA PROMOTER BINDING PROTEIN-LIKE 2 (SPL2)#(AT5G43270)	In conjunction with SPL11 and SPL2, SPL10 redundantly controls proper development of lateral organs in association with shoot maturation in the reproductive phase. SPL2, SPL10, and SPL11, suppress root regeneration with age by inhibiting wound-induced auxin biosynthesis. SPL10 also controls lamina shape during vegetative development.#(AT1G27370);Member of the SPL (squamosa-promoter binding protei…	Zm00001eb227180	LOC100283160	Squamosa-promoter binding protein-like protein	15.9628	14.1628	2.75045	1.01561	0.076433	RNA biosynthesis	SBP	0.983723
sbi-miR156.3	Sobic.004G039700	3.5	-1	2189	2207	UGACAGAAGAGAGAGAGCAC	:::.:::::::::: :::::	GUGUUCUCUCUCUU-UGUCA	Cleavage	LOC_Os06g07450;LOC_Os06g07460;LOC_Os06g07380;LOC_Os06g07390	-;-;-;-	-;-;-;-	AT1G30925;AT2G02660;AT2G23160;AT2G16220;AT2G16450;AT5G52620;AT1G46912;AT1G47340;AT2G15640;AT2G02890;AT1G47350;AT3G04660	-;-;-;ARSENIC STRESS-RELATED F-BOX (ASRF)#(AT2G16220);-;-;-;-;-;-;-;-	F-box/associated interaction domain protein.#(AT1G30925);F-box associated ubiquitination effector family protein.#(AT2G02660);F-box family protein.#(AT2G23160);Stress induced gene. Mutants show increased sensitivity to arsenate.#(AT2G16220);F-box and associated interaction domains-containing protein.#(AT2G16450);F-box associated ubiquitination effector family protein.#(AT5G52620);F-box associated…	-	-	-	34.6306	25.671	12.2143	10.1913	4.0378	-	-	0.995079
sbi-miR156.4	Sobic.009G013900	3	-1	112	131	UGACAGAAGAGAGCGAGCAC	:::::::::: :::::.:	CCGCUCGCUCUCCUCUGUUA	Cleavage	LOC_Os05g02130;LOC_Os05g02130;LOC_Os05g02130	Xb3#(LOC_Os05g02130);Xb3#(LOC_Os05g02130);Xb3#(LOC_Os05g02130)	Rice XA21 binding protein 3 is a ubiquitin ligase required for full Xa21-mediated disease resistance.#(disease resistance#(Xb3#(LOC_Os05g02130)));Rice XA21 binding protein 3 is a ubiquitin ligase required for full Xa21-mediated disease resistance.#(resistance#(Xb3#(LOC_Os05g02130)));These results indicate that Xb3 is necessary for full accumulation of the XA21 protein and for Xa21-mediated resist…	AT2G28840	XB3 ORTHOLOG 1 IN ARABIDOPSIS THALIANA (XBAT31)	Putative E3 Ub protein ligase; regulates thermoresponsive hypocotyl growth through mediating degradation of the thermosensor ELF3.	Zm00001eb355740	-	E3 ubiquitin-protein ligase XB3	70.6675	54.5439	91.4784	41.5466	37.849	Protein homeostasis	-	-0.439033
sbi-miR156.4	Sobic.010G140600	3	-1	153	172	UGACAGAAGAGAGCGAGCAC	::::::. ::::::::::	CUGCUCGUCCUCUUCUGUCU	Cleavage	LOC_Os06g28970	-	-	AT5G17560	HOMOLOG OF E.COLI BOLA 4 (BOLA4)	BolA-like family protein.	Zm00001eb278180	-	protein BOLA4	31.8419	24.8398	12.5207	6.92386	7.10659	Coenzyme metabolism	-	-0.417902
sbi-miR156.4	Sobic.002G247800	1	-1	1325	1344	UGACAGAAGAGAGCGAGCAC	:::::: :::::::::::::	GUGCUCUCUCUCUUCUGUCA	Cleavage	LOC_Os09g31438;LOC_Os09g31438	OsSPL17#(LOC_Os09g31438);OsSPL17#(LOC_Os09g31438)	The uncovered miR156/529-OsSPL7/14/17-OsAOS2/OsNPR1 regulatory network provides a potential strategy to genetically improve rice disease resistance.#(disease#(OsSPL17#(LOC_Os09g31438)));The uncovered miR156/529-OsSPL7/14/17-OsAOS2/OsNPR1 regulatory network provides a potential strategy to genetically improve rice disease resistance.#(disease resistance#(OsSPL17#(LOC_Os09g31438)))	AT3G57920;AT2G42200	SQUAMOSA PROMOTER BINDING PROTEIN-LIKE 15 (SPL15)#(AT3G57920);SQUAMOSA PROMOTER BINDING PROTEIN-LIKE 9 (SPL9)#(AT2G42200)	Encodes a putative transcriptional regulator that is involved in the vegetative to reproductive phase transition. Expression is regulated by MIR156b.#(AT3G57920);Encodes a putative transcriptional regulator that is involved in the vegetative to reproductive phase transition. Expression is regulated by MIR156b. SPL activity nonautonomously inhibits initiation of new leaves at the shoot apical meri…	Zm00001eb316740	-	Squamosa promoter-binding-like protein 17	8.46788	7.22986	2.52576	0.505369	0.141671	RNA biosynthesis	SBP	-0.378524
sbi-miR156.4	Sobic.004G032100	3	-1	818	837	UGACAGAAGAGAGCGAGCAC	::: .:::.::::::::::	GUGAAUGCUUUCUUCUGUCA	Cleavage	LOC_Os02g04110	-	-	-	-	-	Zm00001eb231500	-	Transmembrane protein 53	12.9948	15.1814	4.04566	1.06321	2.14202	-	-	-0.37641
sbi-miR156.4	Sobic.004G050600	3	-1	143	162	UGACAGAAGAGAGCGAGCAC	: :::: .::::::.:::::	GAGCUCUUUCUCUUUUGUCA	Cleavage	LOC_Os02g06660	-	-	AT4G04900;AT4G21745	ROP-INTERACTIVE CRIB MOTIF-CONTAINING PROTEIN 10 (RIC10)#(AT4G04900);-	encodes a member of a novel protein family that contains contain a CRIB (for Cdc42/Rac-interactive binding) motif required for their specific interaction with GTP-bound Rop1 (plant-specific Rho GTPase). Most similar to RIC9 and RIC11 (subfamily group I). Gene is expressed predominantly in roots, leaves, and seedlings.#(AT4G04900);PAK-box/P21-Rho-binding family protein.#(AT4G21745)	Zm00001eb232750	-	CRIB domain-containing protein	0.0864617	0.0560184	0	0	0	-	-	-0.343163
sbi-miR156.4	Sobic.002G312300	1	-1	1009	1028	UGACAGAAGAGAGCGAGCAC	::::: :::::::::::::	AUGCUCUCUCUCUUCUGUCA	Cleavage	-	-	-	-	-	-	Zm00001eb322280	-	SBP-box transcription factor	53.916	48.6579	4.84009	0.42303	0	RNA biosynthesis	SBP	-0.33369
sbi-miR156.4	Sobic.007G001500	3	-1	1664	1683	UGACAGAAGAGAGCGAGCAC	:: :::.::::::::::.	CUGAUCGUUCUCUUCUGUUU	Cleavage	LOC_Os08g01180	-	-	AT3G44330	-	M28 Zn-peptidase nicastrin.	Zm00001eb198750	-	Nicalin	41.1728	48.9732	21.1918	12.5863	12.357	-	-	-0.333112
sbi-miR156.4	Sobic.010G254200	1	-1	1513	1532	UGACAGAAGAGAGCGAGCAC	:::::: :::::::::::::	GUGCUCUCUCUCUUCUGUCA	Cleavage	LOC_Os06g49010	-	-	AT1G27370;AT5G43270	SQUAMOSA PROMOTER BINDING PROTEIN-LIKE 10 (SPL10)#(AT1G27370);SQUAMOSA PROMOTER BINDING PROTEIN-LIKE 2 (SPL2)#(AT5G43270)	In conjunction with SPL11 and SPL2, SPL10 redundantly controls proper development of lateral organs in association with shoot maturation in the reproductive phase. SPL2, SPL10, and SPL11, suppress root regeneration with age by inhibiting wound-induced auxin biosynthesis. SPL10 also controls lamina shape during vegetative development.#(AT1G27370);Member of the SPL (squamosa-promoter binding protei…	Zm00001eb227180	LOC100283160	Squamosa-promoter binding protein-like protein	15.9628	14.1628	2.75045	1.01561	0.076433	RNA biosynthesis	SBP	-0.323151
sbi-miR156.4	Sobic.005G120600	1	-1	950	969	UGACAGAAGAGAGCGAGCAC	:::::: :::::::::::::	GUGCUCUCUCUCUUCUGUCA	Cleavage	LOC_Os11g30370	-	-	AT5G50570;AT5G50670	SQUAMOSA PROMOTER-BINDING PROTEIN LIKE 13A (SPL13A)#(AT5G50570);SQUAMOSA PROMOTER-BINDING PROTEIN LIKE 13B (SPL13B)#(AT5G50670)	Together with SPL13B involved in floral transition. Expression reduced by Verticillium dahliae SRNAs which affects the plant's miR157d which targets SPL13A and B.#(AT5G50570);Together with SPL13B involved in floral transition. Expression reduced by Verticillium dahliae SRNAs which affects the plant's miR157d which targets SPL13A and B.#(AT5G50670)	Zm00001eb169410	-	squamosa promoter-binding-like protein 16	5.35797	6.40009	2.40113	3.53539	5.90448	RNA biosynthesis	SBP	-0.323012
sbi-miR156.4	Sobic.004G342300	3.5	-1	2006	2025	UGACAGAAGAGAGCGAGCAC	:: ::.:::::.::.::::	GUUCUUGCUCUUUUUUGUCU	Cleavage	LOC_Os02g56950	-	-	AT5G44010	-	fanconi anemia group F protein (FANCF).	Zm00001eb191560	-	-	14.5866	17.0429	5.94765	2.40839	1.24121	-	-	-0.30765
sbi-miR156.4	Sobic.003G043800	4	-1	1520	1540	UGACA-GAAGAGAGCGAGCAC	::.:.::::::::: :::::	CUGUUUGCUCUCUUCAUGUCA	Cleavage	LOC_Os01g14100	-	-	AT5G54860	-	Major facilitator superfamily protein.	Zm00001eb122330	-	Major facilitator superfamily protein (Fragment)	18.921	18.962	6.13418	5.05371	4.56185	Solute transport	-	-0.305517
sbi-miR156.4	Sobic.004G036900	1	-1	1506	1525	UGACAGAAGAGAGCGAGCAC	:::::: :::::::::::::	GUGCUCUCUCUCUUCUGUCA	Cleavage	LOC_Os02g04680;LOC_Os02g04680;LOC_Os02g04680	OsSPL3#(LOC_Os02g04680);OsSPL3#(LOC_Os02g04680);OsSPL3#(LOC_Os02g04680)	Map-based cloning revealed that lcrn1 is caused by a mutation of a putative transcription factor coding gene OsSPL3 (SQUAMOSA PROMOTER-BINDING PROTEIN-LIKE3).#(transcription factor#(OsSPL3#(LOC_Os02g04680)));Chromatin immunoprecipitation sequencing assays of OsSPL3-binding sites and RNA-sequencing of differentially expressed transcripts in lcrn1 further identified potential direct targets of OsSP…	AT1G27370;AT5G43270	SQUAMOSA PROMOTER BINDING PROTEIN-LIKE 10 (SPL10)#(AT1G27370);SQUAMOSA PROMOTER BINDING PROTEIN-LIKE 2 (SPL2)#(AT5G43270)	In conjunction with SPL11 and SPL2, SPL10 redundantly controls proper development of lateral organs in association with shoot maturation in the reproductive phase. SPL2, SPL10, and SPL11, suppress root regeneration with age by inhibiting wound-induced auxin biosynthesis. SPL10 also controls lamina shape during vegetative development.#(AT1G27370);Member of the SPL (squamosa-promoter binding protei…	Zm00001eb232050	SPL3	Squamosa promoter-binding-like protein 2	16.4841	18.6018	8.78953	3.73966	1.18234	RNA biosynthesis	SBP	-0.29415
sbi-miR156.4	Sobic.003G406600	1	-1	2174	2193	UGACAGAAGAGAGCGAGCAC	:::::: :::::::::::::	GUGCUCUCUCUCUUCUGUCA	Cleavage	LOC_Os01g69830;LOC_Os01g69830	OsSPL2#(LOC_Os01g69830);OsSPL2#(LOC_Os01g69830)	The results suggested that H(2) O(2) accumulation in rice suppresses the expression of miR156, and induces the expression of its target genes, OsSPL2 and OsTIFY11b, whose proteins interact in the nucleus to regulate the expression of OsRBBI3-3, which is involved in plant defense.#(defense#(OsSPL2#(LOC_Os01g69830))); The results suggested that H(2) O(2) accumulation in rice suppresses the expressi…	-	-	-	Zm00001eb143110	-	SBP-type domain-containing protein	25.3103	32.1427	3.19254	1.01094	0.210485	RNA biosynthesis	SBP	-0.270596
sbi-miR156.4	Sobic.010G231900	3.5	-1	1184	1203	UGACAGAAGAGAGCGAGCAC	:::.:::.:.::::.:: ::	GUGUUCGUUUUCUUUUGCCA	Cleavage	-	-	-	-	-	-	-	-	-	3.26625	3.33622	15.4235	16.859	108.221	-	-	-0.269734
sbi-miR156.4	Sobic.006G171000	1	-1	1018	1037	UGACAGAAGAGAGCGAGCAC	:::::: :::::::::::::	GUGCUCUCUCUCUUCUGUCA	Cleavage	LOC_Os04g46580;LOC_Os04g46580;LOC_Os04g46580;LOC_Os04g46580;LOC_Os04g46580;LOC_Os04g46580;LOC_Os04g46580;LOC_Os04g46580;LOC_Os04g46580;LOC_Os04g46580;LOC_Os04g46580;LOC_Os04g46580;LOC_Os04g46580;LOC_Os04g46580;LOC_Os04g46580;LOC_Os04g46580;LOC_Os04g46580;LOC_Os04g46580;LOC_Os04g46580;LOC_Os04g46580;LOC_Os04g46580	OsSPL7#(LOC_Os04g46580);OsSPL7#(LOC_Os04g46580);OsSPL7#(LOC_Os04g46580);OsSPL7#(LOC_Os04g46580);OsSPL7#(LOC_Os04g46580);OsSPL7#(LOC_Os04g46580);OsSPL7#(LOC_Os04g46580);OsSPL7#(LOC_Os04g46580);OsSPL7#(LOC_Os04g46580);OsSPL7#(LOC_Os04g46580);OsSPL7#(LOC_Os04g46580);OsSPL7#(LOC_Os04g46580);OsSPL7#(LOC_Os04g46580);OsSPL7#(LOC_Os04g46580);OsSPL7#(LOC_Os04g46580);OsSPL7#(LOC_Os04g46580);OsSPL7#(LOC_Os0…	Plants over-expressing OsSPL7 had a reduced tiller number, while OsSPL7 RNAi plants had an increased tiller number and a reduced height.#(tiller#(OsSPL7#(LOC_Os04g46580)));Genetic analysis showed that OsSPL7 is a target of miR156f that regulates plant architecture.#(architecture#(OsSPL7#(LOC_Os04g46580)));Plants over-expressing OsSPL7 had a reduced tiller number, while OsSPL7 RNAi plants had an i…	-	-	-	Zm00001eb429720	-	SBP transcription factor (Fragment)	0.0935035	0.139901	0.00801894	0	0	RNA biosynthesis	SBP	-0.252575
sbi-miR156.4	Sobic.010G032900	3	-1	2188	2207	UGACAGAAGAGAGCGAGCAC	:::::: ::::::.::::	UUGCUCGAUCUCUUUUGUCU	Cleavage	LOC_Os06g05100	-	-	AT5G11380	1-DEOXY-D-XYLULOSE 5-PHOSPHATE SYNTHASE 3 (DXPS3)	Encodes a protein postulated to have 1-deoxy-D-xylulose 5-phosphate synthase activity.	Zm00001eb377300	-	1-deoxy-D-xylulose-5-phosphate synthase	50.5344	52.0655	13.3465	9.70464	2.66995	Enzyme classification;Secondary metabolism	-	-0.250636
sbi-miR156.4	Sobic.007G193500	1	-1	1812	1831	UGACAGAAGAGAGCGAGCAC	:::::: :::::::::::::	GUGCUCUCUCUCUUCUGUCA	Cleavage	LOC_Os08g41940;LOC_Os08g41940;LOC_Os08g41940;LOC_Os08g41940;LOC_Os08g41940;LOC_Os08g41940;LOC_Os08g41940;LOC_Os08g41940;LOC_Os08g41940;LOC_Os08g41940;LOC_Os08g41940;LOC_Os08g41940;LOC_Os08g41940;LOC_Os08g41940;LOC_Os08g41940	qGW8|OsSPL16|GW8#(LOC_Os08g41940);qGW8|OsSPL16|GW8#(LOC_Os08g41940);qGW8|OsSPL16|GW8#(LOC_Os08g41940);qGW8|OsSPL16|GW8#(LOC_Os08g41940);qGW8|OsSPL16|GW8#(LOC_Os08g41940);qGW8|OsSPL16|GW8#(LOC_Os08g41940);qGW8|OsSPL16|GW8#(LOC_Os08g41940);qGW8|OsSPL16|GW8#(LOC_Os08g41940);qGW8|OsSPL16|GW8#(LOC_Os08g41940);qGW8|OsSPL16|GW8#(LOC_Os08g41940);qGW8|OsSPL16|GW8#(LOC_Os08g41940);qGW8|OsSPL16|GW8#(LOC_Os0…	We also show that a marker-assisted strategy targeted at elite alleles of GS3 and OsSPL16 underlying grain size and shape can be effectively used to simultaneously improve grain quality and yield.#(grain quality#(qGW8|OsSPL16|GW8#(LOC_Os08g41940)));We also show that a marker-assisted strategy targeted at elite alleles of GS3 and OsSPL16 underlying grain size and shape can be effectively used to s…	-	-	-	Zm00001eb175190;Zm00001eb175150	-;TGA1#(Zm00001eb175150)	Teosinte glume architecture 1.#(Zm00001eb175190);Teosinte glume architecture 1 (Fragment).#(Zm00001eb175150)	4.30678	6.89377	1.10258	0.23699	0	RNA biosynthesis	SBP	-0.245336
sbi-miR156.4	Sobic.002G312200	1	-1	665	684	UGACAGAAGAGAGCGAGCAC	::::: :::::::::::::	AUGCUCUCUCUCUUCUGUCA	Cleavage	-	-	-	-	-	-	Zm00001eb105640	-	Squamosa promoter-binding-like protein 13	21.5876	34.9386	1.73293	0.381016	0	RNA biosynthesis	SBP	-0.227774
sbi-miR156.4	Sobic.005G072900	2.5	-1	57	76	UGACAGAAGAGAGCGAGCAC	::::.:::.: ::::::::	CUGCUUGCUUUGUUCUGUCA	Cleavage	-	-	-	-	-	-	-	-	-	0.0697231	0.112471	0	0	0	-	-	-0.221371
sbi-miR156.4	Sobic.001G233700	3.5	-1	501	520	UGACAGAAGAGAGCGAGCAC	:::.::::::::::::	GCCGUCGUUCUCUUCUGUCA	Cleavage	LOC_Os10g30910	-	-	AT2G46060	-	transmembrane protein-like protein.	Zm00001eb222430	-	Transmembrane protein-related	10.0862	15.6407	3.11982	1.70689	0.754842	-	-	-0.218858
sbi-miR156.4	Sobic.007G139000	2.5	-1	1416	1435	UGACAGAAGAGAGCGAGCAC	:::: :.:::.::.:::::	CUGCUGGUUCUUUUUUGUCA	Cleavage	-	-	-	-	-	-	Zm00001eb041310;Zm00001eb180020	-;-	Mini zinc finger protein 2.#(Zm00001eb041310);Mini zinc finger protein 2.#(Zm00001eb180020)	4.01862	7.99626	0.0339696	0.0338005	0	RNA biosynthesis	ZF-HD	-0.185605
sbi-miR156.4	Sobic.004G058900	1	-1	966	985	UGACAGAAGAGAGCGAGCAC	:::::: :::::::::::::	GUGCUCUCUCUCUUCUGUCA	Cleavage	LOC_Os06g45310	-	-	-	-	-	Zm00001eb233320	-	Squamosa promoter-binding-like protein 12	22.5702	17.7974	19.8398	12.0484	3.10543	RNA biosynthesis	SBP	-0.150207
sbi-miR156.4	Sobic.007G210200	1	-1	1245	1264	UGACAGAAGAGAGCGAGCAC	:::::: :::::::::::::	GUGCUCUCUCUCUUCUGUCA	Cleavage	LOC_Os08g39890;LOC_Os08g39890;LOC_Os08g39890;LOC_Os08g39890;LOC_Os08g39890;LOC_Os08g39890;LOC_Os08g39890;LOC_Os08g39890;LOC_Os08g39890;LOC_Os08g39890;LOC_Os08g39890;LOC_Os08g39890;LOC_Os08g39890;LOC_Os08g39890;LOC_Os08g39890;LOC_Os08g39890;LOC_Os08g39890;LOC_Os08g39890;LOC_Os08g39890;LOC_Os08g39890;LOC_Os08g39890;LOC_Os08g39890;LOC_Os08g39890;LOC_Os08g39890;LOC_Os08g39890;LOC_Os08g39890;LOC_Os08g…	OsSPL14|IPA1|WFP#(LOC_Os08g39890);OsSPL14|IPA1|WFP#(LOC_Os08g39890);OsSPL14|IPA1|WFP#(LOC_Os08g39890);OsSPL14|IPA1|WFP#(LOC_Os08g39890);OsSPL14|IPA1|WFP#(LOC_Os08g39890);OsSPL14|IPA1|WFP#(LOC_Os08g39890);OsSPL14|IPA1|WFP#(LOC_Os08g39890);OsSPL14|IPA1|WFP#(LOC_Os08g39890);OsSPL14|IPA1|WFP#(LOC_Os08g39890);OsSPL14|IPA1|WFP#(LOC_Os08g39890);OsSPL14|IPA1|WFP#(LOC_Os08g39890);OsSPL14|IPA1|WFP#(LOC_Os0…	Two studies describe how regulatory variation at the rice gene OsSPL14 can lead to altered plant morphology and improve grain yield.#(yield#(OsSPL14|IPA1|WFP#(LOC_Os08g39890)));We demonstrate that a point mutation in OsSPL14 perturbs OsmiR156-directed regulation of OsSPL14, generating an 'ideal' rice plant with a reduced tiller number, increased lodging resistance and enhanced grain yield.#(lodgi…	AT3G57920;AT2G42200	SQUAMOSA PROMOTER BINDING PROTEIN-LIKE 15 (SPL15)#(AT3G57920);SQUAMOSA PROMOTER BINDING PROTEIN-LIKE 9 (SPL9)#(AT2G42200)	Encodes a putative transcriptional regulator that is involved in the vegetative to reproductive phase transition. Expression is regulated by MIR156b.#(AT3G57920);Encodes a putative transcriptional regulator that is involved in the vegetative to reproductive phase transition. Expression is regulated by MIR156b. SPL activity nonautonomously inhibits initiation of new leaves at the shoot apical meri…	Zm00001eb035030	-	Squamosa promoter-binding-like protein 17	15.3145	38.4526	1.59527	1.0895	0.702934	RNA biosynthesis	SBP	-0.148619
sbi-miR156.4	Sobic.002G303300	4	-1	2883	2902	UGACAGAAGAGAGCGAGCAC	::::::::::: :::::	AUGCUCGCUCUCAUCUGUGG	Cleavage	LOC_Os07g30020	-	-	-	-	-	Zm00001eb105000	-	FT-interacting protein 1	49.671	97.9356	20.9164	13.355	3.25057	-	-	-0.141682
sbi-miR156.4	Sobic.002G257900	1	-1	1122	1141	UGACAGAAGAGAGCGAGCAC	:::::: :::::::::::::	GUGCUCUCUCUCUUCUGUCA	Cleavage	LOC_Os09g32944;LOC_Os09g32944;LOC_Os09g32944;LOC_Os09g32944;LOC_Os09g32944;LOC_Os09g32944;LOC_Os09g32944;LOC_Os09g32944;LOC_Os09g32944;LOC_Os09g32944;LOC_Os09g32944;LOC_Os09g32944;LOC_Os09g32944;LOC_Os09g32944;LOC_Os09g32944;LOC_Os09g32944;LOC_Os09g32944;LOC_Os09g32944;LOC_Os09g32944;LOC_Os09g32944;LOC_Os09g32944;LOC_Os09g32944;LOC_Os09g32944;LOC_Os09g32944	OsSPL18#(LOC_Os09g32944);OsSPL18#(LOC_Os09g32944);OsSPL18#(LOC_Os09g32944);OsSPL18#(LOC_Os09g32944);OsSPL18#(LOC_Os09g32944);OsSPL18#(LOC_Os09g32944);OsSPL18#(LOC_Os09g32944);OsSPL18#(LOC_Os09g32944);OsSPL18#(LOC_Os09g32944);OsSPL18#(LOC_Os09g32944);OsSPL18#(LOC_Os09g32944);OsSPL18#(LOC_Os09g32944);OsSPL18#(LOC_Os09g32944);OsSPL18#(LOC_Os09g32944);OsSPL18#(LOC_Os09g32944);OsSPL18#(LOC_Os09g32944)…	Transcriptional activation experiments indicated that OsSPL18 is a functional transcription factor with activation domains in both the N-terminus and C-terminus, and both activation domains are indispensable for its biological functions.#(transcription factor#(OsSPL18#(LOC_Os09g32944)));In this study, we studied the biological function of OsSPL18 during grain and panicle development in rice.#(pan…	AT5G50570;AT5G50670	SQUAMOSA PROMOTER-BINDING PROTEIN LIKE 13A (SPL13A)#(AT5G50570);SQUAMOSA PROMOTER-BINDING PROTEIN LIKE 13B (SPL13B)#(AT5G50670)	Together with SPL13B involved in floral transition. Expression reduced by Verticillium dahliae SRNAs which affects the plant's miR157d which targets SPL13A and B.#(AT5G50570);Together with SPL13B involved in floral transition. Expression reduced by Verticillium dahliae SRNAs which affects the plant's miR157d which targets SPL13A and B.#(AT5G50670)	Zm00001eb102440	TGA1	Teosinte glume architecture 1	2.81358	2.5418	1.25839	1.22839	0.231261	RNA biosynthesis	SBP	-0.0968554
sbi-miR156.4	Sobic.006G064450	3.5	-1	509	528	UGACAGAAGAGAGCGAGCAC	:::: ::::::::::::.	GUGCAGGCUCUCUUCUGUUU	Cleavage	-	-	-	-	-	-	-	-	-	0.0109936	0.01089	0.127522	0.722373	0.9165	-	-	0.354644
sbi-miR156.4	Sobic.002G062500	4.75	-1	1995	2016	UGACAGA--AGAGAGCGAGCAC	::::::::::::: :.::::.	GUGCUCGCUCUCUCUUUUGUCG	Cleavage	LOC_Os07g09060;LOC_Os07g09060;LOC_Os07g09060;LOC_Os07g09060;LOC_Os07g09060;LOC_Os07g09060;LOC_Os07g09060;LOC_Os07g09060;LOC_Os07g09060;LOC_Os07g09060;LOC_Os07g09060;LOC_Os07g09060;LOC_Os07g09060;LOC_Os07g09060	MMSDH#(LOC_Os07g09060);MMSDH#(LOC_Os07g09060);MMSDH#(LOC_Os07g09060);MMSDH#(LOC_Os07g09060);MMSDH#(LOC_Os07g09060);MMSDH#(LOC_Os07g09060);MMSDH#(LOC_Os07g09060);MMSDH#(LOC_Os07g09060);MMSDH#(LOC_Os07g09060);MMSDH#(LOC_Os07g09060);MMSDH#(LOC_Os07g09060);MMSDH#(LOC_Os07g09060);MMSDH#(LOC_Os07g09060);MMSDH#(LOC_Os07g09060)	MMSDH responded to auxin and gibberellin, but did not respond to brassinolide and cytokinin.#(GA#(MMSDH#(LOC_Os07g09060)));Furthermore, the amount of MMSDH in slr1, a constitutive gibberellin response mutant, was 2-fold that of wild type.#(GA#(MMSDH#(LOC_Os07g09060)));MMSDH was detected in cultured suspension cells, root and leaf sheath, but not in leaf blades.#(leaf#(MMSDH#(LOC_Os07g09060)));MMS…	AT2G14170	ALDEHYDE DEHYDROGENASE 6B2 (ALDH6B2)	Arabidopsis thaliana methylmalonate-semialdehyde dehydrogenase.	Zm00001eb302330	-	Methylmalonate-semialdehyde dehydrogenase (CoA acylating)	59.1924	61.2569	41.9369	68.7518	38.842	Amino acid metabolism;Enzyme classification	-	0.716309
sbi-miR156.5	Sobic.004G036900	1	-1	1506	1525	UGACAGAAGAGAGUGAGCAC	:::::: :::::::::::::	GUGCUCUCUCUCUUCUGUCA	Cleavage	LOC_Os02g04680;LOC_Os02g04680;LOC_Os02g04680	OsSPL3#(LOC_Os02g04680);OsSPL3#(LOC_Os02g04680);OsSPL3#(LOC_Os02g04680)	Map-based cloning revealed that lcrn1 is caused by a mutation of a putative transcription factor coding gene OsSPL3 (SQUAMOSA PROMOTER-BINDING PROTEIN-LIKE3).#(transcription factor#(OsSPL3#(LOC_Os02g04680)));Chromatin immunoprecipitation sequencing assays of OsSPL3-binding sites and RNA-sequencing of differentially expressed transcripts in lcrn1 further identified potential direct targets of OsSP…	AT1G27370;AT5G43270	SQUAMOSA PROMOTER BINDING PROTEIN-LIKE 10 (SPL10)#(AT1G27370);SQUAMOSA PROMOTER BINDING PROTEIN-LIKE 2 (SPL2)#(AT5G43270)	In conjunction with SPL11 and SPL2, SPL10 redundantly controls proper development of lateral organs in association with shoot maturation in the reproductive phase. SPL2, SPL10, and SPL11, suppress root regeneration with age by inhibiting wound-induced auxin biosynthesis. SPL10 also controls lamina shape during vegetative development.#(AT1G27370);Member of the SPL (squamosa-promoter binding protei…	Zm00001eb232050	SPL3	Squamosa promoter-binding-like protein 2	16.4841	18.6018	8.78953	3.73966	1.18234	RNA biosynthesis	SBP	-0.958854
sbi-miR156.5	Sobic.005G005000	3.5	-1	8887	8906	UGACAGAAGAGAGUGAGCAC	:::::::::::.::.: :..	GUGCUCACUCUUUUUUUUUG	Cleavage	LOC_Os11g26140;LOC_Os11g26140	ARK1#(LOC_Os11g26140);ARK1#(LOC_Os11g26140)	Mutation of rice ARK1 causes a significant reduction in vesicles, the fungal storage structures, and a concomitant reduction in overall root colonization by the AM fungus Rhizophagus irregularis.#(root#(ARK1#(LOC_Os11g26140)));Co-cultivation with wild-type plants restores vesicle and spore formation, suggesting ARK1 function is required for the completion of the fungal life-cycle, thereby definin…	-	-	-	Zm00001eb094200	-	Cysteine-rich receptor-like protein kinase 40	3.99877	3.1752	2.11798	0.982084	0.536651	Enzyme classification;External stimuli response;Protein modification	-	-0.952482
sbi-miR156.5	Sobic.004G058900	1	-1	966	985	UGACAGAAGAGAGUGAGCAC	:::::: :::::::::::::	GUGCUCUCUCUCUUCUGUCA	Cleavage	LOC_Os06g45310	-	-	-	-	-	Zm00001eb233320	-	Squamosa promoter-binding-like protein 12	22.5702	17.7974	19.8398	12.0484	3.10543	RNA biosynthesis	SBP	-0.937847
sbi-miR156.5	Sobic.002G257900	1	-1	1122	1141	UGACAGAAGAGAGUGAGCAC	:::::: :::::::::::::	GUGCUCUCUCUCUUCUGUCA	Cleavage	LOC_Os09g32944;LOC_Os09g32944;LOC_Os09g32944;LOC_Os09g32944;LOC_Os09g32944;LOC_Os09g32944;LOC_Os09g32944;LOC_Os09g32944;LOC_Os09g32944;LOC_Os09g32944;LOC_Os09g32944;LOC_Os09g32944;LOC_Os09g32944;LOC_Os09g32944;LOC_Os09g32944;LOC_Os09g32944;LOC_Os09g32944;LOC_Os09g32944;LOC_Os09g32944;LOC_Os09g32944;LOC_Os09g32944;LOC_Os09g32944;LOC_Os09g32944;LOC_Os09g32944	OsSPL18#(LOC_Os09g32944);OsSPL18#(LOC_Os09g32944);OsSPL18#(LOC_Os09g32944);OsSPL18#(LOC_Os09g32944);OsSPL18#(LOC_Os09g32944);OsSPL18#(LOC_Os09g32944);OsSPL18#(LOC_Os09g32944);OsSPL18#(LOC_Os09g32944);OsSPL18#(LOC_Os09g32944);OsSPL18#(LOC_Os09g32944);OsSPL18#(LOC_Os09g32944);OsSPL18#(LOC_Os09g32944);OsSPL18#(LOC_Os09g32944);OsSPL18#(LOC_Os09g32944);OsSPL18#(LOC_Os09g32944);OsSPL18#(LOC_Os09g32944)…	Transcriptional activation experiments indicated that OsSPL18 is a functional transcription factor with activation domains in both the N-terminus and C-terminus, and both activation domains are indispensable for its biological functions.#(transcription factor#(OsSPL18#(LOC_Os09g32944)));In this study, we studied the biological function of OsSPL18 during grain and panicle development in rice.#(pan…	AT5G50570;AT5G50670	SQUAMOSA PROMOTER-BINDING PROTEIN LIKE 13A (SPL13A)#(AT5G50570);SQUAMOSA PROMOTER-BINDING PROTEIN LIKE 13B (SPL13B)#(AT5G50670)	Together with SPL13B involved in floral transition. Expression reduced by Verticillium dahliae SRNAs which affects the plant's miR157d which targets SPL13A and B.#(AT5G50570);Together with SPL13B involved in floral transition. Expression reduced by Verticillium dahliae SRNAs which affects the plant's miR157d which targets SPL13A and B.#(AT5G50670)	Zm00001eb102440	TGA1	Teosinte glume architecture 1	2.81358	2.5418	1.25839	1.22839	0.231261	RNA biosynthesis	SBP	-0.935038
sbi-miR156.5	Sobic.002G247800	1	-1	1325	1344	UGACAGAAGAGAGUGAGCAC	:::::: :::::::::::::	GUGCUCUCUCUCUUCUGUCA	Cleavage	LOC_Os09g31438;LOC_Os09g31438	OsSPL17#(LOC_Os09g31438);OsSPL17#(LOC_Os09g31438)	The uncovered miR156/529-OsSPL7/14/17-OsAOS2/OsNPR1 regulatory network provides a potential strategy to genetically improve rice disease resistance.#(disease#(OsSPL17#(LOC_Os09g31438)));The uncovered miR156/529-OsSPL7/14/17-OsAOS2/OsNPR1 regulatory network provides a potential strategy to genetically improve rice disease resistance.#(disease resistance#(OsSPL17#(LOC_Os09g31438)))	AT3G57920;AT2G42200	SQUAMOSA PROMOTER BINDING PROTEIN-LIKE 15 (SPL15)#(AT3G57920);SQUAMOSA PROMOTER BINDING PROTEIN-LIKE 9 (SPL9)#(AT2G42200)	Encodes a putative transcriptional regulator that is involved in the vegetative to reproductive phase transition. Expression is regulated by MIR156b.#(AT3G57920);Encodes a putative transcriptional regulator that is involved in the vegetative to reproductive phase transition. Expression is regulated by MIR156b. SPL activity nonautonomously inhibits initiation of new leaves at the shoot apical meri…	Zm00001eb316740	-	Squamosa promoter-binding-like protein 17	8.46788	7.22986	2.52576	0.505369	0.141671	RNA biosynthesis	SBP	-0.910259
sbi-miR156.5	Sobic.003G298900	2	-1	982	1001	UGACAGAAGAGAGUGAGCAC	::::::.:::::::: :::	AUGCUCAUUCUCUUCUUUCA	Cleavage	LOC_Os01g55040	-	-	-	-	-	Zm00001eb152900	-	-	96.7887	115.764	32.3288	17.8677	4.46837	Cell wall organisation;Enzyme classification	-	-0.900368
sbi-miR156.5	Sobic.010G254200	1	-1	1513	1532	UGACAGAAGAGAGUGAGCAC	:::::: :::::::::::::	GUGCUCUCUCUCUUCUGUCA	Cleavage	LOC_Os06g49010	-	-	AT1G27370;AT5G43270	SQUAMOSA PROMOTER BINDING PROTEIN-LIKE 10 (SPL10)#(AT1G27370);SQUAMOSA PROMOTER BINDING PROTEIN-LIKE 2 (SPL2)#(AT5G43270)	In conjunction with SPL11 and SPL2, SPL10 redundantly controls proper development of lateral organs in association with shoot maturation in the reproductive phase. SPL2, SPL10, and SPL11, suppress root regeneration with age by inhibiting wound-induced auxin biosynthesis. SPL10 also controls lamina shape during vegetative development.#(AT1G27370);Member of the SPL (squamosa-promoter binding protei…	Zm00001eb227180	LOC100283160	Squamosa-promoter binding protein-like protein	15.9628	14.1628	2.75045	1.01561	0.076433	RNA biosynthesis	SBP	-0.870961
sbi-miR156.5	Sobic.009G131600	3	-1	3622	3641	UGACAGAAGAGAGUGAGCAC	::::::::.:::::: ::	UUGCUCACUUUCUUCUCUCU	Cleavage	LOC_Os05g33500	-	-	AT4G02990	BELAYA SMERT (BSM)	Encodes BELAYA SMERT (BSM), a plastid-localized protein homologous to mitochondrial transcription termination factors (mTERF) found in animal. Mutant bsm cells are albino, are compromised in growth, and suffer defects in global plastidic gene expression. The mRNA is cell-to-cell mobile.	Zm00001eb349900	-	transcription termination factor MTERF4	7.43097	11.4255	6.69353	2.61249	3.44843	RNA processing	-	-0.853271
sbi-miR156.5	Sobic.010G209800	2	-1	1441	1460	UGACAGAAGAGAGUGAGCAC	::: ::.::::::.:::::	CUGCCCAUUCUCUUUUGUCA	Cleavage	LOC_Os06g44050;LOC_Os06g44050	Sdt97#(LOC_Os06g44050);Sdt97#(LOC_Os06g44050)	Sequence of the candidate genes in the target region revealed that a base transversion from G to C occurred in the 5' untranslated region of Sdt97 qRT-PCR results confirmed that the transversion induced obvious change in the expression pattern of Sdt97 at different growth and developmental stages.#(growth#(Sdt97#(LOC_Os06g44050)));A semi- dwarf mutant gene Sdt97 was previously described.#(dwarf#(…	-	-	-	Zm00001eb275040	-	Putative GMP synthase [glutamine-hydrolyzing]	8.1009	5.57142	1.36038	1.25045	0.157452	-	-	-0.84154
sbi-miR156.5	Sobic.002G312300	1	-1	1009	1028	UGACAGAAGAGAGUGAGCAC	::::: :::::::::::::	AUGCUCUCUCUCUUCUGUCA	Cleavage	-	-	-	-	-	-	Zm00001eb322280	-	SBP-box transcription factor	53.916	48.6579	4.84009	0.42303	0	RNA biosynthesis	SBP	-0.840628
sbi-miR156.5	Sobic.007G193500	1	-1	1812	1831	UGACAGAAGAGAGUGAGCAC	:::::: :::::::::::::	GUGCUCUCUCUCUUCUGUCA	Cleavage	LOC_Os08g41940;LOC_Os08g41940;LOC_Os08g41940;LOC_Os08g41940;LOC_Os08g41940;LOC_Os08g41940;LOC_Os08g41940;LOC_Os08g41940;LOC_Os08g41940;LOC_Os08g41940;LOC_Os08g41940;LOC_Os08g41940;LOC_Os08g41940;LOC_Os08g41940;LOC_Os08g41940	qGW8|OsSPL16|GW8#(LOC_Os08g41940);qGW8|OsSPL16|GW8#(LOC_Os08g41940);qGW8|OsSPL16|GW8#(LOC_Os08g41940);qGW8|OsSPL16|GW8#(LOC_Os08g41940);qGW8|OsSPL16|GW8#(LOC_Os08g41940);qGW8|OsSPL16|GW8#(LOC_Os08g41940);qGW8|OsSPL16|GW8#(LOC_Os08g41940);qGW8|OsSPL16|GW8#(LOC_Os08g41940);qGW8|OsSPL16|GW8#(LOC_Os08g41940);qGW8|OsSPL16|GW8#(LOC_Os08g41940);qGW8|OsSPL16|GW8#(LOC_Os08g41940);qGW8|OsSPL16|GW8#(LOC_Os0…	We also show that a marker-assisted strategy targeted at elite alleles of GS3 and OsSPL16 underlying grain size and shape can be effectively used to simultaneously improve grain quality and yield.#(grain quality#(qGW8|OsSPL16|GW8#(LOC_Os08g41940)));We also show that a marker-assisted strategy targeted at elite alleles of GS3 and OsSPL16 underlying grain size and shape can be effectively used to s…	-	-	-	Zm00001eb175190;Zm00001eb175150	-;TGA1#(Zm00001eb175150)	Teosinte glume architecture 1.#(Zm00001eb175190);Teosinte glume architecture 1 (Fragment).#(Zm00001eb175150)	4.30678	6.89377	1.10258	0.23699	0	RNA biosynthesis	SBP	-0.838753
sbi-miR156.5	Sobic.003G406600	1	-1	2174	2193	UGACAGAAGAGAGUGAGCAC	:::::: :::::::::::::	GUGCUCUCUCUCUUCUGUCA	Cleavage	LOC_Os01g69830;LOC_Os01g69830	OsSPL2#(LOC_Os01g69830);OsSPL2#(LOC_Os01g69830)	The results suggested that H(2) O(2) accumulation in rice suppresses the expression of miR156, and induces the expression of its target genes, OsSPL2 and OsTIFY11b, whose proteins interact in the nucleus to regulate the expression of OsRBBI3-3, which is involved in plant defense.#(defense#(OsSPL2#(LOC_Os01g69830))); The results suggested that H(2) O(2) accumulation in rice suppresses the expressi…	-	-	-	Zm00001eb143110	-	SBP-type domain-containing protein	25.3103	32.1427	3.19254	1.01094	0.210485	RNA biosynthesis	SBP	-0.83603
sbi-miR156.5	Sobic.001G408800	2	-1	1009	1028	UGACAGAAGAGAGUGAGCAC	: ::::.:::.::::::::	CUCCUCAUUCUUUUCUGUCA	Cleavage	LOC_Os03g17900	-	-	AT3G09690;AT5G02970	-;-	alpha/beta-Hydrolases superfamily protein.#(AT3G09690);alpha/beta-Hydrolases superfamily protein.#(AT5G02970)	Zm00001eb013220	-	AB hydrolase-1 domain-containing protein	54.7408	30.6232	17.2553	12.966	4.80406	-	-	-0.83266
sbi-miR156.5	Sobic.001G221601	3	-1	1340	1359	UGACAGAAGAGAGUGAGCAC	::::.:::.::::.: :::	AUGCUUACUUUCUUUUUUCA	Cleavage	-	-	-	-	-	-	Zm00001eb046010	-	-	2.08471	1.38558	2.028	0.93237	0.587922	-	-	-0.832356
sbi-miR156.5	Sobic.006G171000	1	-1	1018	1037	UGACAGAAGAGAGUGAGCAC	:::::: :::::::::::::	GUGCUCUCUCUCUUCUGUCA	Cleavage	LOC_Os04g46580;LOC_Os04g46580;LOC_Os04g46580;LOC_Os04g46580;LOC_Os04g46580;LOC_Os04g46580;LOC_Os04g46580;LOC_Os04g46580;LOC_Os04g46580;LOC_Os04g46580;LOC_Os04g46580;LOC_Os04g46580;LOC_Os04g46580;LOC_Os04g46580;LOC_Os04g46580;LOC_Os04g46580;LOC_Os04g46580;LOC_Os04g46580;LOC_Os04g46580;LOC_Os04g46580;LOC_Os04g46580	OsSPL7#(LOC_Os04g46580);OsSPL7#(LOC_Os04g46580);OsSPL7#(LOC_Os04g46580);OsSPL7#(LOC_Os04g46580);OsSPL7#(LOC_Os04g46580);OsSPL7#(LOC_Os04g46580);OsSPL7#(LOC_Os04g46580);OsSPL7#(LOC_Os04g46580);OsSPL7#(LOC_Os04g46580);OsSPL7#(LOC_Os04g46580);OsSPL7#(LOC_Os04g46580);OsSPL7#(LOC_Os04g46580);OsSPL7#(LOC_Os04g46580);OsSPL7#(LOC_Os04g46580);OsSPL7#(LOC_Os04g46580);OsSPL7#(LOC_Os04g46580);OsSPL7#(LOC_Os0…	Plants over-expressing OsSPL7 had a reduced tiller number, while OsSPL7 RNAi plants had an increased tiller number and a reduced height.#(tiller#(OsSPL7#(LOC_Os04g46580)));Genetic analysis showed that OsSPL7 is a target of miR156f that regulates plant architecture.#(architecture#(OsSPL7#(LOC_Os04g46580)));Plants over-expressing OsSPL7 had a reduced tiller number, while OsSPL7 RNAi plants had an i…	-	-	-	Zm00001eb429720	-	SBP transcription factor (Fragment)	0.0935035	0.139901	0.00801894	0	0	RNA biosynthesis	SBP	-0.806206
sbi-miR156.5	Sobic.002G312200	1	-1	665	684	UGACAGAAGAGAGUGAGCAC	::::: :::::::::::::	AUGCUCUCUCUCUUCUGUCA	Cleavage	-	-	-	-	-	-	Zm00001eb105640	-	Squamosa promoter-binding-like protein 13	21.5876	34.9386	1.73293	0.381016	0	RNA biosynthesis	SBP	-0.792881
sbi-miR156.5	Sobic.005G072900	3	-1	57	76	UGACAGAAGAGAGUGAGCAC	::::..::.: ::::::::	CUGCUUGCUUUGUUCUGUCA	Cleavage	-	-	-	-	-	-	-	-	-	0.0697231	0.112471	0	0	0	-	-	-0.772369
sbi-miR156.5	Sobic.007G210200	1	-1	1245	1264	UGACAGAAGAGAGUGAGCAC	:::::: :::::::::::::	GUGCUCUCUCUCUUCUGUCA	Cleavage	LOC_Os08g39890;LOC_Os08g39890;LOC_Os08g39890;LOC_Os08g39890;LOC_Os08g39890;LOC_Os08g39890;LOC_Os08g39890;LOC_Os08g39890;LOC_Os08g39890;LOC_Os08g39890;LOC_Os08g39890;LOC_Os08g39890;LOC_Os08g39890;LOC_Os08g39890;LOC_Os08g39890;LOC_Os08g39890;LOC_Os08g39890;LOC_Os08g39890;LOC_Os08g39890;LOC_Os08g39890;LOC_Os08g39890;LOC_Os08g39890;LOC_Os08g39890;LOC_Os08g39890;LOC_Os08g39890;LOC_Os08g39890;LOC_Os08g…	OsSPL14|IPA1|WFP#(LOC_Os08g39890);OsSPL14|IPA1|WFP#(LOC_Os08g39890);OsSPL14|IPA1|WFP#(LOC_Os08g39890);OsSPL14|IPA1|WFP#(LOC_Os08g39890);OsSPL14|IPA1|WFP#(LOC_Os08g39890);OsSPL14|IPA1|WFP#(LOC_Os08g39890);OsSPL14|IPA1|WFP#(LOC_Os08g39890);OsSPL14|IPA1|WFP#(LOC_Os08g39890);OsSPL14|IPA1|WFP#(LOC_Os08g39890);OsSPL14|IPA1|WFP#(LOC_Os08g39890);OsSPL14|IPA1|WFP#(LOC_Os08g39890);OsSPL14|IPA1|WFP#(LOC_Os0…	Two studies describe how regulatory variation at the rice gene OsSPL14 can lead to altered plant morphology and improve grain yield.#(yield#(OsSPL14|IPA1|WFP#(LOC_Os08g39890)));We demonstrate that a point mutation in OsSPL14 perturbs OsmiR156-directed regulation of OsSPL14, generating an 'ideal' rice plant with a reduced tiller number, increased lodging resistance and enhanced grain yield.#(lodgi…	AT3G57920;AT2G42200	SQUAMOSA PROMOTER BINDING PROTEIN-LIKE 15 (SPL15)#(AT3G57920);SQUAMOSA PROMOTER BINDING PROTEIN-LIKE 9 (SPL9)#(AT2G42200)	Encodes a putative transcriptional regulator that is involved in the vegetative to reproductive phase transition. Expression is regulated by MIR156b.#(AT3G57920);Encodes a putative transcriptional regulator that is involved in the vegetative to reproductive phase transition. Expression is regulated by MIR156b. SPL activity nonautonomously inhibits initiation of new leaves at the shoot apical meri…	Zm00001eb035030	-	Squamosa promoter-binding-like protein 17	15.3145	38.4526	1.59527	1.0895	0.702934	RNA biosynthesis	SBP	-0.709851
sbi-miR156.5	Sobic.008G053500	3.5	-1	1011	1030	UGACAGAAGAGAGUGAGCAC	:::::.: :::: :::::::	GUGCUUAAUCUCCUCUGUCA	Cleavage	LOC_Os12g07270	-	-	-	-	-	Zm00001eb139050	-	probable sodium/metabolite cotransporter BASS1	0.309478	0.235813	2.33063	1.10105	0.0401062	Solute transport	-	-0.0934916
sbi-miR156.5	Sobic.005G120600	1	-1	950	969	UGACAGAAGAGAGUGAGCAC	:::::: :::::::::::::	GUGCUCUCUCUCUUCUGUCA	Cleavage	LOC_Os11g30370	-	-	AT5G50570;AT5G50670	SQUAMOSA PROMOTER-BINDING PROTEIN LIKE 13A (SPL13A)#(AT5G50570);SQUAMOSA PROMOTER-BINDING PROTEIN LIKE 13B (SPL13B)#(AT5G50670)	Together with SPL13B involved in floral transition. Expression reduced by Verticillium dahliae SRNAs which affects the plant's miR157d which targets SPL13A and B.#(AT5G50570);Together with SPL13B involved in floral transition. Expression reduced by Verticillium dahliae SRNAs which affects the plant's miR157d which targets SPL13A and B.#(AT5G50670)	Zm00001eb169410	-	squamosa promoter-binding-like protein 16	5.35797	6.40009	2.40113	3.53539	5.90448	RNA biosynthesis	SBP	-0.0777328
sbi-miR159.1	Sobic.003G093200	3	-1	419	438	CUUGGAUUGAAGGGAGCUCC	::::::.:::::: ::::	AGAGCUCUCUUCAAACCAAU	Cleavage	-	-	-	-	-	-	-	-	-	0.186865	0.0384503	1.75719	0.40113	0	-	-	-0.447252
sbi-miR159.1	Sobic.006G072400	3	-1	1472	1491	CUUGGAUUGAAGGGAGCUCC	::::::.:: .::::::.:	CGAGCUCUCUGUAAUCCAGG	Translation	LOC_Os04g33760	-	-	-	-	-	Zm00001eb083770	-	-	14.4867	6.53106	14.75	2.85827	40.1488	-	-	-0.37709
sbi-miR159.1	Sobic.001G183100	2.5	-1	1209	1228	CUUGGAUUGAAGGGAGCUCC	:::::::::::::: ::::	GGAGCUCCCUUCAAACCAAU	Cleavage	LOC_Os03g38210;LOC_Os03g38210;LOC_Os03g38210;LOC_Os03g38210;LOC_Os03g38210;LOC_Os03g38210;LOC_Os03g38210	OsGAMYBL2#(LOC_Os03g38210);OsGAMYBL2#(LOC_Os03g38210);OsGAMYBL2#(LOC_Os03g38210);OsGAMYBL2#(LOC_Os03g38210);OsGAMYBL2#(LOC_Os03g38210);OsGAMYBL2#(LOC_Os03g38210);OsGAMYBL2#(LOC_Os03g38210)	Furthermore, OsGSK2, a key negative player in BR signaling, interacts with OsGAMYBL2 and prevents it from being degraded under 24-epibrassinolide treatment, whereas SLR1, a rice DELLA protein negatively regulating GA signaling, interacts with OsGAMYBL2 and prevents OsGAMYBL2 from binding to the target gene promoter.#(GA#(OsGAMYBL2#(LOC_Os03g38210)));GA signaling induces degradation of OsGAMYBL2 a…	-	-	-	Zm00001eb219740	-	Transcription factor GAMYB	3.46418	6.85775	24.2891	5.79444	2.39141	RNA biosynthesis	MYB	-0.270491
sbi-miR159.1	Sobic.007G177801	4	-1	607	626	CUUGGAUUGAAGGGAGCUCC	::::::.:.: ::: :::::	GGAGCUUCUUGCAAACCAAG	Translation	-	-	-	AT3G30460	-	RING/U-box superfamily protein.	-	-	-	0	0.0194764	0.0266539	0.00921101	0	Protein homeostasis	-	0.122683
sbi-miR159.1	Sobic.001G014300	3	-1	773	792	CUUGGAUUGAAGGGAGCUCC	::::::..::..::.:.::	AGAGCUCUUUUUGAUUCGAG	Cleavage	LOC_Os03g40410;LOC_Os03g40370	-;-	-;-	AT4G22060;AT4G22165;AT5G66830;AT4G22170;AT4G22180;AT1G10110	F-BOX/DUF295 BRASSICEAE-SPECIFIC 29 (ATFDB29)#(AT4G22060);F-BOX/DUF295 BRASSICEAE-SPECIFIC 30 (ATFDB30)#(AT4G22165);F-BOX/DUF295 BRASSICEAE-SPECIFIC 38 (ATFDB38)#(AT5G66830);F-BOX/DUF295 BRASSICEAE-SPECIFIC 31 (ATFDB31)#(AT4G22170);F-BOX/DUF295 BRASSICEAE-SPECIFIC 32 (ATFDB32)#(AT4G22180);F-BOX/DUF295 BRASSICEAE-SPECIFIC 1 (ATFDB1)#(AT1G10110)	F-box protein (DUF295).#(AT4G22060);F-box protein (DUF295).#(AT4G22165);F-box protein (DUF295).#(AT5G66830);F-box protein (DUF295).#(AT4G22170);F-box protein (DUF295).#(AT4G22180);F-box family protein.#(AT1G10110)	-	-	-	27.8226	19.262	21.1264	15.4053	9.66904	-	-	0.445065
sbi-miR159.1	Sobic.006G169700	3	-1	164	183	CUUGGAUUGAAGGGAGCUCC	:::::::: :::.::::::	GGAGCUCCAUUCGAUCCAAA	Cleavage	LOC_Os04g46384	-	-	AT3G60460	DUO POLLEN 1 (DUO1)	Encodes an R2R3 myb transcription factor that is required for male gamete formation, specifically for entry of the generative cell into mitosis. Specifically expressed in the male germline.	Zm00001eb074810	-	Transcription factor GAMYB	0.277235	0.119393	0.100693	0.0171971	0	Plant reproduction;RNA biosynthesis	MYB	0.542897
sbi-miR159.1	Sobic.003G331100	1.5	-1	1281	1300	CUUGGAUUGAAGGGAGCUCC	::::::::::::: ::::::	GGAGCUCCCUUCACUCCAAG	Cleavage	LOC_Os01g59660;LOC_Os01g59660;LOC_Os01g59660;LOC_Os01g59660;LOC_Os01g59660;LOC_Os01g59660;LOC_Os01g59660;LOC_Os01g59660;LOC_Os01g59660;LOC_Os01g59660;LOC_Os01g59660;LOC_Os01g59660;LOC_Os01g59660;LOC_Os01g59660;LOC_Os01g59660;LOC_Os01g59660;LOC_Os01g59660;LOC_Os01g59660;LOC_Os01g59660;LOC_Os01g59660;LOC_Os01g59660;LOC_Os01g59660;LOC_Os01g59660;LOC_Os01g59660;LOC_Os01g59660;LOC_Os01g59660;LOC_Os01g…	OsMYBGA|OsGAMYB#(LOC_Os01g59660);OsMYBGA|OsGAMYB#(LOC_Os01g59660);OsMYBGA|OsGAMYB#(LOC_Os01g59660);OsMYBGA|OsGAMYB#(LOC_Os01g59660);OsMYBGA|OsGAMYB#(LOC_Os01g59660);OsMYBGA|OsGAMYB#(LOC_Os01g59660);OsMYBGA|OsGAMYB#(LOC_Os01g59660);OsMYBGA|OsGAMYB#(LOC_Os01g59660);OsMYBGA|OsGAMYB#(LOC_Os01g59660);OsMYBGA|OsGAMYB#(LOC_Os01g59660);OsMYBGA|OsGAMYB#(LOC_Os01g59660);OsMYBGA|OsGAMYB#(LOC_Os01g59660);OsM…	Mutation of the two W boxes prevents the binding of OsWRKY71 to the mutated promoter, and releases the suppression of the OsGAMYB-activated Amy32b expression by OsWRKY71, suggesting that OsWRKY71 blocks GA signaling by functionally interfering with OsGAMYB.#(GA#(OsMYBGA|OsGAMYB#(LOC_Os01g59660)));High-level OsGAMYB expression was detected in the aleurone cells, inflorescence shoot apical region, …	AT3G11440;AT5G06100	MYB DOMAIN PROTEIN 65 (MYB65)#(AT3G11440);MYB DOMAIN PROTEIN 33 (MYB33)#(AT5G06100)	Member of the R2R3-MYB gene family. Similar to GA-induced Barley myb gene. May be induced during germination in response to GA. Double mutants with MYB33 are male sterile, showing defects in pollen development and anther development. Contains a binding site for miRNA159 and may be spatially regulated by this micro RNA. A highly conserved RNA secondary structure abuts the miR159 binding site which…	Zm00001eb150140	-	Transcription factor	28.6592	46.1665	31.975	32.3185	9.92866	Phytohormone action.gibberellin;RNA biosynthesis	MYB	0.67386
sbi-miR159.1	Sobic.008G072500	4	-1	474	493	CUUGGAUUGAAGGGAGCUCC	::::.:::.: ::::: :::	GGAGUUCCUUCCAAUCAAAG	Translation	-	-	-	AT1G22800	-	S-adenosyl-L-methionine-dependent methyltransferases superfamily protein.	Zm00001eb411080	-	Putative methyltransferase	14.2321	18.4612	13.3204	6.78424	3.99344	Cellular respiration	-	0.815002
sbi-miR159.1	Sobic.005G118600	2	-1	706	725	CUUGGAUUGAAGGGAGCUCC	::::::.::::..::::.::	GGAGCUUCCUUUGAUCCGAG	Cleavage	-	-	-	-	-	-	-	-	-	38.9727	33.6555	13.9453	10.233	3.90861	-	-	0.848089
sbi-miR159.1	Sobic.010G186100	3	-1	1067	1086	CUUGGAUUGAAGGGAGCUCC	::::::.::::: :::::	AGAGCUCUCUUCAUUCCAAA	Cleavage	-	-	-	-	-	-	Zm00001eb386370	-	Transcription factor GAMYB	47.3494	42.966	24.5467	15.5336	12.7158	RNA biosynthesis	MYB	0.849516
sbi-miR159.1	Sobic.010G230200	3	-1	1162	1181	CUUGGAUUGAAGGGAGCUCC	::::::::::::.: ::::	GGAGCUCCCUUCGAACCAAC	Cleavage	LOC_Os06g46560	-	-	-	-	-	Zm00001eb224600	LOC100272446	Myb domain protein 101	0.944577	0.728124	0	0	0	RNA biosynthesis	MYB	0.852745
sbi-miR159.1	Sobic.001G143200	3	-1	502	521	CUUGGAUUGAAGGGAGCUCC	:::::::.::.: :.::::	UGAGCUCCUUUUAUUUCAAG	Cleavage	LOC_Os03g46410	-	-	AT1G31300;AT4G19645	-;-	TRAM, LAG1 and CLN8 (TLC) lipid-sensing domain containing protein.#(AT1G31300);TRAM, LAG1 and CLN8 (TLC) lipid-sensing domain containing protein.#(AT4G19645)	Zm00001eb217740	-	TRAM LAG1 and CLN8 (TLC) lipid-sensing domain containing protein	56.9984	46.3671	11.0268	5.42193	2.60016	-	-	0.854424
sbi-miR159.1	Sobic.002G181800	2.5	-1	64	83	CUUGGAUUGAAGGGAGCUCC	::::::.::::::: :.::	UGAGCUCUCUUCAAUGCGAG	Cleavage	LOC_Os09g19930;LOC_Os09g19930;LOC_Os09g19930	ONI3#(LOC_Os09g19930);ONI3#(LOC_Os09g19930);ONI3#(LOC_Os09g19930)	Loss-of-function mutations of ONI3, which were identified as mutants with ectopic expression of KNOX genes in leaves and morphologically resembling KNOX overexpressors, showed abnormal organ fusions in developing shoots.#(shoot#(ONI3#(LOC_Os09g19930)));Expression analyses showed that ONI3 was specifically expressed in the outermost cell layer in the shoot apex throughout life cycle, and the oni3 …	AT1G72970	HOTHEAD (HTH)	Originally identified as a mutation that causes floral organs to fuse together. About 10-20% of mutants also have defects in ovules. Mutants have reduced fertility most likely as because of fusions that pistil emergence. The protein has similarity to the mandelonitrile lyase family of FAD containing oxidoreductases and is predicted to be secreted (SignalP).It is expressed in all tissue layers of …	Zm00001eb311010	-	-	83.0723	66.5769	4.72942	9.89679	1.3488	Cell wall organisation	-	0.857048
sbi-miR159.1	Sobic.009G177000	2.5	-1	799	818	CUUGGAUUGAAGGGAGCUCC	::::: .::::::::.::.:	GGAGCCUCCUUCAAUUCAGG	Cleavage	LOC_Os05g40700	-	-	AT4G10360	-	TRAM, LAG1 and CLN8 (TLC) lipid-sensing domain containing protein.	-	-	-	0.100283	1.01844	0.0694588	0.0854211	0	-	-	0.885247
sbi-miR159.1	Sobic.007G204200	3	-1	240	259	CUUGGAUUGAAGGGAGCUCC	:::::::: :::.::::::	GGAGCUCCAUUCGAUCCAAA	Cleavage	-	-	-	-	-	-	Zm00001eb035590	-	Transcription factor MYB120	0.0241422	0.0302151	0.0141666	0	0	Plant reproduction;RNA biosynthesis	MYB	0.887218
sbi-miR159.1	Sobic.009G075500	4	-1	890	909	CUUGGAUUGAAGGGAGCUCC	::::::.::: ::.:.:::	GGAGCUUCCUGCAGUUCAAC	Translation	LOC_Os05g11414;LOC_Os05g11414;LOC_Os05g11414;LOC_Os05g11414;LOC_Os05g11414;LOC_Os05g11414;LOC_Os05g11414;LOC_Os05g11414;LOC_Os05g11414;LOC_Os05g11414;LOC_Os05g11414;LOC_Os05g11414;LOC_Os05g11414;LOC_Os05g11414;LOC_Os05g11414;LOC_Os05g11414;LOC_Os05g11414;LOC_Os05g11414;LOC_Os05g11414;LOC_Os05g11414;LOC_Os05g11414;LOC_Os05g11414;LOC_Os05g11414;LOC_Os05g11414;LOC_Os05g11414;LOC_Os05g11414;LOC_Os05g…	OSMADS58#(LOC_Os05g11414);OSMADS58#(LOC_Os05g11414);OSMADS58#(LOC_Os05g11414);OSMADS58#(LOC_Os05g11414);OSMADS58#(LOC_Os05g11414);OSMADS58#(LOC_Os05g11414);OSMADS58#(LOC_Os05g11414);OSMADS58#(LOC_Os05g11414);OSMADS58#(LOC_Os05g11414);OSMADS58#(LOC_Os05g11414);OSMADS58#(LOC_Os05g11414);OSMADS58#(LOC_Os05g11414);OSMADS58#(LOC_Os05g11414);OSMADS58#(LOC_Os05g11414);OSMADS58#(LOC_Os05g11414);OSMADS58#…	By contrast, RNA-silenced lines of OSMADS58 develop astonishing flowers that reiterate a set of floral organs, including lodicules, stamens, and carpel-like organs, suggesting that determinacy of the floral meristem is severely affected.#(floral#(OSMADS58#(LOC_Os05g11414)));By contrast, RNA-silenced lines of OSMADS58 develop astonishing flowers that reiterate a set of floral organs, including lod…	-	-	-	Zm00001eb284010	-	floral homeotic protein AGAMOUS	106.113	95.3806	18.2719	7.61225	0.152863	RNA biosynthesis	MIKC_MADS	0.889248
sbi-miR159.1	Sobic.004G310500	3	-1	966	985	CUUGGAUUGAAGGGAGCUCC	:::::..::::::::. ::	AGAGCUUUCUUCAAUCUUAG	Cleavage	LOC_Os02g52880	-	-	AT1G44835	-	YbaK/aminoacyl-tRNA synthetase-associated domain-containing protein.	Zm00001eb193560	-	Prolyl-tRNA synthetase associated domain-containing protein 1	12.2858	19.0558	10.0056	5.11655	1.75549	-	-	0.898064
sbi-miR159.1	Sobic.005G162200	3	-1	416	435	CUUGGAUUGAAGGGAGCUCC	::.:.:.::::::.::::	UAAGUUUCUUUCAAUUCAAG	Cleavage	LOC_Os05g34380	-	-	-	-	-	Zm00001eb349320	-	Obtusifoliol 14-alpha demethylase	0.0059765	0.0641022	0	0	0	Enzyme classification;Lipid metabolism	-	0.906649
sbi-miR159.1	Sobic.007G136400	3.5	-1	118	137	CUUGGAUUGAAGGGAGCUCC	::: ::..:::::.:::::	GGACCUUUCUUCAGUCCAAU	Cleavage	-	-	-	-	-	-	-	-	-	4.2005	4.92179	1.33732	0.253806	0.241294	-	-	0.945132
sbi-miR159.1	Sobic.006G049300	4.5	-1	661	680	CUUGGAUUGAAGGGAGCUCC	:::::.::::::::::	AGAGCUUCCUUCAAUCCUCC	Cleavage	LOC_Os04g31030	-	-	-	-	-	Zm00001eb085850	-	Nitrate-induced NOI protein	30.7592	35.705	7.82311	8.28395	3.38529	External stimuli response	-	0.957024
sbi-miR159.1	Sobic.005G161900	3	-1	524	543	CUUGGAUUGAAGGGAGCUCC	::.:.:.::::::.::::	UAAGUUUCUUUCAAUUCAAG	Cleavage	LOC_Os05g34380	-	-	-	-	-	Zm00001eb349320	-	Obtusifoliol 14-alpha demethylase	0.0161348	0.061792	0	0	0	-	-	0.965476
sbi-miR159.1	Sobic.005G207800	2.5	-1	1628	1647	CUUGGAUUGAAGGGAGCUCC	::::::.:::::.::.:::	GGAGCUUCCUUCGAUUCAAA	Cleavage	-	-	-	-	-	-	-	-	-	41.1885	67.7132	4.71678	2.04702	1.17722	-	-	0.996949
sbi-miR159.1	Sobic.003G018000	3.5	-1	1358	1377	CUUGGAUUGAAGGGAGCUCC	::::: :::::::: ::::	GGAGCCCCCUUCAAACCAAA	Cleavage	LOC_Os01g11430	-	-	-	-	-	Zm00001eb338380	-	SPOROCYTELESS-like EAR-containing protein 2	33.4148	73.1433	0.552277	0.663096	0.2102	RNA biosynthesis	-	0.997671
sbi-miR159.2	Sobic.003G045650	4	-1	281	301	UUUGGAUUGAAGGGAGCUCUG	::: ::: .:::::::.:::	CAGCGCUGUCUUCAAUUCAAU	Cleavage	-	-	-	-	-	-	-	-	-	0.461412	0.315709	0.0722512	0.0425904	0.251586	-	-	-0.927094
sbi-miR159.2	Sobic.010G230200	3	-1	1161	1181	UUUGGAUUGAAGGGAGCUCUG	..:::::::::::.: ::::	UGGAGCUCCCUUCGAACCAAC	Cleavage	LOC_Os06g46560	-	-	-	-	-	Zm00001eb224600	LOC100272446	Myb domain protein 101	0.944577	0.728124	0	0	0	RNA biosynthesis	MYB	-0.888387
sbi-miR159.2	Sobic.004G092500	4	-1	1066	1086	UUUGGAUUGAAGGGAGCUCUG	:::: ::.::::::::...:	CAGAACUUCCUUCAAUUUGAC	Cleavage	LOC_Os06g37660	-	-	AT1G69960;AT1G59830;AT1G10430	SERINE/THREONINE PROTEIN PHOSPHATASE 2A (PP2A)#(AT1G69960);PROTEIN PHOSPHATASE 2A-1 (PP2A-1)#(AT1G59830);PROTEIN PHOSPHATASE 2A-2 (PP2A-2)#(AT1G10430)	type 2A serine/threonine protein phosphatase (PP2A) mRNA, positive regulators of SPCH and thus stomatal production.#(AT1G69960);Encodes one of the isoforms of the catalytic subunit of protein phosphatase 2A: AT1G59830/PP2A-1, AT1G10430/PP2A-2, At2g42500/PP2A-3, At3g58500/PP2A-4 [Plant Molecular Biology (1993) 21:475-485 and (1994) 26:523-528; Note that in more recent publications, there is mixed …	Zm00001eb240190	-	Serine/threonine-protein phosphatase	51.21	47.9728	13.6756	8.93393	11.6814	Cell division;Enzyme classification;Protein modification	-	-0.886088
sbi-miR159.2	Sobic.009G188500	2.5	-1	692	712	UUUGGAUUGAAGGGAGCUCUG	:::::: :::::::: :::::	CAGAGCACCCUUCAAGCCAAA	Cleavage	LOC_Os05g42240;LOC_Os05g42240;LOC_Os05g42240;LOC_Os05g42240;LOC_Os05g42240;LOC_Os05g42240;LOC_Os05g42240;LOC_Os05g42240	OsSPL#(LOC_Os05g42240);OsSPL#(LOC_Os05g42240);OsSPL#(LOC_Os05g42240);OsSPL#(LOC_Os05g42240);OsSPL#(LOC_Os05g42240);OsSPL#(LOC_Os05g42240);OsSPL#(LOC_Os05g42240);OsSPL#(LOC_Os05g42240)	OsSPL might form homodimers and interact with TEOSINTE BRANCHED1/CYCLOIDEA/PCF (TCP) transcription factor OsTCP5 via the SPL dimerization and TCP interaction domain.#(transcription factor#(OsSPL#(LOC_Os05g42240)));We showed that meiosis-specific callose deposition, chromatin organization, and centromere-specific histone H3 loading were altered in the cells corresponding to pollen mother cells in …	-	-	-	Zm00001eb292000	-	SPOROCYTELESS-like EAR-containing protein 1	2.34482	1.25612	0.0920145	0.42017	0.621681	RNA biosynthesis	-	-0.878151
sbi-miR159.2	Sobic.002G181800	3	-1	63	83	UUUGGAUUGAAGGGAGCUCUG	::::::.::::::: :.:.	GUGAGCUCUCUUCAAUGCGAG	Cleavage	LOC_Os09g19930;LOC_Os09g19930;LOC_Os09g19930	ONI3#(LOC_Os09g19930);ONI3#(LOC_Os09g19930);ONI3#(LOC_Os09g19930)	Loss-of-function mutations of ONI3, which were identified as mutants with ectopic expression of KNOX genes in leaves and morphologically resembling KNOX overexpressors, showed abnormal organ fusions in developing shoots.#(shoot#(ONI3#(LOC_Os09g19930)));Expression analyses showed that ONI3 was specifically expressed in the outermost cell layer in the shoot apex throughout life cycle, and the oni3 …	AT1G72970	HOTHEAD (HTH)	Originally identified as a mutation that causes floral organs to fuse together. About 10-20% of mutants also have defects in ovules. Mutants have reduced fertility most likely as because of fusions that pistil emergence. The protein has similarity to the mandelonitrile lyase family of FAD containing oxidoreductases and is predicted to be secreted (SignalP).It is expressed in all tissue layers of …	Zm00001eb311010	-	-	83.0723	66.5769	4.72942	9.89679	1.3488	Cell wall organisation	-	-0.870138
sbi-miR159.2	Sobic.001G140600	4	-1	1345	1365	UUUGGAUUGAAGGGAGCUCUG	:::: .:.:.::::.:.:::.	CAGACUUUCUUUCAGUUCAAG	Cleavage	LOC_Os03g46920	-	-	-	-	-	Zm00001eb217550	-	-	21.6801	19.3019	2.12265	0.346556	0.0157008	-	-	-0.867413
sbi-miR159.2	Sobic.005G140900	5	-1	408	428	UUUGGAUUGAAGGGAGCUCUG	:.:::::: :::::.::.:	CGGAGCUCGCUUCAGUCUACC	Cleavage	-	-	-	AT3G23880	-	F-box and associated interaction domains-containing protein.	-	-	-	0.0432966	0.0256633	0	0	0	-	-	-0.855301
sbi-miR159.2	Sobic.006G049300	4.5	-1	660	680	UUUGGAUUGAAGGGAGCUCUG	:::::::.::::::::::	CAGAGCUUCCUUCAAUCCUCC	Cleavage	LOC_Os04g31030	-	-	-	-	-	Zm00001eb085850	-	Nitrate-induced NOI protein	30.7592	35.705	7.82311	8.28395	3.38529	External stimuli response	-	-0.837326
sbi-miR159.2	Sobic.005G207800	1.5	-1	1627	1647	UUUGGAUUGAAGGGAGCUCUG	..:::::.:::::.::.::::	UGGAGCUUCCUUCGAUUCAAA	Cleavage	-	-	-	-	-	-	-	-	-	41.1885	67.7132	4.71678	2.04702	1.17722	-	-	-0.837055
sbi-miR159.2	Sobic.001G290100	3.5	-1	2688	2708	UUUGGAUUGAAGGGAGCUCUG	::.:::.::::.:.:...::	AAGGGCUUCCUUUAGUUUGAA	Cleavage	LOC_Os10g42196	-	-	-	-	-	Zm00001eb390530	LOC103637710	RING/FYVE/PHD zinc finger superfamily protein	108.452	102.751	23.011	21.2892	4.77848	Chromatin organisation	-	-0.830951
sbi-miR159.2	Sobic.003G018000	2.5	-1	1357	1377	UUUGGAUUGAAGGGAGCUCUG	:.:::: :::::::: :::::	CGGAGCCCCCUUCAAACCAAA	Cleavage	LOC_Os01g11430	-	-	-	-	-	Zm00001eb338380	-	SPOROCYTELESS-like EAR-containing protein 2	33.4148	73.1433	0.552277	0.663096	0.2102	RNA biosynthesis	-	-0.808371
sbi-miR159.2	Sobic.001G465200	3.5	-1	967	987	UUUGGAUUGAAGGGAGCUCUG	::::::..::::::: ::..	AAGAGCUUUCUUCAAUGCAGG	Cleavage	-	-	-	AT4G30150	-	Urb2/Npa2 family protein.	Zm00001eb007680	LOC100381737	Urb2 domain-containing protein	19.6956	29.2243	5.88364	3.59603	1.29842	-	-	-0.79798
sbi-miR159.2	Sobic.001G381800	3	-1	1387	1407	UUUGGAUUGAAGGGAGCUCUG	:.:: .:: ::::::::::::	CGGACUUCGCUUCAAUCCAAA	Cleavage	LOC_Os03g21640	-	-	AT5G05190	ENHANCED DISEASE RESISTANCE4 (EDR4)	hypothetical protein (DUF3133).	Zm00001eb015970	-	-	44.2505	33.0098	11.3955	4.10434	1.2917	-	-	-0.784045
sbi-miR159.2	Sobic.005G118600	2.5	-1	705	725	UUUGGAUUGAAGGGAGCUCUG	.:::::.::::..::::.:.	AGGAGCUUCCUUUGAUCCGAG	Cleavage	-	-	-	-	-	-	-	-	-	38.9727	33.6555	13.9453	10.233	3.90861	-	-	-0.766768
sbi-miR159.2	Sobic.010G186100	2	-1	1066	1086	UUUGGAUUGAAGGGAGCUCUG	::::::::.::::: ::::::	CAGAGCUCUCUUCAUUCCAAA	Cleavage	-	-	-	-	-	-	Zm00001eb386370	-	Transcription factor GAMYB	47.3494	42.966	24.5467	15.5336	12.7158	RNA biosynthesis	MYB	-0.751388
sbi-miR159.2	Sobic.002G419100	5	-1	221	245	UUUGGAUUGAAGGG----AGCUCUG	::::::: ::::::.::::::	CAGAGCUUGCCCCCUUCGAUCCAAC	Cleavage	LOC_Os07g48300	-	-	AT5G20920	EUKARYOTIC TRANSLATION INITIATION FACTOR 2 BETA SUBUNIT (EIF2 BETA)	protein synthesis initiation factor eIF2 beta.	Zm00001eb111600	-	Eukaryotic translation initiation factor 2 subunit beta	74.9485	101.237	45.699	21.7956	18.8763	Protein biosynthesis	-	-0.718831
sbi-miR159.2	Sobic.009G025400	4.5	-1	131	151	UUUGGAUUGAAGGGAGCUCUG	::::::::.::::.: :....	CAGAGCUCUCUUCGAACUGGG	Cleavage	LOC_Os05g03120	-	-	AT2G37080	ROP INTERACTIVE PARTNER 2 (RIP2)	Encodes RIP2 (ROP interactive partner 2), a putative Rho protein effector, interacting specifically with the active form of ROPs (Rho proteins of plants). Together with ICR5 involved in secondary wall patterning in the xylem and root hair polar growth.	Zm00001eb265540	-	interactor of constitutive active ROPs 2	6.16985	4.17122	2.26899	1.67079	0.433894	Multi-process regulation	-	-0.685882
sbi-miR159.2	Sobic.007G173150	4	-1	271	290	UUUGGAUUGAAGGGAGCUCUG	:::::::.:::::: ::.:::	CAGAGCUUCCUUCA-UCUAAA	Cleavage	-	-	-	-	-	-	Zm00001eb264500;Zm00001eb100030;Zm00001eb238990;Zm00001eb070580;Zm00001eb109070;Zm00001eb321480	-;-;-;-;-;-	SAM-dependent MTase TRM10-type domain-containing protein.#(Zm00001eb264500);-;-;SAM-dependent MTase TRM10-type domain-containing protein.#(Zm00001eb070580);-;-	1.01575	2.23493	0.515027	0.388646	0.0988669	-	-	-0.679124
sbi-miR159.2	Sobic.001G217200	5	-1	960	981	UUUG-GAUUGAAGGGAGCUCUG	:::.:::::.::::::. ::.:	CAGGGCUCCUUUCAAUUGCAGA	Cleavage	-	-	-	AT5G60690	REVOLUTA (REV)	REVOLUTA regulates meristem initiation at lateral positions. a member of a small homeodomain-leucine zipper family. Has overlapping functions with PHAVOLUTA and PHABULOSA. The mRNA is cell-to-cell mobile.	Zm00001eb045630	-	Rolled leaf2	13.3201	23.8536	7.77403	3.56918	0.547548	Plant organogenesis;RNA biosynthesis	HD-ZIP	-0.666115
sbi-miR159.2	Sobic.007G204200	2	-1	239	259	UUUGGAUUGAAGGGAGCUCUG	..::::::: :::.:::::::	UGGAGCUCCAUUCGAUCCAAA	Cleavage	-	-	-	-	-	-	Zm00001eb035590	-	Transcription factor MYB120	0.0241422	0.0302151	0.0141666	0	0	Plant reproduction;RNA biosynthesis	MYB	-0.660119
sbi-miR159.2	Sobic.005G039700	3	-1	286	306	UUUGGAUUGAAGGGAGCUCUG	:: :::::::::::::::	AAGCCCUCCCUUCAAUCCAAC	Cleavage	LOC_Os11g05540	-	-	AT5G22400	-	Rho GTPase activating protein with PAK-box/P21-Rho-binding domain-containing protein.	-	-	-	10.6718	11.021	5.74975	4.70258	0.905498	Multi-process regulation	-	-0.635794
sbi-miR159.2	Sobic.002G245000	3	-1	2001	2021	UUUGGAUUGAAGGGAGCUCUG	:::::..::::.:::.::	CCAAGCUCUUUUCAGUCCGAA	Cleavage	LOC_Os09g31090	-	-	AT4G12570	UBIQUITIN PROTEIN LIGASE 5 (UPL5)	Knock-out mutants showed accelerated senescence of leaves. The mRNA is cell-to-cell mobile.	Zm00001eb101780	-	E3 ubiquitin-protein ligase UPL5	37.1728	34.8166	21.1246	15.6121	5.2628	Protein homeostasis	-	-0.627621
sbi-miR159.2	Sobic.004G079800	5	-1	2422	2442	UUUGGAUUGAAGGGAGCUCUG	:::::.::::::.::: ::	CAGAGUUCCCUUUAAUACAUG	Cleavage	LOC_Os02g10260	-	-	AT5G19620	OUTER ENVELOPE PROTEIN OF 80 KDA (OEP80)	AtOEP80 is paralog to the chloroplastic protein translocation channel Toc75. Mutations in this locus result in embryo lethality.	Zm00001eb236320	-	Outer envelope protein 80	20.3123	29.022	15.9881	4.92045	3.35941	Protein translocation	-	-0.591832
sbi-miR159.2	Sobic.006G169700	2	-1	163	183	UUUGGAUUGAAGGGAGCUCUG	..::::::: :::.:::::::	UGGAGCUCCAUUCGAUCCAAA	Cleavage	LOC_Os04g46384	-	-	AT3G60460	DUO POLLEN 1 (DUO1)	Encodes an R2R3 myb transcription factor that is required for male gamete formation, specifically for entry of the generative cell into mitosis. Specifically expressed in the male germline.	Zm00001eb074810	-	Transcription factor GAMYB	0.277235	0.119393	0.100693	0.0171971	0	Plant reproduction;RNA biosynthesis	MYB	-0.579452
sbi-miR159.2	Sobic.009G177000	3	-1	798	818	UUUGGAUUGAAGGGAGCUCUG	:.:::: .::::::::.::..	CGGAGCCUCCUUCAAUUCAGG	Cleavage	LOC_Os05g40700	-	-	AT4G10360	-	TRAM, LAG1 and CLN8 (TLC) lipid-sensing domain containing protein.	-	-	-	0.100283	1.01844	0.0694588	0.0854211	0	-	-	-0.556949
sbi-miR159.2	Sobic.004G310500	3.5	-1	965	985	UUUGGAUUGAAGGGAGCUCUG	::::::..::::::::. :.	AAGAGCUUUCUUCAAUCUUAG	Cleavage	LOC_Os02g52880	-	-	AT1G44835	-	YbaK/aminoacyl-tRNA synthetase-associated domain-containing protein.	Zm00001eb193560	-	Prolyl-tRNA synthetase associated domain-containing protein 1	12.2858	19.0558	10.0056	5.11655	1.75549	-	-	-0.556472
sbi-miR159.2	Sobic.002G021900	2.5	-1	789	809	UUUGGAUUGAAGGGAGCUCUG	:: ::..::::::::::.:	UCGAUCUUUCUUCAAUCCAGA	Cleavage	LOC_Os09g29560	-	-	AT1G21250;AT3G25490;AT1G21270;AT1G21210;AT1G21230;AT1G21240	CELL WALL-ASSOCIATED KINASE 1 (WAK1)#(AT1G21250);-;WALL-ASSOCIATED KINASE 2 (WAK2)#(AT1G21270);WALL ASSOCIATED KINASE 4 (WAK4)#(AT1G21210);WALL ASSOCIATED KINASE 5 (WAK5)#(AT1G21230);WALL ASSOCIATED KINASE 3 (WAK3)#(AT1G21240)	Encodes a cell wall-associated kinase that interacts with AtGRP3 and may function as a signaling receptor of extracellular matrix component such as oligogalacturonides. The mRNA is cell-to-cell mobile.#(AT1G21250);Protein kinase family protein.#(AT3G25490);cytoplasmic serine/threonine protein kinase induced by salicylic acid. mutant plants exhibit a loss of cell expansion and dependence on sugars…	-	-	-	0.146728	7.08644	0.365281	0.0880824	0	Enzyme classification;Protein modification	-	-0.533388
sbi-miR159.2	Sobic.001G014300	3.5	-1	772	792	UUUGGAUUGAAGGGAGCUCUG	.:::::::..::..::.:.:.	UAGAGCUCUUUUUGAUUCGAG	Cleavage	LOC_Os03g40410;LOC_Os03g40370	-;-	-;-	AT4G22060;AT4G22165;AT5G66830;AT4G22170;AT4G22180;AT1G10110	F-BOX/DUF295 BRASSICEAE-SPECIFIC 29 (ATFDB29)#(AT4G22060);F-BOX/DUF295 BRASSICEAE-SPECIFIC 30 (ATFDB30)#(AT4G22165);F-BOX/DUF295 BRASSICEAE-SPECIFIC 38 (ATFDB38)#(AT5G66830);F-BOX/DUF295 BRASSICEAE-SPECIFIC 31 (ATFDB31)#(AT4G22170);F-BOX/DUF295 BRASSICEAE-SPECIFIC 32 (ATFDB32)#(AT4G22180);F-BOX/DUF295 BRASSICEAE-SPECIFIC 1 (ATFDB1)#(AT1G10110)	F-box protein (DUF295).#(AT4G22060);F-box protein (DUF295).#(AT4G22165);F-box protein (DUF295).#(AT5G66830);F-box protein (DUF295).#(AT4G22170);F-box protein (DUF295).#(AT4G22180);F-box family protein.#(AT1G10110)	-	-	-	27.8226	19.262	21.1264	15.4053	9.66904	-	-	-0.336912
sbi-miR159.2	Sobic.006G061100	4	-1	62	82	UUUGGAUUGAAGGGAGCUCUG	:::::: ::::::: :::::	CAGAGCCCCCUUCACACCAAA	Cleavage	LOC_Os04g32880	-	-	-	-	-	Zm00001eb084670	LOC100279316	Sucrose nonfermenting 4-like protein	28.1209	36.9162	32.0128	18.5351	4.36034	Multi-process regulation;Protein modification	-	-0.21688
sbi-miR159.2	Sobic.003G331100	2	-1	1280	1300	UUUGGAUUGAAGGGAGCUCUG	..:::::::::::: :::::.	UGGAGCUCCCUUCACUCCAAG	Cleavage	LOC_Os01g59660;LOC_Os01g59660;LOC_Os01g59660;LOC_Os01g59660;LOC_Os01g59660;LOC_Os01g59660;LOC_Os01g59660;LOC_Os01g59660;LOC_Os01g59660;LOC_Os01g59660;LOC_Os01g59660;LOC_Os01g59660;LOC_Os01g59660;LOC_Os01g59660;LOC_Os01g59660;LOC_Os01g59660;LOC_Os01g59660;LOC_Os01g59660;LOC_Os01g59660;LOC_Os01g59660;LOC_Os01g59660;LOC_Os01g59660;LOC_Os01g59660;LOC_Os01g59660;LOC_Os01g59660;LOC_Os01g59660;LOC_Os01g…	OsMYBGA|OsGAMYB#(LOC_Os01g59660);OsMYBGA|OsGAMYB#(LOC_Os01g59660);OsMYBGA|OsGAMYB#(LOC_Os01g59660);OsMYBGA|OsGAMYB#(LOC_Os01g59660);OsMYBGA|OsGAMYB#(LOC_Os01g59660);OsMYBGA|OsGAMYB#(LOC_Os01g59660);OsMYBGA|OsGAMYB#(LOC_Os01g59660);OsMYBGA|OsGAMYB#(LOC_Os01g59660);OsMYBGA|OsGAMYB#(LOC_Os01g59660);OsMYBGA|OsGAMYB#(LOC_Os01g59660);OsMYBGA|OsGAMYB#(LOC_Os01g59660);OsMYBGA|OsGAMYB#(LOC_Os01g59660);OsM…	Mutation of the two W boxes prevents the binding of OsWRKY71 to the mutated promoter, and releases the suppression of the OsGAMYB-activated Amy32b expression by OsWRKY71, suggesting that OsWRKY71 blocks GA signaling by functionally interfering with OsGAMYB.#(GA#(OsMYBGA|OsGAMYB#(LOC_Os01g59660)));High-level OsGAMYB expression was detected in the aleurone cells, inflorescence shoot apical region, …	AT3G11440;AT5G06100	MYB DOMAIN PROTEIN 65 (MYB65)#(AT3G11440);MYB DOMAIN PROTEIN 33 (MYB33)#(AT5G06100)	Member of the R2R3-MYB gene family. Similar to GA-induced Barley myb gene. May be induced during germination in response to GA. Double mutants with MYB33 are male sterile, showing defects in pollen development and anther development. Contains a binding site for miRNA159 and may be spatially regulated by this micro RNA. A highly conserved RNA secondary structure abuts the miR159 binding site which…	Zm00001eb150140	-	Transcription factor	28.6592	46.1665	31.975	32.3185	9.92866	Phytohormone action.gibberellin;RNA biosynthesis	MYB	-0.20266
sbi-miR159.2	Sobic.001G075300	3.5	-1	1322	1342	UUUGGAUUGAAGGGAGCUCUG	::::.:.:.::::::. :::	GAGAGUUUCUUUCAAUUAAAA	Cleavage	LOC_Os03g56090;LOC_Os03g56090	OsMYB36c#(LOC_Os03g56090);OsMYB36c#(LOC_Os03g56090)	Three OsMYB36 members redundantly regulate Casparian strip formation at the root endodermis.#(Casparian strip#(OsMYB36c#(LOC_Os03g56090)));Three OsMYB36 members redundantly regulate Casparian strip formation at the root endodermis.#(root endodermis#(OsMYB36c#(LOC_Os03g56090)))	-	-	-	Zm00001eb058880	-	Myb domain protein 68	0.017174	0.712522	0.320201	0.529901	0.332518	RNA biosynthesis	MYB	0.0664526
sbi-miR159.2	Sobic.003G400400	4	-1	799	819	UUUGGAUUGAAGGGAGCUCUG	:::::::..::::.: .::.:	CAGAGCUUUCUUCGAAUCAGA	Cleavage	LOC_Os01g68660	-	-	AT2G31980	PHYTOCYSTATIN 2 (CYS2)	Cystatins are inhibitors of cysteine proteinases.	Zm00001eb364860	-	Cysteine proteinase inhibitor	0.870788	0.421945	1128.91	828.295	4052.1	Protein homeostasis	-	0.300732
sbi-miR159.2	Sobic.007G085100	3	-1	630	650	UUUGGAUUGAAGGGAGCUCUG	:::::...:::::::...:	ACGAGCUUUUUUCAAUCUGGA	Cleavage	-	-	-	-	-	-	-	-	-	0.0319203	0	0.0514798	0.0151731	0	-	-	0.483205
sbi-miR159.2	Sobic.001G183100	2.5	-1	1208	1228	UUUGGAUUGAAGGGAGCUCUG	..::::::::::::: ::::	UGGAGCUCCCUUCAAACCAAU	Cleavage	LOC_Os03g38210;LOC_Os03g38210;LOC_Os03g38210;LOC_Os03g38210;LOC_Os03g38210;LOC_Os03g38210;LOC_Os03g38210	OsGAMYBL2#(LOC_Os03g38210);OsGAMYBL2#(LOC_Os03g38210);OsGAMYBL2#(LOC_Os03g38210);OsGAMYBL2#(LOC_Os03g38210);OsGAMYBL2#(LOC_Os03g38210);OsGAMYBL2#(LOC_Os03g38210);OsGAMYBL2#(LOC_Os03g38210)	Furthermore, OsGSK2, a key negative player in BR signaling, interacts with OsGAMYBL2 and prevents it from being degraded under 24-epibrassinolide treatment, whereas SLR1, a rice DELLA protein negatively regulating GA signaling, interacts with OsGAMYBL2 and prevents OsGAMYBL2 from binding to the target gene promoter.#(GA#(OsGAMYBL2#(LOC_Os03g38210)));GA signaling induces degradation of OsGAMYBL2 a…	-	-	-	Zm00001eb219740	-	Transcription factor GAMYB	3.46418	6.85775	24.2891	5.79444	2.39141	RNA biosynthesis	MYB	0.663883
sbi-miR159.2	Sobic.003G093200	3	-1	418	438	UUUGGAUUGAAGGGAGCUCUG	::::::::.:::::: ::::	CAGAGCUCUCUUCAAACCAAU	Cleavage	-	-	-	-	-	-	-	-	-	0.186865	0.0384503	1.75719	0.40113	0	-	-	0.758635
sbi-miR160.1	Sobic.008G136200	3.5	-1	3261	3281	GCGUGCAAGGAGCCAAGCAUG	::::::::.::: ::.::	CUGGCUUGGCUUCUUCCAUGC	Cleavage	LOC_Os12g38210;LOC_Os12g38210;LOC_Os12g38210;LOC_Os12g38210;LOC_Os12g38210;LOC_Os12g38210;LOC_Os12g38210;LOC_Os12g38210;LOC_Os12g38210;LOC_Os12g38210;LOC_Os12g38210;LOC_Os12g38210;LOC_Os12g38210;LOC_Os12g38210;LOC_Os12g38210;LOC_Os12g38210;LOC_Os12g38210;LOC_Os12g38210;LOC_Os12g38210;LOC_Os12g38210;LOC_Os12g38210;LOC_Os12g38210	SPL11#(LOC_Os12g38210);SPL11#(LOC_Os12g38210);SPL11#(LOC_Os12g38210);SPL11#(LOC_Os12g38210);SPL11#(LOC_Os12g38210);SPL11#(LOC_Os12g38210);SPL11#(LOC_Os12g38210);SPL11#(LOC_Os12g38210);SPL11#(LOC_Os12g38210);SPL11#(LOC_Os12g38210);SPL11#(LOC_Os12g38210);SPL11#(LOC_Os12g38210);SPL11#(LOC_Os12g38210);SPL11#(LOC_Os12g38210);SPL11#(LOC_Os12g38210);SPL11#(LOC_Os12g38210);SPL11#(LOC_Os12g38210);SPL11#(L…	Expression analysis indicated that Spl11 is induced in both incompatible and compatible rice-blast interactions.#(blast#(SPL11#(LOC_Os12g38210)));The rice (Oryza sativa) E3 ligase SPOTTED LEAF11 (SPL11) negatively regulates programmed cell death and disease resistance.#(disease#(SPL11#(LOC_Os12g38210)));The rice U-box/ARM E3 ubiquitin ligase SPL11 negatively regulates programmed cell death (PCD) …	-	-	-	Zm00001eb029250	-	RING-type E3 ubiquitin transferase	71.4639	48.9885	28.5392	25.5315	45.8196	Protein homeostasis	-	-0.594997
sbi-miR160.1	Sobic.001G442300	3.5	-1	2979	2999	GCGUGCAAGGAGCCAAGCAUG	: ::.::::.: ::::::.:.	CUUGUUUGGUUACUUGCAUGU	Translation	-	-	-	AT1G14700;AT1G25230;AT2G01890;AT3G17790	PURPLE ACID PHOSPHATASE 3 (PAP3)#(AT1G14700);-;PURPLE ACID PHOSPHATASE 8 (PAP8)#(AT2G01890);PURPLE ACID PHOSPHATASE 17 (PAP17)#(AT3G17790)	purple acid phosphatase 3.#(AT1G14700);Calcineurin-like metallo-phosphoesterase superfamily protein.#(AT1G25230);Encodes a purple acid phosphatase (PAP) belonging to the low molecular weight plant PAP group.#(AT2G01890);Expression is upregulated in the shoot of cax1/cax3 mutant and is responsive to phosphate (Pi) and not phosphite (Phi) in roots and shoots.#(AT3G17790)	Zm00001eb010130	-	Purple acid phosphatase	1.20541	0.653935	0.338391	0.392283	2.22002	-	-	-0.538975
sbi-miR160.1	Sobic.006G221000	3.5	-1	56	76	GCGUGCAAGGAGCCAAGCAUG	:.: :::::::::::::::	CGUCCUUGGCUCCUUGCACCU	Cleavage	LOC_Os04g53310	OsSSIIIb	Creating high-resistant starch rice by simultaneous editing of SS3a and SS3b.	AT1G11720	STARCH SYNTHASE 3 (SS3)	Encodes a starch synthase that in addition to its role in starch biosynthesis also has a negative regulatory function in the biosynthesis of transient starch. The protein apparently contains a starch-binding domain (SBD).	Zm00001eb431240	-	Starch synthase 3 chloroplastic/amyloplastic	65.9327	54.0355	6.21432	2.58538	12.6882	Carbohydrate metabolism	-	-0.527539
sbi-miR160.1	Sobic.008G188900	5	-1	1942	1962	GCGUGCAAGGAGCCAAGCAUG	:.::::::::::.::: .:	CGUGCUUGGCUCUUUGAGCAU	Cleavage	LOC_Os12g43950	-	-	AT2G16400;AT4G34610	BEL1-LIKE HOMEODOMAIN 7 (BLH7)#(AT2G16400);BEL1-LIKE HOMEODOMAIN 6 (BLH6)#(AT4G34610)	BEL1-like homeodomain 7.#(AT2G16400);Acts as a negative regulator of xylem vessel cells as a protein complex together with OVATE FAMILY PROTEIN1 (OFP1), OFP4, and MYB75.#(AT4G34610)	Zm00001eb032780	-	Benzothiadiazole-induced homeodomain protein 1	31.4375	37.638	5.75977	5.57941	2.78517	RNA biosynthesis	TALE	-0.452753
sbi-miR160.1	Sobic.007G164400	4	-1	657	677	GCGUGCAAGGAGCCAAGCAUG	:::::: ::: :::::: :::	CAUGCUGGGCGCCUUGCCCGC	Translation	LOC_Os08g45000;LOC_Os08g45000;LOC_Os08g45000;LOC_Os08g45000;LOC_Os08g45000;LOC_Os08g45000;LOC_Os08g45000;LOC_Os08g45000;LOC_Os08g45000;LOC_Os08g45000;LOC_Os08g45000;LOC_Os08g45000;LOC_Os08g45000;LOC_Os08g45000;LOC_Os08g45000;LOC_Os08g45000;LOC_Os08g45000;LOC_Os08g45000;LOC_Os08g45000;LOC_Os08g45000;LOC_Os08g45000;LOC_Os08g45000;LOC_Os08g45000;LOC_Os08g45000;LOC_Os08g45000;LOC_Os08g45000;LOC_Os08g…	OsLPT1|OsPht1;6|OsPT6#(LOC_Os08g45000);OsLPT1|OsPht1;6|OsPT6#(LOC_Os08g45000);OsLPT1|OsPht1;6|OsPT6#(LOC_Os08g45000);OsLPT1|OsPht1;6|OsPT6#(LOC_Os08g45000);OsLPT1|OsPht1;6|OsPT6#(LOC_Os08g45000);OsLPT1|OsPht1;6|OsPT6#(LOC_Os08g45000);OsLPT1|OsPht1;6|OsPT6#(LOC_Os08g45000);OsLPT1|OsPht1;6|OsPT6#(LOC_Os08g45000);OsLPT1|OsPht1;6|OsPT6#(LOC_Os08g45000);OsLPT1|OsPht1;6|OsPT6#(LOC_Os08g45000);OsLPT1|Os…	In transgenic rice, the knock-down of either OsPT2 or OsPT6 expression by RNA interference significantly decreased both the uptake and the long-distance transport of Pi from roots to shoots.#(shoot#(OsLPT1|OsPht1;6|OsPT6#(LOC_Os08g45000)));Moreover, expression of OsPT2, which encodes a low-affinity Pi transporter, was up-regulated in OsMYB2P-1-overexpressing plants under Pi-sufficient conditions,…	AT3G54700	PHOSPHATE TRANSPORTER 1;7 (PHT1;7)	Encodes Pht1;7, a member of the Pht1 family of phosphate transporters which include: Pht1;1/At5g43350, Pht1;2/At5g43370, Pht1;3/At5g43360, Pht1;4/At2g38940, Pht1;5/At2g32830, Pht1;6/At5g43340, Pht1;7/At3g54700, Pht1;8/At1g20860, Pht1;9/At1g76430 (Plant Journal 2002, 31:341).	Zm00001eb038730	-	H( )/Pi cotransporter	1.55242	1.6532	0.253992	0.209205	0	Nutrient uptake;Solute transport	-	-0.417544
sbi-miR160.1	Sobic.010G227950	3.5	-1	264	284	GCGUGCAAGGAGCCAAGCAUG	..::: ::::::: ::.:.::	UGUGCCUGGCUCCCUGUAUGC	Cleavage	-	-	-	-	-	-	-	-	-	0.430976	1.89566	0.095951	0.317721	0.113192	-	-	-0.399653
sbi-miR160.1	Sobic.005G167300	3	-1	481	501	GCGUGCAAGGAGCCAAGCAUG	::::::::.::::: :::	CCCGCUUGGCUUCUUGCUCGC	Cleavage	LOC_Os11g37520	-	-	-	-	-	Zm00001eb200590;Zm00001eb114430	-;-	BTB domain-containing protein.#(Zm00001eb200590);BTB domain-containing protein.#(Zm00001eb114430)	36.223	38.4213	14.0181	10.1967	7.8921	Phytohormone action.ethylene	-	-0.369021
sbi-miR160.1	Sobic.001G153800	3.5	-1	205	225	GCGUGCAAGGAGCCAAGCAUG	::: :: :.:::::::::::	CAUUGUUUGUUCCUUGCACGC	Cleavage	LOC_Os10g17650	-	-	AT1G26560	BETA GLUCOSIDASE 40 (BGLU40)	beta glucosidase 40.	-	-	-	0.565906	0.0571511	0	0.0339243	0	Enzyme classification	-	-0.353976
sbi-miR160.1	Sobic.004G263100	4.5	-1	773	793	GCGUGCAAGGAGCCAAGCAUG	::::::::::: ::::..:.	CAUGCUUGGCUAGUUGCGUGU	Translation	LOC_Os02g48140	-	-	-	-	-	Zm00001eb252460	-	17.4 kDa class I heat shock protein 3	1.20726	0.746267	0.614611	11.0937	36.4518	-	-	-0.343824
sbi-miR160.1	Sobic.002G045200	4	-1	3709	3729	GCGUGCAAGGAGCCAAGCAUG	:: .:::::::.:::::::	CACAUUUGGCUCUUUGCACGG	Cleavage	LOC_Os07g07230	-	-	AT3G03770	-	Leucine-rich repeat protein kinase family protein.	Zm00001eb300880	-	Putative inactive leucine-rich repeat receptor-like protein kinase	37.959	96.8882	10.6145	0.889556	0.509681	Enzyme classification;Protein modification	-	-0.34226
sbi-miR160.1	Sobic.003G265600	4.5	-1	1989	2010	GCGUGCAAGGAGCCA-AGCAUG	:::: : :::::::::::.::	CAUGAUAUGGCUCCUUGCGCGA	Cleavage	-	-	-	-	-	-	-	-	-	0.0759991	0.845223	0.0615164	0.0698049	0.0883907	-	-	-0.32866
sbi-miR160.1	Sobic.002G275600	4	-1	4027	4047	GCGUGCAAGGAGCCAAGCAUG	:::::::::::::::	AAGAGUUGGCUCCUUGCACGG	Cleavage	LOC_Os11g36390	-	-	AT5G22010	REPLICATION FACTOR C1 (RFC1)	Encodes RFC1, the largest subunit of replication factor C. Mediates genomic stability and transcriptional gene silencing.	Zm00001eb114240	-	Replication factor C subunit 1	27.0533	28.8408	9.51823	6.66404	2.43269	Cell division	-	-0.328629
sbi-miR160.1	Sobic.007G056200	3.5	-1	1923	1943	GCGUGCAAGGAGCCAAGCAUG	..:::::: :::::: ::.::	UGUGCUUGCCUCCUUUCAUGC	Cleavage	LOC_Os08g07290	-	-	AT3G55160	THYROID ADENOMA ASSOCIATED (THADA)	THADA is an orphan gene in Arabidopsis thaliana. It is the only DUF2428 domain containing protein in the genome.	Zm00001eb414960	-	thyroid adenoma-associated protein homolog	32.2146	43.7075	12.079	4.86888	1.33919	RNA processing	-	-0.296143
sbi-miR160.1	Sobic.010G203300	3.5	-1	1012	1032	GCGUGCAAGGAGCCAAGCAUG	.::: ::::.:..:::::.:.	UAUGGUUGGUUUUUUGCAUGU	Cleavage	LOC_Os06g43280	-	-	AT3G11220	ELONGATA 1 (ELO1)	A subunit of Elongator, a histone acetyl transferase complex, consisting of six subunits (ELP1?ELP6), that copurifies with the elongating RNAPII in yeast and humans. Three Arabidopsis thaliana genes, encoding homologs of the yeast Elongator subunits ELP1, ELP3 (histone acetyl transferase), and ELP4 are responsible for the narrow leaf phenotype in elongata mutants and for reduced root growth that …	Zm00001eb387250	-	Elongator complex protein 4	29.7586	22.1118	22.054	19.0596	23.1449	RNA biosynthesis	-	-0.286043
sbi-miR160.1	Sobic.001G327900	4	-1	410	429	GCGUGCAAGGAGCCAAGCAUG	:::: ::::::::: ::.:::	CAUG-UUGGCUCCUGGCGCGC	Cleavage	-	-	-	AT4G37650	SHORT ROOT (SHR)	Involved in radial organization of the root and shoot axial organs. Essential for normal shoot gravitropism. The protein moves in a highly specific manner from the cells of the stele in which it is synthesized outward. Movement requires sequences within the GRAS and VHIID domains. SHORT-ROOT forms a network in combination with JACKDAW, BLUEJAY AND SCARECROW to regulate tissue patterning through a…	Zm00001eb020850	-	GRAS domain-containing protein	2.05913	0.667424	0.421732	0.168463	0.192481	External stimuli response;RNA biosynthesis	GRAS	-0.280081
sbi-miR160.1	Sobic.006G172200	3.5	-1	9	29	GCGUGCAAGGAGCCAAGCAUG	.:::::::.::::.:::	CUCUUUUGGCUCUUUGCGCGC	Cleavage	LOC_Os04g46750	-	-	AT4G16600;AT2G35710	PLANT GLYCOGENIN-LIKE STARCH INITIATION PROTEIN 8 (PGSIP8)#(AT4G16600);PLANT GLYCOGENIN-LIKE STARCH INITIATION PROTEIN 7 (PGSIP7)#(AT2G35710)	Nucleotide-diphospho-sugar transferases superfamily protein.#(AT4G16600);Nucleotide-diphospho-sugar transferases superfamily protein.#(AT2G35710)	Zm00001eb429610;Zm00001eb074520	-;-	Putative glucuronosyltransferase PGSIP7.#(Zm00001eb429610);Putative glucuronosyltransferase PGSIP7.#(Zm00001eb074520)	31.0324	41.979	15.1064	8.79953	3.59379	-	-	-0.257479
sbi-miR160.1	Sobic.002G217500	4.5	-1	423	443	GCGUGCAAGGAGCCAAGCAUG	:: :.:::::::: ::: :::	CAAGUUUGGCUCCAUGCUCGC	Cleavage	-	-	-	AT3G01340;AT2G30050	-;-	Transducin/WD40 repeat-like superfamily protein.#(AT3G01340);transducin family protein / WD-40 repeat family protein.#(AT2G30050)	-	-	-	66.7909	53.5435	24.9931	13.3283	4.32767	Vesicle trafficking	-	-0.243894
sbi-miR160.1	Sobic.004G296100	4.5	-1	1334	1354	GCGUGCAAGGAGCCAAGCAUG	::::: ::: ::: ::::.::	CAUGCAUGGAUCCAUGCAUGC	Cleavage	LOC_Os02g43900	-	-	-	-	-	Zm00001eb249400	-	-	2.50709	0.873029	1.11903	1.40127	0.868079	-	-	-0.190945
sbi-miR160.1	Sobic.001G243400	2.5	-1	889	909	GCGUGCAAGGAGCCAAGCAUG	..:::::::::.::::...:.	UGUGCUUGGCUUCUUGUGUGU	Cleavage	-	-	-	-	-	-	-	-	-	0	0	0	0.0679668	0	-	-	-0.0615554
sbi-miR160.1	Sobic.001G543900	5	-1	2510	2530	GCGUGCAAGGAGCCAAGCAUG	..:::::::::..:::: :	UGUGCUUGGCUUUUUGCUCUU	Cleavage	LOC_Os03g01120;LOC_Os03g01120;LOC_Os03g01120;LOC_Os03g01120;LOC_Os03g01120;LOC_Os03g01120;LOC_Os03g01120;LOC_Os03g01120;LOC_Os03g01120;LOC_Os03g01120;LOC_Os03g01120;LOC_Os03g01120;LOC_Os03g01120	OsA8#(LOC_Os03g01120);OsA8#(LOC_Os03g01120);OsA8#(LOC_Os03g01120);OsA8#(LOC_Os03g01120);OsA8#(LOC_Os03g01120);OsA8#(LOC_Os03g01120);OsA8#(LOC_Os03g01120);OsA8#(LOC_Os03g01120);OsA8#(LOC_Os03g01120);OsA8#(LOC_Os03g01120);OsA8#(LOC_Os03g01120);OsA8#(LOC_Os03g01120);OsA8#(LOC_Os03g01120)	It is reported here that OsA8, a typical PM H(+)-ATPases gene that was predominantly expressed in roots of rice, is down-regulated by nutrient deficiency.#(root#(OsA8#(LOC_Os03g01120)));The Osa8 mutant had a relatively smaller size and root to shoot biomass ratio, but higher ATPase activity than its wild-type counterparts under phosphorus (P) starvation conditions.#(root#(OsA8#(LOC_Os03g01120)));…	-	-	-	Zm00001eb000210	-	Plasma membrane ATPase	28.929	53.7292	29.1839	22.0986	11.0634	Solute transport	-	-0.0415933
sbi-miR160.1	Sobic.003G153100	3.5	-1	10	30	GCGUGCAAGGAGCCAAGCAUG	::: ::::::::::::: ::	CAUCAUUGGCUCCUUGCAGGC	Cleavage	LOC_Os01g22590	-	-	AT1G48100	POLYGALACTURONASE INVOLVED IN EXPANSION3 (PGX3)	Pectin lyase-like superfamily protein.	Zm00001eb340640	LOC103635108	Polygalacturonase	0.224125	1.73631	0.638026	0.261989	0.142668	Cell wall organisation;Enzyme classification	-	-0.023503
sbi-miR160.1	Sobic.009G090800	2.5	-1	17706	17726	GCGUGCAAGGAGCCAAGCAUG	.:: :::::::::::..::.	GGUGGUUGGCUCCUUGUGCGU	Cleavage	-	-	-	-	-	-	Zm00001eb351090	-	CRAL-TRIO domain-containing protein	5.58698	6.90933	23.364	23.7085	57.929	-	-	-0.00261586
sbi-miR160.1	Sobic.001G243500	3	-1	887	907	GCGUGCAAGGAGCCAAGCAUG	..:::::::::..:::...:.	UGUGCUUGGCUUUUUGUGUGU	Cleavage	-	-	-	-	-	-	-	-	-	0.0318899	0.059558	1.44154	15.5794	0.179087	-	-	0.0245472
sbi-miR160.1	Sobic.007G142100	3	-1	2194	2214	GCGUGCAAGGAGCCAAGCAUG	::.::::.: ::::::.::	UCUGUUUGGUUACUUGCAUGC	Translation	-	-	-	-	-	-	Zm00001eb041100	-	Putrescine hydroxycinnamoyltransferase 1	18.1352	17.4161	16.9157	7.39255	4.28773	Enzyme classification	-	0.27102
sbi-miR160.1	Sobic.001G218800	4.5	-1	2579	2599	GCGUGCAAGGAGCCAAGCAUG	::::.:: :. ::::::..::	CAUGUUUUGUGCCUUGCGUGC	Translation	LOC_Os10g33820	-	-	AT2G37035	-	transmembrane protein.	Zm00001eb221710	-	-	15.8195	13.7292	18.87	14.845	19.9776	-	-	0.4057
sbi-miR160.1	Sobic.010G019900	4	-1	1263	1283	GCGUGCAAGGAGCCAAGCAUG	..:::::: ::..::::: ::	UGUGCUUGCCUUUUUGCAAGC	Cleavage	LOC_Os04g26910	-	-	AT1G60680;AT1G60690;AT1G60710;AT1G60730	-;-; (ATB2)#(AT1G60710);-	NAD(P)-linked oxidoreductase superfamily protein.#(AT1G60680);NAD(P)-linked oxidoreductase superfamily protein.#(AT1G60690);Encodes ATB2.#(AT1G60710);NAD(P)-linked oxidoreductase superfamily protein.#(AT1G60730)	Zm00001eb269560	-	probable aldo-keto reductase 2 isoform X2	37.3184	36.3105	39.9919	24.8543	9.80122	Enzyme classification	-	0.433681
sbi-miR160.1	Sobic.004G244100	4	-1	801	821	GCGUGCAAGGAGCCAAGCAUG	:. :::::::::::::: : :	CGAGCUUGGCUCCUUGCCCCC	Cleavage	LOC_Os02g50600	-	-	AT1G24170;AT1G70090;AT3G28340	(LGT9)#(AT1G24170);GLUCOSYL TRANSFERASE FAMILY 8 (LGT8)#(AT1G70090);GALACTURONOSYLTRANSFERASE-LIKE 10 (GATL10)#(AT3G28340)	Encodes a protein with putative galacturonosyltransferase activity.#(AT1G24170);Encodes a protein with putative galacturonosyltransferase activity.#(AT1G70090);Encodes a protein with putative galacturonosyltransferase activity.#(AT3G28340)	Zm00001eb254050	-	Hexosyltransferase	47.4737	79.0719	91.117	9.44783	12.5768	Cell wall organisation	-	0.553904
sbi-miR160.1	Sobic.006G026900	4.5	-1	1465	1485	GCGUGCAAGGAGCCAAGCAUG	:.::.::: ::.: ::.::::	CGUGUUUGCCUUCGUGUACGC	Cleavage	LOC_Os04g10800	-	-	-	-	-	Zm00001eb087730;Zm00001eb087740	-;-	H( )/Pi cotransporter.#(Zm00001eb087730);H( )/Pi cotransporter.#(Zm00001eb087740)	0.0414453	0.0162485	0.345639	0.458791	0.172979	Nutrient uptake;Solute transport	-	0.55961
sbi-miR160.1	Sobic.010G205000	3	-1	263	283	GCGUGCAAGGAGCCAAGCAUG	:::::::.: :::::..::	GUUGCUUGGUUGCUUGCGUGC	Translation	LOC_Os06g43620	-	-	AT5G20270	HEPTAHELICAL TRANSMEMBRANE PROTEIN1 (HHP1)	heptahelical transmembrane protein homologous to human adiponectin receptors and progestin receptors.	-	-	-	6.1911	12.7106	15.4584	11.2786	0.164944	-	-	0.638057
sbi-miR160.1	Sobic.009G022600	3	-1	986	1006	GCGUGCAAGGAGCCAAGCAUG	: : :::::::::::: :.::	CCUCCUUGGCUCCUUGGAUGC	Cleavage	-	-	-	-	-	-	-	-	-	0	0.455035	12.2044	15.289	0	-	-	0.647621
sbi-miR160.1	Sobic.003G159500	3	-1	1157	1177	GCGUGCAAGGAGCCAAGCAUG	::::::::::::: : :::	AUUGCUUGGCUCCUUACCCGC	Cleavage	-	-	-	AT2G47700	RED AND FAR-RED INSENSITIVE 2 (RFI2)	RING/U-box superfamily protein.	Zm00001eb131520	-	RING/U-box superfamily protein	16.4662	18.9139	42.3196	29.2616	7.47716	Protein homeostasis	-	0.891231
sbi-miR160.1	Sobic.003G134700	5	-1	1528	1548	GCGUGCAAGGAGCCAAGCAUG	.::::::::.: ::::::.	UAUGCUUGGUUACUUGCAUAU	Translation	-	-	-	-	-	-	-	-	-	0.0624217	0.10421	2.78351	1.00672	0.117712	Chromatin organisation	-	0.988103
sbi-miR160.2	Sobic.009G159500	3.5	-1	501	521	UGCCUGGCUCCCUGUAUGCCA	:::::.. ::::::::::	AUGCAUAUGUGGAGCCAGGCU	Cleavage	-	-	-	-	-	-	-	-	-	0	0.0918569	0.174884	0	0	Cell division	-	-0.506374
sbi-miR160.2	Sobic.010G233800	4.5	-1	445	465	UGCCUGGCUCCCUGUAUGCCA	::::.:.:.::::: :: :::	UGGCGUGCGGGGAGACACGCA	Cleavage	LOC_Os06g46930	-	-	AT5G54600	PLASTID RIBOSOMAL PROTEIN L24 (RPL24)	Translation protein SH3-like family protein.	Zm00001eb225380	-	KOW domain-containing protein	27.6703	35.2936	60.1581	24.0379	3.72425	Protein biosynthesis	-	-0.464175
sbi-miR160.2	Sobic.002G165140	3.5	-1	12	32	UGCCUGGCUCCCUGUAUGCCA	:::: .:::: ::.::::::	AGGCAGGCAGGCAGUCAGGCA	Translation	LOC_Os09g13870	-	-	AT1G15080	LIPID PHOSPHATE PHOSPHATASE 2 (LPP2)	Encodes phosphatidic acid phosphatase. Involved in ABA signaling. Functions as a negative regulator upstream of ABI4. Expressed during germination and seed development. Expressed overall in young seedlings, in roots, hypocotyls, and vascular cells of cotyledons and leaves of 10 day-old seedlings, in flower filaments and stem elongation zones. Not expressed in anthers, pollen nor petals.	Zm00001eb097940	-	Lipid phosphate phosphatase 2	23.4079	30.6774	17.9944	23.1634	1.50079	Enzyme classification;Lipid metabolism	-	-0.0639974
sbi-miR160.2	Sobic.006G149600	0	-1	1467	1487	UGCCUGGCUCCCUGUAUGCCA	::::::::::::::::::::	AGGCAUACAGGGAGCCAGGCA	Cleavage	-	-	-	-	-	-	-	-	-	2.29014	7.45704	3.55391	0.795299	0.889772	Phytohormone action.jasmonic acid;RNA biosynthesis	ARF	0.0327732
sbi-miR160.2	Sobic.001G217300	0	-1	1837	1857	UGCCUGGCUCCCUGUAUGCCA	::::::::::::::::::::	AGGCAUACAGGGAGCCAGGCA	Cleavage	LOC_Os10g33940;LOC_Os10g33940	OsARF22#(LOC_Os10g33940);OsARF22#(LOC_Os10g33940)	Meanwhile, the transcriptional repressors OsARF18 and OsARF22 were upregulated in the callus of hda710.#(callus#(OsARF22#(LOC_Os10g33940)));The ChIP-qPCR analysis demonstrated that the callus of hda710 exhibited enhanced histone H3 acetylation levels at the chromatin regions of OsARF18 and OsARF22.#(callus#(OsARF22#(LOC_Os10g33940)))	AT4G30080	AUXIN RESPONSE FACTOR 16 (ARF16)	Involved in root cap cell differentiation. Gene expression is regulated by mir160.Located in the nucleus.	Zm00001eb045640	-	Auxin response factor	108.805	219.352	96.8272	36.8696	4.01058	Phytohormone action.jasmonic acid;RNA biosynthesis	ARF	0.158587
sbi-miR160.2	Sobic.001G486100	4.5	-1	1384	1404	UGCCUGGCUCCCUGUAUGCCA	::::: .:::: :::::: ::	UGGCAGGCAGGCAGCCAGACA	Translation	LOC_Os03g07870	-	-	AT3G52105	-	DIS3-exonuclease-like protein.	Zm00001eb402020	-	RING/FYVE/PHD zinc finger superfamily protein	10.0934	3.93538	18.7687	15.4736	124.415	-	-	0.17234
sbi-miR160.2	Sobic.010G227950	4	-1	327	347	UGCCUGGCUCCCUGUAUGCCA	::::.:.:: ::::::: :::	UGGCGUGCAAGGAGCCAAGCA	Cleavage	-	-	-	-	-	-	-	-	-	0.430976	1.89566	0.095951	0.317721	0.113192	-	-	0.173672
sbi-miR160.2	Sobic.005G181200	3.5	-1	1088	1108	UGCCUGGCUCCCUGUAUGCCA	:::::.::::::.:: ::	ACACAUACGGGGAGCUAGCCA	Cleavage	-	-	-	-	-	-	-	-	-	0.0116205	0.0447247	0	0.00552372	0	Enzyme classification;Protein modification	-	0.231614
sbi-miR160.2	Sobic.004G245850	4	-1	108	128	UGCCUGGCUCCCUGUAUGCCA	:::.:.:::: ::::: :::	AGGCGUGCAGGCAGCCAAGCA	Translation	-	-	-	-	-	-	-	-	-	10.1422	16.2105	6.71329	3.6047	0	-	-	0.249785
sbi-miR160.2	Sobic.006G069100	3	-1	485	505	UGCCUGGCUCCCUGUAUGCCA	:::.:.:::::.:: :::::	AGGCGUGCAGGGGGCGAGGCA	Cleavage	LOC_Os12g36620;LOC_Os12g36620;LOC_Os12g36620;LOC_Os12g36620;LOC_Os12g36620;LOC_Os12g36620;LOC_Os12g36620;LOC_Os12g36620;LOC_Os12g36620;LOC_Os12g36620;LOC_Os12g36620;LOC_Os12g36620;LOC_Os12g36620;LOC_Os12g36620;LOC_Os12g36620;LOC_Os12g36620;LOC_Os12g36620;LOC_Os12g36620;LOC_Os12g36620;LOC_Os12g36620	PPS1#(LOC_Os12g36620);PPS1#(LOC_Os12g36620);PPS1#(LOC_Os12g36620);PPS1#(LOC_Os12g36620);PPS1#(LOC_Os12g36620);PPS1#(LOC_Os12g36620);PPS1#(LOC_Os12g36620);PPS1#(LOC_Os12g36620);PPS1#(LOC_Os12g36620);PPS1#(LOC_Os12g36620);PPS1#(LOC_Os12g36620);PPS1#(LOC_Os12g36620);PPS1#(LOC_Os12g36620);PPS1#(LOC_Os12g36620);PPS1#(LOC_Os12g36620);PPS1#(LOC_Os12g36620);PPS1#(LOC_Os12g36620);PPS1#(LOC_Os12g36620);PPS…	Both pps1 RNAi and heterozygous plants are characterized by delayed development and partial pollen sterility at vegetative stages and reproductive stage.#(pollen#(PPS1#(LOC_Os12g36620)));Both pps1 RNAi and heterozygous plants are characterized by delayed development and partial pollen sterility at vegetative stages and reproductive stage.#(sterility#(PPS1#(LOC_Os12g36620)));Both pps1 RNAi and het…	AT4G13650	-	Pentatricopeptide repeat (PPR) superfamily protein.	Zm00001eb083880	-	Pentatricopeptide repeat-containing protein	3.06542	4.96681	2.30433	0.673374	0.177485	-	-	0.271855
sbi-miR160.2	Sobic.002G133700	3.5	-1	8220	8240	UGCCUGGCUCCCUGUAUGCCA	.:::::::::: :.::::	UUUUAUACAGGGAGGCGGGCA	Cleavage	-	-	-	-	-	-	-	-	-	0.00878449	0.0314514	0	0	0	-	-	0.307766
sbi-miR160.2	Sobic.010G236300	0	-1	1386	1406	UGCCUGGCUCCCUGUAUGCCA	::::::::::::::::::::	AGGCAUACAGGGAGCCAGGCA	Cleavage	LOC_Os06g47150;LOC_Os06g47150;LOC_Os06g47150;LOC_Os06g47150;LOC_Os06g47150;LOC_Os06g47150;LOC_Os06g47150;LOC_Os06g47150;LOC_Os06g47150;LOC_Os06g47150;LOC_Os06g47150;LOC_Os06g47150;LOC_Os06g47150;LOC_Os06g47150;LOC_Os06g47150	OsARF18|RST1#(LOC_Os06g47150);OsARF18|RST1#(LOC_Os06g47150);OsARF18|RST1#(LOC_Os06g47150);OsARF18|RST1#(LOC_Os06g47150);OsARF18|RST1#(LOC_Os06g47150);OsARF18|RST1#(LOC_Os06g47150);OsARF18|RST1#(LOC_Os06g47150);OsARF18|RST1#(LOC_Os06g47150);OsARF18|RST1#(LOC_Os06g47150);OsARF18|RST1#(LOC_Os06g47150);OsARF18|RST1#(LOC_Os06g47150);OsARF18|RST1#(LOC_Os06g47150);OsARF18|RST1#(LOC_Os06g47150);OsARF18|R…	Meanwhile, the transcriptional repressors OsARF18 and OsARF22 were upregulated in the callus of hda710.#(callus#(OsARF18|RST1#(LOC_Os06g47150))); The ChIP-qPCR analysis demonstrated that the callus of hda710 exhibited enhanced histone H3 acetylation levels at the chromatin regions of OsARF18 and OsARF22.#(callus#(OsARF18|RST1#(LOC_Os06g47150))); Additionally, overexpression of OsARF18 decreased t…	AT4G30080	AUXIN RESPONSE FACTOR 16 (ARF16)	Involved in root cap cell differentiation. Gene expression is regulated by mir160.Located in the nucleus.	Zm00001eb225570	-	Auxin response factor	39.6701	63.287	14.0603	8.06016	4.90215	Phytohormone action.jasmonic acid;RNA biosynthesis	ARF	0.444411
sbi-miR160.2	Sobic.004G221400	1	-1	1459	1479	UGCCUGGCUCCCUGUAUGCCA	: ::::::::::::::::::	AGCCAUACAGGGAGCCAGGCA	Cleavage	LOC_Os02g41800;LOC_Os02g41800;LOC_Os02g41800;LOC_Os02g41800;LOC_Os02g41800;LOC_Os02g41800;LOC_Os02g41800;LOC_Os02g41800;LOC_Os02g41800;LOC_Os02g41800;LOC_Os02g41800;LOC_Os02g41800;LOC_Os02g41800;LOC_Os02g41800;LOC_Os02g41800	ARF8#(LOC_Os02g41800);ARF8#(LOC_Os02g41800);ARF8#(LOC_Os02g41800);ARF8#(LOC_Os02g41800);ARF8#(LOC_Os02g41800);ARF8#(LOC_Os02g41800);ARF8#(LOC_Os02g41800);ARF8#(LOC_Os02g41800);ARF8#(LOC_Os02g41800);ARF8#(LOC_Os02g41800);ARF8#(LOC_Os02g41800);ARF8#(LOC_Os02g41800);ARF8#(LOC_Os02g41800);ARF8#(LOC_Os02g41800);ARF8#(LOC_Os02g41800)	It was also shown that expression of OsGH3-2, an rice IAA-conjugating enzyme, was positively regulated by ARF8.#(IAA#(ARF8#(LOC_Os02g41800)));MicroRNA167 (miR167) was shown to cleave auxin responsive factor 8 (ARF8) mRNA in cultured rice cells.#(auxin#(ARF8#(LOC_Os02g41800)));When cells grew in auxin-free medium, miR167 level decreased, resulting in an increase in the level of ARF8 mRNA.#(auxin#(…	-	-	-	Zm00001eb247720	-	Auxin response factor	31.3173	48.0344	14.0331	4.20097	6.62658	Phytohormone action.jasmonic acid;RNA biosynthesis	ARF	0.473001
sbi-miR160.2	Sobic.002G363100	3.75	-1	1915	1937	UGCCUGGCUCCCU--GUAUGCCA	:::::: :::::::::::::	CCGCAUACGCAGGGAGCCAGGCA	Cleavage	-	-	-	AT1G13950;AT1G69410	EUKARYOTIC ELONGATION FACTOR 5A-1 (ELF5A-1)#(AT1G13950);EUKARYOTIC ELONGATION FACTOR 5A-3 (ELF5A-3)#(AT1G69410)	Encodes eukaryotic translation initiation factor 5A (EIF-5A).In mammalian cells it functions as a shuttle protein that translocates mRNA from the nucleus to cytoplasmic ribosomes. Overexpression results in an increase in both primary and secondary xylem formation. In RNAi suppressed lines, xylem formation is reduced.#(AT1G13950);Encodes eIF5A-2, a putative eukaryotic translation initiation factor…	Zm00001eb108410;Zm00001eb326630	-;-	Eukaryotic translation initiation factor 5A.#(Zm00001eb108410);Eukaryotic translation initiation factor 5A.#(Zm00001eb326630)	842.978	844.556	443.798	320.121	219.483	Protein biosynthesis	-	0.536007
sbi-miR160.2	Sobic.002G275600	4.5	-1	3371	3391	UGCCUGGCUCCCUGUAUGCCA	:::.: :.::::::: .:::.	UGGUAAAUAGGGAGCAGGGCG	Cleavage	LOC_Os11g36390	-	-	AT5G22010	REPLICATION FACTOR C1 (RFC1)	Encodes RFC1, the largest subunit of replication factor C. Mediates genomic stability and transcriptional gene silencing.	Zm00001eb114240	-	Replication factor C subunit 1	27.0533	28.8408	9.51823	6.66404	2.43269	Cell division	-	0.546021
sbi-miR160.2	Sobic.005G102900	3.5	-1	302	322	UGCCUGGCUCCCUGUAUGCCA	:::::::::.:: .::::	ACCCAUACAGGGGGCAGGGCA	Cleavage	LOC_Os11g10610;LOC_Os11g10550	-;-	-;-	-	-	-	Zm00001eb116510	LOC103648229	Disease resistance protein RGA2	0.0509726	0.074744	0	0.00276523	0	Enzyme classification	-	0.560862
sbi-miR160.2	Sobic.010G048900	4	-1	343	363	UGCCUGGCUCCCUGUAUGCCA	:::..: :::::::.:::: :	UGGUGUUCAGGGAGUCAGGAA	Cleavage	-	-	-	-	-	-	-	-	-	26.3327	12.7867	10.4415	3.59866	0.258714	-	-	0.601705
sbi-miR160.2	Sobic.006G220000	5	-1	1316	1336	UGCCUGGCUCCCUGUAUGCCA	:::.::. ::::.::::::	UGGUAUGAAGGGGGCCAGGGC	Cleavage	LOC_Os04g53130;LOC_Os04g53170	-;-	-;-	AT5G10550;AT5G65630	GLOBAL TRANSCRIPTION FACTOR GROUP E2 (GTE2)#(AT5G10550);GLOBAL TRANSCRIPTION FACTOR GROUP E7 (GTE7)#(AT5G65630)	This gene is predicted to encode a bromodomain-containing protein. A plant line expressing RNAi constructs targeted against GTE7 shows some resistance to agrobacterium-mediated root transformation.#(AT5G10550);This gene is predicted to encode a bromodomain-containing protein. Plant lines expressing RNAi constructs targeted against GTE7 show some resistance to agrobacterium-mediated root transform…	Zm00001eb070320	-	Transcription factor GTE3	93.0512	50.7417	39.7996	26.0925	17.7209	Chromatin organisation	-	0.664463
sbi-miR160.2	Sobic.001G261200	3	-1	21	41	UGCCUGGCUCCCUGUAUGCCA	::.:.:::::::.:.:::	CCGCGUGCAGGGAGUCGGGCU	Cleavage	-	-	-	-	-	-	Zm00001eb028020	-	MFS domain-containing protein	25.4996	17.1694	3.04127	3.40285	2.59273	Solute transport	-	0.773364
sbi-miR160.2	Sobic.006G278900	0.5	-1	1539	1559	UGCCUGGCUCCCUGUAUGCCA	::::::.::::::::::::::	UGGCAUGCAGGGAGCCAGGCA	Cleavage	LOC_Os04g59430	-	-	-	-	-	Zm00001eb076420	-	Auxin response factor	8.9537	5.99005	1.24525	1.08981	1.64269	RNA biosynthesis	ARF	0.821343
sbi-miR160.2	Sobic.005G112000	3.5	-1	421	441	UGCCUGGCUCCCUGUAUGCCA	::: :::::::.::.::: :	GGGCCUACAGGGGGCUAGGGA	Cleavage	LOC_Os11g28310	-	-	-	-	-	Zm00001eb169890	-	CRIB domain-containing protein	1.77683	0.453565	0.0369724	0.161327	0.245703	Multi-process regulation	-	0.850651
sbi-miR160.2	Sobic.002G175000	3.5	-1	860	880	UGCCUGGCUCCCUGUAUGCCA	::.::: ::::.::::: ::	AGGUAUAGAGGGGGCCAGACA	Cleavage	-	-	-	-	-	-	-	-	-	0.0613657	0.0490698	0.00627583	0	0.0242286	-	-	0.90068
sbi-miR160.2	Sobic.002G429700	3	-1	1679	1699	UGCCUGGCUCCCUGUAUGCCA	:.:::::::::: ..::::	AUGUAUACAGGGAGAUGGGCA	Cleavage	LOC_Os07g49270	-	-	AT2G38280	EMBRYONIC FACTOR1 (FAC1)	Encodes a protein with in vitro AMP deaminase activity that is involved in embryogenesis. Homozygous mutant embryos fail to develop past the zygote stage.	Zm00001eb331540	-	AMP deaminase	75.8934	61.403	40.2877	36.0544	54.9954	Nucleotide metabolism	-	0.965809
sbi-miR164.1	Sobic.003G013000	3	-1	2536	2556	UGGAGAAGCAGGACACGUGAG	.:: .::::..:::::.::::	UUCUUGUGUUUUGCUUUUCCA	Cleavage	LOC_Os01g12390;LOC_Os01g12390;LOC_Os01g12390;LOC_Os01g12390;LOC_Os01g12390;LOC_Os01g12390;LOC_Os01g12390;LOC_Os01g12390	OsSRLK#(LOC_Os01g12390);OsSRLK#(LOC_Os01g12390);OsSRLK#(LOC_Os01g12390);OsSRLK#(LOC_Os01g12390);OsSRLK#(LOC_Os01g12390);OsSRLK#(LOC_Os01g12390);OsSRLK#(LOC_Os01g12390);OsSRLK#(LOC_Os01g12390)	Furthermore, ultrastructural analysis revealed that ossrlk leaves maintained the chloroplast structure with intact grana stacks during dark incubation; however, the retained green color and preserved chloroplast structures of ossrlk did not enhance the photosynthetic competence during age-dependent senescence in autumn.#(chloroplast#(OsSRLK#(LOC_Os01g12390)));The detached leaves of ossrlk mutant …	AT4G23740	-	Leucine-rich repeat protein kinase family protein.	Zm00001eb338910	-	Putative inactive receptor kinase	17.3856	18.2183	9.61244	3.8273	4.16327	Enzyme classification;Protein modification	-	-0.832105
sbi-miR164.1	Sobic.002G037200	4	-1	1957	1977	UGGAGAAGCAGGACACGUGAG	::.:.:: :::::::: :.::	CUUAUGUAUCCUGCUUAUUCA	Cleavage	-	-	-	-	-	-	-	-	-	1.81587	2.45656	1.37599	0.833326	0.0273181	-	-	-0.743448
sbi-miR164.1	Sobic.007G129000	2.5	-1	377	397	UGGAGAAGCAGGACACGUGAG	.:: : ::::::::::.::::	UUCCCUUGUCCUGCUUUUCCA	Cleavage	LOC_Os08g32500	-	-	AT5G62890;AT5G49990	-;-	Xanthine/uracil permease family protein.#(AT5G62890);Xanthine/uracil permease family protein.#(AT5G49990)	Zm00001eb042450	-	Nucleobase-ascorbate transporter 6	11.8344	18.8141	20.9371	8.87658	0.227953	Solute transport	-	-0.735251
sbi-miR164.1	Sobic.009G170200	3	-1	1580	1600	UGGAGAAGCAGGACACGUGAG	: .:. ::::.::::::::.:	CCUAUUUGUCUUGCUUCUCUA	Cleavage	LOC_Os05g49970	-	-	AT1G17220	FU-GAERI1 (FUG1)	Encodes a chloroplast localized protein with similarity to translation initiation factor 2. Can complement loss of INFB in E.coli suggesting FUG1 does function as a translation initiation factor in vivo. Identified as a suppressor of the leaf variegation mutant var2-6. Suppression is only seen in hypomorphs as complete loss of function alleles are embryo lethal. The mRNA is cell-to-cell mobile.	Zm00001eb286620;Zm00001eb286640	-;-	Tr-type G domain-containing protein.#(Zm00001eb286620);Tr-type G domain-containing protein.#(Zm00001eb286640)	49.2382	61.091	26.2982	16.0737	2.34069	Protein biosynthesis	-	-0.734472
sbi-miR164.1	Sobic.010G097000	4.5	-1	1552	1571	UGGAGAAGCAGGACACGUGAG	::::.::::.::: ::::.::	CUCAUGUGUUCUG-UUCUUCA	Cleavage	LOC_Os06g12870	-	-	AT1G70230	TRICHOME BIREFRINGENCE-LIKE 27 (TBL27)	Encodes a member of the TBL (TRICHOME BIREFRINGENCE-LIKE) gene family containing a plant-specific DUF231 (domain of unknown function) domain. A putative xyloglucan O-acetyltransferase. TBL gene family has 46 members, two of which (TBR/AT5G06700 and TBL3/AT5G01360) have been shown to be involved in the synthesis and deposition of secondary wall cellulose, presumably by influencing the esterificati…	-	-	-	3.75613	2.31305	1.53373	1.07101	0.997516	Cell wall organisation	-	-0.707886
sbi-miR164.1	Sobic.001G030000	3	-1	2075	2095	UGGAGAAGCAGGACACGUGAG	:::: :.::::::.::::	GAAACGUCUUCUGCUUUUCCA	Cleavage	LOC_Os03g61050;LOC_Os03g61050;LOC_Os03g61050;LOC_Os03g61050;LOC_Os03g61050;LOC_Os03g61050;LOC_Os03g61050;LOC_Os03g61050;LOC_Os03g61050;LOC_Os03g61050;LOC_Os03g61050;LOC_Os03g61050;LOC_Os03g61050;LOC_Os03g61050;LOC_Os03g61050;LOC_Os03g61050;LOC_Os03g61050;LOC_Os03g61050;LOC_Os03g61050;LOC_Os03g61050;LOC_Os03g61050	OsDEX1#(LOC_Os03g61050);OsDEX1#(LOC_Os03g61050);OsDEX1#(LOC_Os03g61050);OsDEX1#(LOC_Os03g61050);OsDEX1#(LOC_Os03g61050);OsDEX1#(LOC_Os03g61050);OsDEX1#(LOC_Os03g61050);OsDEX1#(LOC_Os03g61050);OsDEX1#(LOC_Os03g61050);OsDEX1#(LOC_Os03g61050);OsDEX1#(LOC_Os03g61050);OsDEX1#(LOC_Os03g61050);OsDEX1#(LOC_Os03g61050);OsDEX1#(LOC_Os03g61050);OsDEX1#(LOC_Os03g61050);OsDEX1#(LOC_Os03g61050);OsDEX1#(LOC_Os0…	Here we report a role of OsDEX1 (Defective in Exine Formation 1 in rice), a Ca2+ binding protein, in regulating rice tapetal cell degradation and pollen formation.#(pollen#(OsDEX1#(LOC_Os03g61050)));In osdex1 anthers, tapetal cell degeneration is delayed and degradation of the callose wall surrounding the microspores is compromised, leading to aborted pollen formation and complete male sterility.…	AT3G09090	DEFECTIVE IN EXINE FORMATION 1 (DEX1)	Encodes DEX1 (defective in exine formation). Required for exine pattern formation during pollen development.	Zm00001eb063130	-	Protein DEFECTIVE IN EXINE FORMATION 1	91.557	114.3	38.2527	22.9407	11.133	Plant reproduction	-	-0.706129
sbi-miR164.1	Sobic.006G105600	3.5	-1	3259	3279	UGGAGAAGCAGGACACGUGAG	: ::::::::: .:::::::	CCCACGUGUCCACUUUCUCCA	Translation	LOC_Os04g38570;LOC_Os04g38570;LOC_Os04g38570;LOC_Os04g38570;LOC_Os04g38570	OsABCB14#(LOC_Os04g38570);OsABCB14#(LOC_Os04g38570);OsABCB14#(LOC_Os04g38570);OsABCB14#(LOC_Os04g38570);OsABCB14#(LOC_Os04g38570)	OsABCB14 functions in auxin transport and iron homeostasis in rice (Oryza sativa L.).#(auxin transport#(OsABCB14#(LOC_Os04g38570)));OsABCB14 functions in auxin transport and iron homeostasis in rice (Oryza sativa L.).#(iron homeostasis#(OsABCB14#(LOC_Os04g38570)));OsABCB14 functions in auxin transport and iron homeostasis in rice (Oryza sativa L.).#(iron#(OsABCB14#(LOC_Os04g38570)));OsABCB14 func…	AT3G28860	ATP-BINDING CASSETTE B19 (ABCB19)	Encodes a member of the ATP-binding cassette (ABC) transporter family that is involved in auxin transport and is involved in postembryonic organ separation. Also known as AtMDR11 and PGP19. Possibly regulates auxin-dependent responses by influencing basipetal auxin transport in the root. Acts upstream of phyA in regulating hypocotyl elongation and gravitropic response. Exerts nonredundant, partia…	Zm00001eb424060	-	ABC transporter B family member 19	17.9292	32.0825	9.43951	1.23741	3.16999	Phytohormone action.auxin;Solute transport	-	-0.702054
sbi-miR164.1	Sobic.010G155800	4	-1	1608	1628	UGGAGAAGCAGGACACGUGAG	:..:::::.. :::::::.:	AUUGCGUGUUUAGCUUCUCUA	Translation	LOC_Os06g34060	-	-	-	-	-	Zm00001eb277910	-	Similar to TRICHOME BIREFRINGENCE-LIKE 38	0.525721	0.44965	0.422609	0.326125	0	-	-	-0.686563
sbi-miR164.1	Sobic.002G147100	3	-1	1491	1510	UGGAGAAGCAGGACACGUGAG	::::::: :::::::::::..	CUCACGU-UCCUGCUUCUCUG	Cleavage	LOC_Os09g09360	-	-	AT3G27325	(PGAP1)	ER localized GPI inositol-deacylase. Involved in GPI-anchor remodeling.	Zm00001eb308720	LOC100279182	GPI inositol-deacylase	9.41052	11.3077	2.98383	1.89423	0.815074	Protein modification	-	-0.681737
sbi-miR164.1	Sobic.008G046700	3	-1	1948	1968	UGGAGAAGCAGGACACGUGAG	: ::. :::.::::::::::	CACAUUUGUUCUGCUUCUCCC	Cleavage	LOC_Os12g06540	-	-	-	-	-	Zm00001eb139470	-	nodulation-signaling pathway 2 protein-like	3.84546	4.13091	0.72825	0.267316	0.330767	RNA biosynthesis	GRAS	-0.679233
sbi-miR164.1	Sobic.003G329400	3.5	-1	1536	1556	UGGAGAAGCAGGACACGUGAG	::::. :: .:::::::::::	CUCAUCUGCUCUGCUUCUCCA	Cleavage	LOC_Os01g59340	-	-	AT5G12200	PYRIMIDINE 2 (PYD2)	Encodes a protein with dihydropyrimidine amidohydrolase activity. It localizes to the secretory system and plays a role in uracil metabolism.	Zm00001eb150370	-	Dihydropyrimidinase	29.0976	35.5113	18.3175	17.0215	6.4661	Nucleotide metabolism	-	-0.650567
sbi-miR164.1	Sobic.002G076000	4.5	-1	1249	1269	UGGAGAAGCAGGACACGUGAG	:::::: ::: ::::::.::	CUCACGGGUCAAGCUUCUUCA	Translation	LOC_Os07g10820	-	-	AT4G36790	-	Major facilitator superfamily protein.	-	-	-	28.7966	36.4038	6.31299	4.04609	2.37122	Solute transport	-	-0.644909
sbi-miR164.1	Sobic.006G225700	3.5	-1	2324	2344	UGGAGAAGCAGGACACGUGAG	..::: ::::::::::::	AAGGUGUGCCCUGCUUCUCCA	Cleavage	-	-	-	-	-	-	-	-	-	0.605386	0.520884	0.0428316	0.0139387	0.0483576	Chromatin organisation	-	-0.641323
sbi-miR164.1	Sobic.007G071000	1.5	-1	872	892	UGGAGAAGCAGGACACGUGAG	:: :::::::::::::::.	AGCAGGUGUCCUGCUUCUCCG	Cleavage	LOC_Os08g10080	OMTN6	Overexpression of OMTN2, OMTN3, OMTN4, and OMTN6 in rice led to negative effects on drought resistance at the reproductive stage.	-	-	-	Zm00001eb413540	-	NAC domain-containing protein	8.5233	7.44361	2.52178	3.00251	0.526694	RNA biosynthesis	NAC	-0.618307
sbi-miR164.1	Sobic.002G369000	4.5	-1	3718	3739	UGGAGAAGCAGGACACG-UGAG	:::: ::::::.::.:::: ::	CUCAGCGUGUCUUGUUUCUACA	Cleavage	LOC_Os07g41470;LOC_Os07g41400	-;-	-;-	-	-	-	Zm00001eb327080	-	-	0.0479492	0.050214	0	0	0	-	-	-0.613746
sbi-miR164.1	Sobic.003G400000	4.5	-1	843	863	UGGAGAAGCAGGACACGUGAG	:::.: ::::::::: .:::	CUCGCUUGUCCUGCUCUUCCU	Cleavage	LOC_Os01g68620	-	-	-	-	-	Zm00001eb143550	-	Signal peptide peptidase-like 3	292.031	400.281	0.227852	0.240188	0.129514	Protein modification	-	-0.588158
sbi-miR164.1	Sobic.003G128500	3	-1	1124	1144	UGGAGAAGCAGGACACGUGAG	::.:::::: :.::::.::	AGCAUGUGUCCAGUUUCUUCA	Translation	-	-	-	AT5G38390;AT3G58860;AT5G38396;AT1G52650;AT3G58820;AT3G58900;AT4G13960;AT3G58950;AT3G58910;AT5G38386;AT3G59000	-;-;-;-;-;-;-;-;-;-;-	F-box/RNI-like superfamily protein.#(AT5G38390);F-box/RNI-like superfamily protein.#(AT3G58860);F-box/RNI-like superfamily protein.#(AT5G38396);F-box/RNI superfamily protein.#(AT1G52650);F-box/RNI-like superfamily protein.#(AT3G58820);F-box/RNI-like superfamily protein.#(AT3G58900);F-box/RNI-like superfamily protein.#(AT4G13960);F-box/RNI-like superfamily protein.#(AT3G58950);F-box family protein…	Zm00001eb411850;Zm00001eb152580	-;-	FBD domain-containing protein.#(Zm00001eb411850);FBD domain-containing protein.#(Zm00001eb152580)	8.79192	4.79118	2.34576	1.10587	5.1315	-	-	-0.497819
sbi-miR164.1	Sobic.002G049900	3	-1	750	770	UGGAGAAGCAGGACACGUGAG	.:.:::::::.::.:::::.	UUUACGUGUCUUGUUUCUCUC	Cleavage	-	-	-	-	-	-	-	-	-	0.0401931	0	0	0	0	-	-	-0.441837
sbi-miR164.1	Sobic.004G191700	1.5	-1	1082	1102	UGGAGAAGCAGGACACGUGAG	: :::::: ::::::::::::	CACACGUGACCUGCUUCUCCA	Cleavage	LOC_Os02g36880	OMTN1	Under cold stress, the expression levels of OMTN1 and OMTN2 were increased, while the expression levels of the other three genes (OMTN3, OMTN4, and OMTN6) did not change significantly.	AT3G29035;AT5G07680;AT5G61430;AT5G39610	NAC DOMAIN CONTAINING PROTEIN 3 (NAC3)#(AT3G29035);NAC DOMAIN CONTAINING PROTEIN 80 (NAC080)#(AT5G07680);NAC DOMAIN CONTAINING PROTEIN 100 (NAC100)#(AT5G61430);NAC DOMAIN CONTAINING PROTEIN 6 (NAC6)#(AT5G39610)	Encodes a protein with transcription factor activity. Note: this protein (AT3G29035) on occasion has also been referred to as AtNAC3, not to be confused with the AtNAC3 found at locus AT3G15500. The mRNA is cell-to-cell mobile.#(AT3G29035);NAC domain containing protein 80.#(AT5G07680);(NAC) domain transcription factor; regulated at both transcriptional and post-transcriptional levels under Fe-def…	Zm00001eb245030	-	NAC domain-containing protein	4.06367	22.8272	33.9661	14.2619	1.2668	RNA biosynthesis	NAC	-0.420706
sbi-miR164.1	Sobic.002G199200	3	-1	905	925	UGGAGAAGCAGGACACGUGAG	:::::: :::::::::::	AGCACGUGAACUGCUUCUCCA	Cleavage	LOC_Os09g24560	-	-	-	-	-	-	-	-	0.0204033	0.122422	0	0	0	-	NAC	-0.397999
sbi-miR164.1	Sobic.010G227300	2.5	-1	993	1013	UGGAGAAGCAGGACACGUGAG	:: ::: ::::::::::::	AGCAAGUGCCCUGCUUCUCCA	Cleavage	LOC_Os06g46270;LOC_Os06g46270;LOC_Os06g46270;LOC_Os06g46270;LOC_Os06g46270;LOC_Os06g46270;LOC_Os06g46270;LOC_Os06g46270;LOC_Os06g46270;LOC_Os06g46270;LOC_Os06g46270;LOC_Os06g46270;LOC_Os06g46270;LOC_Os06g46270;LOC_Os06g46270	OMTN4|ONAC011|OsY37#(LOC_Os06g46270);OMTN4|ONAC011|OsY37#(LOC_Os06g46270);OMTN4|ONAC011|OsY37#(LOC_Os06g46270);OMTN4|ONAC011|OsY37#(LOC_Os06g46270);OMTN4|ONAC011|OsY37#(LOC_Os06g46270);OMTN4|ONAC011|OsY37#(LOC_Os06g46270);OMTN4|ONAC011|OsY37#(LOC_Os06g46270);OMTN4|ONAC011|OsY37#(LOC_Os06g46270);OMTN4|ONAC011|OsY37#(LOC_Os06g46270);OMTN4|ONAC011|OsY37#(LOC_Os06g46270);OMTN4|ONAC011|OsY37#(LOC_Os06…	Overexpression of OMTN2, OMTN3, OMTN4, and OMTN6 in rice led to negative effects on drought resistance at the reproductive stage.#(drought resistance#(OMTN4|ONAC011|OsY37#(LOC_Os06g46270)));The NAC Transcription Factor Gene OsY37 (ONAC011) Promotes Leaf Senescence and Accelerates Heading Time in Rice.#(leaf#(OMTN4|ONAC011|OsY37#(LOC_Os06g46270)));The NAC Transcription Factor Gene OsY37 (ONAC011) …	AT3G12977;AT1G56010	NAC1 LIKE (NAC1L)#(AT3G12977);NAC DOMAIN CONTAINING PROTEIN 1 (NAC1)#(AT1G56010)	NAC transcription regulator. Regulates endosperm cell expansion during germination.#(AT3G12977);Encodes a transcription factor involved auxin-mediated lateral root formation. Acts downstream of TIR1 and is regulated post-transcriptionally by miRNA164 and by SINAT5-dependent ubiquitination.#(AT1G56010)	Zm00001eb224800	-	NAC domain-containing protein	9.92299	29.4599	8.7764	10.4496	0.401491	RNA biosynthesis	NAC	-0.397016
sbi-miR164.1	Sobic.001G156600	3	-1	561	581	UGGAGAAGCAGGACACGUGAG	::::::::: :::::::.	CCAACGUGUCCUUCUUCUCCG	Cleavage	LOC_Os12g41530;LOC_Os12g41490;LOC_Os12g41510	-;-;-	-;-;-	-	-	-	-	-	-	0.580417	3.20285	0.343625	0.356383	0	Enzyme classification;Protein modification	-	-0.391921
sbi-miR164.1	Sobic.001G521600	4.5	-1	230	251	UGGAGAAGCAG-GACACGUGAG	:::::::::. ::::::::.:.	CUCACGUGUUACUGCUUCUUCG	Translation	LOC_Os02g13410	-	-	-	-	-	-	-	-	0.0915705	0.202609	0.00649541	0.0503511	0	Enzyme classification	-	-0.373408
sbi-miR164.1	Sobic.006G151500	3	-1	3147	3167	UGGAGAAGCAGGACACGUGAG	::: :::.::::::.:::	AACACAUGUUCUGCUUUUCCC	Cleavage	LOC_Os04g44230	-	-	-	-	-	Zm00001eb076990	-	Cytokinin dehydrogenase	0.0586417	0.260089	0.0301473	0.0500121	0	Enzyme classification;Phytohormone action.cytokinin	-	-0.360335
sbi-miR164.1	Sobic.006G107400	2	-1	871	891	UGGAGAAGCAGGACACGUGAG	: :::::: :::::::::::.	CACACGUGACCUGCUUCUCCG	Cleavage	LOC_Os04g38720;LOC_Os04g38720;LOC_Os04g38720;LOC_Os04g38720;LOC_Os04g38720;LOC_Os04g38720;LOC_Os04g38720;LOC_Os04g38720;LOC_Os04g38720;LOC_Os04g38720;LOC_Os04g38720;LOC_Os04g38720;LOC_Os04g38720;LOC_Os04g38720;LOC_Os04g38720;LOC_Os04g38720;LOC_Os04g38720;LOC_Os04g38720;LOC_Os04g38720;LOC_Os04g38720;LOC_Os04g38720;LOC_Os04g38720;LOC_Os04g38720;LOC_Os04g38720;LOC_Os04g38720;LOC_Os04g38720;LOC_Os04g…	OsNAC2|OsTIL1|OMTN2|OsORE1#(LOC_Os04g38720);OsNAC2|OsTIL1|OMTN2|OsORE1#(LOC_Os04g38720);OsNAC2|OsTIL1|OMTN2|OsORE1#(LOC_Os04g38720);OsNAC2|OsTIL1|OMTN2|OsORE1#(LOC_Os04g38720);OsNAC2|OsTIL1|OMTN2|OsORE1#(LOC_Os04g38720);OsNAC2|OsTIL1|OMTN2|OsORE1#(LOC_Os04g38720);OsNAC2|OsTIL1|OMTN2|OsORE1#(LOC_Os04g38720);OsNAC2|OsTIL1|OMTN2|OsORE1#(LOC_Os04g38720);OsNAC2|OsTIL1|OMTN2|OsORE1#(LOC_Os04g38720);OsN…	Overexpression of OsNAC2 regulates shoot branching in rice.#(branching#(OsNAC2|OsTIL1|OMTN2|OsORE1#(LOC_Os04g38720)));Overexpression of OsNAC2 contributes tiller bud outgrowth, but does not affect tiller bud initiation.#(tiller#(OsNAC2|OsTIL1|OMTN2|OsORE1#(LOC_Os04g38720)));Here, an activation-tagging mutant Ostil1 (Oryza sativa tillering1) was characterized, which showed increased tillers, enlar…	AT3G29035;AT5G07680;AT5G61430;AT5G39610	NAC DOMAIN CONTAINING PROTEIN 3 (NAC3)#(AT3G29035);NAC DOMAIN CONTAINING PROTEIN 80 (NAC080)#(AT5G07680);NAC DOMAIN CONTAINING PROTEIN 100 (NAC100)#(AT5G61430);NAC DOMAIN CONTAINING PROTEIN 6 (NAC6)#(AT5G39610)	Encodes a protein with transcription factor activity. Note: this protein (AT3G29035) on occasion has also been referred to as AtNAC3, not to be confused with the AtNAC3 found at locus AT3G15500. The mRNA is cell-to-cell mobile.#(AT3G29035);NAC domain containing protein 80.#(AT5G07680);(NAC) domain transcription factor; regulated at both transcriptional and post-transcriptional levels under Fe-def…	Zm00001eb080700	-	NAC domain-containing protein 79	18.1199	169.985	187.634	101.544	4.8287	RNA biosynthesis	NAC	-0.350668
sbi-miR164.1	Sobic.002G414850	2	-1	579	599	UGGAGAAGCAGGACACGUGAG	: :::::::.:: ::::::::	CGCACGUGUUCUCCUUCUCCA	Cleavage	-	-	-	-	-	-	-	-	-	0.0458444	1.10546	0	0	0	-	-	-0.334668
sbi-miR164.1	Sobic.008G164800	2.5	-1	874	894	UGGAGAAGCAGGACACGUGAG	:: ::: ::::::::::::	AGCAGGUGCCCUGCUUCUCCA	Cleavage	LOC_Os12g41680;LOC_Os12g41680;LOC_Os12g41680;LOC_Os12g41680;LOC_Os12g41680;LOC_Os12g41680;LOC_Os12g41680;LOC_Os12g41680	OMTN3|OsNAC60#(LOC_Os12g41680);OMTN3|OsNAC60#(LOC_Os12g41680);OMTN3|OsNAC60#(LOC_Os12g41680);OMTN3|OsNAC60#(LOC_Os12g41680);OMTN3|OsNAC60#(LOC_Os12g41680);OMTN3|OsNAC60#(LOC_Os12g41680);OMTN3|OsNAC60#(LOC_Os12g41680);OMTN3|OsNAC60#(LOC_Os12g41680)	Overexpression of OMTN2, OMTN3, OMTN4, and OMTN6 in rice led to negative effects on drought resistance at the reproductive stage.#(drought resistance#(OMTN3|OsNAC60#(LOC_Os12g41680)));OsNAC60 encodes a transcription factor, over-expression of which enhanced defense responses, such as increased programmed cell death, greater ion leakage, more ROS accumulation and callose deposition, and up-regulat…	-	-	-	Zm00001eb135910	-	NAC domain-containing protein	5.29759	3.27827	5.5097	5.79035	0.0354764	RNA biosynthesis	NAC	-0.267937
sbi-miR164.1	Sobic.008G071400	2.5	-1	1174	1194	UGGAGAAGCAGGACACGUGAG	: :::: ::::::::::::	AGCUCGUGCCCUGCUUCUCCA	Cleavage	LOC_Os06g23650;LOC_Os06g23650;LOC_Os06g23650;LOC_Os06g23650;LOC_Os06g23650;LOC_Os06g23650;LOC_Os06g23650;LOC_Os06g23650;LOC_Os06g23650	OsCUC1|OMTN5#(LOC_Os06g23650);OsCUC1|OMTN5#(LOC_Os06g23650);OsCUC1|OMTN5#(LOC_Os06g23650);OsCUC1|OMTN5#(LOC_Os06g23650);OsCUC1|OMTN5#(LOC_Os06g23650);OsCUC1|OMTN5#(LOC_Os06g23650);OsCUC1|OMTN5#(LOC_Os06g23650);OsCUC1|OMTN5#(LOC_Os06g23650);OsCUC1|OMTN5#(LOC_Os06g23650)	Further study indicated that OsCUC1 physically interacts with leaf-rolling related protein CURLED LEAF AND DWARF 1 (CLD1) and stabilizes it in the nucleus to control leaf morphology.#(leaf#(OsCUC1|OMTN5#(LOC_Os06g23650)));In addition, knockout of OsCUC1 leads to multiple defects, including dwarf plant architecture, male sterility and twisted-rolling leaves.#(sterility#(OsCUC1|OMTN5#(LOC_Os06g2365…	AT5G53950	CUP-SHAPED COTYLEDON 2 (CUC2)	Transcriptional activator of the NAC gene family, with CUC1 redundantly required for embryonic apical meristem formation, cotyledon separation and expression of STM. Proper timing of CUC2 expression is required to maintain the phyllotactic pattern initiated in the meristem. CUC2 expression in leaf sinus region is required for serration and the extent of serration is modulated by mir164A mediated …	Zm00001eb264380	-	Protein CUP-SHAPED COTYLEDON 2	0.0664683	0.0679248	0.0197044	0.0559197	0	RNA biosynthesis	NAC	-0.255931
sbi-miR164.1	Sobic.006G243700	3.5	-1	4702	4722	UGGAGAAGCAGGACACGUGAG	:.::::::.. :.:::::::	GUUACGUGUUUGGUUUCUCCA	Translation	LOC_Os04g55760	-	-	AT1G21250;AT3G25490;AT1G21270;AT1G21210;AT1G21230;AT1G21240	CELL WALL-ASSOCIATED KINASE 1 (WAK1)#(AT1G21250);-;WALL-ASSOCIATED KINASE 2 (WAK2)#(AT1G21270);WALL ASSOCIATED KINASE 4 (WAK4)#(AT1G21210);WALL ASSOCIATED KINASE 5 (WAK5)#(AT1G21230);WALL ASSOCIATED KINASE 3 (WAK3)#(AT1G21240)	Encodes a cell wall-associated kinase that interacts with AtGRP3 and may function as a signaling receptor of extracellular matrix component such as oligogalacturonides. The mRNA is cell-to-cell mobile.#(AT1G21250);Protein kinase family protein.#(AT3G25490);cytoplasmic serine/threonine protein kinase induced by salicylic acid. mutant plants exhibit a loss of cell expansion and dependence on sugars…	Zm00001eb068170	LOC100836833	Protein kinase domain-containing protein	0.116556	1.60785	0.719965	0.786948	0.0530344	Enzyme classification;Protein modification	-	-0.18489
sbi-miR164.1	Sobic.009G207500	5	-1	1917	1937	UGGAGAAGCAGGACACGUGAG	::.::::: :.::::::::	CUUACGUGCCUUGCUUCUCAG	Cleavage	-	-	-	AT1G32660;AT1G30790;AT5G22791;AT3G47150;AT1G70960;AT1G70380;AT1G70970	-;-;-;-;-;-;-	F-box and associated interaction domains-containing protein.#(AT1G32660);F-box and associated interaction domains-containing protein.#(AT1G30790);F-box family protein.#(AT5G22791);F-box and associated interaction domains-containing protein.#(AT3G47150);F-box and associated interaction domains-containing protein.#(AT1G70960);F-box and associated interaction domains-containing protein.#(AT1G70380);…	-	-	-	8.67754	2.97619	18.3084	11.7453	3.52879	-	-	-0.174986
sbi-miR164.1	Sobic.010G259600	4.5	-1	853	873	UGGAGAAGCAGGACACGUGAG	.::.:::: ::: :::::.:.	UUCGCGUGCCCUUCUUCUUCG	Cleavage	LOC_Os06g49660	-	-	-	-	-	Zm00001eb227640	-	Benzyl alcohol O-benzoyltransferase	1.22631	19.1916	5.3299	6.67189	4.57632	-	-	-0.120718
sbi-miR164.1	Sobic.003G327400	3	-1	719	739	UGGAGAAGCAGGACACGUGAG	.::::::: :::::::::	CGGGCGUGUCCCGCUUCUCCA	Translation	LOC_Os01g58850	-	-	AT3G63060	EID1-LIKE 3 (EDL3)	EDL3 is an F-box protein involved that mediated the regulation of abscisic acid signalling.	Zm00001eb150610	-	Circadian clock coupling factor ZGT	14.1813	0.507848	1.43093	0.62345	13.9835	Protein homeostasis	-	-0.0201536
sbi-miR164.1	Sobic.007G170500	4.5	-1	433	454	UGGAGAAGCAGGACACG-UGAG	:::. :::::::: :::::.::	CUCGUCGUGUCCUCCUUCUUCA	Cleavage	-	-	-	AT4G35160;AT4G35150	N-ACETYLSEROTONIN O-METHYLTRANSFERASE (ASMT)#(AT4G35160);-	Encodes a cytosolic N-acetylserotonin O-methyltransferase that can convert N-acetylserotonin to melatonin and serotonin to 5-methoxytryptamine in the process of melatonin synthesis. It does not have caffeic acid O- methyltransferase activity.#(AT4G35160);O-methyltransferase family protein.#(AT4G35150)	-	-	-	0.0347457	0.100259	7.41347	6.54473	0	Enzyme classification	-	0.185337
sbi-miR164.1	Sobic.001G345900	3.5	-1	1017	1037	UGGAGAAGCAGGACACGUGAG	: :.::::.:::::::: ::	AUGAUGUGUUCUGCUUCUGCA	Cleavage	LOC_Os03g28040	-	-	-	-	-	Zm00001eb392800	-	Putative RING zinc finger domain superfamily protein	0.0528407	0.234405	0.359267	0.292449	0.238497	-	-	0.276131
sbi-miR164.1	Sobic.002G377000	3.5	-1	4014	4034	UGGAGAAGCAGGACACGUGAG	.:::::: :::::::::.	GGGGCGUGUCGUGCUUCUCCG	Translation	LOC_Os07g42730	-	-	-	-	-	-	-	-	16.6135	6.09898	0.912525	7.61867	37.9452	-	-	0.399237
sbi-miR164.1	Sobic.004G155150	5	-1	1839	1859	UGGAGAAGCAGGACACGUGAG	::::.:: ::.:::::.::	CUCAUGUAUCUUGCUUUUCGU	Cleavage	-	-	-	-	-	-	-	-	-	0.168536	0.0863384	0.0576973	0.117998	0.524803	-	-	0.459852
sbi-miR164.1	Sobic.008G035000	3	-1	22	42	UGGAGAAGCAGGACACGUGAG	:::: : ::.:::::::.::	AUCACCUCUCUUGCUUCUUCA	Cleavage	-	-	-	-	-	-	-	-	-	0	0.0582093	0	0.091368	0	-	-	0.526892
sbi-miR164.1	Sobic.004G239750	3	-1	221	241	UGGAGAAGCAGGACACGUGAG	: ::.::::..:::: :::::	CGCAUGUGUUUUGCUCCUCCA	Cleavage	-	-	-	-	-	-	-	-	-	0.492091	0.228309	0.827251	1.10606	1.15398	-	-	0.775998
sbi-miR164.2	Sobic.010G259500	3	-1	907	926	UGGAGAAGCAGGGCACGUGC	:.:::::::: :::::.:.	UCGCGUGCCCUUCUUCUUCG	Cleavage	LOC_Os06g49660	-	-	-	-	-	Zm00001eb227640	-	Benzyl alcohol O-benzoyltransferase	0.489064	6.50808	2.28845	2.8341	2.6453	-	-	-0.54459
sbi-miR164.2	Sobic.004G239750	3.5	-1	222	241	UGGAGAAGCAGGGCACGUGC	:::.:::...:::: :::::	GCAUGUGUUUUGCUCCUCCA	Cleavage	-	-	-	-	-	-	-	-	-	0.492091	0.228309	0.827251	1.10606	1.15398	-	-	-0.530475
sbi-miR164.2	Sobic.010G259600	3	-1	854	873	UGGAGAAGCAGGGCACGUGC	:.:::::::: :::::.:.	UCGCGUGCCCUUCUUCUUCG	Cleavage	LOC_Os06g49660	-	-	-	-	-	Zm00001eb227640	-	Benzyl alcohol O-benzoyltransferase	1.22631	19.1916	5.3299	6.67189	4.57632	-	-	-0.392026
sbi-miR164.2	Sobic.010G052700	3.5	-1	284	303	UGGAGAAGCAGGGCACGUGC	:..:::::.:: :::::::.	GUGCGUGCUCUCCUUCUCCG	Cleavage	LOC_Os06g07040;LOC_Os06g07040	OsIAA20#(LOC_Os06g07040);OsIAA20#(LOC_Os06g07040)	Knockout of OsbZIP49 led to reduced expression of both OsGH3-2 and OsGH3-13 within the shoot base, and increased accumulation of IAA and increased OsIAA20 expression levels were observed in transformants following gravistimulation.#(shoot#(OsIAA20#(LOC_Os06g07040)));Knockout of OsbZIP49 led to reduced expression of both OsGH3-2 and OsGH3-13 within the shoot base, and increased accumulation of IAA…	-	-	-	Zm00001eb271530	-	Auxin-responsive protein IAA20	0.119183	31.8526	3.77891	2.70218	4.4931	Phytohormone action.auxin	-	-0.264647
sbi-miR164.2	Sobic.004G348600	3	-1	2013	2032	UGGAGAAGCAGGGCACGUGC	:..::::::::.::.:..:	CCGUGUGCCCUGUUUUUUUA	Cleavage	LOC_Os02g57470	-	-	AT2G31240	-	Tetratricopeptide repeat (TPR)-like superfamily protein.	Zm00001eb191190	-	Kinesin light chain	8.97124	9.8003	19.107	8.85336	17.8668	-	-	-0.227763
sbi-miR164.2	Sobic.001G283900	4	-1	633	652	UGGAGAAGCAGGGCACGUGC	:::.:::..:: :::::::	GCAUGUGUUCUCCUUCUCCC	Cleavage	-	-	-	-	-	-	-	-	-	0	0.0504493	0	0	0	-	-	-0.164642
sbi-miR164.2	Sobic.001G442600	3	-1	859	878	UGGAGAAGCAGGGCACGUGC	:.:::::.: ::::::::.	CCGCGUGCUCGGCUUCUCCG	Translation	LOC_Os03g13490	-	-	AT3G55820	-	Fasciclin-like arabinogalactan family protein.	-	-	-	0.0276432	0	9.78855	6.75203	1.13307	-	-	-0.136125
sbi-miR164.2	Sobic.002G414850	2.5	-1	580	599	UGGAGAAGCAGGGCACGUGC	:::::::..:: ::::::::	GCACGUGUUCUCCUUCUCCA	Cleavage	-	-	-	-	-	-	-	-	-	0.0458444	1.10546	0	0	0	-	-	-0.129513
sbi-miR164.2	Sobic.006G107400	2	-1	872	891	UGGAGAAGCAGGGCACGUGC	:::::: :::::::::::.	ACACGUGACCUGCUUCUCCG	Cleavage	LOC_Os04g38720;LOC_Os04g38720;LOC_Os04g38720;LOC_Os04g38720;LOC_Os04g38720;LOC_Os04g38720;LOC_Os04g38720;LOC_Os04g38720;LOC_Os04g38720;LOC_Os04g38720;LOC_Os04g38720;LOC_Os04g38720;LOC_Os04g38720;LOC_Os04g38720;LOC_Os04g38720;LOC_Os04g38720;LOC_Os04g38720;LOC_Os04g38720;LOC_Os04g38720;LOC_Os04g38720;LOC_Os04g38720;LOC_Os04g38720;LOC_Os04g38720;LOC_Os04g38720;LOC_Os04g38720;LOC_Os04g38720;LOC_Os04g…	OsNAC2|OsTIL1|OMTN2|OsORE1#(LOC_Os04g38720);OsNAC2|OsTIL1|OMTN2|OsORE1#(LOC_Os04g38720);OsNAC2|OsTIL1|OMTN2|OsORE1#(LOC_Os04g38720);OsNAC2|OsTIL1|OMTN2|OsORE1#(LOC_Os04g38720);OsNAC2|OsTIL1|OMTN2|OsORE1#(LOC_Os04g38720);OsNAC2|OsTIL1|OMTN2|OsORE1#(LOC_Os04g38720);OsNAC2|OsTIL1|OMTN2|OsORE1#(LOC_Os04g38720);OsNAC2|OsTIL1|OMTN2|OsORE1#(LOC_Os04g38720);OsNAC2|OsTIL1|OMTN2|OsORE1#(LOC_Os04g38720);OsN…	Overexpression of OsNAC2 regulates shoot branching in rice.#(branching#(OsNAC2|OsTIL1|OMTN2|OsORE1#(LOC_Os04g38720)));Overexpression of OsNAC2 contributes tiller bud outgrowth, but does not affect tiller bud initiation.#(tiller#(OsNAC2|OsTIL1|OMTN2|OsORE1#(LOC_Os04g38720)));Here, an activation-tagging mutant Ostil1 (Oryza sativa tillering1) was characterized, which showed increased tillers, enlar…	AT3G29035;AT5G07680;AT5G61430;AT5G39610	NAC DOMAIN CONTAINING PROTEIN 3 (NAC3)#(AT3G29035);NAC DOMAIN CONTAINING PROTEIN 80 (NAC080)#(AT5G07680);NAC DOMAIN CONTAINING PROTEIN 100 (NAC100)#(AT5G61430);NAC DOMAIN CONTAINING PROTEIN 6 (NAC6)#(AT5G39610)	Encodes a protein with transcription factor activity. Note: this protein (AT3G29035) on occasion has also been referred to as AtNAC3, not to be confused with the AtNAC3 found at locus AT3G15500. The mRNA is cell-to-cell mobile.#(AT3G29035);NAC domain containing protein 80.#(AT5G07680);(NAC) domain transcription factor; regulated at both transcriptional and post-transcriptional levels under Fe-def…	Zm00001eb080700	-	NAC domain-containing protein 79	18.1199	169.985	187.634	101.544	4.8287	RNA biosynthesis	NAC	-0.100646
sbi-miR164.2	Sobic.003G087600	2.5	-1	1172	1191	UGGAGAAGCAGGGCACGUGC	:: :::::::::::::::.	GCCGGUGCCCUGCUUCUCCG	Cleavage	LOC_Os01g03720;LOC_Os01g03720;LOC_Os01g03720;LOC_Os01g03720;LOC_Os01g03720;LOC_Os01g03720;LOC_Os01g03720;LOC_Os01g03720;LOC_Os01g03720;LOC_Os01g03720;LOC_Os01g03720;LOC_Os01g03720;LOC_Os01g03720;LOC_Os01g03720;LOC_Os01g03720	MYB1#(LOC_Os01g03720);MYB1#(LOC_Os01g03720);MYB1#(LOC_Os01g03720);MYB1#(LOC_Os01g03720);MYB1#(LOC_Os01g03720);MYB1#(LOC_Os01g03720);MYB1#(LOC_Os01g03720);MYB1#(LOC_Os01g03720);MYB1#(LOC_Os01g03720);MYB1#(LOC_Os01g03720);MYB1#(LOC_Os01g03720);MYB1#(LOC_Os01g03720);MYB1#(LOC_Os01g03720);MYB1#(LOC_Os01g03720);MYB1#(LOC_Os01g03720)	MYB1 was transcriptionally induced in leaf sheaths and old leaf blades.#(leaf#(MYB1#(LOC_Os01g03720)));Furthermore, MYB1 affected the elongation of the primary root in a Pi-dependent manner and lateral roots in a Pi-independent manner.#(root#(MYB1#(LOC_Os01g03720)));Moreover, gibberellic acid (GA)-triggered lateral root elongation was largely suppressed in wild-type plants under Pi starvation con…	-	-	-	Zm00001eb335060	-	transcription factor MYB62	2.27405	2.54908	8.39333	8.49956	1.07761	RNA biosynthesis	MYB	-0.094328
sbi-miR164.2	Sobic.002G199200	3	-1	906	925	UGGAGAAGCAGGGCACGUGC	::::::: :::::::::::	GCACGUGAACUGCUUCUCCA	Cleavage	LOC_Os09g24560	-	-	-	-	-	-	-	-	0.0204033	0.122422	0	0	0	-	NAC	-0.0190312
sbi-miR164.2	Sobic.004G191700	1.5	-1	1083	1102	UGGAGAAGCAGGGCACGUGC	:::::: ::::::::::::	ACACGUGACCUGCUUCUCCA	Cleavage	LOC_Os02g36880	OMTN1	Under cold stress, the expression levels of OMTN1 and OMTN2 were increased, while the expression levels of the other three genes (OMTN3, OMTN4, and OMTN6) did not change significantly.	AT3G29035;AT5G07680;AT5G61430;AT5G39610	NAC DOMAIN CONTAINING PROTEIN 3 (NAC3)#(AT3G29035);NAC DOMAIN CONTAINING PROTEIN 80 (NAC080)#(AT5G07680);NAC DOMAIN CONTAINING PROTEIN 100 (NAC100)#(AT5G61430);NAC DOMAIN CONTAINING PROTEIN 6 (NAC6)#(AT5G39610)	Encodes a protein with transcription factor activity. Note: this protein (AT3G29035) on occasion has also been referred to as AtNAC3, not to be confused with the AtNAC3 found at locus AT3G15500. The mRNA is cell-to-cell mobile.#(AT3G29035);NAC domain containing protein 80.#(AT5G07680);(NAC) domain transcription factor; regulated at both transcriptional and post-transcriptional levels under Fe-def…	Zm00001eb245030	-	NAC domain-containing protein	4.06367	22.8272	33.9661	14.2619	1.2668	RNA biosynthesis	NAC	0.000973694
sbi-miR164.2	Sobic.010G227300	1	-1	994	1013	UGGAGAAGCAGGGCACGUGC	::: ::::::::::::::::	GCAAGUGCCCUGCUUCUCCA	Cleavage	LOC_Os06g46270;LOC_Os06g46270;LOC_Os06g46270;LOC_Os06g46270;LOC_Os06g46270;LOC_Os06g46270;LOC_Os06g46270;LOC_Os06g46270;LOC_Os06g46270;LOC_Os06g46270;LOC_Os06g46270;LOC_Os06g46270;LOC_Os06g46270;LOC_Os06g46270;LOC_Os06g46270	OMTN4|ONAC011|OsY37#(LOC_Os06g46270);OMTN4|ONAC011|OsY37#(LOC_Os06g46270);OMTN4|ONAC011|OsY37#(LOC_Os06g46270);OMTN4|ONAC011|OsY37#(LOC_Os06g46270);OMTN4|ONAC011|OsY37#(LOC_Os06g46270);OMTN4|ONAC011|OsY37#(LOC_Os06g46270);OMTN4|ONAC011|OsY37#(LOC_Os06g46270);OMTN4|ONAC011|OsY37#(LOC_Os06g46270);OMTN4|ONAC011|OsY37#(LOC_Os06g46270);OMTN4|ONAC011|OsY37#(LOC_Os06g46270);OMTN4|ONAC011|OsY37#(LOC_Os06…	Overexpression of OMTN2, OMTN3, OMTN4, and OMTN6 in rice led to negative effects on drought resistance at the reproductive stage.#(drought resistance#(OMTN4|ONAC011|OsY37#(LOC_Os06g46270)));The NAC Transcription Factor Gene OsY37 (ONAC011) Promotes Leaf Senescence and Accelerates Heading Time in Rice.#(leaf#(OMTN4|ONAC011|OsY37#(LOC_Os06g46270)));The NAC Transcription Factor Gene OsY37 (ONAC011) …	AT3G12977;AT1G56010	NAC1 LIKE (NAC1L)#(AT3G12977);NAC DOMAIN CONTAINING PROTEIN 1 (NAC1)#(AT1G56010)	NAC transcription regulator. Regulates endosperm cell expansion during germination.#(AT3G12977);Encodes a transcription factor involved auxin-mediated lateral root formation. Acts downstream of TIR1 and is regulated post-transcriptionally by miRNA164 and by SINAT5-dependent ubiquitination.#(AT1G56010)	Zm00001eb224800	-	NAC domain-containing protein	9.92299	29.4599	8.7764	10.4496	0.401491	RNA biosynthesis	NAC	0.0481435
sbi-miR164.2	Sobic.009G207500	3.5	-1	1918	1937	UGGAGAAGCAGGGCACGUGC	.:::::::.::::::::	UUACGUGCCUUGCUUCUCAG	Cleavage	-	-	-	AT1G32660;AT1G30790;AT5G22791;AT3G47150;AT1G70960;AT1G70380;AT1G70970	-;-;-;-;-;-;-	F-box and associated interaction domains-containing protein.#(AT1G32660);F-box and associated interaction domains-containing protein.#(AT1G30790);F-box family protein.#(AT5G22791);F-box and associated interaction domains-containing protein.#(AT3G47150);F-box and associated interaction domains-containing protein.#(AT1G70960);F-box and associated interaction domains-containing protein.#(AT1G70380);…	-	-	-	8.67754	2.97619	18.3084	11.7453	3.52879	-	-	0.294573
sbi-miR164.2	Sobic.007G098500	4.5	-1	4077	4096	UGGAGAAGCAGGGCACGUGC	: :.:::::::::::.::	GGAUGUGCCCUGCUUUUCAU	Cleavage	LOC_Os09g07300	-	-	AT3G02260	BIG (BIG)	Calossin-like protein required for polar auxin transport. Involved in regulating sugar response and C/N balance.	Zm00001eb308350	-	Zn-binding protein Push	98.3872	168.073	23.6791	15.1705	4.81	Phytohormone action.auxin	-	0.350139
sbi-miR164.2	Sobic.003G395900	2.5	-1	1537	1556	UGGAGAAGCAGGGCACGUGC	.::::::.: :::::::::	CUACGUGCUCAGCUUCUCCA	Translation	LOC_Os01g68050;LOC_Os01g68050;LOC_Os01g68050;LOC_Os01g68050;LOC_Os01g68050;LOC_Os01g68050;LOC_Os01g68050;LOC_Os01g68050;LOC_Os01g68050	OsProT1#(LOC_Os01g68050);OsProT1#(LOC_Os01g68050);OsProT1#(LOC_Os01g68050);OsProT1#(LOC_Os01g68050);OsProT1#(LOC_Os01g68050);OsProT1#(LOC_Os01g68050);OsProT1#(LOC_Os01g68050);OsProT1#(LOC_Os01g68050);OsProT1#(LOC_Os01g68050)	qRT-PCR analyses suggested that OsProT1 was preferentially expressed in leaf sheathes during vegetative growth, while OsProT3 exhibited relatively high expression levels in several tissues, including nodes, panicles and roots.#(leaf#(OsProT1#(LOC_Os01g68050)));qRT-PCR analyses suggested that OsProT1 was preferentially expressed in leaf sheathes during vegetative growth, while OsProT3 exhibited re…	-	-	-	Zm00001eb144010	-	Proline transporter 1	0.0963562	0.183388	0.059874	0.022789	0	Amino acid metabolism;Solute transport	-	0.352471
sbi-miR164.2	Sobic.004G105200	4	-1	3389	3408	UGGAGAAGCAGGGCACGUGC	::::::: ::::.::: :.:	GCACGUGGCCUGUUUCACUA	Cleavage	LOC_Os02g14170	-	-	-	-	-	-	-	-	38.37	72.3446	61.6637	8.97637	13.6678	Enzyme classification	-	0.368882
sbi-miR164.2	Sobic.003G100700	4	-1	602	621	UGGAGAAGCAGGGCACGUGC	:::.::::: :::::::..	GCAUGUGCCAUGCUUCUUUU	Translation	LOC_Os01g02040	-	-	AT5G38560;AT1G68690	PROLINE-RICH EXTENSIN-LIKE RECEPTOR KINASE 8 (PERK8)#(AT5G38560);PROLINE-RICH EXTENSIN-LIKE RECEPTOR KINASE 9 (PERK9)#(AT1G68690)	Encodes a member of the proline-rich extensin-like receptor kinase (PERK) family. This family consists of 15 predicted receptor kinases (PMID: 15653807).#(AT5G38560);Encodes a member of the proline-rich extensin-like receptor kinase (PERK) family. This family consists of 15 predicted receptor kinases (PMID: 15653807).#(AT1G68690)	Zm00001eb126400	-	Proline-rich receptor-like protein kinase PERK8	42.7789	77.8319	34.7624	12.7077	1.60945	Enzyme classification;Protein modification	-	0.385902
sbi-miR164.2	Sobic.008G071400	1	-1	1175	1194	UGGAGAAGCAGGGCACGUGC	:: :::::::::::::::::	GCUCGUGCCCUGCUUCUCCA	Cleavage	LOC_Os06g23650;LOC_Os06g23650;LOC_Os06g23650;LOC_Os06g23650;LOC_Os06g23650;LOC_Os06g23650;LOC_Os06g23650;LOC_Os06g23650;LOC_Os06g23650	OsCUC1|OMTN5#(LOC_Os06g23650);OsCUC1|OMTN5#(LOC_Os06g23650);OsCUC1|OMTN5#(LOC_Os06g23650);OsCUC1|OMTN5#(LOC_Os06g23650);OsCUC1|OMTN5#(LOC_Os06g23650);OsCUC1|OMTN5#(LOC_Os06g23650);OsCUC1|OMTN5#(LOC_Os06g23650);OsCUC1|OMTN5#(LOC_Os06g23650);OsCUC1|OMTN5#(LOC_Os06g23650)	Further study indicated that OsCUC1 physically interacts with leaf-rolling related protein CURLED LEAF AND DWARF 1 (CLD1) and stabilizes it in the nucleus to control leaf morphology.#(leaf#(OsCUC1|OMTN5#(LOC_Os06g23650)));In addition, knockout of OsCUC1 leads to multiple defects, including dwarf plant architecture, male sterility and twisted-rolling leaves.#(sterility#(OsCUC1|OMTN5#(LOC_Os06g2365…	AT5G53950	CUP-SHAPED COTYLEDON 2 (CUC2)	Transcriptional activator of the NAC gene family, with CUC1 redundantly required for embryonic apical meristem formation, cotyledon separation and expression of STM. Proper timing of CUC2 expression is required to maintain the phyllotactic pattern initiated in the meristem. CUC2 expression in leaf sinus region is required for serration and the extent of serration is modulated by mir164A mediated …	Zm00001eb264380	-	Protein CUP-SHAPED COTYLEDON 2	0.0664683	0.0679248	0.0197044	0.0559197	0	RNA biosynthesis	NAC	0.416624
sbi-miR164.2	Sobic.001G118000	3	-1	77	96	UGGAGAAGCAGGGCACGUGC	:.::::::.: :::::::.	UCGCGUGCCUUUCUUCUCCG	Cleavage	-	-	-	AT1G49340	(ATPI4K ALPHA)	Encodes a phosphatidylinositol 4-kinase that is expressed in inflorescences and shoots.	Zm00001eb216400	LOC103625953	Phosphatidylinositol 4-kinase alpha 1	37.7323	52.4112	6.95749	3.81514	1.23276	Enzyme classification;Multi-process regulation	-	0.456459
sbi-miR164.2	Sobic.003G329400	2	-1	1537	1556	UGGAGAAGCAGGGCACGUGC	::. :::.:::::::::::	UCAUCUGCUCUGCUUCUCCA	Cleavage	LOC_Os01g59340	-	-	AT5G12200	PYRIMIDINE 2 (PYD2)	Encodes a protein with dihydropyrimidine amidohydrolase activity. It localizes to the secretory system and plays a role in uracil metabolism.	Zm00001eb150370	-	Dihydropyrimidinase	29.0976	35.5113	18.3175	17.0215	6.4661	Nucleotide metabolism	-	0.519613
sbi-miR164.2	Sobic.008G164800	1	-1	875	894	UGGAGAAGCAGGGCACGUGC	::: ::::::::::::::::	GCAGGUGCCCUGCUUCUCCA	Cleavage	LOC_Os12g41680;LOC_Os12g41680;LOC_Os12g41680;LOC_Os12g41680;LOC_Os12g41680;LOC_Os12g41680;LOC_Os12g41680;LOC_Os12g41680	OMTN3|OsNAC60#(LOC_Os12g41680);OMTN3|OsNAC60#(LOC_Os12g41680);OMTN3|OsNAC60#(LOC_Os12g41680);OMTN3|OsNAC60#(LOC_Os12g41680);OMTN3|OsNAC60#(LOC_Os12g41680);OMTN3|OsNAC60#(LOC_Os12g41680);OMTN3|OsNAC60#(LOC_Os12g41680);OMTN3|OsNAC60#(LOC_Os12g41680)	Overexpression of OMTN2, OMTN3, OMTN4, and OMTN6 in rice led to negative effects on drought resistance at the reproductive stage.#(drought resistance#(OMTN3|OsNAC60#(LOC_Os12g41680)));OsNAC60 encodes a transcription factor, over-expression of which enhanced defense responses, such as increased programmed cell death, greater ion leakage, more ROS accumulation and callose deposition, and up-regulat…	-	-	-	Zm00001eb135910	-	NAC domain-containing protein	5.29759	3.27827	5.5097	5.79035	0.0354764	RNA biosynthesis	NAC	0.522985
sbi-miR164.2	Sobic.003G306200	3.5	-1	1657	1676	UGGAGAAGCAGGGCACGUGC	:::.:::::.:::::.: :.	GCAUGUGCCUUGCUUUUACG	Cleavage	LOC_Os01g55880;LOC_Os08g07540	-;-	-;-	AT2G03390	(CLPF)	One of the two adaptors (together with CLPS1) that are part of the plastid CLP system. Interacts with chloroplast chaperone CLPC1, which unfolds and delivers substrates to the stromal CLPPRT protease complex for degradation.	Zm00001eb370310	-	YccV-like domain-containing protein	14.5217	18.1186	10.546	7.64689	2.57736	Protein homeostasis	-	0.551524
sbi-miR164.2	Sobic.009G216800	3.5	-1	977	996	UGGAGAAGCAGGGCACGUGC	:::.:::::::::: :::.	GCAUGUGCCCUGCUGCUCUC	Cleavage	-	-	-	AT5G47770;AT4G17190	FARNESYL DIPHOSPHATE SYNTHASE 1 (FPS1)#(AT5G47770);FARNESYL DIPHOSPHATE SYNTHASE 2 (FPS2)#(AT4G17190)	Encodes a protein with farnesyl diphosphate synthase activity.#(AT5G47770);Encodes a protein with farnesyl diphosphate synthase activity, which catalyzes the rate limiting step in isoprenoid biosynthesis. Its mRNA is most abundantly expressed in flowers.#(AT4G17190)	Zm00001eb342550	-	Farnesyl pyrophosphate synthase	136.908	162.426	168.848	80.2706	1.94189	Secondary metabolism	-	0.594789
sbi-miR164.2	Sobic.002G342300	3	-1	487	506	UGGAGAAGCAGGGCACGUGC	.::::::::: :::::::	CUACGUGCCCUUCUUCUCCU	Cleavage	LOC_Os07g37960	-	-	AT2G35100;AT5G44930	ARABINAN DEFICIENT 1 (ARAD1)#(AT2G35100);ARABINAN DEFICIENT 2 (ARAD2)#(AT5G44930)	Putative glycosyltransferase, similar to other CAZy Family 47 proteins. The protein is predicted to be a type 2 membrane protein with a signal anchor and is predicted to be targeted to the secretory pathway and to have a single transmembrane helix near the N terminus; hence, the protein has the features expected for a type II membrane protein targeted to the Golgi vesicles. The gene was shown to …	Zm00001eb324570	-	Exostosin domain-containing protein	7.03504	8.04262	7.14246	3.66529	2.33816	-	-	0.643144
sbi-miR164.2	Sobic.006G225700	2	-1	2325	2344	UGGAGAAGCAGGGCACGUGC	..::::::::::::::::	AGGUGUGCCCUGCUUCUCCA	Cleavage	-	-	-	-	-	-	-	-	-	0.605386	0.520884	0.0428316	0.0139387	0.0483576	Chromatin organisation	-	0.650562
sbi-miR164.2	Sobic.003G128500	3.5	-1	1125	1144	UGGAGAAGCAGGGCACGUGC	:::.:::.:: :.::::.::	GCAUGUGUCCAGUUUCUUCA	Translation	-	-	-	AT5G38390;AT3G58860;AT5G38396;AT1G52650;AT3G58820;AT3G58900;AT4G13960;AT3G58950;AT3G58910;AT5G38386;AT3G59000	-;-;-;-;-;-;-;-;-;-;-	F-box/RNI-like superfamily protein.#(AT5G38390);F-box/RNI-like superfamily protein.#(AT3G58860);F-box/RNI-like superfamily protein.#(AT5G38396);F-box/RNI superfamily protein.#(AT1G52650);F-box/RNI-like superfamily protein.#(AT3G58820);F-box/RNI-like superfamily protein.#(AT3G58900);F-box/RNI-like superfamily protein.#(AT4G13960);F-box/RNI-like superfamily protein.#(AT3G58950);F-box family protein…	Zm00001eb411850;Zm00001eb152580	-;-	FBD domain-containing protein.#(Zm00001eb411850);FBD domain-containing protein.#(Zm00001eb152580)	8.79192	4.79118	2.34576	1.10587	5.1315	-	-	0.656385
sbi-miR164.2	Sobic.001G529700	3	-1	1703	1722	UGGAGAAGCAGGGCACGUGC	: ::::::.:: ::::::::	GGACGUGCUCUCCUUCUCCA	Cleavage	LOC_Os03g02750	-	-	-	-	-	Zm00001eb403910	-	Subtilisin-like protease	258.507	261.317	93.8862	8.89113	40.7851	-	-	0.662187
sbi-miR164.2	Sobic.007G071000	2	-1	873	892	UGGAGAAGCAGGGCACGUGC	::: :::.:::::::::::.	GCAGGUGUCCUGCUUCUCCG	Cleavage	LOC_Os08g10080	OMTN6	Overexpression of OMTN2, OMTN3, OMTN4, and OMTN6 in rice led to negative effects on drought resistance at the reproductive stage.	-	-	-	Zm00001eb413540	-	NAC domain-containing protein	8.5233	7.44361	2.52178	3.00251	0.526694	RNA biosynthesis	NAC	0.68874
sbi-miR164.2	Sobic.004G078500	4	-1	3365	3384	UGGAGAAGCAGGGCACGUGC	:.:::::..::::: :::..	GUACGUGUUCUGCUGCUCUG	Cleavage	LOC_Os02g10110	-	-	-	-	-	Zm00001eb206050	-	Putative STRUBBELIG family receptor protein kinase	32.4228	30.014	8.86399	2.81823	0.50157	Enzyme classification;Protein modification	-	0.70061
sbi-miR164.2	Sobic.009G172300	2	-1	101	120	UGGAGAAGCAGGGCACGUGC	:::.::::::: ::::::::	GCAUGUGCCCUUCUUCUCCA	Cleavage	-	-	-	-	-	-	-	-	-	6.92816	4.40568	0.0142829	0.0587136	0	-	-	0.740883
sbi-miR164.2	Sobic.003G436000	3	-1	1171	1190	UGGAGAAGCAGGGCACGUGC	:.::::::::::.::.::.	GUACGUGCCCUGUUUUUCUU	Cleavage	-	-	-	-	-	-	-	-	-	6.07142	5.86767	4.61474	1.71051	0.669449	-	-	0.767906
sbi-miR164.2	Sobic.007G105500	2.5	-1	282	301	UGGAGAAGCAGGGCACGUGC	::.: ::::::::::::::	GCGCCUGCCCUGCUUCUCCC	Cleavage	LOC_Os04g23890;LOC_Os04g23890;LOC_Os04g23890	OsNPH1b#(LOC_Os04g23890);OsNPH1b#(LOC_Os04g23890);OsNPH1b#(LOC_Os04g23890)	Northern blot analysis showed that OsNPH1a was strongly expressed in coleoptiles, whereas OsNPH1b was highly expressed in leaves of dark-grown rice seedlings.#(seedlings#(OsNPH1b#(LOC_Os04g23890)));When the dark-grown seedlings were transferred to the continuous white light, the abundance of the OsNPH1a transcript in coleoptiles rapidly declined to the minimum levels, whereas the OsNPH1b transcri…	AT5G58140	PHOTOTROPIN 2 (PHOT2)	Membrane-bound protein serine/threonine kinase that functions as blue light photoreceptor in redundancy with PHO1. Involved in stomatal opening, chloroplast movement and phototropism. Mediates blue light-induced growth enhancements. PHOT1 and PHOT2 mediate blue light-dependent activation of the plasma membrane H+-ATPase in guard cell protoplasts. PHOT2 possesses two LOV (LOV1 and LOV2, for light-…	Zm00001eb042710	-	Putative LOV domain-containing protein	1.24699	0.701977	0.086839	0.0446452	0.0348193	Enzyme classification;External stimuli response;Protein modification	-	0.795383
sbi-miR164.2	Sobic.003G362400	3	-1	71	90	UGGAGAAGCAGGGCACGUGC	::.:::::::::: :::::	GCGCGUGCCCUGCCUCUCCC	Cleavage	LOC_Os01g63890;LOC_Os04g55290	-;-	-;-	AT4G21110	-	G10 family protein.	Zm00001eb366930;Zm00001eb366990	-;-	G10 domain-containing protein.#(Zm00001eb366930);G10 domain-containing protein.#(Zm00001eb366990)	79.7527	63.1455	36.0291	28.0291	24.6685	RNA processing	-	0.796928
sbi-miR164.2	Sobic.002G168000	2.5	-1	167	187	UGGAGAAGCAGGGCA-CGUGC	::::: ::::::::::::::.	GCACGGUGCCCUGCUUCUCCG	Cleavage	LOC_Os09g14880;LOC_Os09g14960	-;-	-;-	-	-	-	-	-	-	17.7969	11.1018	4.9662	4.46439	2.49512	-	-	0.833141
sbi-miR164.3	Sobic.004G239750	3.5	-1	221	241	UGGAGAAGCAGGGCACGUGCA	:::.:::...:::: :::::	CGCAUGUGUUUUGCUCCUCCA	Cleavage	-	-	-	-	-	-	-	-	-	0.492091	0.228309	0.827251	1.10606	1.15398	-	-	-0.645624
sbi-miR164.3	Sobic.005G088600	5	-1	369	389	UGGAGAAGCAGGGCACGUGCA	::::::::.::::: :.::	UGCACGUGUCCUGCGUUUCAU	Cleavage	-	-	-	-	-	-	-	-	-	0.0746551	0.145072	0.0282455	0.656877	1.68834	-	-	-0.577977
sbi-miR164.3	Sobic.003G087600	2.5	-1	1171	1191	UGGAGAAGCAGGGCACGUGCA	:: :::::::::::::::.	CGCCGGUGCCCUGCUUCUCCG	Cleavage	LOC_Os01g03720;LOC_Os01g03720;LOC_Os01g03720;LOC_Os01g03720;LOC_Os01g03720;LOC_Os01g03720;LOC_Os01g03720;LOC_Os01g03720;LOC_Os01g03720;LOC_Os01g03720;LOC_Os01g03720;LOC_Os01g03720;LOC_Os01g03720;LOC_Os01g03720;LOC_Os01g03720	MYB1#(LOC_Os01g03720);MYB1#(LOC_Os01g03720);MYB1#(LOC_Os01g03720);MYB1#(LOC_Os01g03720);MYB1#(LOC_Os01g03720);MYB1#(LOC_Os01g03720);MYB1#(LOC_Os01g03720);MYB1#(LOC_Os01g03720);MYB1#(LOC_Os01g03720);MYB1#(LOC_Os01g03720);MYB1#(LOC_Os01g03720);MYB1#(LOC_Os01g03720);MYB1#(LOC_Os01g03720);MYB1#(LOC_Os01g03720);MYB1#(LOC_Os01g03720)	MYB1 was transcriptionally induced in leaf sheaths and old leaf blades.#(leaf#(MYB1#(LOC_Os01g03720)));Furthermore, MYB1 affected the elongation of the primary root in a Pi-dependent manner and lateral roots in a Pi-independent manner.#(root#(MYB1#(LOC_Os01g03720)));Moreover, gibberellic acid (GA)-triggered lateral root elongation was largely suppressed in wild-type plants under Pi starvation con…	-	-	-	Zm00001eb335060	-	transcription factor MYB62	2.27405	2.54908	8.39333	8.49956	1.07761	RNA biosynthesis	MYB	-0.355261
sbi-miR164.3	Sobic.006G107400	2	-1	871	891	UGGAGAAGCAGGGCACGUGCA	:::::: :::::::::::.	CACACGUGACCUGCUUCUCCG	Cleavage	LOC_Os04g38720;LOC_Os04g38720;LOC_Os04g38720;LOC_Os04g38720;LOC_Os04g38720;LOC_Os04g38720;LOC_Os04g38720;LOC_Os04g38720;LOC_Os04g38720;LOC_Os04g38720;LOC_Os04g38720;LOC_Os04g38720;LOC_Os04g38720;LOC_Os04g38720;LOC_Os04g38720;LOC_Os04g38720;LOC_Os04g38720;LOC_Os04g38720;LOC_Os04g38720;LOC_Os04g38720;LOC_Os04g38720;LOC_Os04g38720;LOC_Os04g38720;LOC_Os04g38720;LOC_Os04g38720;LOC_Os04g38720;LOC_Os04g…	OsNAC2|OsTIL1|OMTN2|OsORE1#(LOC_Os04g38720);OsNAC2|OsTIL1|OMTN2|OsORE1#(LOC_Os04g38720);OsNAC2|OsTIL1|OMTN2|OsORE1#(LOC_Os04g38720);OsNAC2|OsTIL1|OMTN2|OsORE1#(LOC_Os04g38720);OsNAC2|OsTIL1|OMTN2|OsORE1#(LOC_Os04g38720);OsNAC2|OsTIL1|OMTN2|OsORE1#(LOC_Os04g38720);OsNAC2|OsTIL1|OMTN2|OsORE1#(LOC_Os04g38720);OsNAC2|OsTIL1|OMTN2|OsORE1#(LOC_Os04g38720);OsNAC2|OsTIL1|OMTN2|OsORE1#(LOC_Os04g38720);OsN…	Overexpression of OsNAC2 regulates shoot branching in rice.#(branching#(OsNAC2|OsTIL1|OMTN2|OsORE1#(LOC_Os04g38720)));Overexpression of OsNAC2 contributes tiller bud outgrowth, but does not affect tiller bud initiation.#(tiller#(OsNAC2|OsTIL1|OMTN2|OsORE1#(LOC_Os04g38720)));Here, an activation-tagging mutant Ostil1 (Oryza sativa tillering1) was characterized, which showed increased tillers, enlar…	AT3G29035;AT5G07680;AT5G61430;AT5G39610	NAC DOMAIN CONTAINING PROTEIN 3 (NAC3)#(AT3G29035);NAC DOMAIN CONTAINING PROTEIN 80 (NAC080)#(AT5G07680);NAC DOMAIN CONTAINING PROTEIN 100 (NAC100)#(AT5G61430);NAC DOMAIN CONTAINING PROTEIN 6 (NAC6)#(AT5G39610)	Encodes a protein with transcription factor activity. Note: this protein (AT3G29035) on occasion has also been referred to as AtNAC3, not to be confused with the AtNAC3 found at locus AT3G15500. The mRNA is cell-to-cell mobile.#(AT3G29035);NAC domain containing protein 80.#(AT5G07680);(NAC) domain transcription factor; regulated at both transcriptional and post-transcriptional levels under Fe-def…	Zm00001eb080700	-	NAC domain-containing protein 79	18.1199	169.985	187.634	101.544	4.8287	RNA biosynthesis	NAC	-0.255351
sbi-miR164.3	Sobic.004G191700	1.5	-1	1082	1102	UGGAGAAGCAGGGCACGUGCA	:::::: ::::::::::::	CACACGUGACCUGCUUCUCCA	Cleavage	LOC_Os02g36880	OMTN1	Under cold stress, the expression levels of OMTN1 and OMTN2 were increased, while the expression levels of the other three genes (OMTN3, OMTN4, and OMTN6) did not change significantly.	AT3G29035;AT5G07680;AT5G61430;AT5G39610	NAC DOMAIN CONTAINING PROTEIN 3 (NAC3)#(AT3G29035);NAC DOMAIN CONTAINING PROTEIN 80 (NAC080)#(AT5G07680);NAC DOMAIN CONTAINING PROTEIN 100 (NAC100)#(AT5G61430);NAC DOMAIN CONTAINING PROTEIN 6 (NAC6)#(AT5G39610)	Encodes a protein with transcription factor activity. Note: this protein (AT3G29035) on occasion has also been referred to as AtNAC3, not to be confused with the AtNAC3 found at locus AT3G15500. The mRNA is cell-to-cell mobile.#(AT3G29035);NAC domain containing protein 80.#(AT5G07680);(NAC) domain transcription factor; regulated at both transcriptional and post-transcriptional levels under Fe-def…	Zm00001eb245030	-	NAC domain-containing protein	4.06367	22.8272	33.9661	14.2619	1.2668	RNA biosynthesis	NAC	-0.21373
sbi-miR164.3	Sobic.010G052700	3.5	-1	283	303	UGGAGAAGCAGGGCACGUGCA	::..:::::.:: :::::::.	UGUGCGUGCUCUCCUUCUCCG	Cleavage	LOC_Os06g07040;LOC_Os06g07040	OsIAA20#(LOC_Os06g07040);OsIAA20#(LOC_Os06g07040)	Knockout of OsbZIP49 led to reduced expression of both OsGH3-2 and OsGH3-13 within the shoot base, and increased accumulation of IAA and increased OsIAA20 expression levels were observed in transformants following gravistimulation.#(shoot#(OsIAA20#(LOC_Os06g07040)));Knockout of OsbZIP49 led to reduced expression of both OsGH3-2 and OsGH3-13 within the shoot base, and increased accumulation of IAA…	-	-	-	Zm00001eb271530	-	Auxin-responsive protein IAA20	0.119183	31.8526	3.77891	2.70218	4.4931	Phytohormone action.auxin	-	-0.10199
sbi-miR164.3	Sobic.009G207500	3.5	-1	1917	1937	UGGAGAAGCAGGGCACGUGCA	.:::::::.::::::::	CUUACGUGCCUUGCUUCUCAG	Cleavage	-	-	-	AT1G32660;AT1G30790;AT5G22791;AT3G47150;AT1G70960;AT1G70380;AT1G70970	-;-;-;-;-;-;-	F-box and associated interaction domains-containing protein.#(AT1G32660);F-box and associated interaction domains-containing protein.#(AT1G30790);F-box family protein.#(AT5G22791);F-box and associated interaction domains-containing protein.#(AT3G47150);F-box and associated interaction domains-containing protein.#(AT1G70960);F-box and associated interaction domains-containing protein.#(AT1G70380);…	-	-	-	8.67754	2.97619	18.3084	11.7453	3.52879	-	-	-0.0253364
sbi-miR164.3	Sobic.002G414850	2.5	-1	579	599	UGGAGAAGCAGGGCACGUGCA	:::::::..:: ::::::::	CGCACGUGUUCUCCUUCUCCA	Cleavage	-	-	-	-	-	-	-	-	-	0.0458444	1.10546	0	0	0	-	-	0.0500557
sbi-miR164.3	Sobic.010G227300	1	-1	993	1013	UGGAGAAGCAGGGCACGUGCA	::: ::::::::::::::::	AGCAAGUGCCCUGCUUCUCCA	Cleavage	LOC_Os06g46270;LOC_Os06g46270;LOC_Os06g46270;LOC_Os06g46270;LOC_Os06g46270;LOC_Os06g46270;LOC_Os06g46270;LOC_Os06g46270;LOC_Os06g46270;LOC_Os06g46270;LOC_Os06g46270;LOC_Os06g46270;LOC_Os06g46270;LOC_Os06g46270;LOC_Os06g46270	OMTN4|ONAC011|OsY37#(LOC_Os06g46270);OMTN4|ONAC011|OsY37#(LOC_Os06g46270);OMTN4|ONAC011|OsY37#(LOC_Os06g46270);OMTN4|ONAC011|OsY37#(LOC_Os06g46270);OMTN4|ONAC011|OsY37#(LOC_Os06g46270);OMTN4|ONAC011|OsY37#(LOC_Os06g46270);OMTN4|ONAC011|OsY37#(LOC_Os06g46270);OMTN4|ONAC011|OsY37#(LOC_Os06g46270);OMTN4|ONAC011|OsY37#(LOC_Os06g46270);OMTN4|ONAC011|OsY37#(LOC_Os06g46270);OMTN4|ONAC011|OsY37#(LOC_Os06…	Overexpression of OMTN2, OMTN3, OMTN4, and OMTN6 in rice led to negative effects on drought resistance at the reproductive stage.#(drought resistance#(OMTN4|ONAC011|OsY37#(LOC_Os06g46270)));The NAC Transcription Factor Gene OsY37 (ONAC011) Promotes Leaf Senescence and Accelerates Heading Time in Rice.#(leaf#(OMTN4|ONAC011|OsY37#(LOC_Os06g46270)));The NAC Transcription Factor Gene OsY37 (ONAC011) …	AT3G12977;AT1G56010	NAC1 LIKE (NAC1L)#(AT3G12977);NAC DOMAIN CONTAINING PROTEIN 1 (NAC1)#(AT1G56010)	NAC transcription regulator. Regulates endosperm cell expansion during germination.#(AT3G12977);Encodes a transcription factor involved auxin-mediated lateral root formation. Acts downstream of TIR1 and is regulated post-transcriptionally by miRNA164 and by SINAT5-dependent ubiquitination.#(AT1G56010)	Zm00001eb224800	-	NAC domain-containing protein	9.92299	29.4599	8.7764	10.4496	0.401491	RNA biosynthesis	NAC	0.169233
sbi-miR164.3	Sobic.002G199200	3	-1	905	925	UGGAGAAGCAGGGCACGUGCA	::::::: :::::::::::	AGCACGUGAACUGCUUCUCCA	Cleavage	LOC_Os09g24560	-	-	-	-	-	-	-	-	0.0204033	0.122422	0	0	0	-	NAC	0.172339
sbi-miR164.3	Sobic.008G164800	1	-1	874	894	UGGAGAAGCAGGGCACGUGCA	::: ::::::::::::::::	AGCAGGUGCCCUGCUUCUCCA	Cleavage	LOC_Os12g41680;LOC_Os12g41680;LOC_Os12g41680;LOC_Os12g41680;LOC_Os12g41680;LOC_Os12g41680;LOC_Os12g41680;LOC_Os12g41680	OMTN3|OsNAC60#(LOC_Os12g41680);OMTN3|OsNAC60#(LOC_Os12g41680);OMTN3|OsNAC60#(LOC_Os12g41680);OMTN3|OsNAC60#(LOC_Os12g41680);OMTN3|OsNAC60#(LOC_Os12g41680);OMTN3|OsNAC60#(LOC_Os12g41680);OMTN3|OsNAC60#(LOC_Os12g41680);OMTN3|OsNAC60#(LOC_Os12g41680)	Overexpression of OMTN2, OMTN3, OMTN4, and OMTN6 in rice led to negative effects on drought resistance at the reproductive stage.#(drought resistance#(OMTN3|OsNAC60#(LOC_Os12g41680)));OsNAC60 encodes a transcription factor, over-expression of which enhanced defense responses, such as increased programmed cell death, greater ion leakage, more ROS accumulation and callose deposition, and up-regulat…	-	-	-	Zm00001eb135910	-	NAC domain-containing protein	5.29759	3.27827	5.5097	5.79035	0.0354764	RNA biosynthesis	NAC	0.354013
sbi-miR164.3	Sobic.001G459700	4	-1	482	503	UGGAGAAGCAGGGCACG-UGCA	:::: :::::.::::: :::::	UGCAGCGUGCUCUGCUGCUCCA	Cleavage	LOC_Os03g11350	-	-	-	-	-	-	-	-	0.0661794	0.174816	0.0461156	0	0	Enzyme classification	-	0.366554
sbi-miR164.3	Sobic.003G395900	2.5	-1	1536	1556	UGGAGAAGCAGGGCACGUGCA	.::::::.: :::::::::	CCUACGUGCUCAGCUUCUCCA	Translation	LOC_Os01g68050;LOC_Os01g68050;LOC_Os01g68050;LOC_Os01g68050;LOC_Os01g68050;LOC_Os01g68050;LOC_Os01g68050;LOC_Os01g68050;LOC_Os01g68050	OsProT1#(LOC_Os01g68050);OsProT1#(LOC_Os01g68050);OsProT1#(LOC_Os01g68050);OsProT1#(LOC_Os01g68050);OsProT1#(LOC_Os01g68050);OsProT1#(LOC_Os01g68050);OsProT1#(LOC_Os01g68050);OsProT1#(LOC_Os01g68050);OsProT1#(LOC_Os01g68050)	qRT-PCR analyses suggested that OsProT1 was preferentially expressed in leaf sheathes during vegetative growth, while OsProT3 exhibited relatively high expression levels in several tissues, including nodes, panicles and roots.#(leaf#(OsProT1#(LOC_Os01g68050)));qRT-PCR analyses suggested that OsProT1 was preferentially expressed in leaf sheathes during vegetative growth, while OsProT3 exhibited re…	-	-	-	Zm00001eb144010	-	Proline transporter 1	0.0963562	0.183388	0.059874	0.022789	0	Amino acid metabolism;Solute transport	-	0.472176
sbi-miR164.3	Sobic.009G216800	3.5	-1	976	996	UGGAGAAGCAGGGCACGUGCA	::::.:::::::::: :::.	UGCAUGUGCCCUGCUGCUCUC	Cleavage	-	-	-	AT5G47770;AT4G17190	FARNESYL DIPHOSPHATE SYNTHASE 1 (FPS1)#(AT5G47770);FARNESYL DIPHOSPHATE SYNTHASE 2 (FPS2)#(AT4G17190)	Encodes a protein with farnesyl diphosphate synthase activity.#(AT5G47770);Encodes a protein with farnesyl diphosphate synthase activity, which catalyzes the rate limiting step in isoprenoid biosynthesis. Its mRNA is most abundantly expressed in flowers.#(AT4G17190)	Zm00001eb342550	-	Farnesyl pyrophosphate synthase	136.908	162.426	168.848	80.2706	1.94189	Secondary metabolism	-	0.487964
sbi-miR164.3	Sobic.007G098500	4.5	-1	4076	4096	UGGAGAAGCAGGGCACGUGCA	:: :.:::::::::::.::	UGGAUGUGCCCUGCUUUUCAU	Cleavage	LOC_Os09g07300	-	-	AT3G02260	BIG (BIG)	Calossin-like protein required for polar auxin transport. Involved in regulating sugar response and C/N balance.	Zm00001eb308350	-	Zn-binding protein Push	98.3872	168.073	23.6791	15.1705	4.81	Phytohormone action.auxin	-	0.533196
sbi-miR164.3	Sobic.008G071400	1	-1	1174	1194	UGGAGAAGCAGGGCACGUGCA	:: :::::::::::::::::	AGCUCGUGCCCUGCUUCUCCA	Cleavage	LOC_Os06g23650;LOC_Os06g23650;LOC_Os06g23650;LOC_Os06g23650;LOC_Os06g23650;LOC_Os06g23650;LOC_Os06g23650;LOC_Os06g23650;LOC_Os06g23650	OsCUC1|OMTN5#(LOC_Os06g23650);OsCUC1|OMTN5#(LOC_Os06g23650);OsCUC1|OMTN5#(LOC_Os06g23650);OsCUC1|OMTN5#(LOC_Os06g23650);OsCUC1|OMTN5#(LOC_Os06g23650);OsCUC1|OMTN5#(LOC_Os06g23650);OsCUC1|OMTN5#(LOC_Os06g23650);OsCUC1|OMTN5#(LOC_Os06g23650);OsCUC1|OMTN5#(LOC_Os06g23650)	Further study indicated that OsCUC1 physically interacts with leaf-rolling related protein CURLED LEAF AND DWARF 1 (CLD1) and stabilizes it in the nucleus to control leaf morphology.#(leaf#(OsCUC1|OMTN5#(LOC_Os06g23650)));In addition, knockout of OsCUC1 leads to multiple defects, including dwarf plant architecture, male sterility and twisted-rolling leaves.#(sterility#(OsCUC1|OMTN5#(LOC_Os06g2365…	AT5G53950	CUP-SHAPED COTYLEDON 2 (CUC2)	Transcriptional activator of the NAC gene family, with CUC1 redundantly required for embryonic apical meristem formation, cotyledon separation and expression of STM. Proper timing of CUC2 expression is required to maintain the phyllotactic pattern initiated in the meristem. CUC2 expression in leaf sinus region is required for serration and the extent of serration is modulated by mir164A mediated …	Zm00001eb264380	-	Protein CUP-SHAPED COTYLEDON 2	0.0664683	0.0679248	0.0197044	0.0559197	0	RNA biosynthesis	NAC	0.54711
sbi-miR164.3	Sobic.002G342300	3	-1	486	506	UGGAGAAGCAGGGCACGUGCA	: .::::::::: :::::::	UCUACGUGCCCUUCUUCUCCU	Cleavage	LOC_Os07g37960	-	-	AT2G35100;AT5G44930	ARABINAN DEFICIENT 1 (ARAD1)#(AT2G35100);ARABINAN DEFICIENT 2 (ARAD2)#(AT5G44930)	Putative glycosyltransferase, similar to other CAZy Family 47 proteins. The protein is predicted to be a type 2 membrane protein with a signal anchor and is predicted to be targeted to the secretory pathway and to have a single transmembrane helix near the N terminus; hence, the protein has the features expected for a type II membrane protein targeted to the Golgi vesicles. The gene was shown to …	Zm00001eb324570	-	Exostosin domain-containing protein	7.03504	8.04262	7.14246	3.66529	2.33816	-	-	0.60403
sbi-miR164.3	Sobic.003G306200	3.5	-1	1656	1676	UGGAGAAGCAGGGCACGUGCA	::::.:::::.:::::.: :.	UGCAUGUGCCUUGCUUUUACG	Cleavage	LOC_Os01g55880;LOC_Os08g07540	-;-	-;-	AT2G03390	(CLPF)	One of the two adaptors (together with CLPS1) that are part of the plastid CLP system. Interacts with chloroplast chaperone CLPC1, which unfolds and delivers substrates to the stromal CLPPRT protease complex for degradation.	Zm00001eb370310	-	YccV-like domain-containing protein	14.5217	18.1186	10.546	7.64689	2.57736	Protein homeostasis	-	0.61934
sbi-miR164.3	Sobic.003G329400	2	-1	1536	1556	UGGAGAAGCAGGGCACGUGCA	::. :::.:::::::::::	CUCAUCUGCUCUGCUUCUCCA	Cleavage	LOC_Os01g59340	-	-	AT5G12200	PYRIMIDINE 2 (PYD2)	Encodes a protein with dihydropyrimidine amidohydrolase activity. It localizes to the secretory system and plays a role in uracil metabolism.	Zm00001eb150370	-	Dihydropyrimidinase	29.0976	35.5113	18.3175	17.0215	6.4661	Nucleotide metabolism	-	0.624522
sbi-miR164.3	Sobic.003G436000	3	-1	1170	1190	UGGAGAAGCAGGGCACGUGCA	::.::::::::::.::.::.	UGUACGUGCCCUGUUUUUCUU	Cleavage	-	-	-	-	-	-	-	-	-	6.07142	5.86767	4.61474	1.71051	0.669449	-	-	0.77018
sbi-miR164.3	Sobic.001G529700	3	-1	1702	1722	UGGAGAAGCAGGGCACGUGCA	:: ::::::.:: ::::::::	UGGACGUGCUCUCCUUCUCCA	Cleavage	LOC_Os03g02750	-	-	-	-	-	Zm00001eb403910	-	Subtilisin-like protease	258.507	261.317	93.8862	8.89113	40.7851	-	-	0.799728
sbi-miR164.3	Sobic.003G128500	3.5	-1	1124	1144	UGGAGAAGCAGGGCACGUGCA	:::.:::.:: :.::::.::	AGCAUGUGUCCAGUUUCUUCA	Translation	-	-	-	AT5G38390;AT3G58860;AT5G38396;AT1G52650;AT3G58820;AT3G58900;AT4G13960;AT3G58950;AT3G58910;AT5G38386;AT3G59000	-;-;-;-;-;-;-;-;-;-;-	F-box/RNI-like superfamily protein.#(AT5G38390);F-box/RNI-like superfamily protein.#(AT3G58860);F-box/RNI-like superfamily protein.#(AT5G38396);F-box/RNI superfamily protein.#(AT1G52650);F-box/RNI-like superfamily protein.#(AT3G58820);F-box/RNI-like superfamily protein.#(AT3G58900);F-box/RNI-like superfamily protein.#(AT4G13960);F-box/RNI-like superfamily protein.#(AT3G58950);F-box family protein…	Zm00001eb411850;Zm00001eb152580	-;-	FBD domain-containing protein.#(Zm00001eb411850);FBD domain-containing protein.#(Zm00001eb152580)	8.79192	4.79118	2.34576	1.10587	5.1315	-	-	0.826979
sbi-miR164.3	Sobic.007G071000	2	-1	872	892	UGGAGAAGCAGGGCACGUGCA	::: :::.:::::::::::.	AGCAGGUGUCCUGCUUCUCCG	Cleavage	LOC_Os08g10080	OMTN6	Overexpression of OMTN2, OMTN3, OMTN4, and OMTN6 in rice led to negative effects on drought resistance at the reproductive stage.	-	-	-	Zm00001eb413540	-	NAC domain-containing protein	8.5233	7.44361	2.52178	3.00251	0.526694	RNA biosynthesis	NAC	0.827145
sbi-miR164.3	Sobic.004G078500	4	-1	3364	3384	UGGAGAAGCAGGGCACGUGCA	::.:::::..::::: :::..	UGUACGUGUUCUGCUGCUCUG	Cleavage	LOC_Os02g10110	-	-	-	-	-	Zm00001eb206050	-	Putative STRUBBELIG family receptor protein kinase	32.4228	30.014	8.86399	2.81823	0.50157	Enzyme classification;Protein modification	-	0.835649
sbi-miR164.3	Sobic.006G225700	2	-1	2324	2344	UGGAGAAGCAGGGCACGUGCA	..::::::::::::::::	AAGGUGUGCCCUGCUUCUCCA	Cleavage	-	-	-	-	-	-	-	-	-	0.605386	0.520884	0.0428316	0.0139387	0.0483576	Chromatin organisation	-	0.837026
sbi-miR164.3	Sobic.003G352800	3.5	-1	373	393	UGGAGAAGCAGGGCACGUGCA	::: :::::.:: :::::::.	UGCUCGUGCUCUUCUUCUCCG	Cleavage	LOC_Os01g62490	-	-	AT5G60020	LACCASE 17 (LAC17)	LAC17 appears to have laccase activity based on enzyme assays performed using lac17 mutants. Notably, these mutants appear to have a reduced deposition of G lignin units. LAC17 is expressed in interfascicular fibers and likely contributes to lignin biosynthesis, and hence, cell wall biosynthesis, there.	Zm00001eb148270	-	Laccase	0.269859	0.17963	0	0	0	-	-	0.900457
sbi-miR164.3	Sobic.009G172300	2	-1	100	120	UGGAGAAGCAGGGCACGUGCA	::::.::::::: ::::::::	UGCAUGUGCCCUUCUUCUCCA	Cleavage	-	-	-	-	-	-	-	-	-	6.92816	4.40568	0.0142829	0.0587136	0	-	-	0.909894
sbi-miR164.3	Sobic.002G394400	4.5	-1	2254	2274	UGGAGAAGCAGGGCACGUGCA	:::.: ::::::::::.::	UGCGCCUGCCCUGCUUUUCAG	Cleavage	LOC_Os07g44820	-	-	-	-	-	Zm00001eb110330	-	TFIIS N-terminal domain-containing protein	90.2805	74.9101	51.2073	42.4845	53.1536	RNA biosynthesis	-	0.909957
sbi-miR164.3	Sobic.003G362400	3	-1	70	90	UGGAGAAGCAGGGCACGUGCA	::.:::::::::: :::::	GGCGCGUGCCCUGCCUCUCCC	Cleavage	LOC_Os01g63890;LOC_Os04g55290	-;-	-;-	AT4G21110	-	G10 family protein.	Zm00001eb366930;Zm00001eb366990	-;-	G10 domain-containing protein.#(Zm00001eb366930);G10 domain-containing protein.#(Zm00001eb366990)	79.7527	63.1455	36.0291	28.0291	24.6685	RNA processing	-	0.921828
sbi-miR164.3	Sobic.003G273300	3.5	-1	327	347	UGGAGAAGCAGGGCACGUGCA	::::: ::.::::::::::	UGCACAAGCUCUGCUUCUCCC	Cleavage	LOC_Os01g51154	OsTRBF3	Identification and characterization of three telomere repeat-binding factors in rice.	AT1G72740;AT1G17520	-;-	Single Myb Histone (SMH) gene family member. Contains terminal acidic SANT domain.#(AT1G72740);Single Myb Histone (SMH) gene family member. Contains terminal acidic SANT domain.#(AT1G17520)	Zm00001eb361200;Zm00001eb155280	-;-	Homeodomain-like/winged-helix DNA-binding family protein.#(Zm00001eb361200);Homeodomain-like/winged-helix DNA-binding family protein.#(Zm00001eb155280)	26.8179	19.1798	12.0588	8.45498	13.3385	-	MYB_related	0.93159
sbi-miR164.3	Sobic.007G105500	2.5	-1	281	301	UGGAGAAGCAGGGCACGUGCA	::.: ::::::::::::::	GGCGCCUGCCCUGCUUCUCCC	Cleavage	LOC_Os04g23890;LOC_Os04g23890;LOC_Os04g23890	OsNPH1b#(LOC_Os04g23890);OsNPH1b#(LOC_Os04g23890);OsNPH1b#(LOC_Os04g23890)	Northern blot analysis showed that OsNPH1a was strongly expressed in coleoptiles, whereas OsNPH1b was highly expressed in leaves of dark-grown rice seedlings.#(seedlings#(OsNPH1b#(LOC_Os04g23890)));When the dark-grown seedlings were transferred to the continuous white light, the abundance of the OsNPH1a transcript in coleoptiles rapidly declined to the minimum levels, whereas the OsNPH1b transcri…	AT5G58140	PHOTOTROPIN 2 (PHOT2)	Membrane-bound protein serine/threonine kinase that functions as blue light photoreceptor in redundancy with PHO1. Involved in stomatal opening, chloroplast movement and phototropism. Mediates blue light-induced growth enhancements. PHOT1 and PHOT2 mediate blue light-dependent activation of the plasma membrane H+-ATPase in guard cell protoplasts. PHOT2 possesses two LOV (LOV1 and LOV2, for light-…	Zm00001eb042710	-	Putative LOV domain-containing protein	1.24699	0.701977	0.086839	0.0446452	0.0348193	Enzyme classification;External stimuli response;Protein modification	-	0.943927
sbi-miR164.3	Sobic.002G168000	2.5	-1	166	187	UGGAGAAGCAGGGCA-CGUGCA	::::: ::::::::::::::.	GGCACGGUGCCCUGCUUCUCCG	Cleavage	LOC_Os09g14880;LOC_Os09g14960	-;-	-;-	-	-	-	-	-	-	17.7969	11.1018	4.9662	4.46439	2.49512	-	-	0.953655
sbi-miR164.4	Sobic.004G105200	4	-1	3388	3408	UGGAGAAGCAGGGCACGUGCU	.::::::: ::::.::: :.:	GGCACGUGGCCUGUUUCACUA	Cleavage	LOC_Os02g14170	-	-	-	-	-	-	-	-	38.37	72.3446	61.6637	8.97637	13.6678	Enzyme classification	-	-0.798565
sbi-miR164.4	Sobic.001G529700	3	-1	1702	1722	UGGAGAAGCAGGGCACGUGCU	: ::::::.:: ::::::::	UGGACGUGCUCUCCUUCUCCA	Cleavage	LOC_Os03g02750	-	-	-	-	-	Zm00001eb403910	-	Subtilisin-like protease	258.507	261.317	93.8862	8.89113	40.7851	-	-	-0.750116
sbi-miR164.4	Sobic.003G436000	3	-1	1170	1190	UGGAGAAGCAGGGCACGUGCU	:.::::::::::.::.::.	UGUACGUGCCCUGUUUUUCUU	Cleavage	-	-	-	-	-	-	-	-	-	6.07142	5.86767	4.61474	1.71051	0.669449	-	-	-0.745999
sbi-miR164.4	Sobic.002G342300	3	-1	486	506	UGGAGAAGCAGGGCACGUGCU	.::::::::: :::::::	UCUACGUGCCCUUCUUCUCCU	Cleavage	LOC_Os07g37960	-	-	AT2G35100;AT5G44930	ARABINAN DEFICIENT 1 (ARAD1)#(AT2G35100);ARABINAN DEFICIENT 2 (ARAD2)#(AT5G44930)	Putative glycosyltransferase, similar to other CAZy Family 47 proteins. The protein is predicted to be a type 2 membrane protein with a signal anchor and is predicted to be targeted to the secretory pathway and to have a single transmembrane helix near the N terminus; hence, the protein has the features expected for a type II membrane protein targeted to the Golgi vesicles. The gene was shown to …	Zm00001eb324570	-	Exostosin domain-containing protein	7.03504	8.04262	7.14246	3.66529	2.33816	-	-	-0.731682
sbi-miR164.4	Sobic.004G263300	4	-1	233	253	UGGAGAAGCAGGGCACGUGCU	:::: ::::.: ::::::::	AGCAGGUGCUCCGCUUCUCCU	Translation	LOC_Os02g48122	-	-	-	-	-	Zm00001eb252430	-	Pentatricopeptide repeat-containing protein	37.1297	27.268	20.7732	11.5393	8.25733	-	-	-0.686822
sbi-miR164.4	Sobic.003G100700	4	-1	601	621	UGGAGAAGCAGGGCACGUGCU	.:::.::::: :::::::..	GGCAUGUGCCAUGCUUCUUUU	Translation	LOC_Os01g02040	-	-	AT5G38560;AT1G68690	PROLINE-RICH EXTENSIN-LIKE RECEPTOR KINASE 8 (PERK8)#(AT5G38560);PROLINE-RICH EXTENSIN-LIKE RECEPTOR KINASE 9 (PERK9)#(AT1G68690)	Encodes a member of the proline-rich extensin-like receptor kinase (PERK) family. This family consists of 15 predicted receptor kinases (PMID: 15653807).#(AT5G38560);Encodes a member of the proline-rich extensin-like receptor kinase (PERK) family. This family consists of 15 predicted receptor kinases (PMID: 15653807).#(AT1G68690)	Zm00001eb126400	-	Proline-rich receptor-like protein kinase PERK8	42.7789	77.8319	34.7624	12.7077	1.60945	Enzyme classification;Protein modification	-	-0.638181
sbi-miR164.4	Sobic.003G362400	3	-1	70	90	UGGAGAAGCAGGGCACGUGCU	.::.:::::::::: :::::	GGCGCGUGCCCUGCCUCUCCC	Cleavage	LOC_Os01g63890;LOC_Os04g55290	-;-	-;-	AT4G21110	-	G10 family protein.	Zm00001eb366930;Zm00001eb366990	-;-	G10 domain-containing protein.#(Zm00001eb366930);G10 domain-containing protein.#(Zm00001eb366990)	79.7527	63.1455	36.0291	28.0291	24.6685	RNA processing	-	-0.62355
sbi-miR164.4	Sobic.003G395900	2.5	-1	1536	1556	UGGAGAAGCAGGGCACGUGCU	.::::::.: :::::::::	CCUACGUGCUCAGCUUCUCCA	Translation	LOC_Os01g68050;LOC_Os01g68050;LOC_Os01g68050;LOC_Os01g68050;LOC_Os01g68050;LOC_Os01g68050;LOC_Os01g68050;LOC_Os01g68050;LOC_Os01g68050	OsProT1#(LOC_Os01g68050);OsProT1#(LOC_Os01g68050);OsProT1#(LOC_Os01g68050);OsProT1#(LOC_Os01g68050);OsProT1#(LOC_Os01g68050);OsProT1#(LOC_Os01g68050);OsProT1#(LOC_Os01g68050);OsProT1#(LOC_Os01g68050);OsProT1#(LOC_Os01g68050)	qRT-PCR analyses suggested that OsProT1 was preferentially expressed in leaf sheathes during vegetative growth, while OsProT3 exhibited relatively high expression levels in several tissues, including nodes, panicles and roots.#(leaf#(OsProT1#(LOC_Os01g68050)));qRT-PCR analyses suggested that OsProT1 was preferentially expressed in leaf sheathes during vegetative growth, while OsProT3 exhibited re…	-	-	-	Zm00001eb144010	-	Proline transporter 1	0.0963562	0.183388	0.059874	0.022789	0	Amino acid metabolism;Solute transport	-	-0.604392
sbi-miR164.4	Sobic.006G225700	2	-1	2324	2344	UGGAGAAGCAGGGCACGUGCU	..::::::::::::::::	AAGGUGUGCCCUGCUUCUCCA	Cleavage	-	-	-	-	-	-	-	-	-	0.605386	0.520884	0.0428316	0.0139387	0.0483576	Chromatin organisation	-	-0.598827
sbi-miR164.4	Sobic.003G128500	3.5	-1	1124	1144	UGGAGAAGCAGGGCACGUGCU	::::.:::.:: :.::::.::	AGCAUGUGUCCAGUUUCUUCA	Translation	-	-	-	AT5G38390;AT3G58860;AT5G38396;AT1G52650;AT3G58820;AT3G58900;AT4G13960;AT3G58950;AT3G58910;AT5G38386;AT3G59000	-;-;-;-;-;-;-;-;-;-;-	F-box/RNI-like superfamily protein.#(AT5G38390);F-box/RNI-like superfamily protein.#(AT3G58860);F-box/RNI-like superfamily protein.#(AT5G38396);F-box/RNI superfamily protein.#(AT1G52650);F-box/RNI-like superfamily protein.#(AT3G58820);F-box/RNI-like superfamily protein.#(AT3G58900);F-box/RNI-like superfamily protein.#(AT4G13960);F-box/RNI-like superfamily protein.#(AT3G58950);F-box family protein…	Zm00001eb411850;Zm00001eb152580	-;-	FBD domain-containing protein.#(Zm00001eb411850);FBD domain-containing protein.#(Zm00001eb152580)	8.79192	4.79118	2.34576	1.10587	5.1315	-	-	-0.595848
sbi-miR164.4	Sobic.002G336200	4	-1	2048	2068	UGGAGAAGCAGGGCACGUGCU	:::: ::::.:::: :.:.::	AGCAGGUGCUCUGCCUUUUCA	Cleavage	-	-	-	AT4G05140;AT4G05120;AT4G05130;AT4G05110	-;FUDR RESISTANT 1 (FUR1)#(AT4G05120);EQUILIBRATIVE NUCLEOSIDE TRANSPORTER 4 (ENT4)#(AT4G05130);-	Nucleoside transporter family protein.#(AT4G05140);Encodes an equilibrative nucleoside transporter AtENT3. Mutations of this locus allow mutants to grow on uridine analogue fluorouridine.#(AT4G05120);equilibrative nucleoside transporter 4.#(AT4G05130);equilibrative nucleoside transporter 6.#(AT4G05110)	-	-	-	28.388	26.1827	7.41205	5.91526	3.15931	Nucleotide metabolism;Solute transport	-	-0.584753
sbi-miR164.4	Sobic.003G306200	3.5	-1	1656	1676	UGGAGAAGCAGGGCACGUGCU	:::.:::::.:::::.: :.	UGCAUGUGCCUUGCUUUUACG	Cleavage	LOC_Os01g55880;LOC_Os08g07540	-;-	-;-	AT2G03390	(CLPF)	One of the two adaptors (together with CLPS1) that are part of the plastid CLP system. Interacts with chloroplast chaperone CLPC1, which unfolds and delivers substrates to the stromal CLPPRT protease complex for degradation.	Zm00001eb370310	-	YccV-like domain-containing protein	14.5217	18.1186	10.546	7.64689	2.57736	Protein homeostasis	-	-0.568389
sbi-miR164.4	Sobic.009G216800	3.5	-1	976	996	UGGAGAAGCAGGGCACGUGCU	:::.:::::::::: :::.	UGCAUGUGCCCUGCUGCUCUC	Cleavage	-	-	-	AT5G47770;AT4G17190	FARNESYL DIPHOSPHATE SYNTHASE 1 (FPS1)#(AT5G47770);FARNESYL DIPHOSPHATE SYNTHASE 2 (FPS2)#(AT4G17190)	Encodes a protein with farnesyl diphosphate synthase activity.#(AT5G47770);Encodes a protein with farnesyl diphosphate synthase activity, which catalyzes the rate limiting step in isoprenoid biosynthesis. Its mRNA is most abundantly expressed in flowers.#(AT4G17190)	Zm00001eb342550	-	Farnesyl pyrophosphate synthase	136.908	162.426	168.848	80.2706	1.94189	Secondary metabolism	-	-0.566121
sbi-miR164.4	Sobic.007G105500	2.5	-1	281	301	UGGAGAAGCAGGGCACGUGCU	.::.: ::::::::::::::	GGCGCCUGCCCUGCUUCUCCC	Cleavage	LOC_Os04g23890;LOC_Os04g23890;LOC_Os04g23890	OsNPH1b#(LOC_Os04g23890);OsNPH1b#(LOC_Os04g23890);OsNPH1b#(LOC_Os04g23890)	Northern blot analysis showed that OsNPH1a was strongly expressed in coleoptiles, whereas OsNPH1b was highly expressed in leaves of dark-grown rice seedlings.#(seedlings#(OsNPH1b#(LOC_Os04g23890)));When the dark-grown seedlings were transferred to the continuous white light, the abundance of the OsNPH1a transcript in coleoptiles rapidly declined to the minimum levels, whereas the OsNPH1b transcri…	AT5G58140	PHOTOTROPIN 2 (PHOT2)	Membrane-bound protein serine/threonine kinase that functions as blue light photoreceptor in redundancy with PHO1. Involved in stomatal opening, chloroplast movement and phototropism. Mediates blue light-induced growth enhancements. PHOT1 and PHOT2 mediate blue light-dependent activation of the plasma membrane H+-ATPase in guard cell protoplasts. PHOT2 possesses two LOV (LOV1 and LOV2, for light-…	Zm00001eb042710	-	Putative LOV domain-containing protein	1.24699	0.701977	0.086839	0.0446452	0.0348193	Enzyme classification;External stimuli response;Protein modification	-	-0.551681
sbi-miR164.4	Sobic.009G172300	2	-1	100	120	UGGAGAAGCAGGGCACGUGCU	:::.::::::: ::::::::	UGCAUGUGCCCUUCUUCUCCA	Cleavage	-	-	-	-	-	-	-	-	-	6.92816	4.40568	0.0142829	0.0587136	0	-	-	-0.543388
sbi-miR164.4	Sobic.010G229000	4	-1	4113	4133	UGGAGAAGCAGGGCACGUGCU	::::: ::::.::.:: :.::	AGCACAUGCCUUGUUUGUUCA	Cleavage	LOC_Os06g46410;LOC_Os06g46410;LOC_Os06g46410;LOC_Os06g46410;LOC_Os06g46410;LOC_Os06g46410;LOC_Os06g46410;LOC_Os06g46410;LOC_Os06g46410;LOC_Os06g46410;LOC_Os06g46410;LOC_Os06g46410;LOC_Os06g46410;LOC_Os06g46410;LOC_Os06g46410	OsARF17#(LOC_Os06g46410);OsARF17#(LOC_Os06g46410);OsARF17#(LOC_Os06g46410);OsARF17#(LOC_Os06g46410);OsARF17#(LOC_Os06g46410);OsARF17#(LOC_Os06g46410);OsARF17#(LOC_Os06g46410);OsARF17#(LOC_Os06g46410);OsARF17#(LOC_Os06g46410);OsARF17#(LOC_Os06g46410);OsARF17#(LOC_Os06g46410);OsARF17#(LOC_Os06g46410);OsARF17#(LOC_Os06g46410);OsARF17#(LOC_Os06g46410);OsARF17#(LOC_Os06g46410)	Being consistent, transgenic plants with OsIAA12 overexpression or deficiency of OsARF17 which interacts with OsIAA12 do present enlarged leaf inclination.#(leaf#(OsARF17#(LOC_Os06g46410)));Distinct modes of manipulation of rice auxin response factor OsARF17 by different plant RNA viruses for infection.#(auxin#(OsARF17#(LOC_Os06g46410))); This suggests that OsARF17 plays a crucial role in plant d…	AT1G30330	AUXIN RESPONSE FACTOR 6 (ARF6)	Encodes a member of the auxin response factor family. Mediates auxin response via expression of auxin regulated genes. Acts redundantly with ARF8 to control stamen elongation and flower maturation. Expression of ARF6 is controlled by miR167.	Zm00001eb224680	-	Auxin response factor	256.253	134.102	19.69	16.3013	7.32479	RNA biosynthesis	ARF	-0.526051
sbi-miR164.4	Sobic.002G168000	2.5	-1	166	187	UGGAGAAGCAGGGCA-CGUGCU	.::::: ::::::::::::::.	GGCACGGUGCCCUGCUUCUCCG	Cleavage	LOC_Os09g14880;LOC_Os09g14960	-;-	-;-	-	-	-	-	-	-	17.7969	11.1018	4.9662	4.46439	2.49512	-	-	-0.525672
sbi-miR164.4	Sobic.003G329400	2	-1	1536	1556	UGGAGAAGCAGGGCACGUGCU	::. :::.:::::::::::	CUCAUCUGCUCUGCUUCUCCA	Cleavage	LOC_Os01g59340	-	-	AT5G12200	PYRIMIDINE 2 (PYD2)	Encodes a protein with dihydropyrimidine amidohydrolase activity. It localizes to the secretory system and plays a role in uracil metabolism.	Zm00001eb150370	-	Dihydropyrimidinase	29.0976	35.5113	18.3175	17.0215	6.4661	Nucleotide metabolism	-	-0.488584
sbi-miR164.4	Sobic.007G071000	2	-1	872	892	UGGAGAAGCAGGGCACGUGCU	:::: :::.:::::::::::.	AGCAGGUGUCCUGCUUCUCCG	Cleavage	LOC_Os08g10080	OMTN6	Overexpression of OMTN2, OMTN3, OMTN4, and OMTN6 in rice led to negative effects on drought resistance at the reproductive stage.	-	-	-	Zm00001eb413540	-	NAC domain-containing protein	8.5233	7.44361	2.52178	3.00251	0.526694	RNA biosynthesis	NAC	-0.470249
sbi-miR164.4	Sobic.001G461200	4	-1	860	880	UGGAGAAGCAGGGCACGUGCU	::::.:::.:::: :::: ::	AGCAUGUGUCCUGGUUCUGCA	Cleavage	LOC_Os03g11210	-	-	AT2G03350	-	DUF538 family protein (Protein of unknown function, DUF538).	Zm00001eb400480	-	Pentatricopeptide repeat-containing family protein	42.3312	10.8871	7.21322	5.60307	1.03309	-	-	-0.425872
sbi-miR164.4	Sobic.002G199200	3	-1	905	925	UGGAGAAGCAGGGCACGUGCU	:::::::: :::::::::::	AGCACGUGAACUGCUUCUCCA	Cleavage	LOC_Os09g24560	-	-	-	-	-	-	-	-	0.0204033	0.122422	0	0	0	-	NAC	-0.419268
sbi-miR164.4	Sobic.002G414850	2.5	-1	579	599	UGGAGAAGCAGGGCACGUGCU	:::::::..:: ::::::::	CGCACGUGUUCUCCUUCUCCA	Cleavage	-	-	-	-	-	-	-	-	-	0.0458444	1.10546	0	0	0	-	-	-0.367241
sbi-miR164.4	Sobic.001G283900	4	-1	632	652	UGGAGAAGCAGGGCACGUGCU	::::.:::..:: :::::::	AGCAUGUGUUCUCCUUCUCCC	Cleavage	-	-	-	-	-	-	-	-	-	0	0.0504493	0	0	0	-	-	-0.349248
sbi-miR164.4	Sobic.010G052700	3.5	-1	283	303	UGGAGAAGCAGGGCACGUGCU	:..:::::.:: :::::::.	UGUGCGUGCUCUCCUUCUCCG	Cleavage	LOC_Os06g07040;LOC_Os06g07040	OsIAA20#(LOC_Os06g07040);OsIAA20#(LOC_Os06g07040)	Knockout of OsbZIP49 led to reduced expression of both OsGH3-2 and OsGH3-13 within the shoot base, and increased accumulation of IAA and increased OsIAA20 expression levels were observed in transformants following gravistimulation.#(shoot#(OsIAA20#(LOC_Os06g07040)));Knockout of OsbZIP49 led to reduced expression of both OsGH3-2 and OsGH3-13 within the shoot base, and increased accumulation of IAA…	-	-	-	Zm00001eb271530	-	Auxin-responsive protein IAA20	0.119183	31.8526	3.77891	2.70218	4.4931	Phytohormone action.auxin	-	-0.322347
sbi-miR164.4	Sobic.010G227300	1	-1	993	1013	UGGAGAAGCAGGGCACGUGCU	:::: ::::::::::::::::	AGCAAGUGCCCUGCUUCUCCA	Cleavage	LOC_Os06g46270;LOC_Os06g46270;LOC_Os06g46270;LOC_Os06g46270;LOC_Os06g46270;LOC_Os06g46270;LOC_Os06g46270;LOC_Os06g46270;LOC_Os06g46270;LOC_Os06g46270;LOC_Os06g46270;LOC_Os06g46270;LOC_Os06g46270;LOC_Os06g46270;LOC_Os06g46270	OMTN4|ONAC011|OsY37#(LOC_Os06g46270);OMTN4|ONAC011|OsY37#(LOC_Os06g46270);OMTN4|ONAC011|OsY37#(LOC_Os06g46270);OMTN4|ONAC011|OsY37#(LOC_Os06g46270);OMTN4|ONAC011|OsY37#(LOC_Os06g46270);OMTN4|ONAC011|OsY37#(LOC_Os06g46270);OMTN4|ONAC011|OsY37#(LOC_Os06g46270);OMTN4|ONAC011|OsY37#(LOC_Os06g46270);OMTN4|ONAC011|OsY37#(LOC_Os06g46270);OMTN4|ONAC011|OsY37#(LOC_Os06g46270);OMTN4|ONAC011|OsY37#(LOC_Os06…	Overexpression of OMTN2, OMTN3, OMTN4, and OMTN6 in rice led to negative effects on drought resistance at the reproductive stage.#(drought resistance#(OMTN4|ONAC011|OsY37#(LOC_Os06g46270)));The NAC Transcription Factor Gene OsY37 (ONAC011) Promotes Leaf Senescence and Accelerates Heading Time in Rice.#(leaf#(OMTN4|ONAC011|OsY37#(LOC_Os06g46270)));The NAC Transcription Factor Gene OsY37 (ONAC011) …	AT3G12977;AT1G56010	NAC1 LIKE (NAC1L)#(AT3G12977);NAC DOMAIN CONTAINING PROTEIN 1 (NAC1)#(AT1G56010)	NAC transcription regulator. Regulates endosperm cell expansion during germination.#(AT3G12977);Encodes a transcription factor involved auxin-mediated lateral root formation. Acts downstream of TIR1 and is regulated post-transcriptionally by miRNA164 and by SINAT5-dependent ubiquitination.#(AT1G56010)	Zm00001eb224800	-	NAC domain-containing protein	9.92299	29.4599	8.7764	10.4496	0.401491	RNA biosynthesis	NAC	-0.294002
sbi-miR164.4	Sobic.004G191700	1.5	-1	1082	1102	UGGAGAAGCAGGGCACGUGCU	:::::: ::::::::::::	CACACGUGACCUGCUUCUCCA	Cleavage	LOC_Os02g36880	OMTN1	Under cold stress, the expression levels of OMTN1 and OMTN2 were increased, while the expression levels of the other three genes (OMTN3, OMTN4, and OMTN6) did not change significantly.	AT3G29035;AT5G07680;AT5G61430;AT5G39610	NAC DOMAIN CONTAINING PROTEIN 3 (NAC3)#(AT3G29035);NAC DOMAIN CONTAINING PROTEIN 80 (NAC080)#(AT5G07680);NAC DOMAIN CONTAINING PROTEIN 100 (NAC100)#(AT5G61430);NAC DOMAIN CONTAINING PROTEIN 6 (NAC6)#(AT5G39610)	Encodes a protein with transcription factor activity. Note: this protein (AT3G29035) on occasion has also been referred to as AtNAC3, not to be confused with the AtNAC3 found at locus AT3G15500. The mRNA is cell-to-cell mobile.#(AT3G29035);NAC domain containing protein 80.#(AT5G07680);(NAC) domain transcription factor; regulated at both transcriptional and post-transcriptional levels under Fe-def…	Zm00001eb245030	-	NAC domain-containing protein	4.06367	22.8272	33.9661	14.2619	1.2668	RNA biosynthesis	NAC	-0.258301
sbi-miR164.4	Sobic.006G107400	2	-1	871	891	UGGAGAAGCAGGGCACGUGCU	:::::: :::::::::::.	CACACGUGACCUGCUUCUCCG	Cleavage	LOC_Os04g38720;LOC_Os04g38720;LOC_Os04g38720;LOC_Os04g38720;LOC_Os04g38720;LOC_Os04g38720;LOC_Os04g38720;LOC_Os04g38720;LOC_Os04g38720;LOC_Os04g38720;LOC_Os04g38720;LOC_Os04g38720;LOC_Os04g38720;LOC_Os04g38720;LOC_Os04g38720;LOC_Os04g38720;LOC_Os04g38720;LOC_Os04g38720;LOC_Os04g38720;LOC_Os04g38720;LOC_Os04g38720;LOC_Os04g38720;LOC_Os04g38720;LOC_Os04g38720;LOC_Os04g38720;LOC_Os04g38720;LOC_Os04g…	OsNAC2|OsTIL1|OMTN2|OsORE1#(LOC_Os04g38720);OsNAC2|OsTIL1|OMTN2|OsORE1#(LOC_Os04g38720);OsNAC2|OsTIL1|OMTN2|OsORE1#(LOC_Os04g38720);OsNAC2|OsTIL1|OMTN2|OsORE1#(LOC_Os04g38720);OsNAC2|OsTIL1|OMTN2|OsORE1#(LOC_Os04g38720);OsNAC2|OsTIL1|OMTN2|OsORE1#(LOC_Os04g38720);OsNAC2|OsTIL1|OMTN2|OsORE1#(LOC_Os04g38720);OsNAC2|OsTIL1|OMTN2|OsORE1#(LOC_Os04g38720);OsNAC2|OsTIL1|OMTN2|OsORE1#(LOC_Os04g38720);OsN…	Overexpression of OsNAC2 regulates shoot branching in rice.#(branching#(OsNAC2|OsTIL1|OMTN2|OsORE1#(LOC_Os04g38720)));Overexpression of OsNAC2 contributes tiller bud outgrowth, but does not affect tiller bud initiation.#(tiller#(OsNAC2|OsTIL1|OMTN2|OsORE1#(LOC_Os04g38720)));Here, an activation-tagging mutant Ostil1 (Oryza sativa tillering1) was characterized, which showed increased tillers, enlar…	AT3G29035;AT5G07680;AT5G61430;AT5G39610	NAC DOMAIN CONTAINING PROTEIN 3 (NAC3)#(AT3G29035);NAC DOMAIN CONTAINING PROTEIN 80 (NAC080)#(AT5G07680);NAC DOMAIN CONTAINING PROTEIN 100 (NAC100)#(AT5G61430);NAC DOMAIN CONTAINING PROTEIN 6 (NAC6)#(AT5G39610)	Encodes a protein with transcription factor activity. Note: this protein (AT3G29035) on occasion has also been referred to as AtNAC3, not to be confused with the AtNAC3 found at locus AT3G15500. The mRNA is cell-to-cell mobile.#(AT3G29035);NAC domain containing protein 80.#(AT5G07680);(NAC) domain transcription factor; regulated at both transcriptional and post-transcriptional levels under Fe-def…	Zm00001eb080700	-	NAC domain-containing protein 79	18.1199	169.985	187.634	101.544	4.8287	RNA biosynthesis	NAC	-0.190983
sbi-miR164.4	Sobic.008G071400	1	-1	1174	1194	UGGAGAAGCAGGGCACGUGCU	::: :::::::::::::::::	AGCUCGUGCCCUGCUUCUCCA	Cleavage	LOC_Os06g23650;LOC_Os06g23650;LOC_Os06g23650;LOC_Os06g23650;LOC_Os06g23650;LOC_Os06g23650;LOC_Os06g23650;LOC_Os06g23650;LOC_Os06g23650	OsCUC1|OMTN5#(LOC_Os06g23650);OsCUC1|OMTN5#(LOC_Os06g23650);OsCUC1|OMTN5#(LOC_Os06g23650);OsCUC1|OMTN5#(LOC_Os06g23650);OsCUC1|OMTN5#(LOC_Os06g23650);OsCUC1|OMTN5#(LOC_Os06g23650);OsCUC1|OMTN5#(LOC_Os06g23650);OsCUC1|OMTN5#(LOC_Os06g23650);OsCUC1|OMTN5#(LOC_Os06g23650)	Further study indicated that OsCUC1 physically interacts with leaf-rolling related protein CURLED LEAF AND DWARF 1 (CLD1) and stabilizes it in the nucleus to control leaf morphology.#(leaf#(OsCUC1|OMTN5#(LOC_Os06g23650)));In addition, knockout of OsCUC1 leads to multiple defects, including dwarf plant architecture, male sterility and twisted-rolling leaves.#(sterility#(OsCUC1|OMTN5#(LOC_Os06g2365…	AT5G53950	CUP-SHAPED COTYLEDON 2 (CUC2)	Transcriptional activator of the NAC gene family, with CUC1 redundantly required for embryonic apical meristem formation, cotyledon separation and expression of STM. Proper timing of CUC2 expression is required to maintain the phyllotactic pattern initiated in the meristem. CUC2 expression in leaf sinus region is required for serration and the extent of serration is modulated by mir164A mediated …	Zm00001eb264380	-	Protein CUP-SHAPED COTYLEDON 2	0.0664683	0.0679248	0.0197044	0.0559197	0	RNA biosynthesis	NAC	-0.0238979
sbi-miR164.4	Sobic.009G207500	3.5	-1	1917	1937	UGGAGAAGCAGGGCACGUGCU	.:::::::.::::::::	CUUACGUGCCUUGCUUCUCAG	Cleavage	-	-	-	AT1G32660;AT1G30790;AT5G22791;AT3G47150;AT1G70960;AT1G70380;AT1G70970	-;-;-;-;-;-;-	F-box and associated interaction domains-containing protein.#(AT1G32660);F-box and associated interaction domains-containing protein.#(AT1G30790);F-box family protein.#(AT5G22791);F-box and associated interaction domains-containing protein.#(AT3G47150);F-box and associated interaction domains-containing protein.#(AT1G70960);F-box and associated interaction domains-containing protein.#(AT1G70380);…	-	-	-	8.67754	2.97619	18.3084	11.7453	3.52879	-	-	0.0636256
sbi-miR164.4	Sobic.008G164800	1	-1	874	894	UGGAGAAGCAGGGCACGUGCU	:::: ::::::::::::::::	AGCAGGUGCCCUGCUUCUCCA	Cleavage	LOC_Os12g41680;LOC_Os12g41680;LOC_Os12g41680;LOC_Os12g41680;LOC_Os12g41680;LOC_Os12g41680;LOC_Os12g41680;LOC_Os12g41680	OMTN3|OsNAC60#(LOC_Os12g41680);OMTN3|OsNAC60#(LOC_Os12g41680);OMTN3|OsNAC60#(LOC_Os12g41680);OMTN3|OsNAC60#(LOC_Os12g41680);OMTN3|OsNAC60#(LOC_Os12g41680);OMTN3|OsNAC60#(LOC_Os12g41680);OMTN3|OsNAC60#(LOC_Os12g41680);OMTN3|OsNAC60#(LOC_Os12g41680)	Overexpression of OMTN2, OMTN3, OMTN4, and OMTN6 in rice led to negative effects on drought resistance at the reproductive stage.#(drought resistance#(OMTN3|OsNAC60#(LOC_Os12g41680)));OsNAC60 encodes a transcription factor, over-expression of which enhanced defense responses, such as increased programmed cell death, greater ion leakage, more ROS accumulation and callose deposition, and up-regulat…	-	-	-	Zm00001eb135910	-	NAC domain-containing protein	5.29759	3.27827	5.5097	5.79035	0.0354764	RNA biosynthesis	NAC	0.0903302
sbi-miR164.4	Sobic.003G087600	2.5	-1	1171	1191	UGGAGAAGCAGGGCACGUGCU	:: :::::::::::::::.	CGCCGGUGCCCUGCUUCUCCG	Cleavage	LOC_Os01g03720;LOC_Os01g03720;LOC_Os01g03720;LOC_Os01g03720;LOC_Os01g03720;LOC_Os01g03720;LOC_Os01g03720;LOC_Os01g03720;LOC_Os01g03720;LOC_Os01g03720;LOC_Os01g03720;LOC_Os01g03720;LOC_Os01g03720;LOC_Os01g03720;LOC_Os01g03720	MYB1#(LOC_Os01g03720);MYB1#(LOC_Os01g03720);MYB1#(LOC_Os01g03720);MYB1#(LOC_Os01g03720);MYB1#(LOC_Os01g03720);MYB1#(LOC_Os01g03720);MYB1#(LOC_Os01g03720);MYB1#(LOC_Os01g03720);MYB1#(LOC_Os01g03720);MYB1#(LOC_Os01g03720);MYB1#(LOC_Os01g03720);MYB1#(LOC_Os01g03720);MYB1#(LOC_Os01g03720);MYB1#(LOC_Os01g03720);MYB1#(LOC_Os01g03720)	MYB1 was transcriptionally induced in leaf sheaths and old leaf blades.#(leaf#(MYB1#(LOC_Os01g03720)));Furthermore, MYB1 affected the elongation of the primary root in a Pi-dependent manner and lateral roots in a Pi-independent manner.#(root#(MYB1#(LOC_Os01g03720)));Moreover, gibberellic acid (GA)-triggered lateral root elongation was largely suppressed in wild-type plants under Pi starvation con…	-	-	-	Zm00001eb335060	-	transcription factor MYB62	2.27405	2.54908	8.39333	8.49956	1.07761	RNA biosynthesis	MYB	0.428262
sbi-miR164.4	Sobic.004G239750	3.5	-1	221	241	UGGAGAAGCAGGGCACGUGCU	:::.:::...:::: :::::	CGCAUGUGUUUUGCUCCUCCA	Cleavage	-	-	-	-	-	-	-	-	-	0.492091	0.228309	0.827251	1.10606	1.15398	-	-	0.700787
sbi-miR166.1	Sobic.001G084700	3.5	-1	304	324	UCGGACCAGGCUUCAAUCCCU	: : :::::::::::::: :	AUGCAUUGAAGCCUGGUCGGC	Cleavage	LOC_Os03g55030;LOC_Os03g55010	-;-	-;-	AT3G02100	-	UDP-Glycosyltransferase superfamily protein.	Zm00001eb057740	-	UDP-glucoronosyl and UDP-glucosyl transferase family protein	0.413839	0.387624	0.22317	2.8503	8.92181	Enzyme classification	-	-0.524621
sbi-miR166.1	Sobic.010G069600	4.5	-1	3025	3045	UCGGACCAGGCUUCAAUCCCU	:::::::::.:..::: .::	AGGGAUUGAGGUUUGGCUCGC	Cleavage	LOC_Os06g09180	-	-	AT1G51660;AT3G21220	MITOGEN-ACTIVATED PROTEIN KINASE KINASE 4 (MKK4)#(AT1G51660);MAP KINASE KINASE 5 (MKK5)#(AT3G21220)	Encodes a mitogen-activated map kinase kinase (there are nine in Arabidopsis) involved in innate immunity. This protein activates MPK3/MPK6 and early-defense genes redundantly with MKK5. In plants with both MKK5 and MKK4 levels reduced by RNAi plants, floral organs do not abscise suggestion a role for both proteins in mediating floral organ abscission. The mRNA is cell-to-cell mobile.#(AT1G51660)…	Zm00001eb374270	-	MAP kinase kinase	7.04254	6.62501	6.67701	3.5397	18.1997	Enzyme classification;Multi-process regulation	-	-0.247705
sbi-miR166.1	Sobic.002G368600	3.5	-1	1237	1257	UCGGACCAGGCUUCAAUCCCU	:::::::.:::::: :::	GUGGAUUGAGGCCUGGGACGA	Cleavage	LOC_Os07g41360;LOC_Os07g41360;LOC_Os07g41360;LOC_Os07g41360	OsUAM3#(LOC_Os07g41360);OsUAM3#(LOC_Os07g41360);OsUAM3#(LOC_Os07g41360);OsUAM3#(LOC_Os07g41360)	UDP-Arabinopyranose Mutase 3 is Required for Pollen Wall Morphogenesis in Rice (Oryza sativa).#(pollen wall morphogenesis#(OsUAM3#(LOC_Os07g41360)));UDP-Arabinopyranose Mutase 3 is Required for Pollen Wall Morphogenesis in Rice (Oryza sativa).#(pollen wall#(OsUAM3#(LOC_Os07g41360)));UDP-Arabinopyranose Mutase 3 is Required for Pollen Wall Morphogenesis in Rice (Oryza sativa).#(pollen#(OsUAM3#(LOC…	AT5G15650;AT3G02230	REVERSIBLY GLYCOSYLATED POLYPEPTIDE 2 (RGP2)#(AT5G15650);REVERSIBLY GLYCOSYLATED POLYPEPTIDE 1 (RGP1)#(AT3G02230)	RGP2 is a UDP-arabinose mutase that catalyzes the interconversion between the pyranose and furanose forms of UDP-L-arabinose. It appears to be required for proper cell wall formation. rgp1(at3g02230)/rgp2 double mutants have a male gametophyte lethal phenotype. RGP2 fusion proteins can be found in the cytosol and peripherally associated with the Golgi apparatus. RGP2 was originally identified as …	Zm00001eb327030	-	UDP-arabinopyranose mutase	4.86265	6.41699	16.9044	5.2091	0.237523	Carbohydrate metabolism	-	-0.168171
sbi-miR166.1	Sobic.002G176900	3	-1	133	153	UCGGACCAGGCUUCAAUCCCU	::::.:::::::::.::	CGCCAUUGGAGCCUGGUCUGA	Cleavage	-	-	-	-	-	-	-	-	-	0.217332	0.776848	1.13349	0.282504	0	-	-	-0.0372823
sbi-miR166.1	Sobic.010G084400	3.5	-1	648	668	UCGGACCAGGCUUCAAUCCCU	: ::::::.::: :::.:::	CGCGAUUGAGGCCGGGUUCGA	Cleavage	-	-	-	-	-	-	Zm00001eb279210	-	12-oxophytodienoate reductase 2	0.751237	0.255231	0.963818	0.678929	0.100237	Enzyme classification	-	-0.031726
sbi-miR166.1	Sobic.003G028300	2	-1	1323	1343	UCGGACCAGGCUUCAAUCCCU	::. ::::::::::::::.	CCGGGAUGAAGCCUGGUCCGG	Cleavage	-	-	-	-	-	-	Zm00001eb337970	-	homeobox-leucine zipper protein ATHB-15-like	2.20719	1.35624	3.00831	1.6285	0.212338	Plant organogenesis;RNA biosynthesis	HD-ZIP	0.139193
sbi-miR166.1	Sobic.003G311700	4.5	-1	1120	1140	UCGGACCAGGCUUCAAUCCCU	.:: ::: :::::::::::	GGGAAUUUAAGCCUGGUCCUG	Cleavage	LOC_Os01g56560	-	-	AT4G17650	-	Polyketide cyclase / dehydrase and lipid transport protein.	Zm00001eb370050	-	coenzyme Q-binding protein COQ10 homolog	23.0926	19.4842	8.59186	6.73867	27.7888	-	-	0.430336
sbi-miR166.1	Sobic.004G011000	2.5	-1	987	1007	UCGGACCAGGCUUCAAUCCCU	::::::.::: :::::.::	GUGGAUUGGAGCAUGGUCUGA	Cleavage	LOC_Os02g02360	-	-	AT5G41190	(NOB1)	Encodes a cytoplasmic protein with RNA endonuclease activity. Mutants display aberrant RNA processing and male and female gametophyte development.	Zm00001eb209610	-	RNA-binding protein NOB1	165.896	112.146	36.2863	31.6127	167.868	Protein biosynthesis	-	0.536167
sbi-miR166.1	Sobic.001G157400	2	-1	866	886	UCGGACCAGGCUUCAAUCCCU	::. ::::::::::::::.	UUGGGAUGAAGCCUGGUCCGG	Cleavage	LOC_Os03g43930;LOC_Os03g43930;LOC_Os03g43930;LOC_Os03g43930;LOC_Os03g43930;LOC_Os03g43930;LOC_Os03g43930;LOC_Os03g43930;LOC_Os03g43930;LOC_Os03g43930;LOC_Os03g43930;LOC_Os03g43930;LOC_Os03g43930;LOC_Os03g43930;LOC_Os03g43930;LOC_Os03g43930;LOC_Os03g43930;LOC_Os03g43930;LOC_Os03g43930;LOC_Os03g43930;LOC_Os03g43930;LOC_Os03g43930;LOC_Os03g43930;LOC_Os03g43930;LOC_Os03g43930;LOC_Os03g43930;LOC_Os03g…	OSHB4|OsHox32#(LOC_Os03g43930);OSHB4|OsHox32#(LOC_Os03g43930);OSHB4|OsHox32#(LOC_Os03g43930);OSHB4|OsHox32#(LOC_Os03g43930);OSHB4|OsHox32#(LOC_Os03g43930);OSHB4|OsHox32#(LOC_Os03g43930);OSHB4|OsHox32#(LOC_Os03g43930);OSHB4|OsHox32#(LOC_Os03g43930);OSHB4|OsHox32#(LOC_Os03g43930);OSHB4|OsHox32#(LOC_Os03g43930);OSHB4|OsHox32#(LOC_Os03g43930);OSHB4|OsHox32#(LOC_Os03g43930);OSHB4|OsHox32#(LOC_Os03g439…	Direct regulation of other transcription factor genes like OsHB4 (a class III homeodomain Leu zipper member), OsBLH1 (a BEL1-like homeodomain member), OsKANADI2, OsKANADI4, and OsETTIN2 show its role in meristem maintenance, determinacy, and lateral organ development.#(transcription factor#(OSHB4|OsHox32#(LOC_Os03g43930)));Direct regulation of other transcription factor genes like OsHB4 (a class …	AT1G30490;AT2G34710	PHAVOLUTA (PHV)#(AT1G30490);PHABULOSA (PHB)#(AT2G34710)	Dominant PHV mutations cause transformation of abaxial leaf fates into adaxial leaf fates. Has overlapping functions with PHABULOSA, REVOLUTA and CORONA/ATHB15 in patterning the apical portion of the embryo. Encodes a member of HD-Zip family which contains homeodomain-leucine zipper domains and domain similar to a mammalian sterol binding domain.#(AT1G30490);Dominant PHB mutations cause transform…	Zm00001eb050660	-	Homeobox-leucine zipper protein HOX32	17.8439	51.67	12.0125	7.65035	1.88076	Plant organogenesis;RNA biosynthesis	HD-ZIP	0.657909
sbi-miR166.1	Sobic.004G268100	4.5	-1	1045	1065	UCGGACCAGGCUUCAAUCCCU	::::::: .:::::: : :::	AGGGAUUUGAGCCUGAUGCGA	Cleavage	LOC_Os02g47590	-	-	AT1G75330	ORNITHINE CARBAMOYLTRANSFERASE (OTC)	ornithine carbamoyltransferase.	Zm00001eb252020	-	Ornithine carbamoyltransferase	70.3097	80.422	69.6923	26.8874	16.6246	Amino acid metabolism;Enzyme classification	-	0.687077
sbi-miR166.1	Sobic.008G168100	2	-1	869	889	UCGGACCAGGCUUCAAUCCCU	::. ::::::::::::::.	UUGGGAUGAAGCCUGGUCCGG	Cleavage	-	-	-	AT1G30490;AT2G34710	PHAVOLUTA (PHV)#(AT1G30490);PHABULOSA (PHB)#(AT2G34710)	Dominant PHV mutations cause transformation of abaxial leaf fates into adaxial leaf fates. Has overlapping functions with PHABULOSA, REVOLUTA and CORONA/ATHB15 in patterning the apical portion of the embryo. Encodes a member of HD-Zip family which contains homeodomain-leucine zipper domains and domain similar to a mammalian sterol binding domain.#(AT1G30490);Dominant PHB mutations cause transform…	Zm00001eb136060	-	Homeobox-leucine zipper protein ATHB-14	23.1007	46.5657	10.4933	9.07631	2.63194	Plant organogenesis;RNA biosynthesis	HD-ZIP	0.770733
sbi-miR166.1	Sobic.001G217200	2	-1	1044	1064	UCGGACCAGGCUUCAAUCCCU	::. ::::::::::::::.	CUGGGAUGAAGCCUGGUCCGG	Cleavage	-	-	-	AT5G60690	REVOLUTA (REV)	REVOLUTA regulates meristem initiation at lateral positions. a member of a small homeodomain-leucine zipper family. Has overlapping functions with PHAVOLUTA and PHABULOSA. The mRNA is cell-to-cell mobile.	Zm00001eb045630	-	Rolled leaf2	13.3201	23.8536	7.77403	3.56918	0.547548	Plant organogenesis;RNA biosynthesis	HD-ZIP	0.791729
sbi-miR166.1	Sobic.002G292800	3	-1	2386	2406	UCGGACCAGGCUUCAAUCCCU	:::::::::..::: :.::	GUGGAUUGAAGUUUGGGCUGA	Cleavage	LOC_Os09g38330	-	-	AT1G75010	ACCUMULATION AND REPLICATION OF CHLOROPLASTS 3 (ARC3)	Encodes ARC3 (Accumulation and Replication of Chloroplast 3), a chloroplast division factor functioning in the initiation of chloroplast division. ARC3 is a chimera of the prokaryotic FtsZ and part of the eukaryotic phosphatidylinositol-4-phosphate 5-kinase (PIP5K). Located on the outer surface of the chloroplast in a ring-like structure at the early stage of chloroplast division. The arc3 mutant…	Zm00001eb320640	-	Protein ACCUMULATION AND REPLICATION OF CHLOROPLASTS 3	8.70049	11.0546	6.70568	3.72501	1.73878	Cell division	-	0.805534
sbi-miR166.1	Sobic.001G152320	3	-1	711	731	UCGGACCAGGCUUCAAUCCCU	: :::::::.::::::: :	UUGCAUUGAAGUCUGGUCCUA	Cleavage	-	-	-	-	-	-	-	-	-	14.3859	21.0299	9.08368	5.14866	2.27906	-	-	0.829142
sbi-miR166.1	Sobic.004G168700	4.5	-1	1688	1708	UCGGACCAGGCUUCAAUCCCU	.:: ::::.::.::: ::::	GGGAAUUGGAGUCUGAUCCGU	Cleavage	LOC_Os02g33550	-	-	-	-	-	Zm00001eb243040	-	VAMP protein SEC22	75.5067	91.6756	44.7728	8.83235	0.269559	-	-	0.863438
sbi-miR166.1	Sobic.003G041900	5	-1	258	279	UCGGACCAGGCUUCA-AUCCCU	.::::: :::::.:::::::	GGGGAUCUGAAGUCUGGUCCUG	Cleavage	LOC_Os01g08520	-	-	AT5G11460	FCS LIKE ZINC FINGER 10 (FLZ10)	FCS like zinc finger 10 is induced during energy starvation through SnRK1 signaling. Mutants accumulate more SnRK1alpha1 which results in the inhibition of seedling growth under favorable growth conditions. Increased SnRK1 activity in the mutant also results in the downregulation of TOR signaling (DOI:10.1111/tpj.13854).	Zm00001eb122190	-	FLZ-type domain-containing protein	52.9078	31.8382	19.7228	4.42943	23.597	Multi-process regulation	-	0.8746
sbi-miR166.1	Sobic.002G400101	3.5	-1	705	725	UCGGACCAGGCUUCAAUCCCU	::::::::: ::::::. :	UUGGAUUGAAGGCUGGUCUAA	Translation	-	-	-	AT3G58930;AT3G58880;AT3G58890;AT3G03030;AT3G58940;AT3G03040	-;-;-; (PAM18-3)#(AT3G03030);-;-	F-box/RNI-like superfamily protein.#(AT3G58930);F-box/RNI-like superfamily protein.#(AT3G58880);RNI-like superfamily protein.#(AT3G58890);PAM18 homolog; part of Presequence Translocase-Associated Motor (PAM) complex which powers the translocation of proteins across the inner membrane and consists of Hsp70, the J-domain containing co-chaperones, Pam16 and Pam18, and their associated proteins Tim15…	-	-	-	9.68163	10.4552	6.4649	3.93095	2.32724	-	-	0.881286
sbi-miR166.1	Sobic.001G537300	2	-1	681	701	UCGGACCAGGCUUCAAUCCCU	::. ::::::::::::::.	CUGGGAUGAAGCCUGGUCCGG	Cleavage	LOC_Os03g01890;LOC_Os03g01890;LOC_Os03g01890;LOC_Os03g01890;LOC_Os03g01890;LOC_Os03g01890;LOC_Os03g01890;LOC_Os03g01890;LOC_Os03g01890;LOC_Os03g01890;LOC_Os03g01890;LOC_Os03g01890;LOC_Os03g01890;LOC_Os03g01890	OSHB1|LF1#(LOC_Os03g01890);OSHB1|LF1#(LOC_Os03g01890);OSHB1|LF1#(LOC_Os03g01890);OSHB1|LF1#(LOC_Os03g01890);OSHB1|LF1#(LOC_Os03g01890);OSHB1|LF1#(LOC_Os03g01890);OSHB1|LF1#(LOC_Os03g01890);OSHB1|LF1#(LOC_Os03g01890);OSHB1|LF1#(LOC_Os03g01890);OSHB1|LF1#(LOC_Os03g01890);OSHB1|LF1#(LOC_Os03g01890);OSHB1|LF1#(LOC_Os03g01890);OSHB1|LF1#(LOC_Os03g01890);OSHB1|LF1#(LOC_Os03g01890)	Four genes, OSHB1 to OSHB4, were expressed in a localized domain of the shoot apical meristem (SAM), the adaxial cells of leaf primordia, the leaf margins, and the xylem tissue of vascular bundles.#(shoot apical meristem#(OSHB1|LF1#(LOC_Os03g01890)));Four genes, OSHB1 to OSHB4, were expressed in a localized domain of the shoot apical meristem (SAM), the adaxial cells of leaf primordia, the leaf m…	AT5G60690	REVOLUTA (REV)	REVOLUTA regulates meristem initiation at lateral positions. a member of a small homeodomain-leucine zipper family. Has overlapping functions with PHAVOLUTA and PHABULOSA. The mRNA is cell-to-cell mobile.	Zm00001eb404260	-	Rolled leaf 2	47.6631	71.5087	13.5713	6.23702	1.41613	Plant organogenesis;RNA biosynthesis	HD-ZIP	0.890188
sbi-miR166.1	Sobic.006G085100	3.5	-1	1974	1994	UCGGACCAGGCUUCAAUCCCU	:: :.: :::::.:::::::.	AGAGGUGGAAGCUUGGUCCGG	Cleavage	LOC_Os04g35560	-	-	AT1G77290	-	Glutathione S-transferase family protein.	Zm00001eb082540	-	Ganglioside-induced differentiation-associated protein 1	9.55512	10.7478	5.67718	4.5488	2.21835	Redox homeostasis	-	0.896335
sbi-miR166.1	Sobic.004G086800	4.5	-1	50	70	UCGGACCAGGCUUCAAUCCCU	: :.::::::::::::.:	CGUGGUUGAAGCCUGGUUCCG	Cleavage	-	-	-	AT2G26640	3-KETOACYL-COA SYNTHASE 11 (KCS11)	Encodes KCS11, a member of the 3-ketoacyl-CoA synthase family involved in the biosynthesis of VLCFA (very long chain fatty acids).	Zm00001eb240620	-	3-ketoacyl-CoA synthase	112.803	82.08	58.2418	13.7375	40.6759	Lipid metabolism	-	0.901399
sbi-miR166.1	Sobic.009G066500	5	-1	794	815	UCGGACCAGGCUUCA-AUCCCU	.::::: :::::.:::::::	GGGGAUGUGAAGUCUGGUCCAG	Cleavage	LOC_Os05g08800	-	-	AT5G11460	FCS LIKE ZINC FINGER 10 (FLZ10)	FCS like zinc finger 10 is induced during energy starvation through SnRK1 signaling. Mutants accumulate more SnRK1alpha1 which results in the inhibition of seedling growth under favorable growth conditions. Increased SnRK1 activity in the mutant also results in the downregulation of TOR signaling (DOI:10.1111/tpj.13854).	Zm00001eb283770	-	FLZ-type domain-containing protein	27.5034	16.7902	12.1225	1.23023	3.67477	Multi-process regulation	-	0.902883
sbi-miR166.1	Sobic.006G280200	4	-1	3347	3367	UCGGACCAGGCUUCAAUCCCU	:.::::.::.:::::.:	CCAGGUUGAGGCUUGGUCUGC	Cleavage	-	-	-	AT3G14980	REPRESSOR OF SILENCING 4 (ROS4)	IDM1 is a histone H3 acetyltransferase that is capable of recognizing methylated DNA through its MBD domain and recognizing unmethylated histone H3K4 through its PHD domain. It negatively regulates DNA demethylation, preventing DNA hypermethylation of highly homologous multicopy genes and other repetitive sequences.	Zm00001eb434470	LOC103642225	Increased DNA methylation 1	24.65	28.7323	5.0647	2.6537	1.34982	Chromatin organisation	-	0.956674
sbi-miR166.1	Sobic.004G048800	4	-1	1833	1853	UCGGACCAGGCUUCAAUCCCU	::: :::: :::::::: :	UUGGAGUGAAACCUGGUCCAA	Translation	LOC_Os02g06500	-	-	AT3G46960	(SKI2)	The gene encodes a DExD&#8260;H box RNA helicase, involved in the regulation of K+ deprivation stress response.SKI2 encodes the RNA helicase subunit of the SKI complex. Mutation of SKI2 leads to production of secondary siRNAs from miRNA target transcripts.	Zm00001eb232660	-	DExH-box ATP-dependent RNA helicase DExH11	68.1705	72.8606	22.3658	14.7568	5.32657	RNA processing	-	0.958066
sbi-miR166.1	Sobic.001G215400	3.5	-1	1307	1327	UCGGACCAGGCUUCAAUCCCU	: :::::::::::.:::	AACAACUGAAGCCUGGUUCGA	Cleavage	LOC_Os10g34300	-	-	AT1G14315	-	F-box and associated interaction domains-containing protein.	-	-	-	41.6062	34.8421	13.4275	10.3486	17.4472	-	-	0.983626
sbi-miR166.1	Sobic.001G060500	4	-1	1991	2011	UCGGACCAGGCUUCAAUCCCU	:: ::::.:::::::::: :	AGCUAUUGGAGCCUGGUCCAA	Cleavage	-	-	-	AT5G61020	EVOLUTIONARILY CONSERVED C-TERMINAL REGION 3 (ECT3)	YTHDF protein which togeteher with ECT2 and ECT4 is involved in cell proliferation during plant organogenesis.	-	-	-	21.5785	17.1738	6.72197	4.73532	6.01301	RNA processing	-	0.995505
sbi-miR166.2	Sobic.006G080200	4	-1	80	100	UCGGACCAGGCUUCAUUCCCC	:: :.:::.:.::::::: :	AGGUAGUGAGGUCUGGUCCAA	Cleavage	LOC_Os04g34970	-	-	-	-	-	Zm00001eb422470	-	Ethylene-responsive transcription factor ERF112 family	0.169278	0.573922	4.72316	2.2592	20.9823	-	ERF	-0.488616
sbi-miR166.2	Sobic.004G347500	4.5	-1	1981	2001	UCGGACCAGGCUUCAUUCCCC	:: :::::. : :::::::::	GGAGAAUGGCGACUGGUCCGA	Translation	LOC_Os02g57400	OsLpa1	The proteins encoded by OsLpa1 do not have homology to any of the inositol phosphate metabolism genes recently characterized in plants, although there is homology to 2-phosphoglycerate kinase, an enzyme found in hyperthermophilic methanogens that catalyzes the formation of 2,3-bisphosphoglycerate from 2-phosphoglycerate.	AT5G60760;AT3G45090	-;-	P-loop containing nucleoside triphosphate hydrolases superfamily protein.#(AT5G60760);P-loop containing nucleoside triphosphate hydrolases superfamily protein.#(AT3G45090)	Zm00001eb259060	-	p-loop NTPase domain-containing protein LPA1 homolog 1	61.8035	54.761	35.1226	129.328	204.112	Multi-process regulation	-	-0.421322
sbi-miR166.2	Sobic.007G158500	4.5	-1	298	318	UCGGACCAGGCUUCAUUCCCC	:: :: :::.:.::::::.:	GGUGACUGAGGUCUGGUCUGU	Cleavage	LOC_Os08g37180	-	-	-	-	-	Zm00001eb038250	-	Patatin	0.12239	0.354745	0.0601926	6.69104	36.0602	Lipid metabolism	-	-0.405918
sbi-miR166.2	Sobic.002G277300	4.5	-1	270	290	UCGGACCAGGCUUCAUUCCCC	:::.:::..::: :: ::::	CGGGGAUGGGGCCGGGCCCGA	Cleavage	-	-	-	-	-	-	Zm00001eb319790	-	E3 ubiquitin ligase BIG BROTHER-related	46.7146	38.2066	44.8957	38.565	67.4104	Protein homeostasis	-	-0.334976
sbi-miR166.2	Sobic.003G028300	1	-1	1323	1343	UCGGACCAGGCUUCAUUCCCC	::.:::::::::::::::.	CCGGGAUGAAGCCUGGUCCGG	Cleavage	-	-	-	-	-	-	Zm00001eb337970	-	homeobox-leucine zipper protein ATHB-15-like	2.20719	1.35624	3.00831	1.6285	0.212338	Plant organogenesis;RNA biosynthesis	HD-ZIP	-0.0559444
sbi-miR166.2	Sobic.004G295100	4	-1	71	91	UCGGACCAGGCUUCAUUCCCC	:::::::::.:::: ::	UCUGAAUGAAGCUUGGUGCGC	Cleavage	-	-	-	AT5G47450;AT4G17340	TONOPLAST INTRINSIC PROTEIN 2;3 (TIP2;3)#(AT5G47450);TONOPLAST INTRINSIC PROTEIN 2;2 (TIP2;2)#(AT4G17340)	Tonoplast intrinsic protein, transports ammonium (NH3) and methylammonium across the tonoplast membrane, gene expression shows diurnal regulation and is upregulated by ammonium (NH3).#(AT5G47450);Root expressed tonoplast intrinsic protein.#(AT4G17340)	Zm00001eb186570	-	Aquaporin TIP2-3	10.955	4.32793	3.73365	5.80431	0.362922	Solute transport	-	0.472354
sbi-miR166.2	Sobic.004G283500	3	-1	354	374	UCGGACCAGGCUUCAUUCCCC	:: ::: :::::::::::::	GGUGAAGGAAGCCUGGUCCGU	Cleavage	LOC_Os02g45380	-	-	AT4G23030	-	MATE efflux family protein.	Zm00001eb250520	-	Protein DETOXIFICATION	0.167255	0.113588	0.0927194	0.118187	0	Solute transport	-	0.511801
sbi-miR166.2	Sobic.001G326600	3.5	-1	984	1004	UCGGACCAGGCUUCAUUCCCC	:: :::::: .::::::.::	UGGCAAUGAAUUCUGGUCUGA	Translation	-	-	-	AT1G32660;AT1G30790;AT5G22791;AT3G47150;AT1G70960;AT1G70380;AT1G70970	-;-;-;-;-;-;-	F-box and associated interaction domains-containing protein.#(AT1G32660);F-box and associated interaction domains-containing protein.#(AT1G30790);F-box family protein.#(AT5G22791);F-box and associated interaction domains-containing protein.#(AT3G47150);F-box and associated interaction domains-containing protein.#(AT1G70960);F-box and associated interaction domains-containing protein.#(AT1G70380);…	-	-	-	8.57256	4.74316	3.40776	1.95556	5.73231	-	-	0.570812
sbi-miR166.2	Sobic.009G047800	5	-1	372	392	UCGGACCAGGCUUCAUUCCCC	:::: ::: .:.::: :::::	GGGGCAUGUGGUCUGCUCCGA	Cleavage	LOC_Os05g06060;LOC_Os05g06100;LOC_Os05g06070	-;-;-	-;-;-	-	-	-	-	-	-	0	0.0231342	0	0	0	-	-	0.735894
sbi-miR166.2	Sobic.001G095900	3.5	-1	239	259	UCGGACCAGGCUUCAUUCCCC	::::::::: :.: :::::::	GGGGAAUGAUGUCCGGUCCGA	Cleavage	-	-	-	-	-	-	-	-	-	0.0820847	0.0331573	0.00903038	0	0	-	-	0.749458
sbi-miR166.2	Sobic.001G096200	4.5	-1	1065	1086	UCGGACC-AGGCUUCAUUCCCC	::.::::::::: :::.::.	AUGGGAUGAAGCCUUGGUUCGG	Cleavage	LOC_Os12g33240	-	-	-	-	-	Zm00001eb056700	RPS10	Ribosomal protein S10	8.97846	11.1242	7.65342	6.28655	2.81601	Protein biosynthesis	-	0.760938
sbi-miR166.2	Sobic.007G116500	4	-1	5004	5024	UCGGACCAGGCUUCAUUCCCC	.::::.::.::::.:::	UUAAGAUGAGGCUUGGUUCGA	Cleavage	LOC_Os08g29150	-	-	-	-	-	Zm00001eb042570	-	Phospholipid-transporting ATPase	4.17008	14.3551	3.15556	1.21035	0.264514	Enzyme classification;Lipid metabolism;Solute transport	-	0.825169
sbi-miR166.2	Sobic.002G147900	4.5	-1	1088	1108	UCGGACCAGGCUUCAUUCCCC	::::.::::: ::::..::	UGGGAGUGAAGAGUGGUUUGA	Translation	-	-	-	AT4G02210;AT2G24960	-;-	Myb/SANT-like DNA-binding domain protein.#(AT4G02210);Myb/SANT-like DNA-binding domain protein.#(AT2G24960)	Zm00001eb178060;Zm00001eb035520;Zm00001eb386100;Zm00001eb180120;Zm00001eb136780;Zm00001eb090020	-;-;-;LOC100274391#(Zm00001eb180120);-;LOC100274391#(Zm00001eb090020)	-;CAI-1 autoinducer sensor kinase/phosphatase cqsS isoform 1.#(Zm00001eb035520);CAI-1 autoinducer sensor kinase/phosphatase cqsS isoform 1.#(Zm00001eb386100);ACT domain-containing protein ACR4.#(Zm00001eb180120);-;ACT domain-containing protein ACR4.#(Zm00001eb090020)	1.48622	0.804731	0.178468	0.0969283	0.0172053	-	-	0.825415
sbi-miR166.2	Sobic.001G157400	1	-1	866	886	UCGGACCAGGCUUCAUUCCCC	::.:::::::::::::::.	UUGGGAUGAAGCCUGGUCCGG	Cleavage	LOC_Os03g43930;LOC_Os03g43930;LOC_Os03g43930;LOC_Os03g43930;LOC_Os03g43930;LOC_Os03g43930;LOC_Os03g43930;LOC_Os03g43930;LOC_Os03g43930;LOC_Os03g43930;LOC_Os03g43930;LOC_Os03g43930;LOC_Os03g43930;LOC_Os03g43930;LOC_Os03g43930;LOC_Os03g43930;LOC_Os03g43930;LOC_Os03g43930;LOC_Os03g43930;LOC_Os03g43930;LOC_Os03g43930;LOC_Os03g43930;LOC_Os03g43930;LOC_Os03g43930;LOC_Os03g43930;LOC_Os03g43930;LOC_Os03g…	OSHB4|OsHox32#(LOC_Os03g43930);OSHB4|OsHox32#(LOC_Os03g43930);OSHB4|OsHox32#(LOC_Os03g43930);OSHB4|OsHox32#(LOC_Os03g43930);OSHB4|OsHox32#(LOC_Os03g43930);OSHB4|OsHox32#(LOC_Os03g43930);OSHB4|OsHox32#(LOC_Os03g43930);OSHB4|OsHox32#(LOC_Os03g43930);OSHB4|OsHox32#(LOC_Os03g43930);OSHB4|OsHox32#(LOC_Os03g43930);OSHB4|OsHox32#(LOC_Os03g43930);OSHB4|OsHox32#(LOC_Os03g43930);OSHB4|OsHox32#(LOC_Os03g439…	Direct regulation of other transcription factor genes like OsHB4 (a class III homeodomain Leu zipper member), OsBLH1 (a BEL1-like homeodomain member), OsKANADI2, OsKANADI4, and OsETTIN2 show its role in meristem maintenance, determinacy, and lateral organ development.#(transcription factor#(OSHB4|OsHox32#(LOC_Os03g43930)));Direct regulation of other transcription factor genes like OsHB4 (a class …	AT1G30490;AT2G34710	PHAVOLUTA (PHV)#(AT1G30490);PHABULOSA (PHB)#(AT2G34710)	Dominant PHV mutations cause transformation of abaxial leaf fates into adaxial leaf fates. Has overlapping functions with PHABULOSA, REVOLUTA and CORONA/ATHB15 in patterning the apical portion of the embryo. Encodes a member of HD-Zip family which contains homeodomain-leucine zipper domains and domain similar to a mammalian sterol binding domain.#(AT1G30490);Dominant PHB mutations cause transform…	Zm00001eb050660	-	Homeobox-leucine zipper protein HOX32	17.8439	51.67	12.0125	7.65035	1.88076	Plant organogenesis;RNA biosynthesis	HD-ZIP	0.84269
sbi-miR166.2	Sobic.010G253000	4.5	-1	906	926	UCGGACCAGGCUUCAUUCCCC	:: :::::. :::: ::::::	GGAGAAUGGCGCCUUGUCCGA	Cleavage	LOC_Os06g48930	-	-	-	-	-	-	-	-	34.8939	23.8575	8.7531	4.32088	1.67332	-	-	0.86192
sbi-miR166.2	Sobic.003G370600	4.5	-1	1286	1306	UCGGACCAGGCUUCAUUCCCC	:::: : :.:::::::: .::	GGGGUAGGGAGCCUGGUGUGA	Cleavage	-	-	-	AT1G34340	-	alpha/beta-Hydrolases superfamily protein.	-	-	-	0.1398	0.0829594	0.00561066	0.00376743	0	-	-	0.870091
sbi-miR166.2	Sobic.006G018800	4	-1	659	679	UCGGACCAGGCUUCAUUCCCC	: ::::::::::::::. :	AGUGAAUGAAGCCUGGUUGGU	Cleavage	LOC_Os04g08740;LOC_Os04g08740;LOC_Os04g08740;LOC_Os04g08740;LOC_Os04g08740;LOC_Os04g08740;LOC_Os04g08740;LOC_Os04g08740;LOC_Os04g08740;LOC_Os04g08740;LOC_Os04g08740;LOC_Os04g08740;LOC_Os04g08740;LOC_Os04g08740;LOC_Os04g08740;LOC_Os04g08740;LOC_Os04g08740;LOC_Os04g08740;LOC_Os04g08740;LOC_Os04g08740;LOC_Os04g08740;LOC_Os04g08740;LOC_Os04g08740;LOC_Os04g08740;LOC_Os04g08740;LOC_Os04g08740;LOC_Os04g…	ETR2|Os-ERL1|OsETR2#(LOC_Os04g08740);ETR2|Os-ERL1|OsETR2#(LOC_Os04g08740);ETR2|Os-ERL1|OsETR2#(LOC_Os04g08740);ETR2|Os-ERL1|OsETR2#(LOC_Os04g08740);ETR2|Os-ERL1|OsETR2#(LOC_Os04g08740);ETR2|Os-ERL1|OsETR2#(LOC_Os04g08740);ETR2|Os-ERL1|OsETR2#(LOC_Os04g08740);ETR2|Os-ERL1|OsETR2#(LOC_Os04g08740);ETR2|Os-ERL1|OsETR2#(LOC_Os04g08740);ETR2|Os-ERL1|OsETR2#(LOC_Os04g08740);ETR2|Os-ERL1|OsETR2#(LOC_Os04…	The effective panicles and seed-setting rate were reduced in the ETR2-overexpressing plants, while thousand-seed weight was substantially enhanced in both the ETR2-RNAi plants and the etr2 mutant compared with controls.#(panicle#(ETR2|Os-ERL1|OsETR2#(LOC_Os04g08740)));Here, we characterized a subfamily II ethylene receptor, ETHYLENE RESPONSE2 (ETR2), in rice (Oryza sativa).#(ethylene#(ETR2|Os-ERL…	AT3G04580	ETHYLENE INSENSITIVE 4 (EIN4)	Ethylene receptor, subfamily 2. Has serine kinase activity.	Zm00001eb419810	-	Ethylene receptor	67.1563	52.7851	24.2168	11.3812	6.49272	Enzyme classification;Phytohormone action.ethylene	-	0.875804
sbi-miR166.2	Sobic.001G217200	1	-1	1044	1064	UCGGACCAGGCUUCAUUCCCC	::.:::::::::::::::.	CUGGGAUGAAGCCUGGUCCGG	Cleavage	-	-	-	AT5G60690	REVOLUTA (REV)	REVOLUTA regulates meristem initiation at lateral positions. a member of a small homeodomain-leucine zipper family. Has overlapping functions with PHAVOLUTA and PHABULOSA. The mRNA is cell-to-cell mobile.	Zm00001eb045630	-	Rolled leaf2	13.3201	23.8536	7.77403	3.56918	0.547548	Plant organogenesis;RNA biosynthesis	HD-ZIP	0.896198
sbi-miR166.2	Sobic.008G168100	1	-1	869	889	UCGGACCAGGCUUCAUUCCCC	::.:::::::::::::::.	UUGGGAUGAAGCCUGGUCCGG	Cleavage	-	-	-	AT1G30490;AT2G34710	PHAVOLUTA (PHV)#(AT1G30490);PHABULOSA (PHB)#(AT2G34710)	Dominant PHV mutations cause transformation of abaxial leaf fates into adaxial leaf fates. Has overlapping functions with PHABULOSA, REVOLUTA and CORONA/ATHB15 in patterning the apical portion of the embryo. Encodes a member of HD-Zip family which contains homeodomain-leucine zipper domains and domain similar to a mammalian sterol binding domain.#(AT1G30490);Dominant PHB mutations cause transform…	Zm00001eb136060	-	Homeobox-leucine zipper protein ATHB-14	23.1007	46.5657	10.4933	9.07631	2.63194	Plant organogenesis;RNA biosynthesis	HD-ZIP	0.912414
sbi-miR166.2	Sobic.006G201300	4.5	-1	3843	3863	UCGGACCAGGCUUCAUUCCCC	:::.:::::::. : ::.::	CGGGGAUGAAGCUGGCUCUGA	Cleavage	LOC_Os04g50960	-	-	-	-	-	Zm00001eb430160	-	-	31.3744	32.3503	3.4892	13.0725	0	-	-	0.928276
sbi-miR166.2	Sobic.001G215400	3.5	-1	1307	1327	UCGGACCAGGCUUCAUUCCCC	: :::::::::::.:::	AACAACUGAAGCCUGGUUCGA	Cleavage	LOC_Os10g34300	-	-	AT1G14315	-	F-box and associated interaction domains-containing protein.	-	-	-	41.6062	34.8421	13.4275	10.3486	17.4472	-	-	0.928545
sbi-miR166.2	Sobic.006G096100	3.5	-1	439	459	UCGGACCAGGCUUCAUUCCCC	: : :::::::: :::::::	UGUGCAUGAAGCCCGGUCCGA	Cleavage	-	-	-	-	-	-	-	-	-	0.0951917	0.0784271	0	0	0.025619	Enzyme classification	-	0.940121
sbi-miR166.2	Sobic.004G048800	3.5	-1	1833	1853	UCGGACCAGGCUUCAUUCCCC	:::.:::: :::::::: :	UUGGAGUGAAACCUGGUCCAA	Translation	LOC_Os02g06500	-	-	AT3G46960	(SKI2)	The gene encodes a DExD&#8260;H box RNA helicase, involved in the regulation of K+ deprivation stress response.SKI2 encodes the RNA helicase subunit of the SKI complex. Mutation of SKI2 leads to production of secondary siRNAs from miRNA target transcripts.	Zm00001eb232660	-	DExH-box ATP-dependent RNA helicase DExH11	68.1705	72.8606	22.3658	14.7568	5.32657	RNA processing	-	0.951563
sbi-miR166.2	Sobic.001G537300	1	-1	681	701	UCGGACCAGGCUUCAUUCCCC	::.:::::::::::::::.	CUGGGAUGAAGCCUGGUCCGG	Cleavage	LOC_Os03g01890;LOC_Os03g01890;LOC_Os03g01890;LOC_Os03g01890;LOC_Os03g01890;LOC_Os03g01890;LOC_Os03g01890;LOC_Os03g01890;LOC_Os03g01890;LOC_Os03g01890;LOC_Os03g01890;LOC_Os03g01890;LOC_Os03g01890;LOC_Os03g01890	OSHB1|LF1#(LOC_Os03g01890);OSHB1|LF1#(LOC_Os03g01890);OSHB1|LF1#(LOC_Os03g01890);OSHB1|LF1#(LOC_Os03g01890);OSHB1|LF1#(LOC_Os03g01890);OSHB1|LF1#(LOC_Os03g01890);OSHB1|LF1#(LOC_Os03g01890);OSHB1|LF1#(LOC_Os03g01890);OSHB1|LF1#(LOC_Os03g01890);OSHB1|LF1#(LOC_Os03g01890);OSHB1|LF1#(LOC_Os03g01890);OSHB1|LF1#(LOC_Os03g01890);OSHB1|LF1#(LOC_Os03g01890);OSHB1|LF1#(LOC_Os03g01890)	Four genes, OSHB1 to OSHB4, were expressed in a localized domain of the shoot apical meristem (SAM), the adaxial cells of leaf primordia, the leaf margins, and the xylem tissue of vascular bundles.#(shoot apical meristem#(OSHB1|LF1#(LOC_Os03g01890)));Four genes, OSHB1 to OSHB4, were expressed in a localized domain of the shoot apical meristem (SAM), the adaxial cells of leaf primordia, the leaf m…	AT5G60690	REVOLUTA (REV)	REVOLUTA regulates meristem initiation at lateral positions. a member of a small homeodomain-leucine zipper family. Has overlapping functions with PHAVOLUTA and PHABULOSA. The mRNA is cell-to-cell mobile.	Zm00001eb404260	-	Rolled leaf 2	47.6631	71.5087	13.5713	6.23702	1.41613	Plant organogenesis;RNA biosynthesis	HD-ZIP	0.965139
sbi-miR166.2	Sobic.010G017800	4.5	-1	1490	1510	UCGGACCAGGCUUCAUUCCCC	::: .:::: ::.::::..::	GGGAGAUGAUGCUUGGUUUGA	Cleavage	LOC_Os06g03760	-	-	AT5G01460;AT3G08930	-;-	LMBR1-like membrane protein.#(AT5G01460);LMBR1-like membrane protein.#(AT3G08930)	Zm00001eb269470;Zm00001eb378570	-;-	LMBR1 integral membrane family protein.#(Zm00001eb269470);LMBR1 integral membrane family protein.#(Zm00001eb378570)	91.8239	121.006	24.0941	14.1596	6.45474	-	-	0.975816
sbi-miR166.2	Sobic.004G337925	4	-1	1033	1053	UCGGACCAGGCUUCAUUCCCC	:::::::::::::: :.	CUACAAUGAAGCCUGGUCAGG	Cleavage	LOC_Os02g56280	-	-	AT5G60710	-	Zinc finger (C3HC4-type RING finger) family protein.	Zm00001eb191920	-	E3 ubiquitin-protein ligase WAV3	18.8858	22.0696	3.81989	2.99742	0.931948	-	-	0.978242
sbi-miR166.2	Sobic.006G000600	3.5	-1	1271	1291	UCGGACCAGGCUUCAUUCCCC	::: . ::::.::::::.::	AGGGUGGGAAGUCUGGUCUGA	Cleavage	LOC_Os01g72990	-	-	AT1G06840	HDS-ASSOCIATED RLK1 (HAK1)	Homomultimers interact with cytoplasmic signaling molecule PBL27, resulting in herbivory resistance, in an ethylene-dependent manner.	Zm00001eb089740	LOC103646897	Protein kinase domain-containing protein	17.7852	20.4485	5.20757	3.78641	3.03528	Enzyme classification;Protein modification	-	0.980265
sbi-miR166.3	Sobic.009G154600	5	-1	1153	1174	UCGGACCAGGCUUCAU-UCCUC	::::: :::::::: :: ::::	GAGGACAUGAAGCCCGGCCCGA	Cleavage	-	-	-	AT2G27500	(BG14)	Encodes a glycosylphosphatidylinositol-anchored &#946;-1,3-glucanase involved in seed developement.	Zm00001eb348300	-	Glucan endo-1	0.0973473	0.478984	2.36259	3.99402	1.54998	Enzyme classification	-	-0.828084
sbi-miR166.3	Sobic.006G080200	5	-1	79	100	UCGGACCAGGCUUCAUU-CCUC	:::: :.:::.:.::::::: :	GAGGUAGUGAGGUCUGGUCCAA	Cleavage	LOC_Os04g34970	-	-	-	-	-	Zm00001eb422470	-	Ethylene-responsive transcription factor ERF112 family	0.169278	0.573922	4.72316	2.2592	20.9823	-	ERF	-0.56253
sbi-miR166.3	Sobic.003G028300	1	-1	1323	1343	UCGGACCAGGCUUCAUUCCUC	::.:::::::::::::::.	CCGGGAUGAAGCCUGGUCCGG	Cleavage	-	-	-	-	-	-	Zm00001eb337970	-	homeobox-leucine zipper protein ATHB-15-like	2.20719	1.35624	3.00831	1.6285	0.212338	Plant organogenesis;RNA biosynthesis	HD-ZIP	0.129004
sbi-miR166.3	Sobic.004G283500	3	-1	354	374	UCGGACCAGGCUUCAUUCCUC	:. ::: :::::::::::::	GGUGAAGGAAGCCUGGUCCGU	Cleavage	LOC_Os02g45380	-	-	AT4G23030	-	MATE efflux family protein.	Zm00001eb250520	-	Protein DETOXIFICATION	0.167255	0.113588	0.0927194	0.118187	0	Solute transport	-	0.659997
sbi-miR166.3	Sobic.001G042700	4.5	-1	1865	1885	UCGGACCAGGCUUCAUUCCUC	::: ::::::::::: ::. :	GAGAAAUGAAGCCUGUUCUAA	Cleavage	-	-	-	-	-	-	-	-	-	0.203388	0.744343	0.0377168	0.0941122	0.0946556	-	-	0.661816
sbi-miR166.3	Sobic.007G116500	4	-1	5004	5024	UCGGACCAGGCUUCAUUCCUC	.::::.::.::::.:::	UUAAGAUGAGGCUUGGUUCGA	Cleavage	LOC_Os08g29150	-	-	-	-	-	Zm00001eb042570	-	Phospholipid-transporting ATPase	4.17008	14.3551	3.15556	1.21035	0.264514	Enzyme classification;Lipid metabolism;Solute transport	-	0.665008
sbi-miR166.3	Sobic.004G295100	4	-1	71	91	UCGGACCAGGCUUCAUUCCUC	:::::::::.:::: ::	UCUGAAUGAAGCUUGGUGCGC	Cleavage	-	-	-	AT5G47450;AT4G17340	TONOPLAST INTRINSIC PROTEIN 2;3 (TIP2;3)#(AT5G47450);TONOPLAST INTRINSIC PROTEIN 2;2 (TIP2;2)#(AT4G17340)	Tonoplast intrinsic protein, transports ammonium (NH3) and methylammonium across the tonoplast membrane, gene expression shows diurnal regulation and is upregulated by ammonium (NH3).#(AT5G47450);Root expressed tonoplast intrinsic protein.#(AT4G17340)	Zm00001eb186570	-	Aquaporin TIP2-3	10.955	4.32793	3.73365	5.80431	0.362922	Solute transport	-	0.685953
sbi-miR166.3	Sobic.001G157400	1	-1	866	886	UCGGACCAGGCUUCAUUCCUC	::.:::::::::::::::.	UUGGGAUGAAGCCUGGUCCGG	Cleavage	LOC_Os03g43930;LOC_Os03g43930;LOC_Os03g43930;LOC_Os03g43930;LOC_Os03g43930;LOC_Os03g43930;LOC_Os03g43930;LOC_Os03g43930;LOC_Os03g43930;LOC_Os03g43930;LOC_Os03g43930;LOC_Os03g43930;LOC_Os03g43930;LOC_Os03g43930;LOC_Os03g43930;LOC_Os03g43930;LOC_Os03g43930;LOC_Os03g43930;LOC_Os03g43930;LOC_Os03g43930;LOC_Os03g43930;LOC_Os03g43930;LOC_Os03g43930;LOC_Os03g43930;LOC_Os03g43930;LOC_Os03g43930;LOC_Os03g…	OSHB4|OsHox32#(LOC_Os03g43930);OSHB4|OsHox32#(LOC_Os03g43930);OSHB4|OsHox32#(LOC_Os03g43930);OSHB4|OsHox32#(LOC_Os03g43930);OSHB4|OsHox32#(LOC_Os03g43930);OSHB4|OsHox32#(LOC_Os03g43930);OSHB4|OsHox32#(LOC_Os03g43930);OSHB4|OsHox32#(LOC_Os03g43930);OSHB4|OsHox32#(LOC_Os03g43930);OSHB4|OsHox32#(LOC_Os03g43930);OSHB4|OsHox32#(LOC_Os03g43930);OSHB4|OsHox32#(LOC_Os03g43930);OSHB4|OsHox32#(LOC_Os03g439…	Direct regulation of other transcription factor genes like OsHB4 (a class III homeodomain Leu zipper member), OsBLH1 (a BEL1-like homeodomain member), OsKANADI2, OsKANADI4, and OsETTIN2 show its role in meristem maintenance, determinacy, and lateral organ development.#(transcription factor#(OSHB4|OsHox32#(LOC_Os03g43930)));Direct regulation of other transcription factor genes like OsHB4 (a class …	AT1G30490;AT2G34710	PHAVOLUTA (PHV)#(AT1G30490);PHABULOSA (PHB)#(AT2G34710)	Dominant PHV mutations cause transformation of abaxial leaf fates into adaxial leaf fates. Has overlapping functions with PHABULOSA, REVOLUTA and CORONA/ATHB15 in patterning the apical portion of the embryo. Encodes a member of HD-Zip family which contains homeodomain-leucine zipper domains and domain similar to a mammalian sterol binding domain.#(AT1G30490);Dominant PHB mutations cause transform…	Zm00001eb050660	-	Homeobox-leucine zipper protein HOX32	17.8439	51.67	12.0125	7.65035	1.88076	Plant organogenesis;RNA biosynthesis	HD-ZIP	0.69038
sbi-miR166.3	Sobic.004G290800	4.5	-1	67	87	UCGGACCAGGCUUCAUUCCUC	:::::. ::.:::: :::.:.	GAGGAGGGAGGCCUAGUCUGG	Cleavage	LOC_Os02g44360;LOC_Os02g44370	-;-	-;-	AT2G45160;AT3G60630;AT4G00150	HAIRY MERISTEM 1 (HAM1)#(AT2G45160);HAIRY MERISTEM 2 (HAM2)#(AT3G60630);HAIRY MERISTEM 3 (HAM3)#(AT4G00150)	Belongs to one of the LOM (LOST MERISTEMS) genes: AT2G45160 (LOM1), AT3G60630 (LOM2) and AT4G00150 (LOM3). LOM1 and LOM2 promote cell differentiation at the periphery of shoot meristems and help to maintain their polar organization.#(AT2G45160);Belongs to one of the LOM (LOST MERISTEMS) genes: AT2G45160 (LOM1), AT3G60630 (LOM2) and AT4G00150 (LOM3). LOM1 and LOM2 promote cell differentiation at t…	Zm00001eb186770	-	Scarecrow-like protein 6	21.347	28.2585	21.8471	6.05433	3.41007	RNA biosynthesis	GRAS	0.697611
sbi-miR166.3	Sobic.001G326600	3.5	-1	984	1004	UCGGACCAGGCUUCAUUCCUC	.: :::::: .::::::.::	UGGCAAUGAAUUCUGGUCUGA	Translation	-	-	-	AT1G32660;AT1G30790;AT5G22791;AT3G47150;AT1G70960;AT1G70380;AT1G70970	-;-;-;-;-;-;-	F-box and associated interaction domains-containing protein.#(AT1G32660);F-box and associated interaction domains-containing protein.#(AT1G30790);F-box family protein.#(AT5G22791);F-box and associated interaction domains-containing protein.#(AT3G47150);F-box and associated interaction domains-containing protein.#(AT1G70960);F-box and associated interaction domains-containing protein.#(AT1G70380);…	-	-	-	8.57256	4.74316	3.40776	1.95556	5.73231	-	-	0.709047
sbi-miR166.3	Sobic.008G168100	1	-1	869	889	UCGGACCAGGCUUCAUUCCUC	::.:::::::::::::::.	UUGGGAUGAAGCCUGGUCCGG	Cleavage	-	-	-	AT1G30490;AT2G34710	PHAVOLUTA (PHV)#(AT1G30490);PHABULOSA (PHB)#(AT2G34710)	Dominant PHV mutations cause transformation of abaxial leaf fates into adaxial leaf fates. Has overlapping functions with PHABULOSA, REVOLUTA and CORONA/ATHB15 in patterning the apical portion of the embryo. Encodes a member of HD-Zip family which contains homeodomain-leucine zipper domains and domain similar to a mammalian sterol binding domain.#(AT1G30490);Dominant PHB mutations cause transform…	Zm00001eb136060	-	Homeobox-leucine zipper protein ATHB-14	23.1007	46.5657	10.4933	9.07631	2.63194	Plant organogenesis;RNA biosynthesis	HD-ZIP	0.797812
sbi-miR166.3	Sobic.001G217200	1	-1	1044	1064	UCGGACCAGGCUUCAUUCCUC	::.:::::::::::::::.	CUGGGAUGAAGCCUGGUCCGG	Cleavage	-	-	-	AT5G60690	REVOLUTA (REV)	REVOLUTA regulates meristem initiation at lateral positions. a member of a small homeodomain-leucine zipper family. Has overlapping functions with PHAVOLUTA and PHABULOSA. The mRNA is cell-to-cell mobile.	Zm00001eb045630	-	Rolled leaf2	13.3201	23.8536	7.77403	3.56918	0.547548	Plant organogenesis;RNA biosynthesis	HD-ZIP	0.815965
sbi-miR166.3	Sobic.001G537300	1	-1	681	701	UCGGACCAGGCUUCAUUCCUC	::.:::::::::::::::.	CUGGGAUGAAGCCUGGUCCGG	Cleavage	LOC_Os03g01890;LOC_Os03g01890;LOC_Os03g01890;LOC_Os03g01890;LOC_Os03g01890;LOC_Os03g01890;LOC_Os03g01890;LOC_Os03g01890;LOC_Os03g01890;LOC_Os03g01890;LOC_Os03g01890;LOC_Os03g01890;LOC_Os03g01890;LOC_Os03g01890	OSHB1|LF1#(LOC_Os03g01890);OSHB1|LF1#(LOC_Os03g01890);OSHB1|LF1#(LOC_Os03g01890);OSHB1|LF1#(LOC_Os03g01890);OSHB1|LF1#(LOC_Os03g01890);OSHB1|LF1#(LOC_Os03g01890);OSHB1|LF1#(LOC_Os03g01890);OSHB1|LF1#(LOC_Os03g01890);OSHB1|LF1#(LOC_Os03g01890);OSHB1|LF1#(LOC_Os03g01890);OSHB1|LF1#(LOC_Os03g01890);OSHB1|LF1#(LOC_Os03g01890);OSHB1|LF1#(LOC_Os03g01890);OSHB1|LF1#(LOC_Os03g01890)	Four genes, OSHB1 to OSHB4, were expressed in a localized domain of the shoot apical meristem (SAM), the adaxial cells of leaf primordia, the leaf margins, and the xylem tissue of vascular bundles.#(shoot apical meristem#(OSHB1|LF1#(LOC_Os03g01890)));Four genes, OSHB1 to OSHB4, were expressed in a localized domain of the shoot apical meristem (SAM), the adaxial cells of leaf primordia, the leaf m…	AT5G60690	REVOLUTA (REV)	REVOLUTA regulates meristem initiation at lateral positions. a member of a small homeodomain-leucine zipper family. Has overlapping functions with PHAVOLUTA and PHABULOSA. The mRNA is cell-to-cell mobile.	Zm00001eb404260	-	Rolled leaf 2	47.6631	71.5087	13.5713	6.23702	1.41613	Plant organogenesis;RNA biosynthesis	HD-ZIP	0.909036
sbi-miR166.3	Sobic.001G095900	3.5	-1	239	259	UCGGACCAGGCUUCAUUCCUC	:.::::::: :.: :::::::	GGGGAAUGAUGUCCGGUCCGA	Cleavage	-	-	-	-	-	-	-	-	-	0.0820847	0.0331573	0.00903038	0	0	-	-	0.916658
sbi-miR166.3	Sobic.002G229900	4	-1	671	691	UCGGACCAGGCUUCAUUCCUC	:: :.:::::.::::: ::.	CAGCAGUGAAGUCUGGUGCGG	Cleavage	LOC_Os08g37270	-	-	AT1G62970;AT2G01710	SUVH1/3-INTERACTING DNAJ DOMAIN-CONTAINING PROTEIN 3 (SDJ3)#(AT1G62970);SUVH1/3-INTERACTING DNAJ DOMAIN-CONTAINING PROTEIN 2 (SDJ2)#(AT2G01710)	SDJ3 functions partially redundantly with SDJ1 and SDJ2 and interacts with SUVH1 and SUVH3 to form a SUVH-SDJ complex. The complex binds promoters with DNA methylation and mediates transcriptional activation of promoter methylated genes.#(AT1G62970);SDJ2 functions partially redundantly with SDJ1 and SDJ3 and interacts with SUVH1 and SUVH3 to form a SUVH-SDJ complex. The complex binds promoters wi…	Zm00001eb315320	-	Proline-rich extensin-like protein EPR1	21.3871	17.1256	12.0729	7.12484	5.39563	Chromatin organisation	-	0.927079
sbi-miR166.3	Sobic.003G433750	4	-1	1104	1124	UCGGACCAGGCUUCAUUCCUC	::::: ::::::::::: : :	GAGGACUGAAGCCUGGUGCCA	Cleavage	LOC_Os01g72940	-	-	AT5G57190;AT4G25970	PHOSPHATIDYLSERINE DECARBOXYLASE 2 (PSD2)#(AT5G57190);PHOSPHATIDYLSERINE DECARBOXYLASE 3 (PSD3)#(AT4G25970)	Encodes the minor form of the two non-mitochondrail phosphatidylserine decarboxylase. The gene expression level is very low. Located at the tonoplast.#(AT5G57190);Encodes the major form of the two non-mitochondrail phosphatidylserine decarboxylase. Located at the ER. The mRNA is cell-to-cell mobile.#(AT4G25970)	Zm00001eb362570	PSD2	Phosphatidylserine decarboxylase proenzyme 2	49.3702	70.0204	9.84348	5.90765	2.07932	Lipid metabolism	-	0.93013
sbi-miR166.3	Sobic.001G226700	4	-1	1096	1116	UCGGACCAGGCUUCAUUCCUC	:: :::::::..::::..:	UAGUAAUGAAGUUUGGUUUGU	Cleavage	-	-	-	-	-	-	Zm00001eb046310	-	WD repeat-containing protein WDS homolog	15.4998	17.8207	5.64306	4.25686	2.87591	Protein homeostasis	-	0.961466
sbi-miR166.3	Sobic.004G337925	4	-1	1033	1053	UCGGACCAGGCUUCAUUCCUC	:::::::::::::: :.	CUACAAUGAAGCCUGGUCAGG	Cleavage	LOC_Os02g56280	-	-	AT5G60710	-	Zinc finger (C3HC4-type RING finger) family protein.	Zm00001eb191920	-	E3 ubiquitin-protein ligase WAV3	18.8858	22.0696	3.81989	2.99742	0.931948	-	-	0.966756
sbi-miR166.3	Sobic.004G048800	3.5	-1	1833	1853	UCGGACCAGGCUUCAUUCCUC	:::.:::: :::::::: :	UUGGAGUGAAACCUGGUCCAA	Translation	LOC_Os02g06500	-	-	AT3G46960	(SKI2)	The gene encodes a DExD&#8260;H box RNA helicase, involved in the regulation of K+ deprivation stress response.SKI2 encodes the RNA helicase subunit of the SKI complex. Mutation of SKI2 leads to production of secondary siRNAs from miRNA target transcripts.	Zm00001eb232660	-	DExH-box ATP-dependent RNA helicase DExH11	68.1705	72.8606	22.3658	14.7568	5.32657	RNA processing	-	0.967213
sbi-miR166.3	Sobic.001G158000	5	-1	146	166	UCGGACCAGGCUUCAUUCCUC	:::::: :.:::::: :: :.	GAGGAACGGAGCCUGCUCAGG	Cleavage	LOC_Os11g47770	-	-	-	-	-	Zm00001eb409020	-	selenoprotein H	2.61981	2.36636	0.878541	0.329683	0.0486287	-	-	0.968295
sbi-miR166.3	Sobic.006G018800	5	-1	658	679	UCGGACCAGGCUUCAUUC-CUC	::: ::::::::::::::. :	GAGUGAAUGAAGCCUGGUUGGU	Cleavage	LOC_Os04g08740;LOC_Os04g08740;LOC_Os04g08740;LOC_Os04g08740;LOC_Os04g08740;LOC_Os04g08740;LOC_Os04g08740;LOC_Os04g08740;LOC_Os04g08740;LOC_Os04g08740;LOC_Os04g08740;LOC_Os04g08740;LOC_Os04g08740;LOC_Os04g08740;LOC_Os04g08740;LOC_Os04g08740;LOC_Os04g08740;LOC_Os04g08740;LOC_Os04g08740;LOC_Os04g08740;LOC_Os04g08740;LOC_Os04g08740;LOC_Os04g08740;LOC_Os04g08740;LOC_Os04g08740;LOC_Os04g08740;LOC_Os04g…	ETR2|Os-ERL1|OsETR2#(LOC_Os04g08740);ETR2|Os-ERL1|OsETR2#(LOC_Os04g08740);ETR2|Os-ERL1|OsETR2#(LOC_Os04g08740);ETR2|Os-ERL1|OsETR2#(LOC_Os04g08740);ETR2|Os-ERL1|OsETR2#(LOC_Os04g08740);ETR2|Os-ERL1|OsETR2#(LOC_Os04g08740);ETR2|Os-ERL1|OsETR2#(LOC_Os04g08740);ETR2|Os-ERL1|OsETR2#(LOC_Os04g08740);ETR2|Os-ERL1|OsETR2#(LOC_Os04g08740);ETR2|Os-ERL1|OsETR2#(LOC_Os04g08740);ETR2|Os-ERL1|OsETR2#(LOC_Os04…	The effective panicles and seed-setting rate were reduced in the ETR2-overexpressing plants, while thousand-seed weight was substantially enhanced in both the ETR2-RNAi plants and the etr2 mutant compared with controls.#(panicle#(ETR2|Os-ERL1|OsETR2#(LOC_Os04g08740)));Here, we characterized a subfamily II ethylene receptor, ETHYLENE RESPONSE2 (ETR2), in rice (Oryza sativa).#(ethylene#(ETR2|Os-ERL…	AT3G04580	ETHYLENE INSENSITIVE 4 (EIN4)	Ethylene receptor, subfamily 2. Has serine kinase activity.	Zm00001eb419810	-	Ethylene receptor	67.1563	52.7851	24.2168	11.3812	6.49272	Enzyme classification;Phytohormone action.ethylene	-	0.968829
sbi-miR166.3	Sobic.001G215400	3.5	-1	1307	1327	UCGGACCAGGCUUCAUUCCUC	: :::::::::::.:::	AACAACUGAAGCCUGGUUCGA	Cleavage	LOC_Os10g34300	-	-	AT1G14315	-	F-box and associated interaction domains-containing protein.	-	-	-	41.6062	34.8421	13.4275	10.3486	17.4472	-	-	0.982085
sbi-miR166.3	Sobic.001G194200	4.5	-1	2244	2265	UCGGACCAGGCUUCAU-UCCUC	::::: :: .:::.:::::.::	GAGGACAUUGAGCUUGGUCUGA	Cleavage	LOC_Os10g37280;LOC_Os10g37280;LOC_Os10g37280;LOC_Os10g37280;LOC_Os10g37280;LOC_Os10g37280;LOC_Os10g37280;LOC_Os10g37280;LOC_Os10g37280	OsLCBK1#(LOC_Os10g37280);OsLCBK1#(LOC_Os10g37280);OsLCBK1#(LOC_Os10g37280);OsLCBK1#(LOC_Os10g37280);OsLCBK1#(LOC_Os10g37280);OsLCBK1#(LOC_Os10g37280);OsLCBK1#(LOC_Os10g37280);OsLCBK1#(LOC_Os10g37280);OsLCBK1#(LOC_Os10g37280)	Expression of OsLCBK1 and OsLCBK2 was induced in rice seedlings after treatments with defense signaling molecules and after infection by Magnaporthe grisea, the causal agent of blast disease.#(blast disease#(OsLCBK1#(LOC_Os10g37280)));Transgenic tobacco plants overexpressing OsLCBK1 were generated and disease resistance assays indicate that the OsLCBK1-overexpressing plants showed enhanced diseas…	-	-	-	Zm00001eb043540	LOC103643367	Sphingoid long-chain bases kinase 1	18.5795	19.3331	5.02145	4.8365	3.1269	Enzyme classification;Lipid metabolism	-	0.983802
sbi-miR166.3	Sobic.003G243600	4.5	-1	12	33	UCGGACCAG-GCUUCAUUCCUC	::::: ::::: :::::.:::	CAGGAAAGAAGCGCUGGUUCGA	Cleavage	LOC_Os01g46926;LOC_Os01g46926;LOC_Os01g46926;LOC_Os01g46926;LOC_Os01g46926	OsUBC5a#(LOC_Os01g46926);OsUBC5a#(LOC_Os01g46926);OsUBC5a#(LOC_Os01g46926);OsUBC5a#(LOC_Os01g46926);OsUBC5a#(LOC_Os01g46926)	SPL35 directly interacts with the E2 protein OsUBC5a and the coatomer subunit delta proteins Delta-COP1 and Delta-COP2 through the CUE domain, and down-regulation of these interacting proteins also cause development of HR-like lesions resembling those in spl35 and activation of defence responses, indicating that SPL35 may be involved in the ubiquitination and vesicular trafficking pathways.#(deve…	-	-	-	Zm00001eb157900	-	Ubiquitin-conjugating enzyme E2	97.5221	74.3735	26.9595	20.4495	18.6967	Protein homeostasis	-	0.99147
sbi-miR166.3	Sobic.004G302600	4	-1	6985	7005	UCGGACCAGGCUUCAUUCCUC	:: .::::::::::: ..::	AAGUGAUGAAGCCUGGAUUGA	Cleavage	LOC_Os02g24190	-	-	-	-	-	Zm00001eb186000	-	CYCLIN domain-containing protein	38.5246	33.9449	8.53092	10.2721	12.2124	Cell division	-	0.995168
[truncated: 6,173 more rows]

## Sheet: Table 4
Supplementary Table 4. Differentially expressed miRNAs, and their respective fold change values for consecutive stages of seed development.
miRNA ID	(0-1 DAP vs 1-2 DBP)		(10 DAP vs 0-1 DAP)		(20 DAP vs 10 DAP)		(30 DAP vs 20 DAP)
	log2(FoldChange)	q value	log2(FoldChange)	q value	log2(FoldChange)	q value	log2(FoldChange)	q value
sbi-miR1432.1	8.8038	0.00104873	-	-	-	-	-	-
sbi-miR156.3	-	-	-1.39917	0.000245293	-	-	-4.28656	0.0098193
sbi-miR156.4	-	-	-	-	-	-	-8.58056	0.0206612
sbi-miR156.5	-	-	4.48238	2.70529e-14	1.34567	0.00430611	-	-
sbi-miR159.2	-	-	27.2859	1.03491e-09	-	-	-	-
[truncated: 97 more rows]

## Sheet: Table 5
Supplementary Table 5. List of 1507 miRNA-target modules involved in the regulation of seed size. miRNAs and targets known for seed size regulation are highlighted in blue and yellow color respectively.
[truncated: 1,510 more rows]

[truncated: 7 more sheets: Table 6, Table 7, Table 8, Table 9, Table 10, Table 11, Reference List]
